# Supplementary material for: Incidence, mortality, risk factors, and trends for Hodgkin lymphoma: a global data analysis
Source: PubMed Central journal article supplement (PMC9097358; doi:10.1186/s13045-022-01281-9), 2022-05-11
Supplement: 13045_2022_1281_MOESM1_ESM.pdf [file 13045_2022_1281_MOESM1_ESM.pdf]

## **Supplementary Figures Legends**

**Supplementary Figure 1.** Associations between risk factors and Hodgkin lymphoma incidence by age

**Supplementary Figure 2.** Associations between risk factors and Hodgkin lymphoma mortality by age

**Supplementary Figure 3.** Incidence and mortality trends for individual countries

**Supplementary Figure 4.** Results of joinpoint regression for individual countries

**Supplementary Figure 5.** AAPC of Hodgkin lymphoma incidence aged 50 years and older

**Supplementary Figure 6.** AAPC of Hodgkin lymphoma incidence aged < 50 years old

**Supplementary Figure 7.** AAPC of Hodgkin lymphoma incidence aged < 40 years old

**Supplementary Figure 1.** Associations between risk factors and Hodgkin lymphoma incidence by age

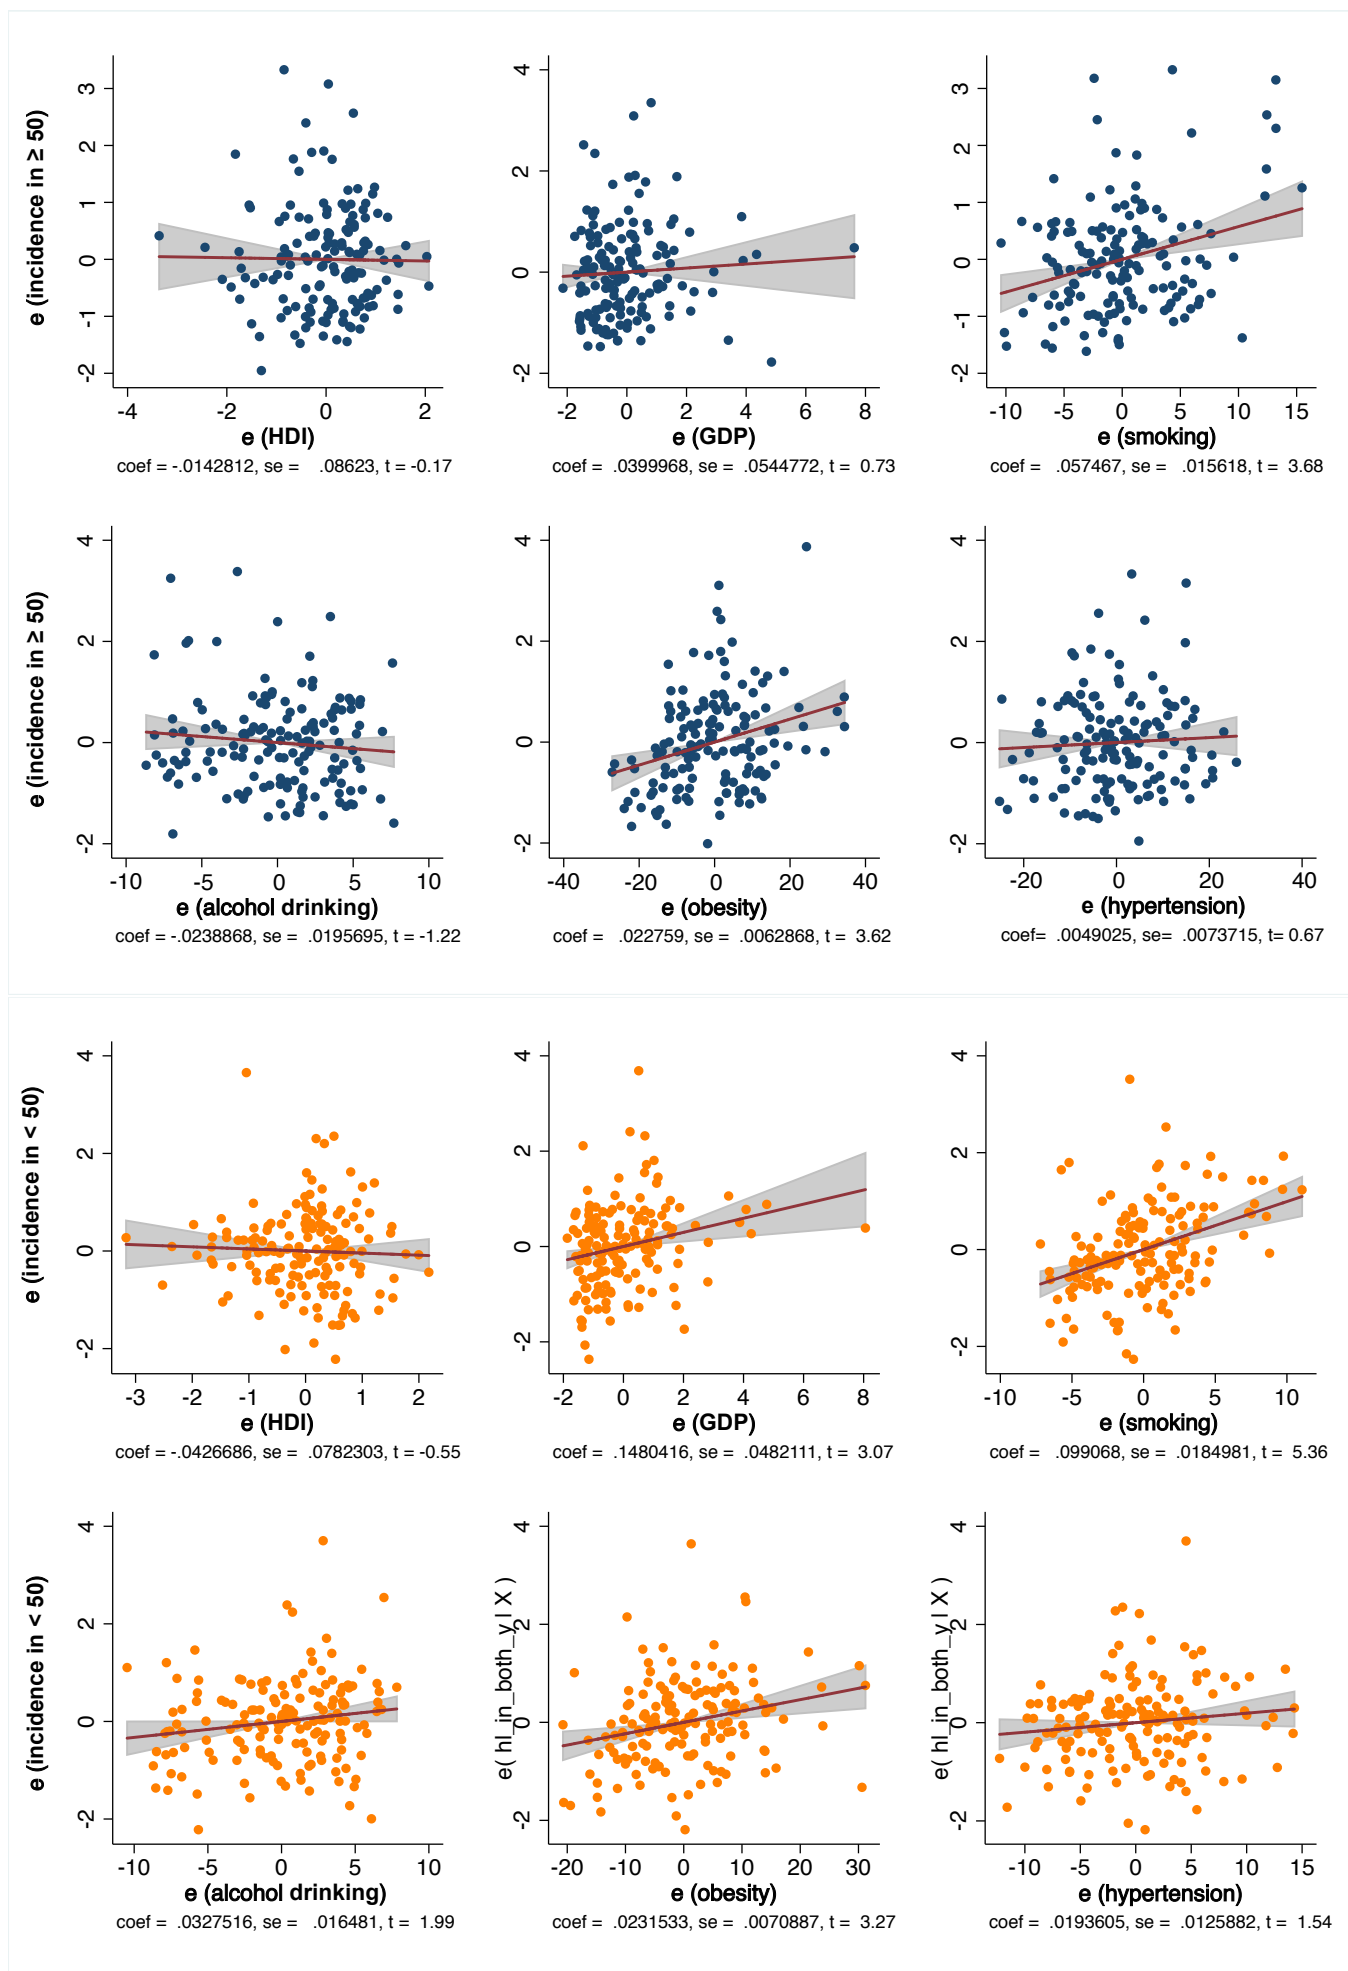

The added-variable plots were generated using multi-variable linear regression models. e, residuals; HDI, human development index; GDP, gross domestic products

**Supplementary Figure 2.** Associations between risk factors and Hodgkin lymphoma mortality by age

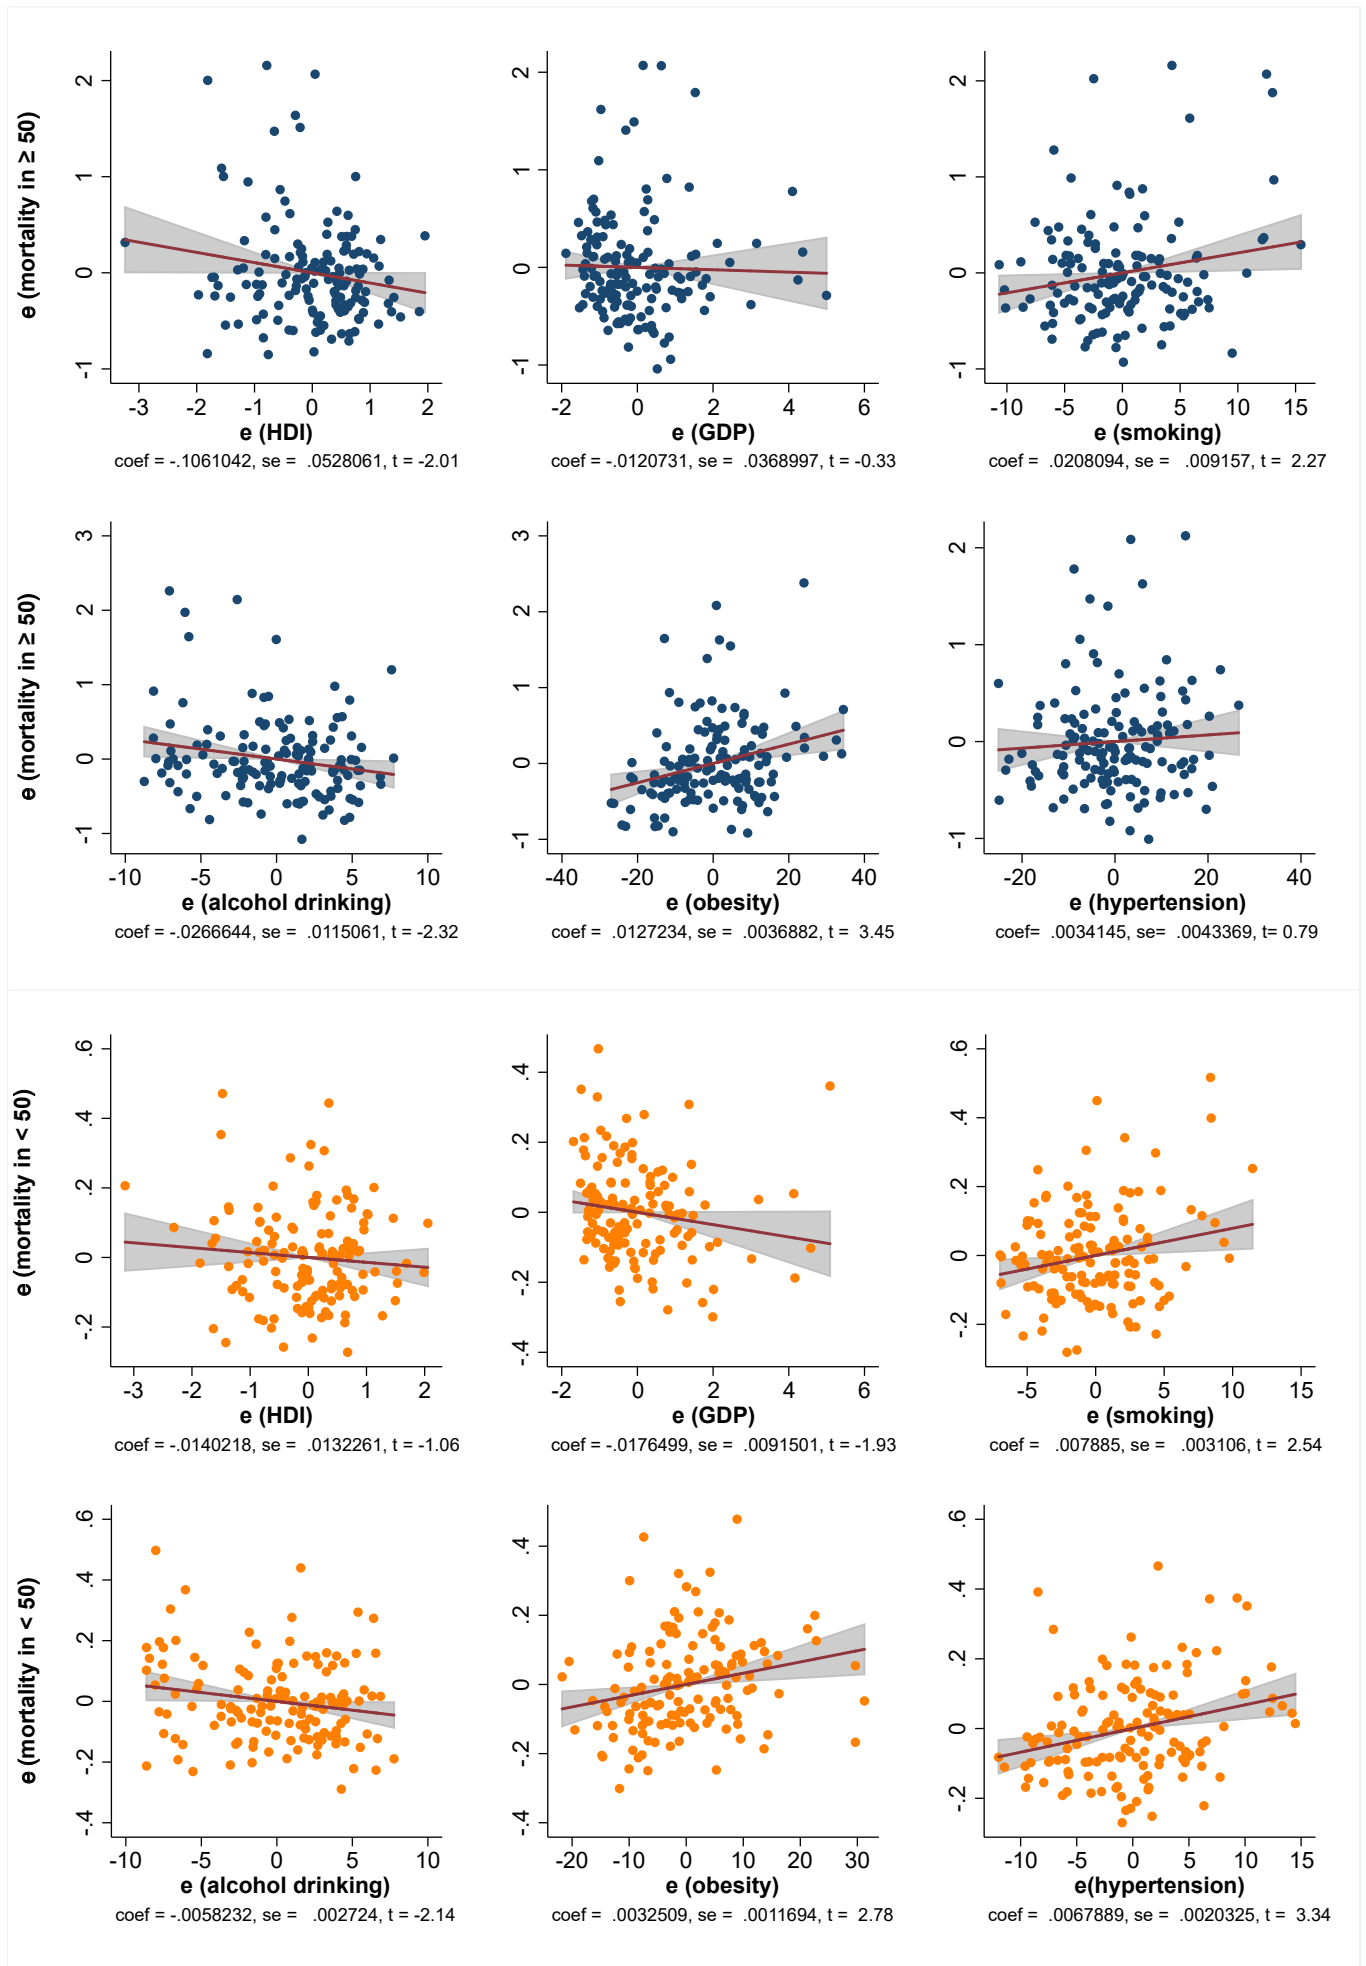

The added-variable plots were generated using multi-variable linear regression models. e, residuals; HDI, human development index; GDP, gross domestic products

Supplementary Figure 3. Incidence and mortality trends for individual countries

Male

Asia

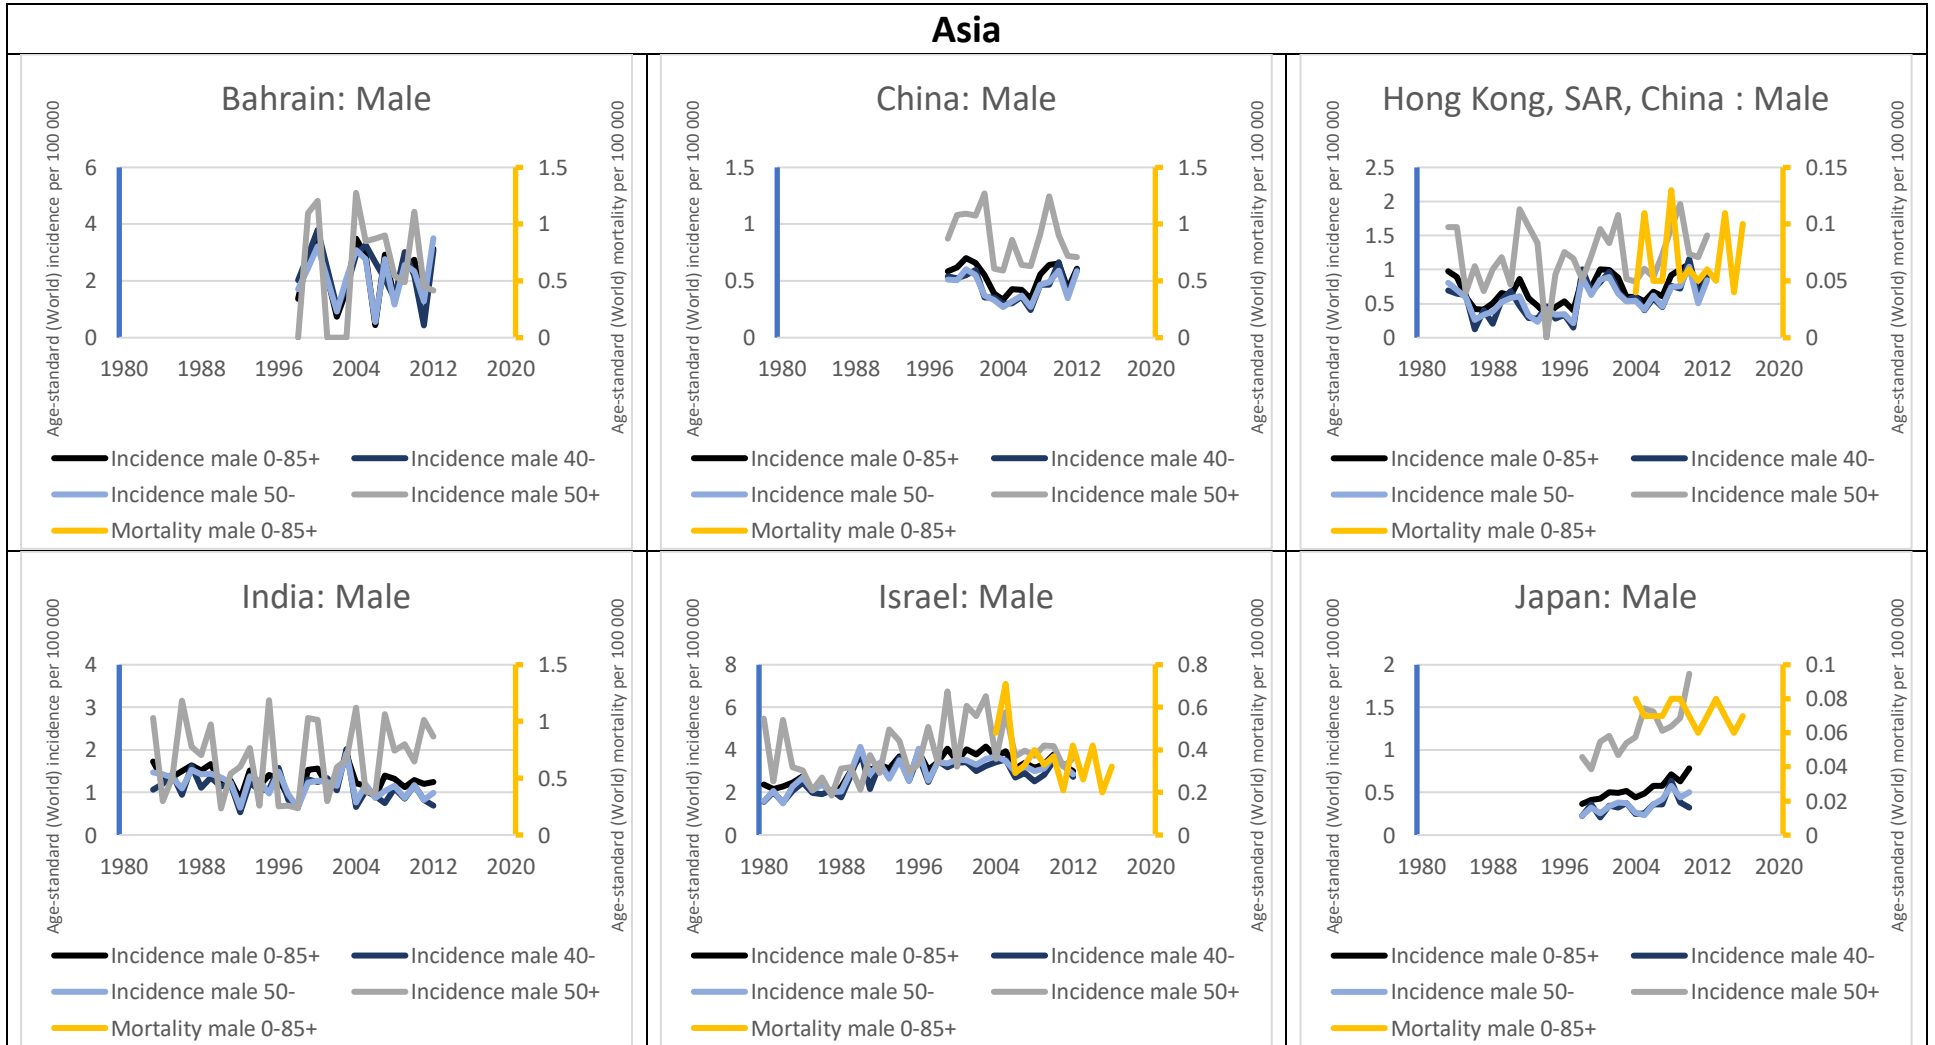



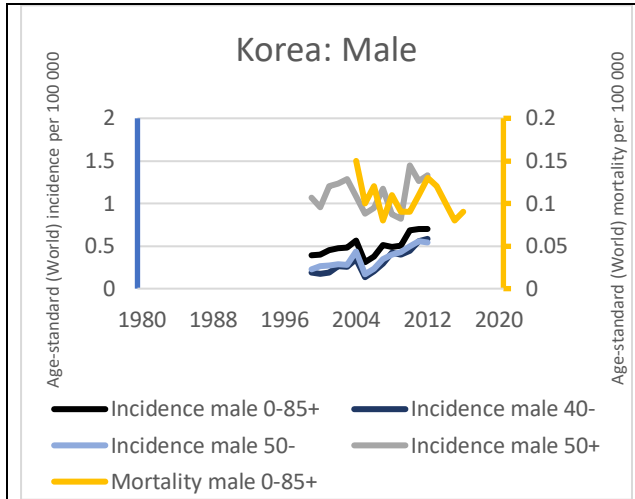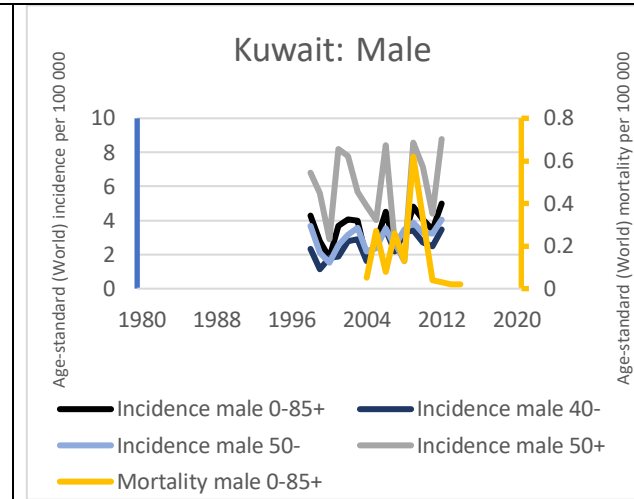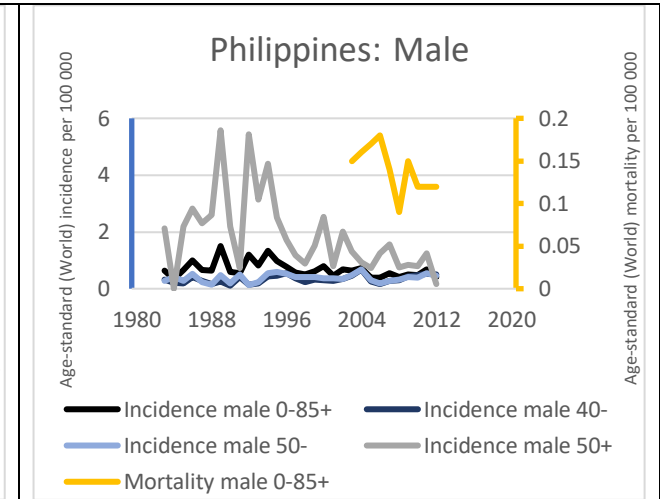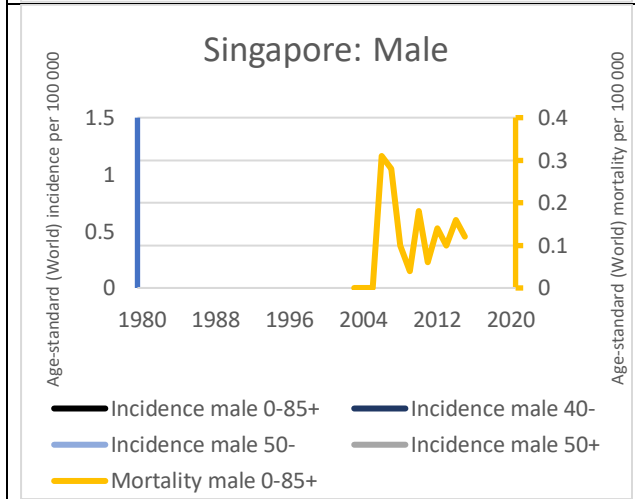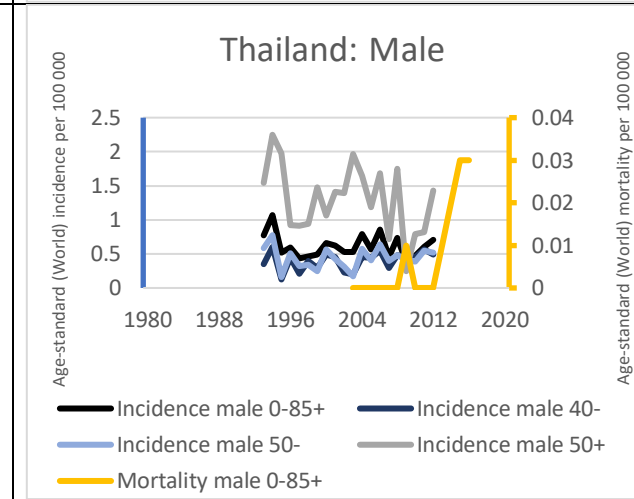

## Oceania

### Australia: Male

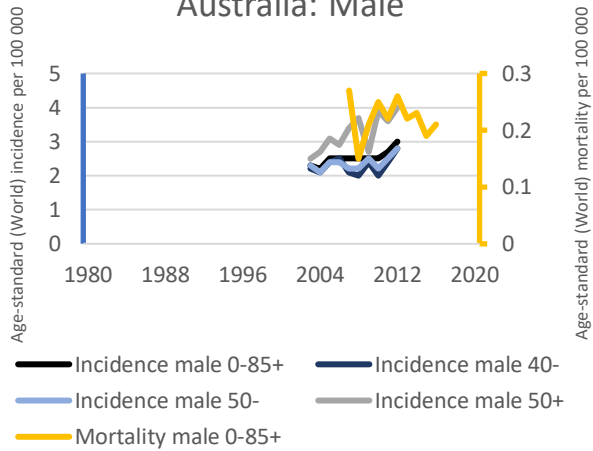

### New Zealand: Male

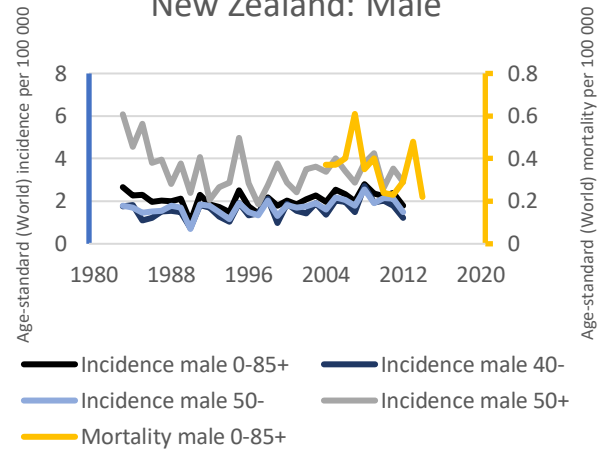

## North America

### Canada: Male

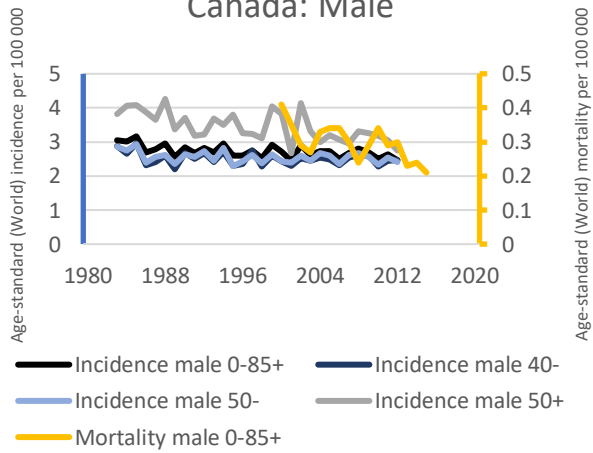

### USA: Male

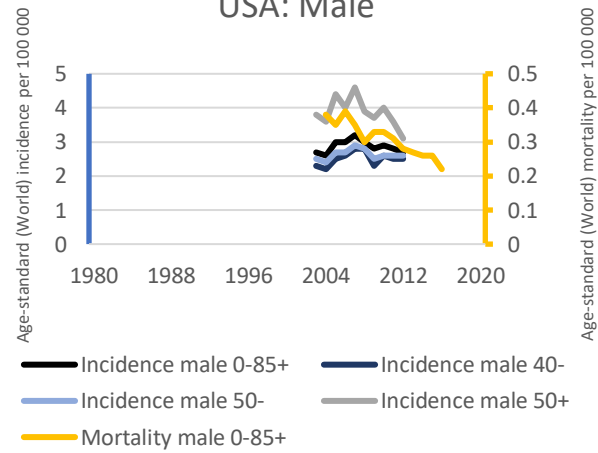

### USA Black: Male

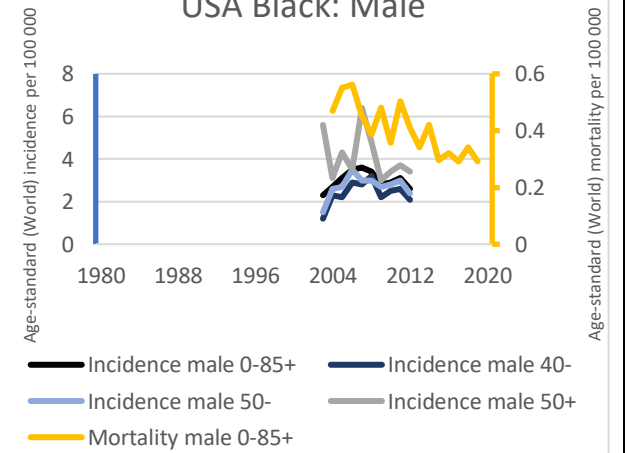

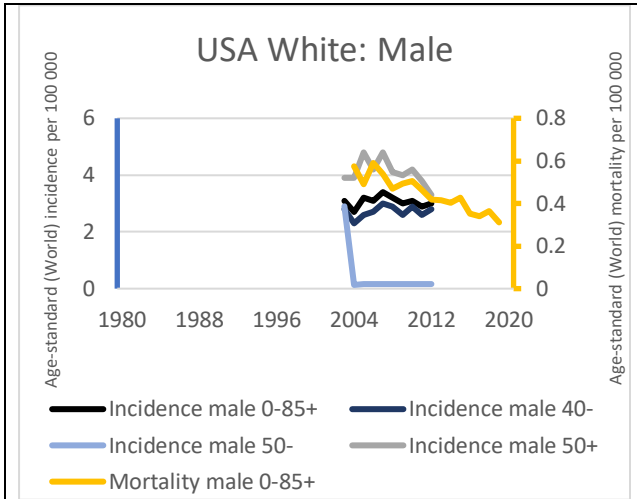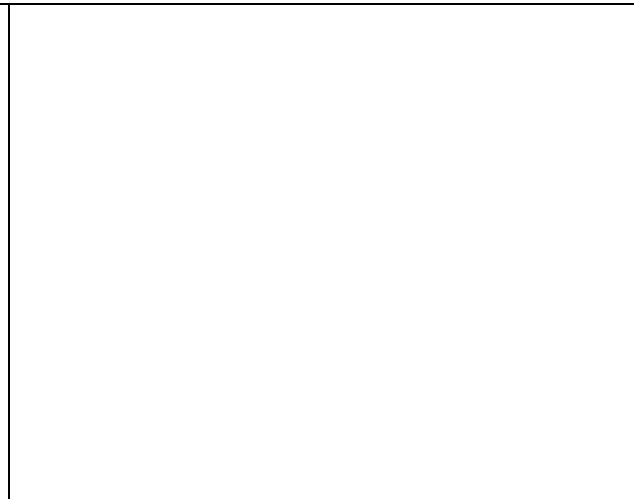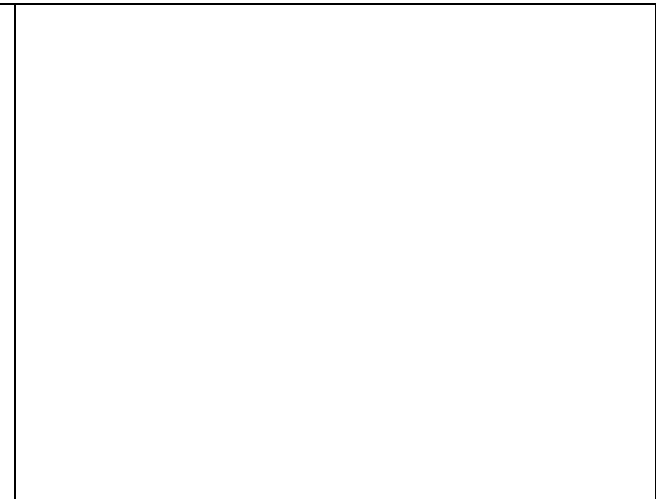

## South America

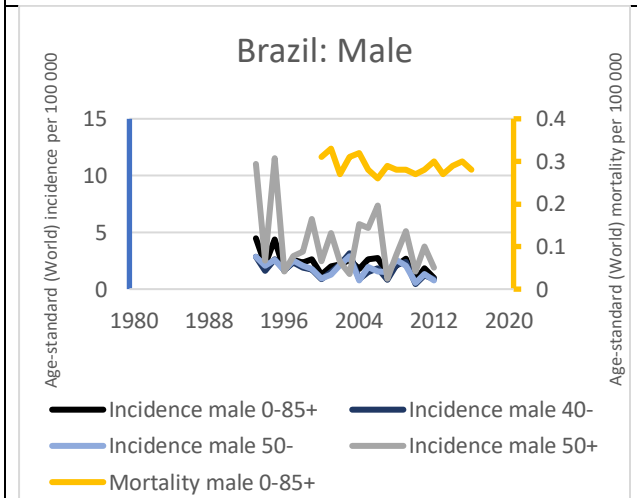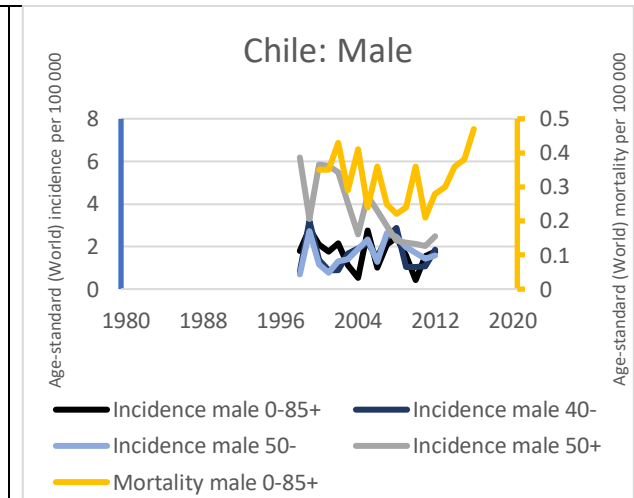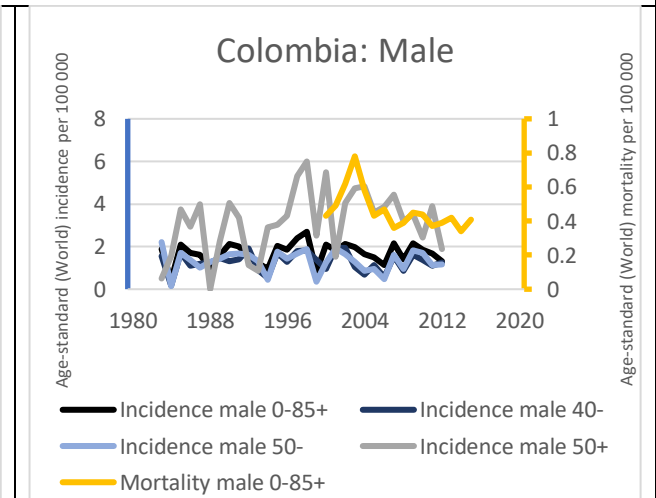

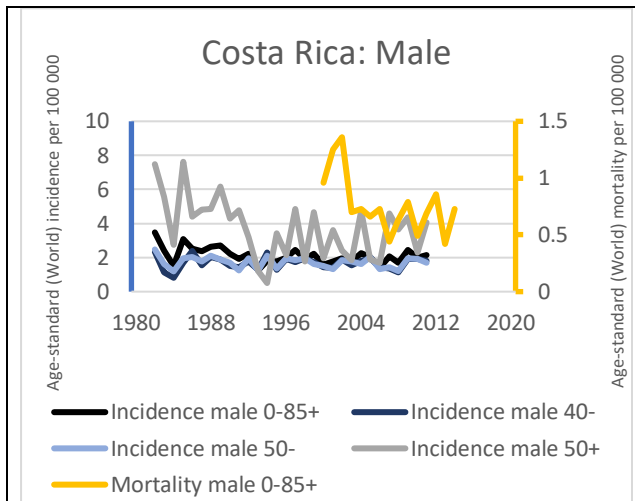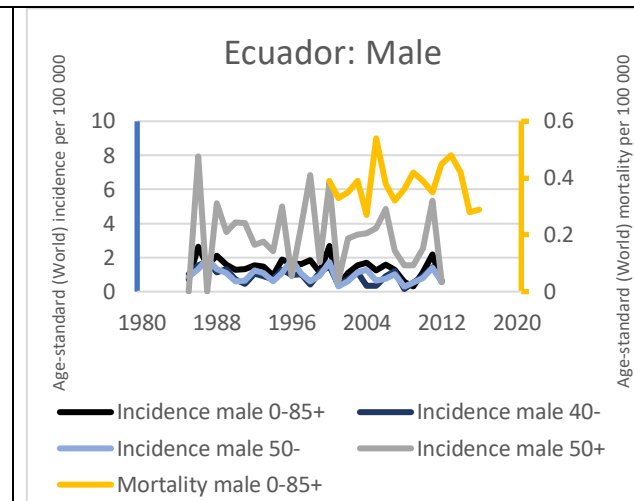

## Northern Europe

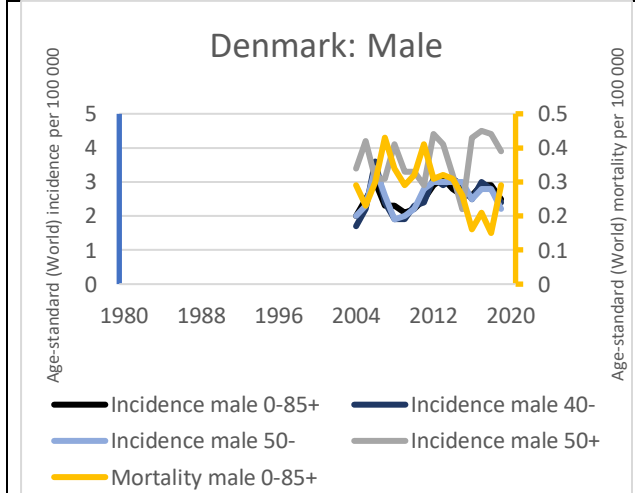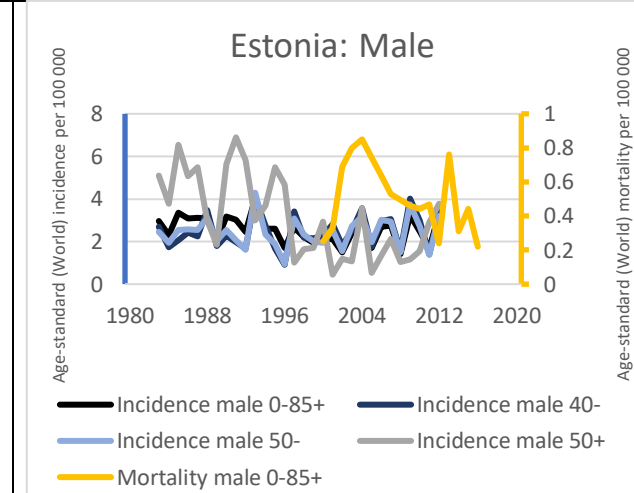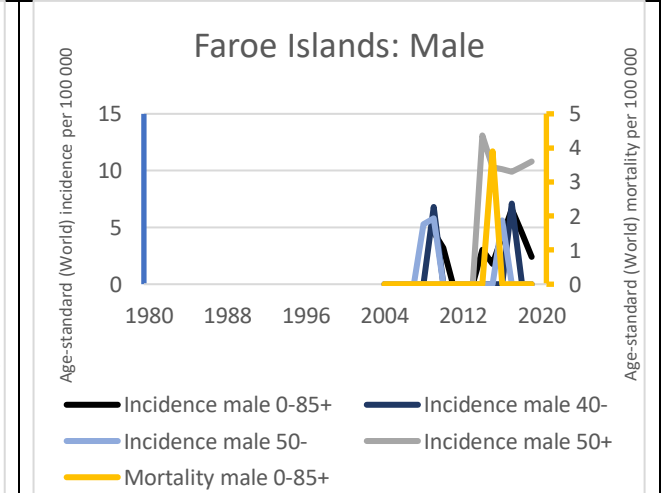

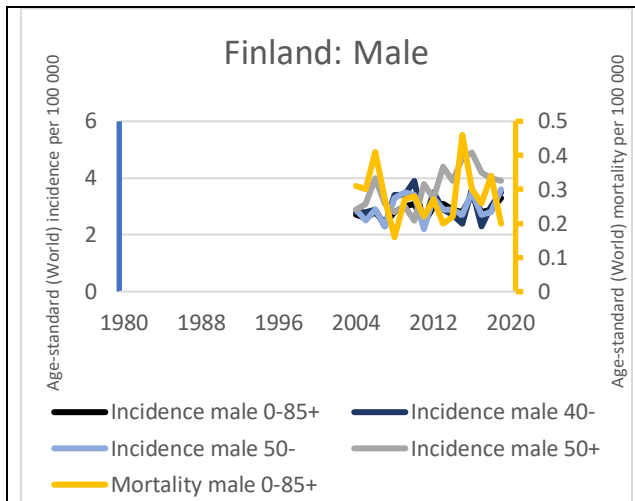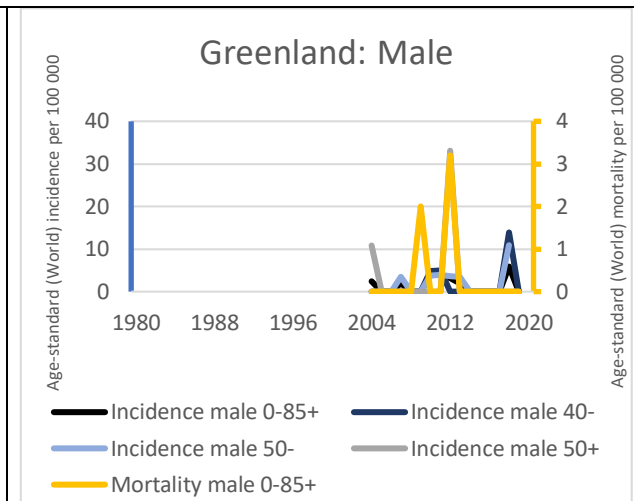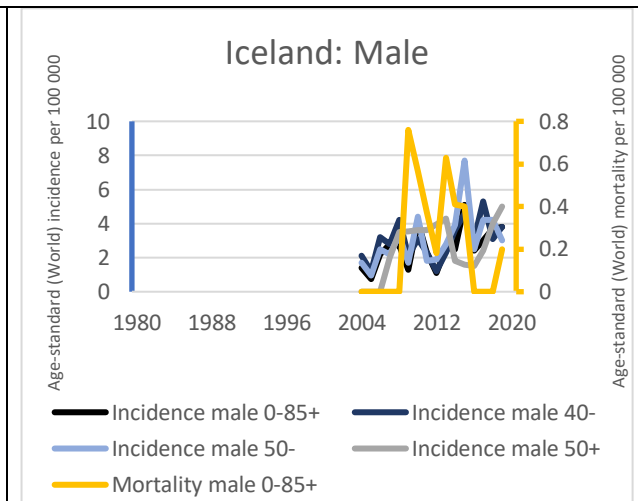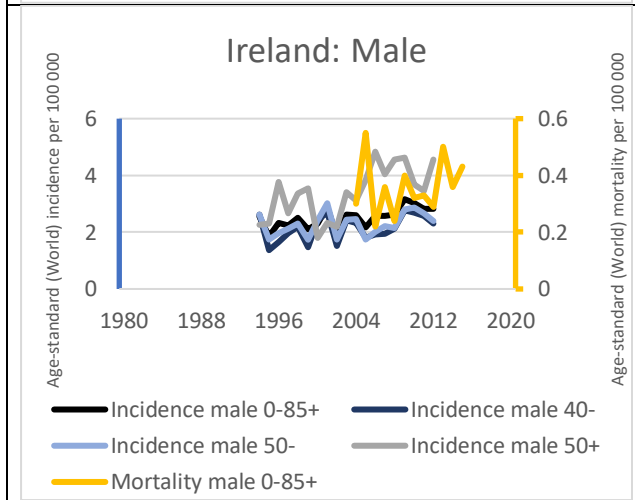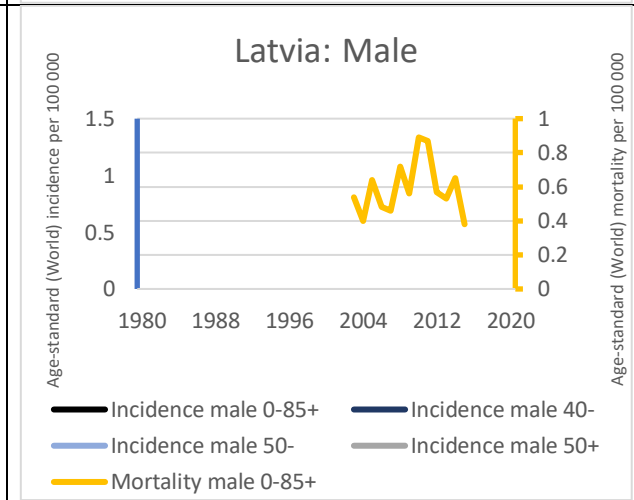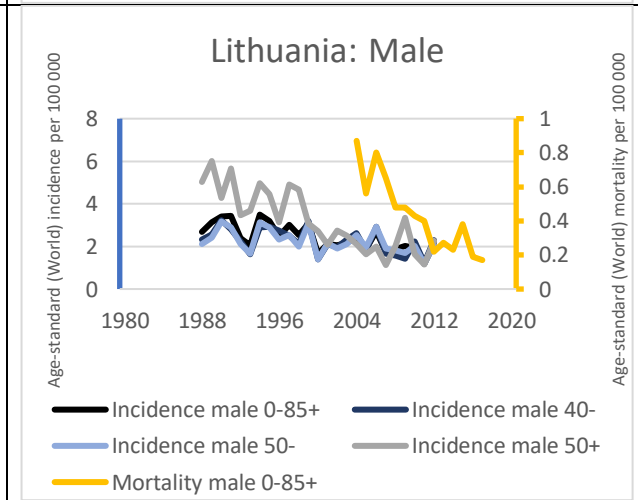

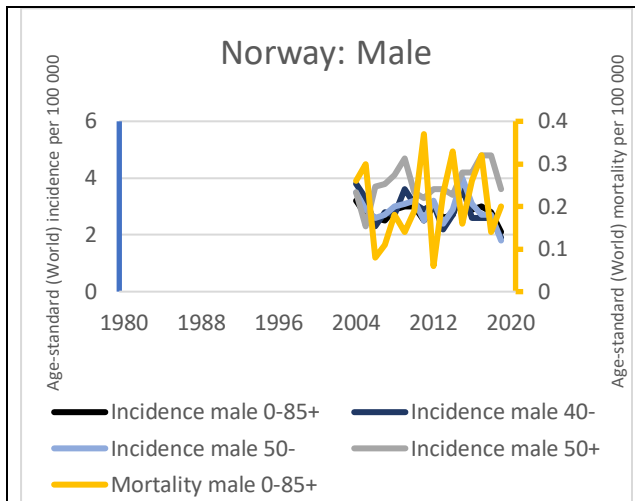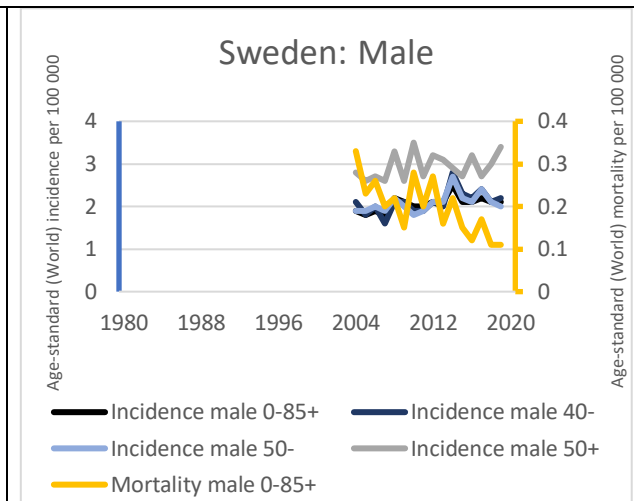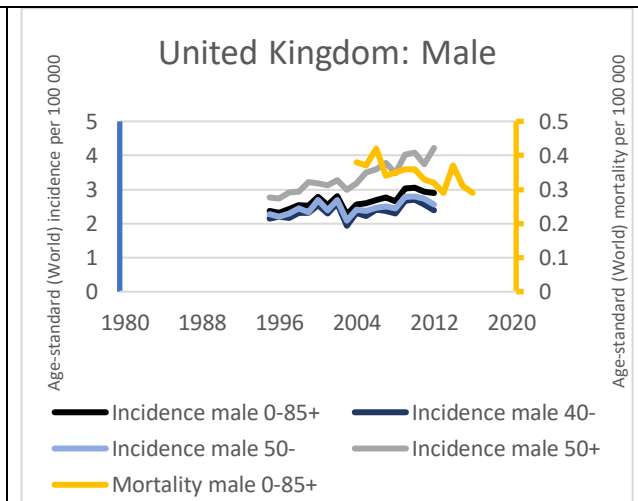

## Western Europe

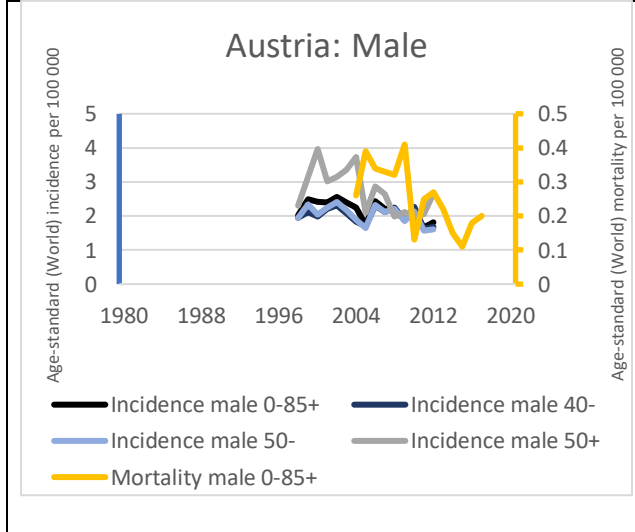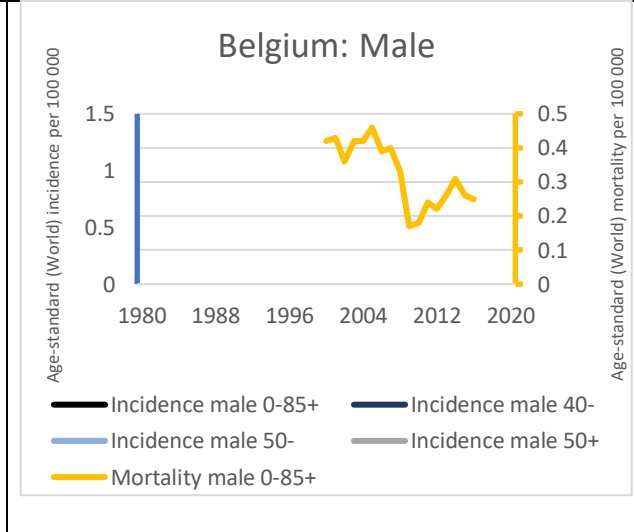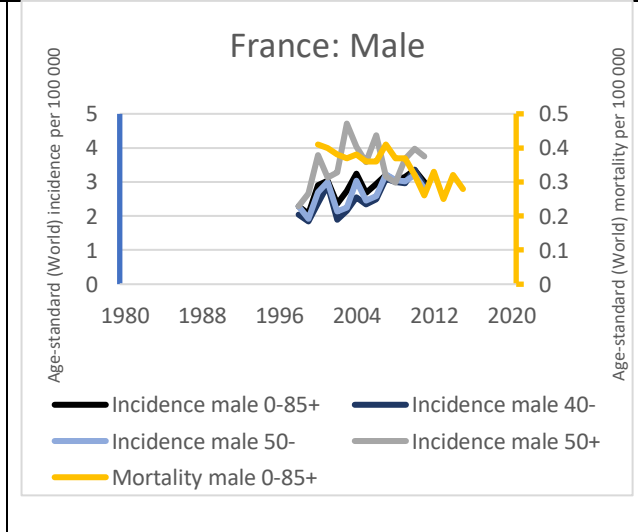

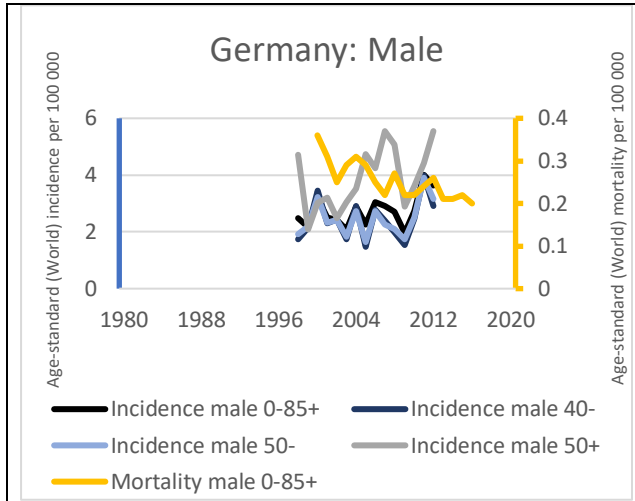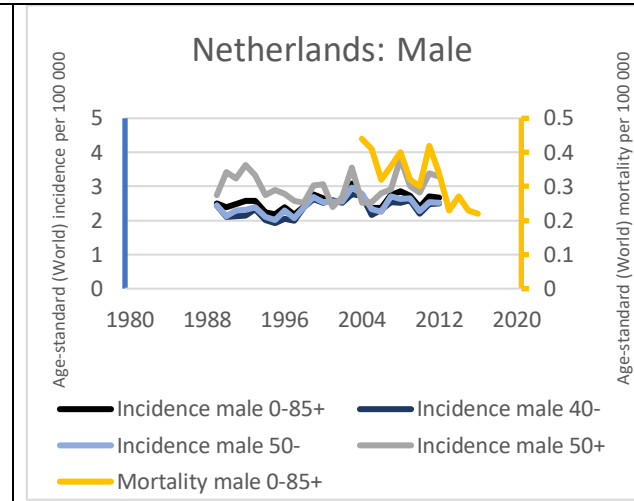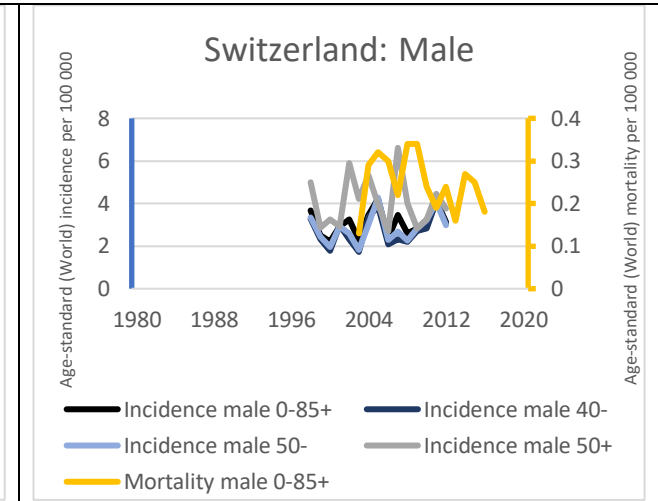

## Southern Europe

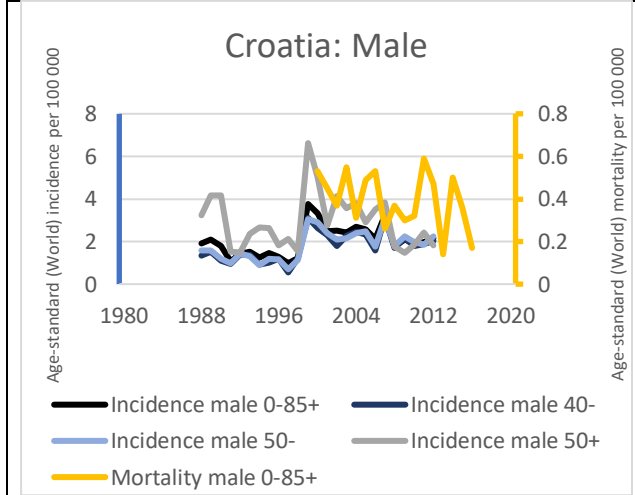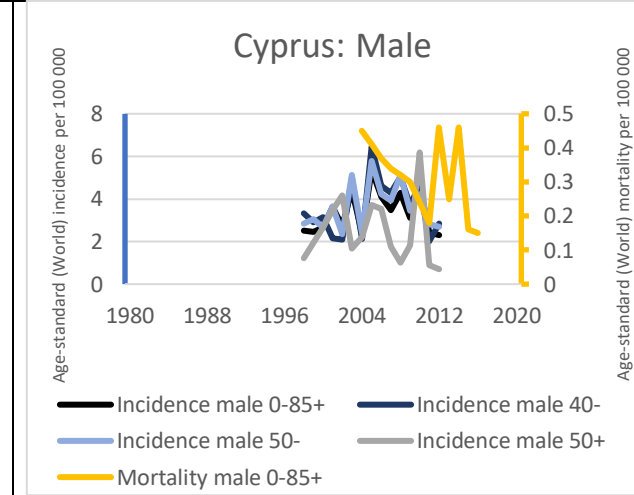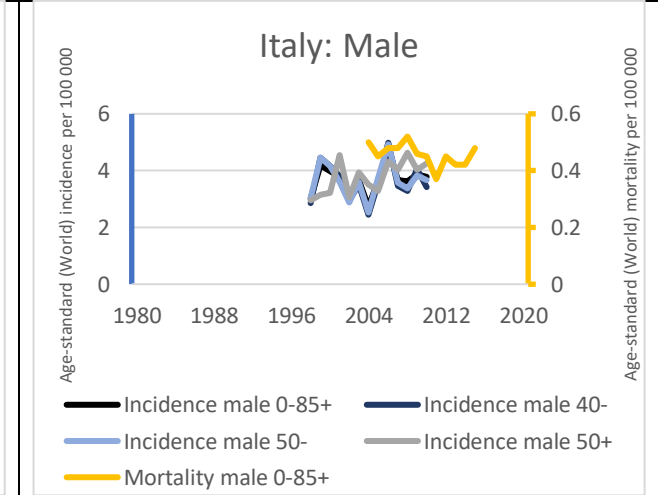

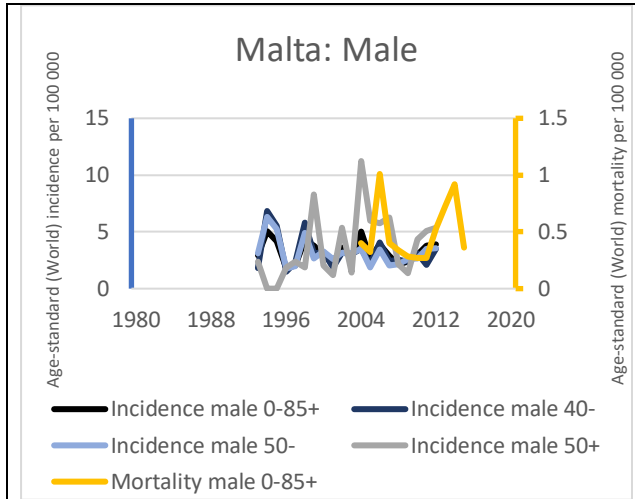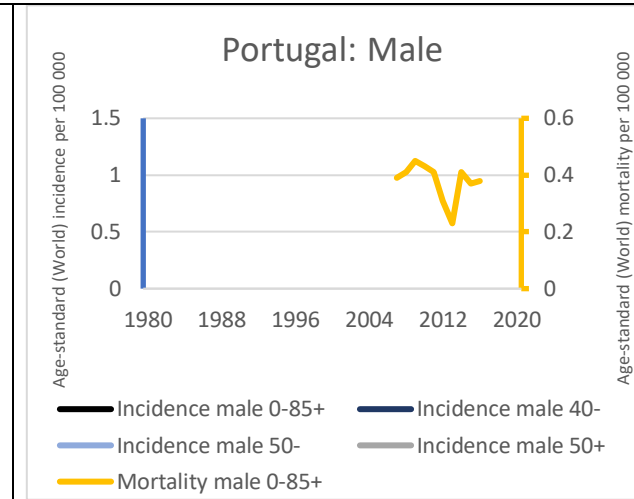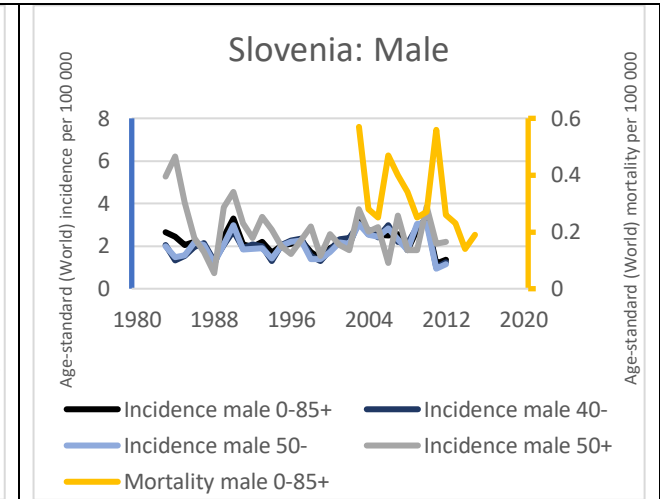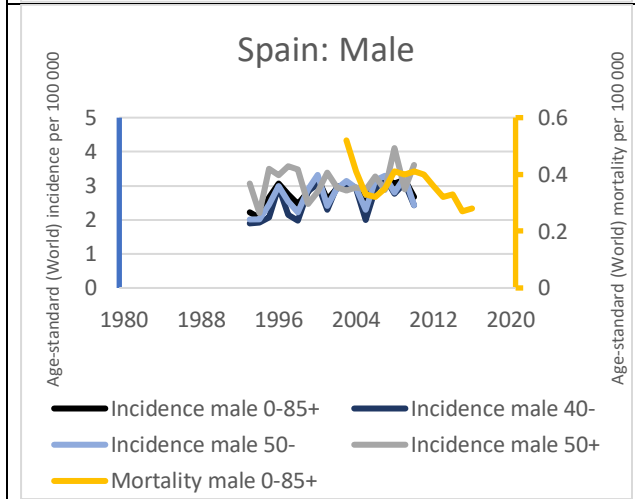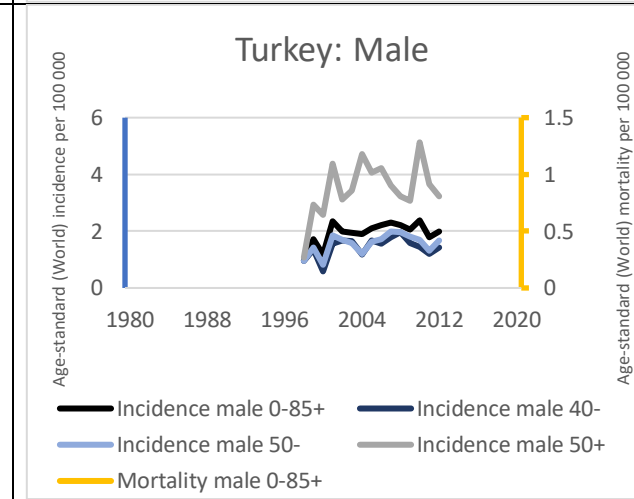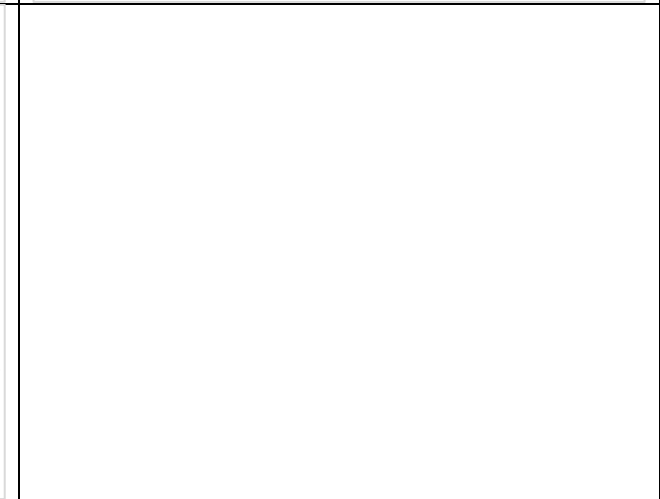



## Eastern Europe

### Belarus: Male

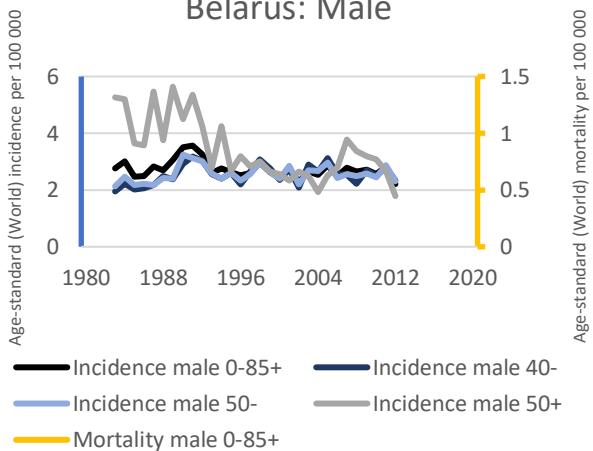

### Bulgaria: Male

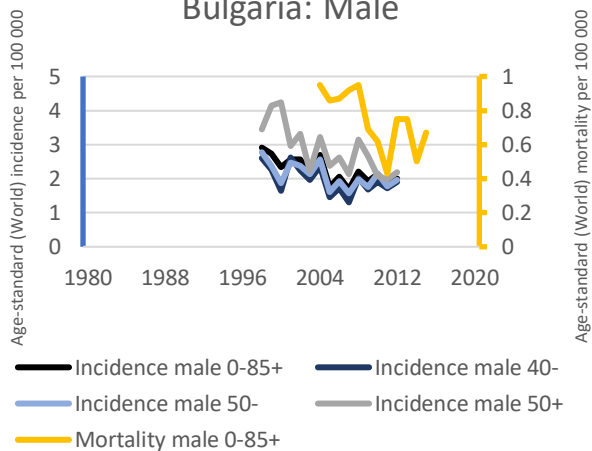

### Czech Republic: Male

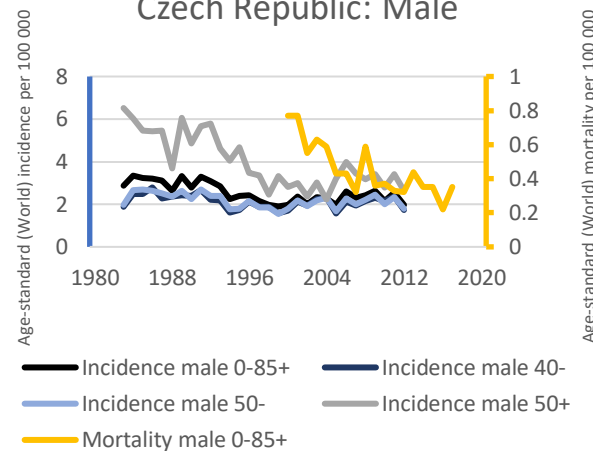

### Poland: Male

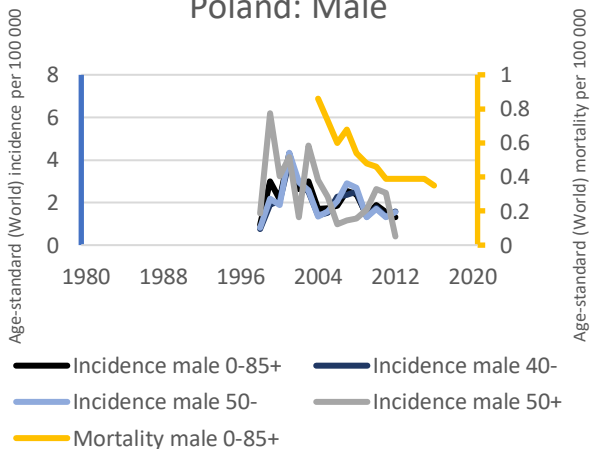

### Slovakia: Male

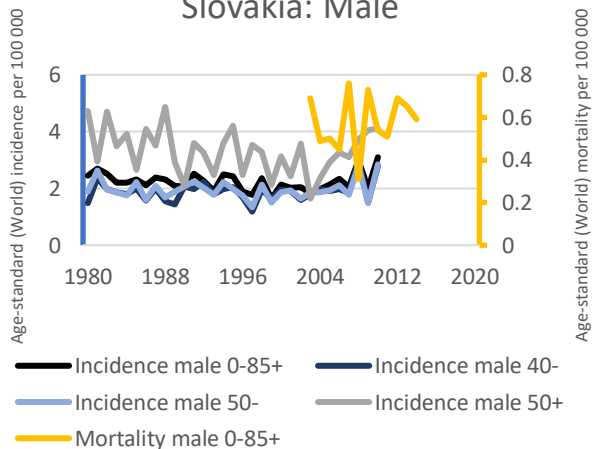

# Africa

## Uganda: Male

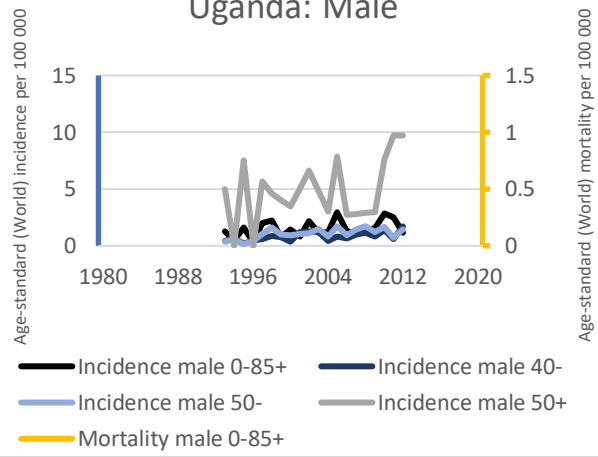

## Female

### Asia

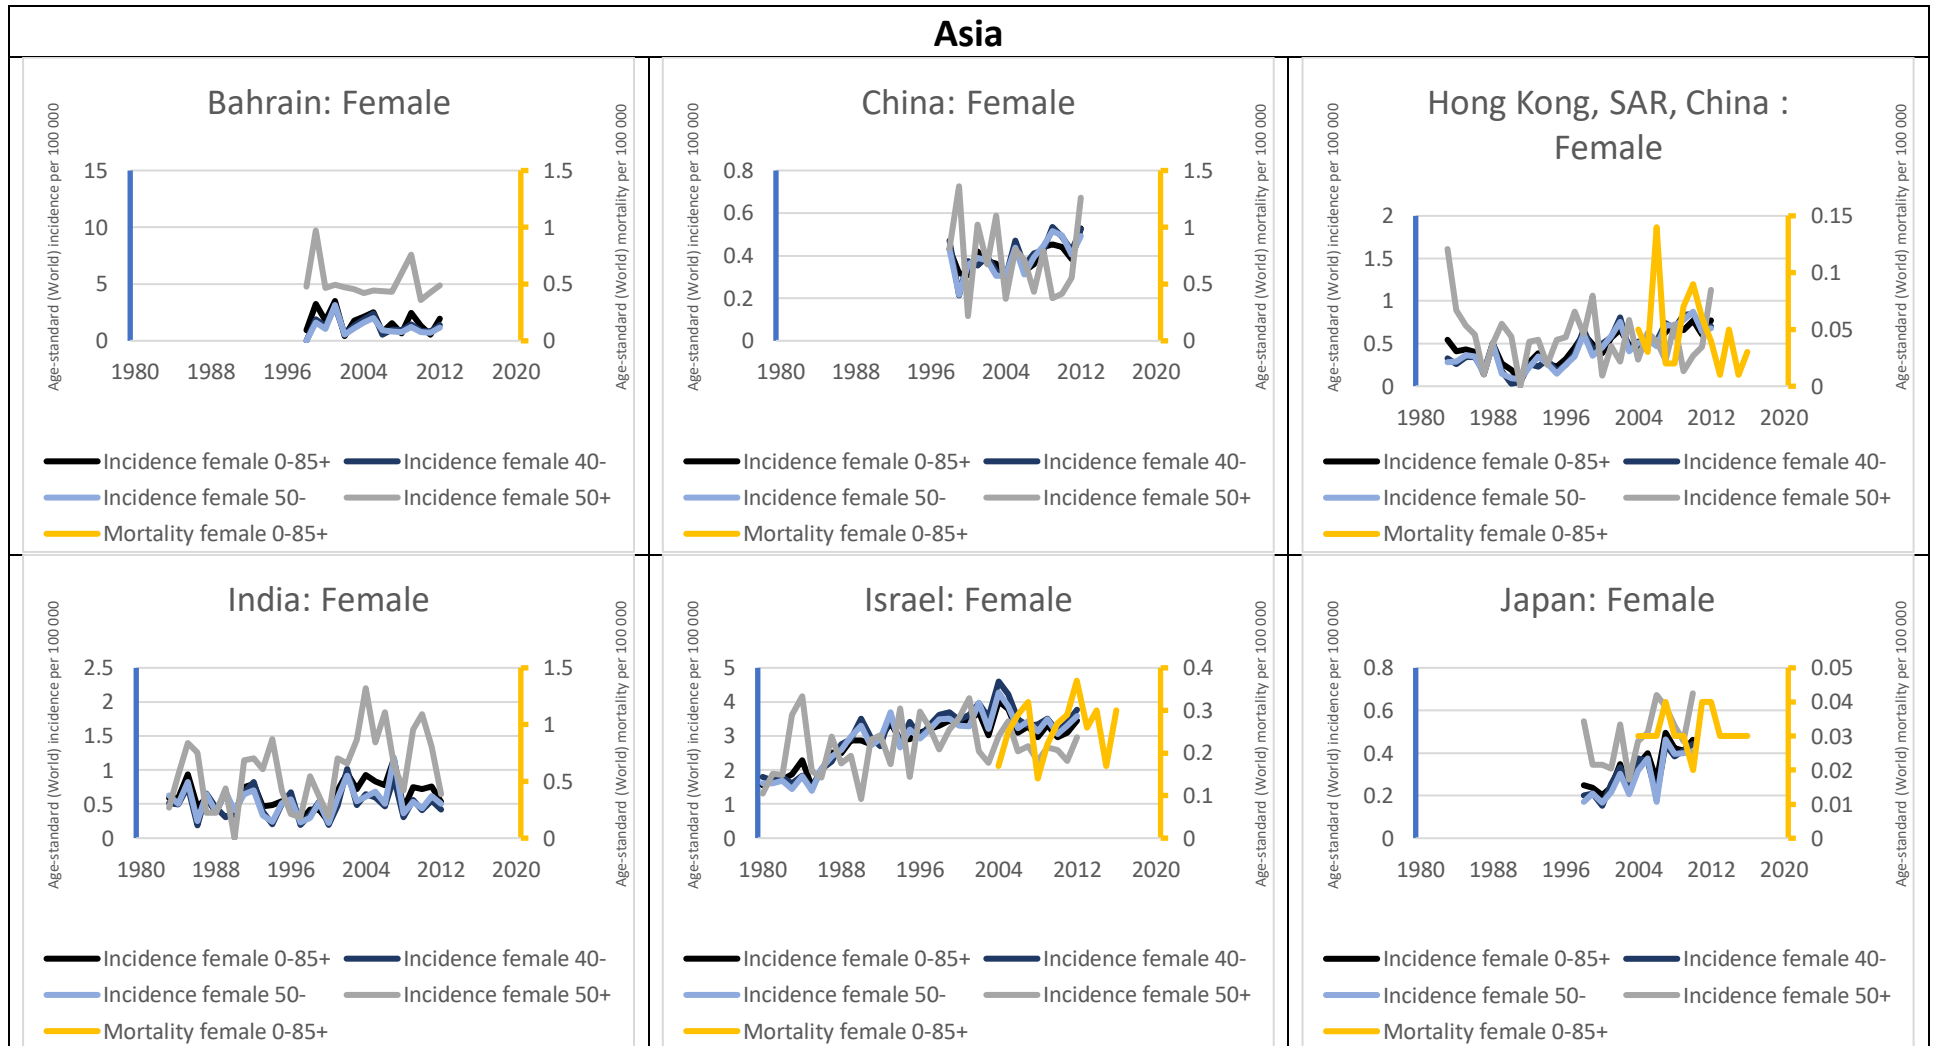

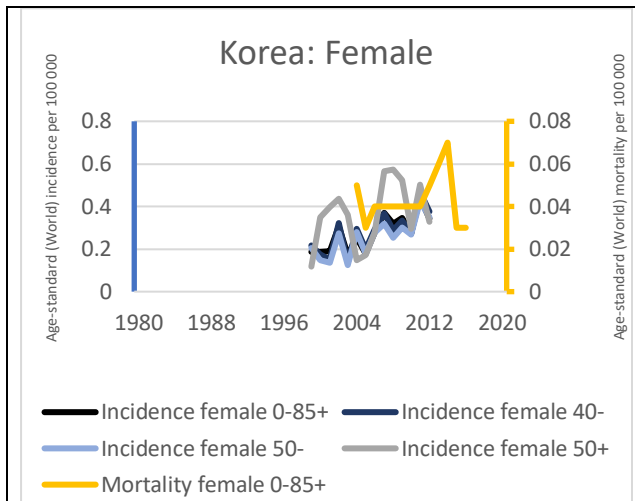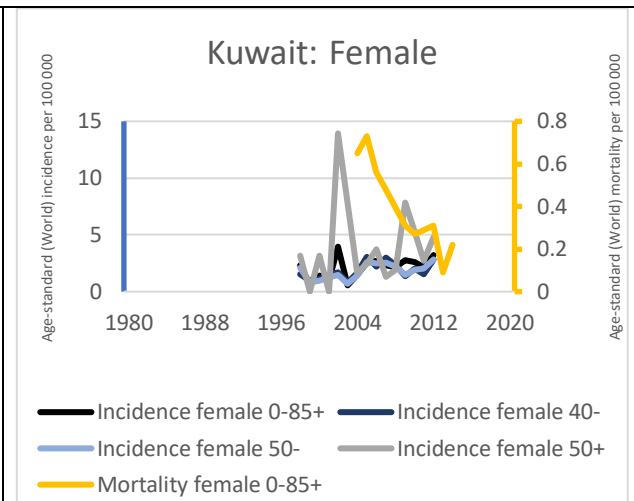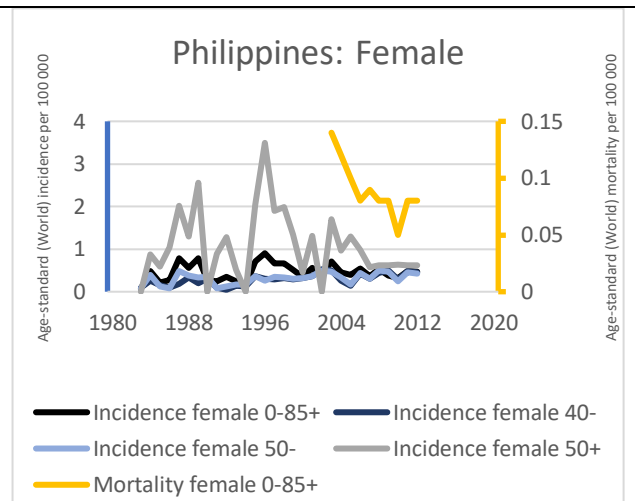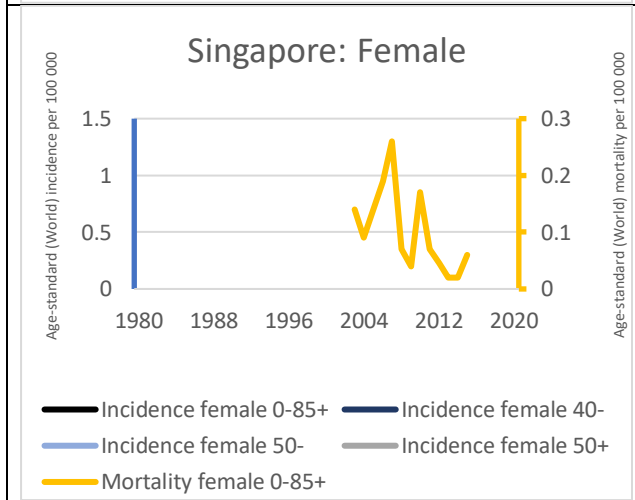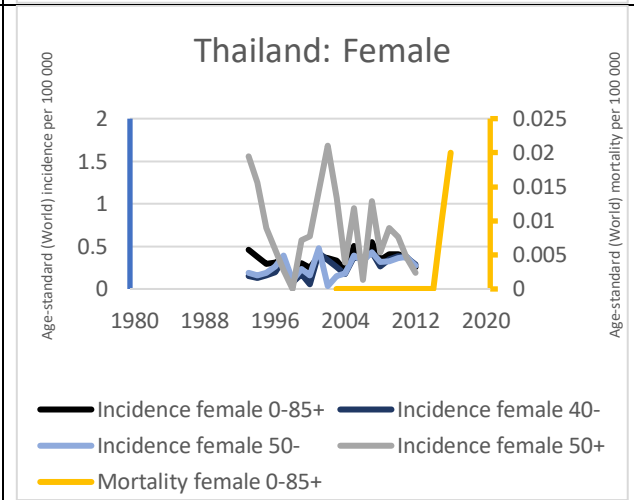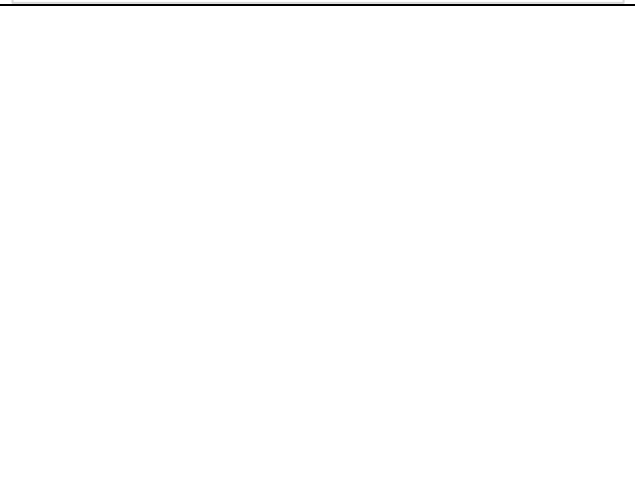

## Oceania

### Australia: Female

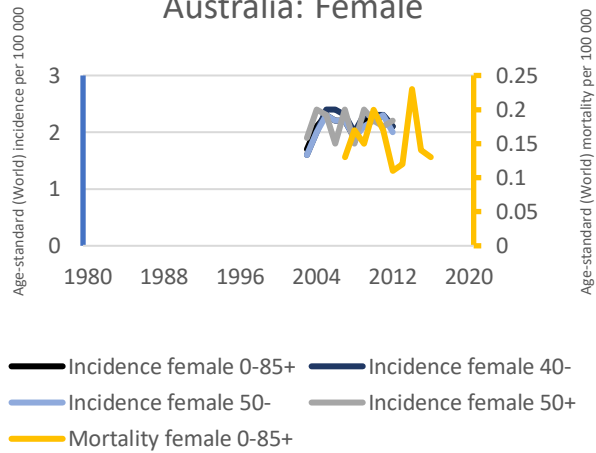

### New Zealand: Female

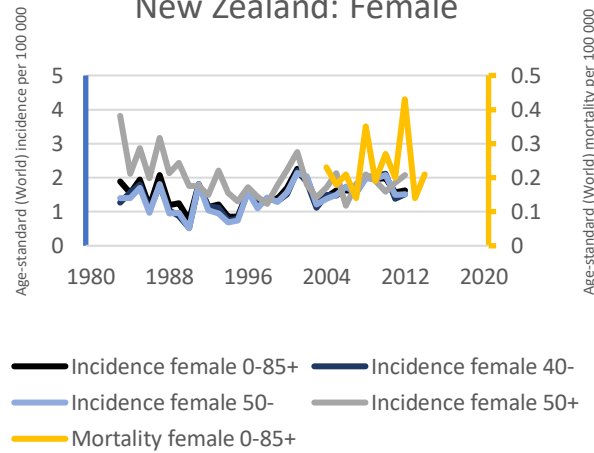

## North America

### Canada: Female

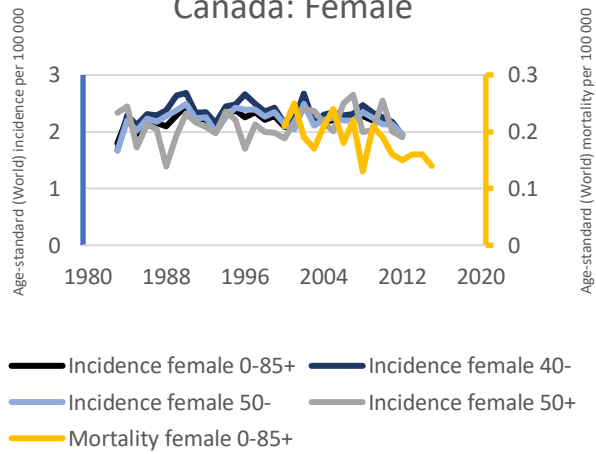

### USA: Female

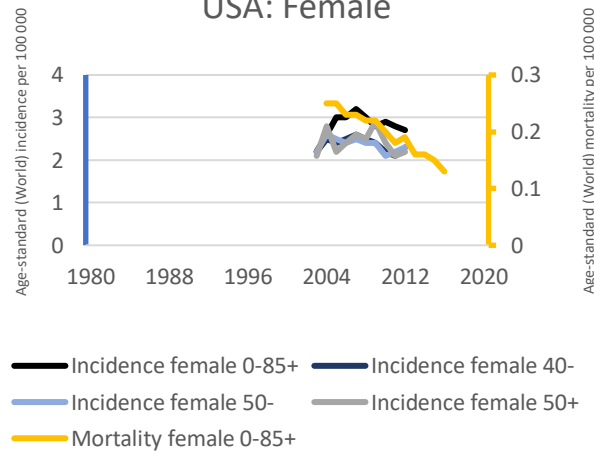

### USA Black: Female

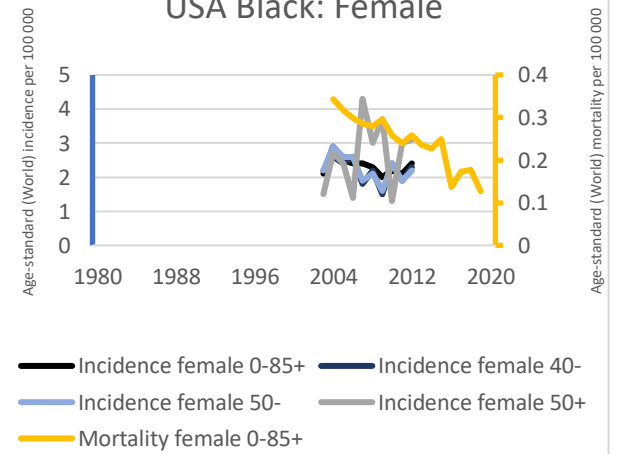

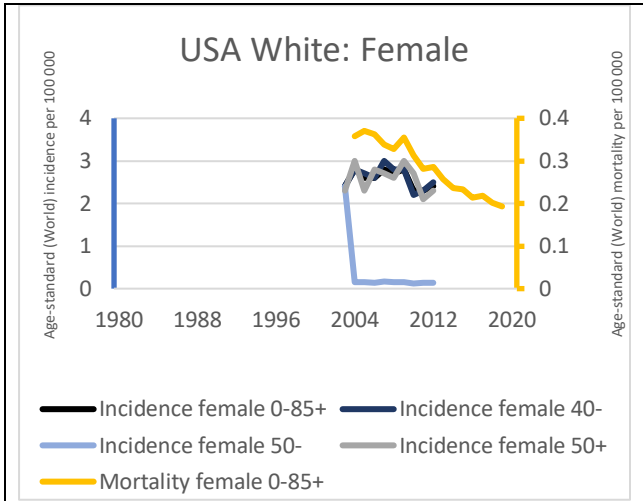

## South America

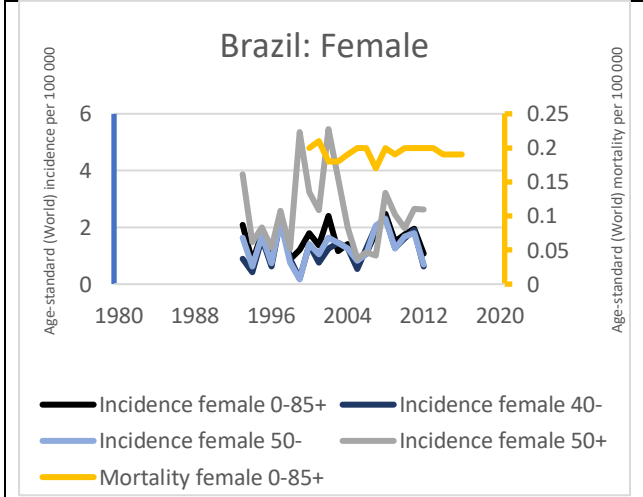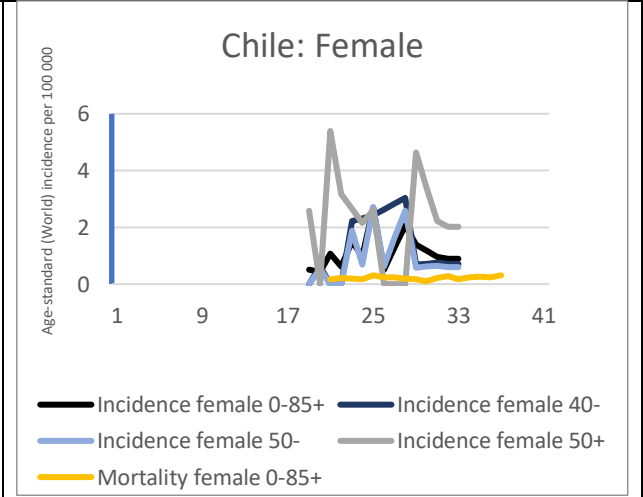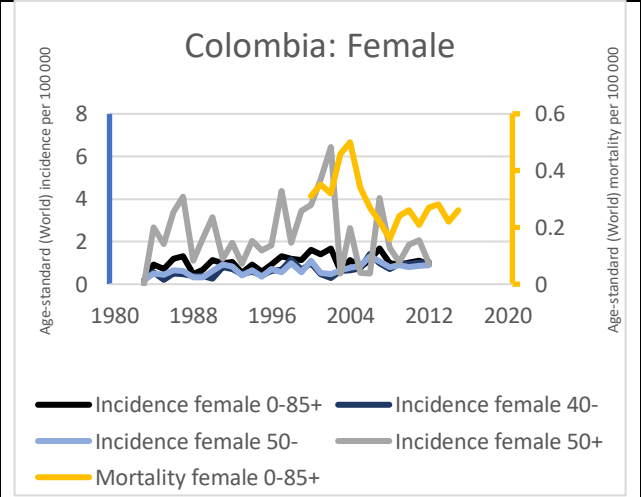

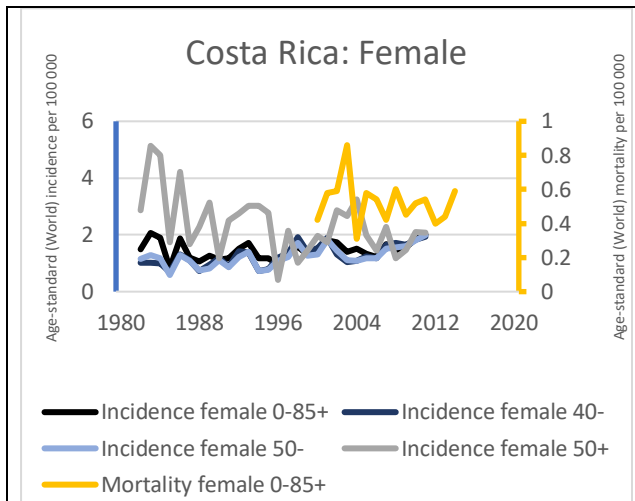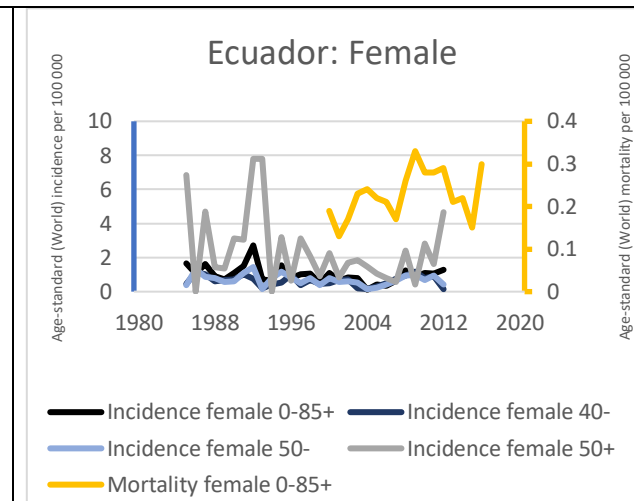

## Northern Europe

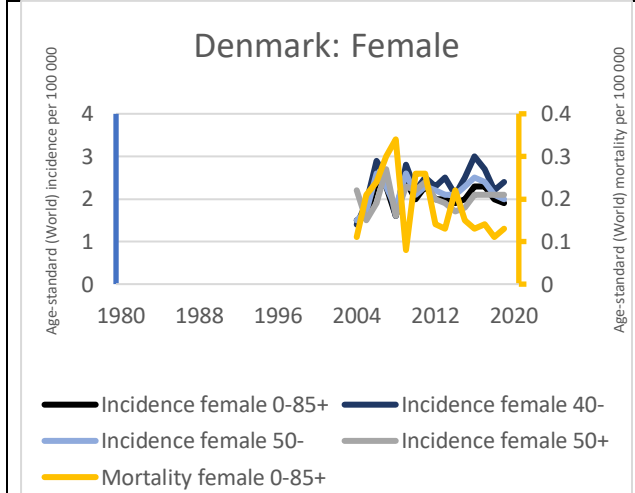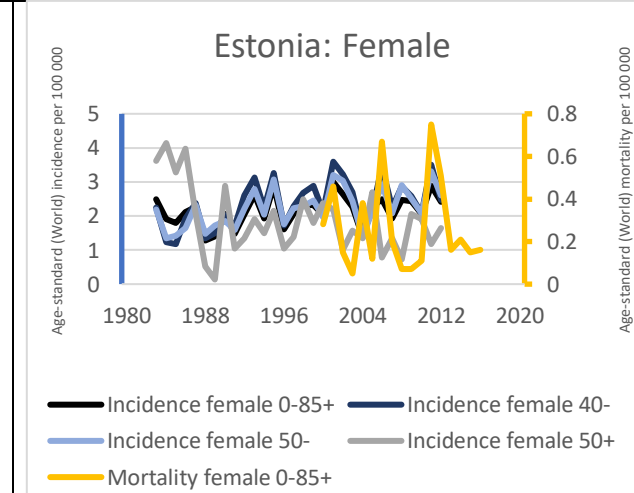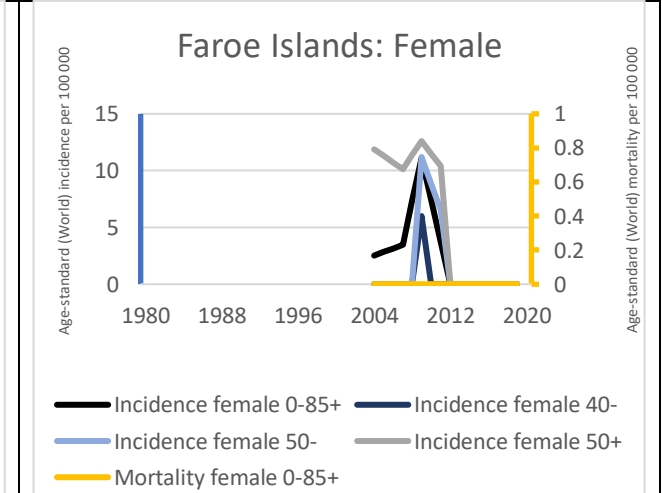

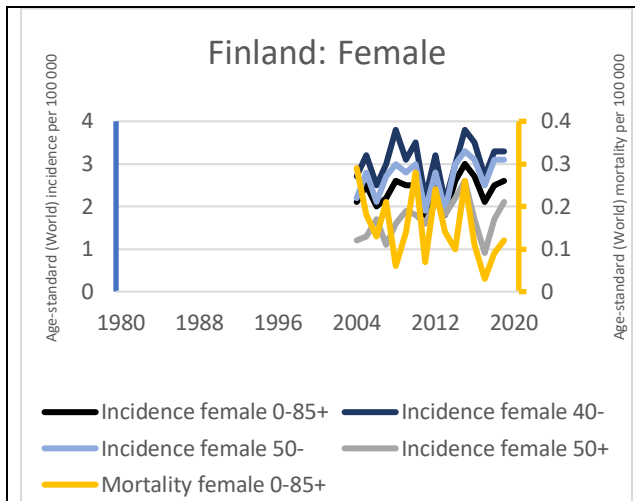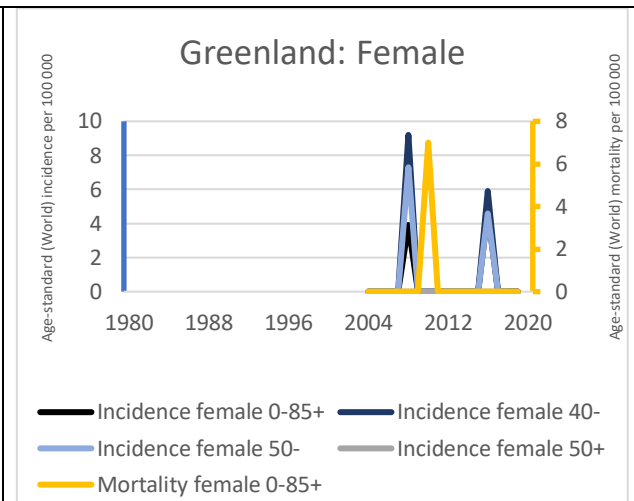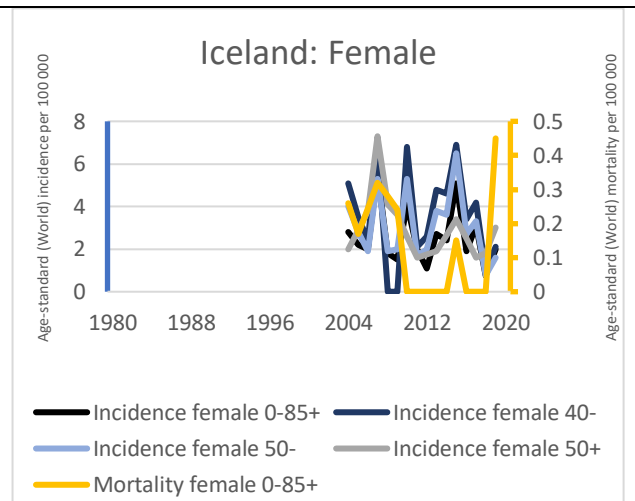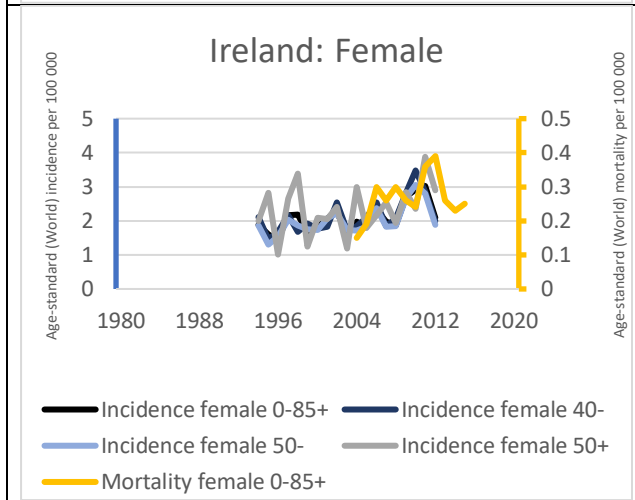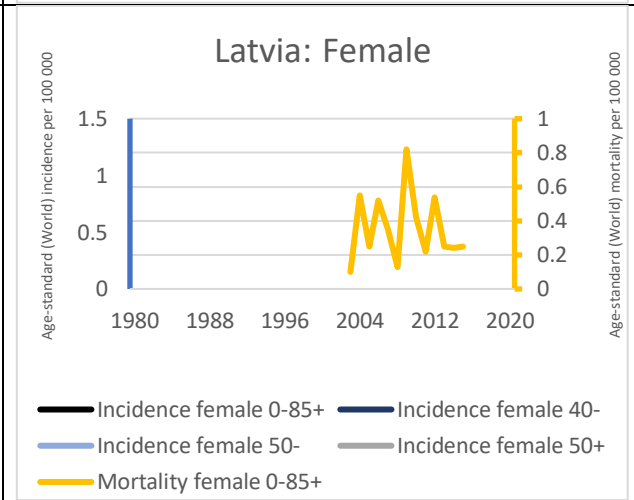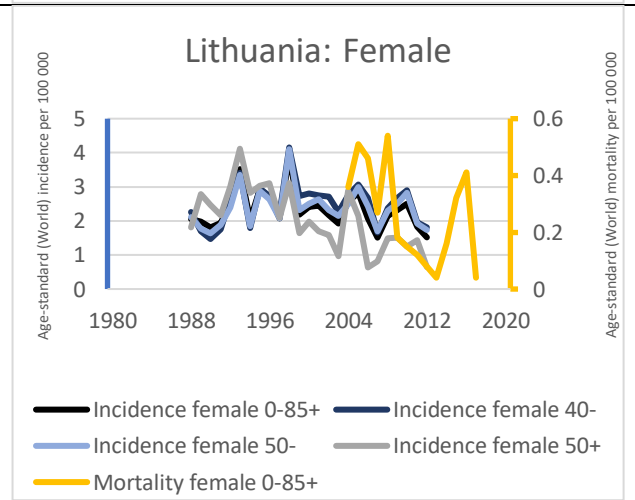



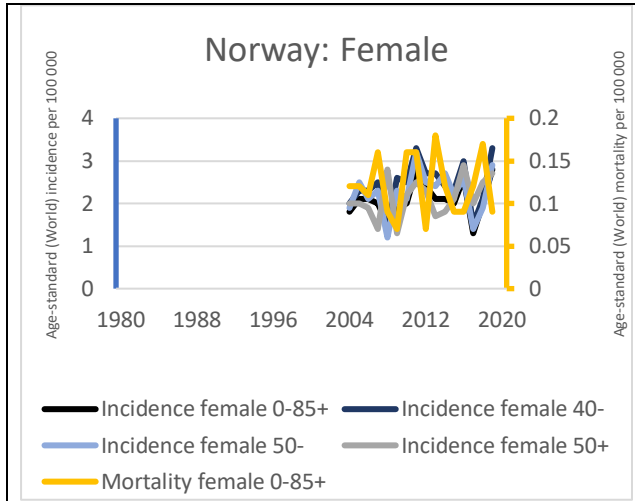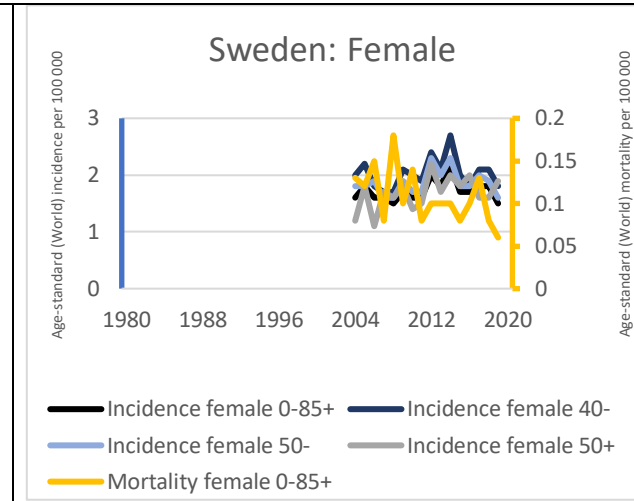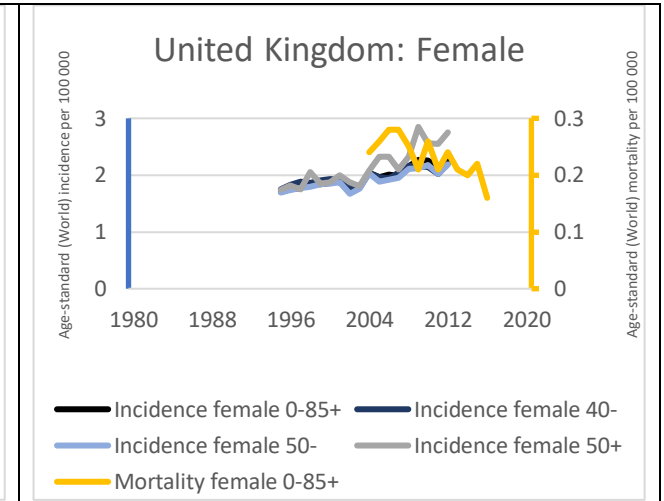

## Western Europe

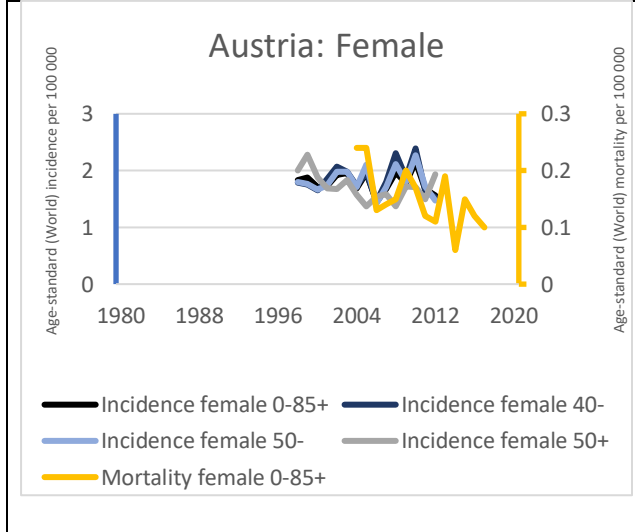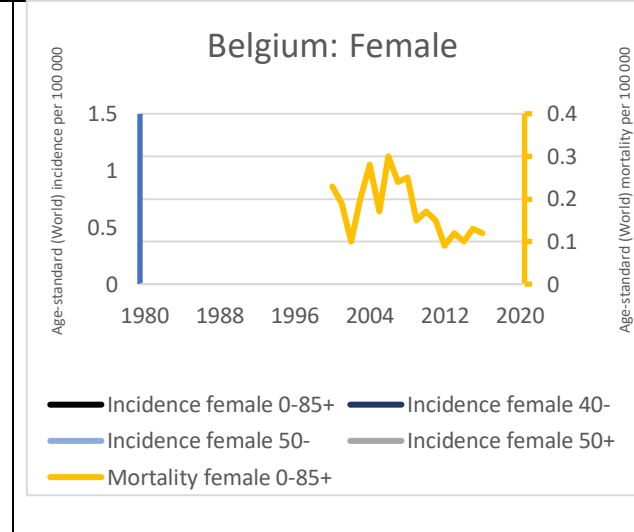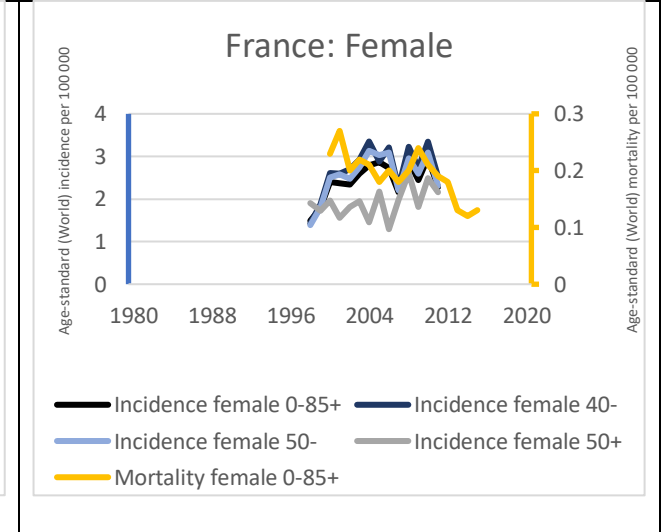

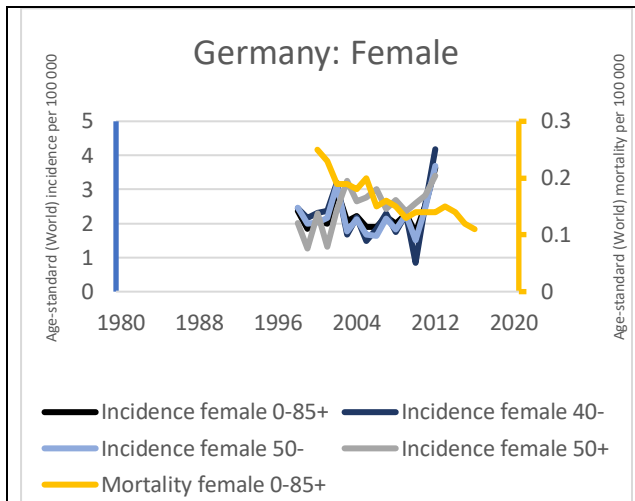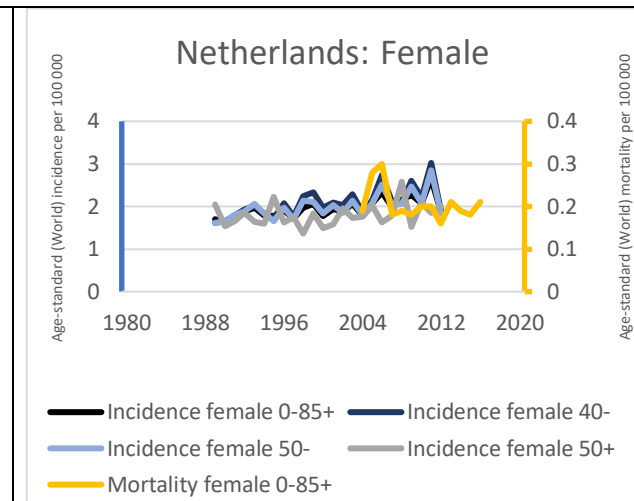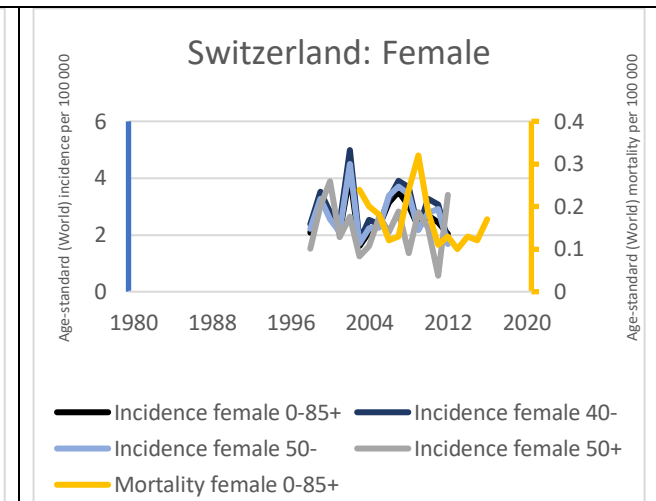

## Southern Europe

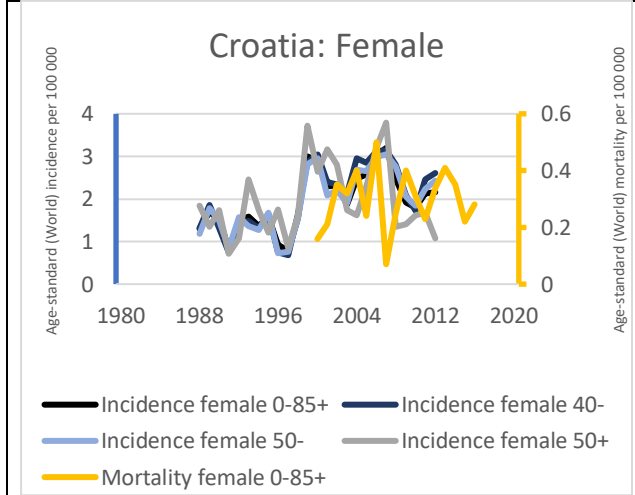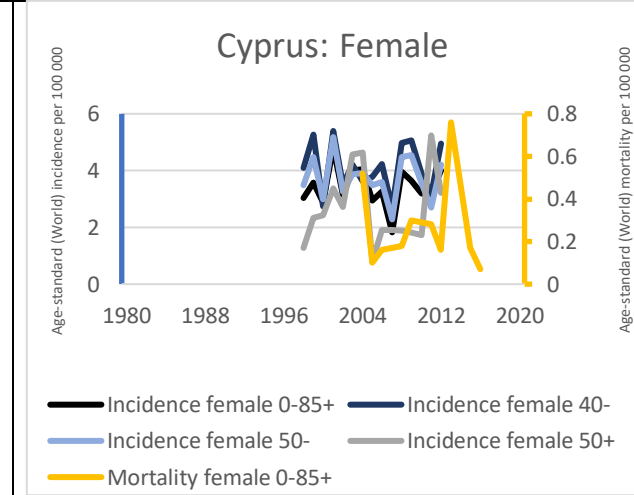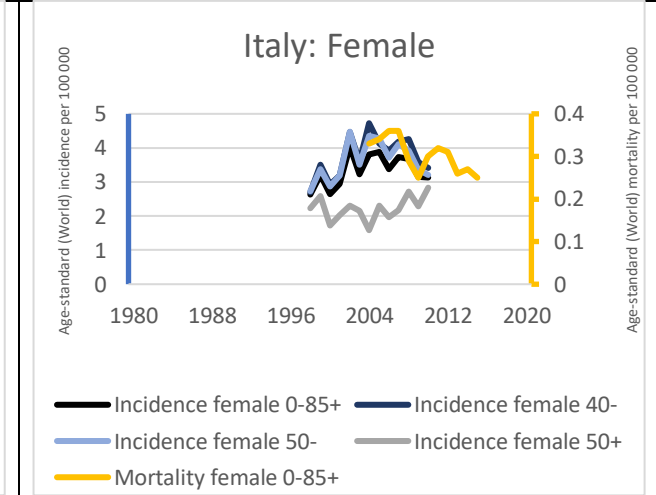

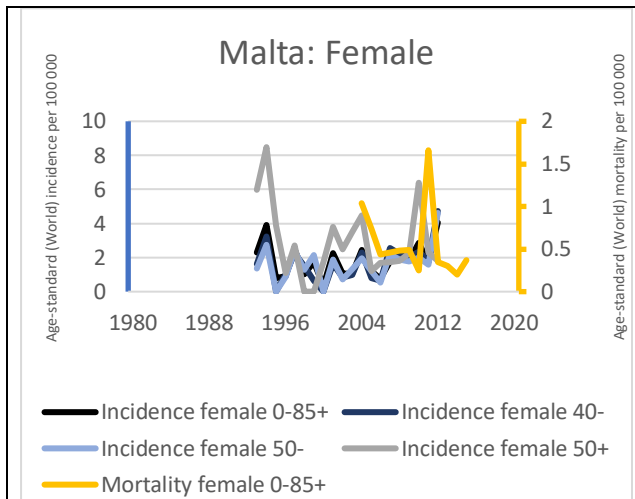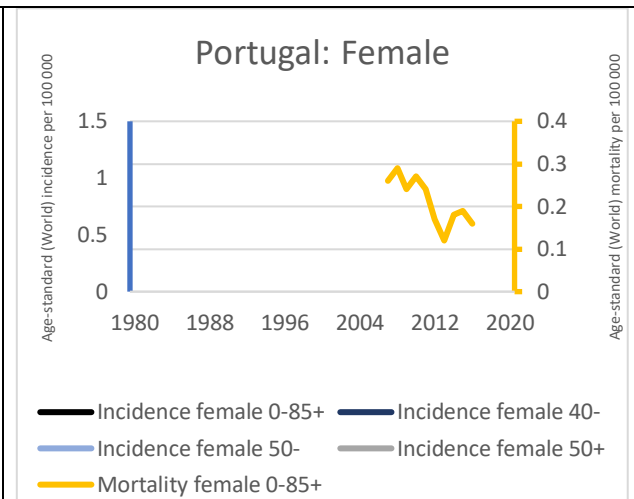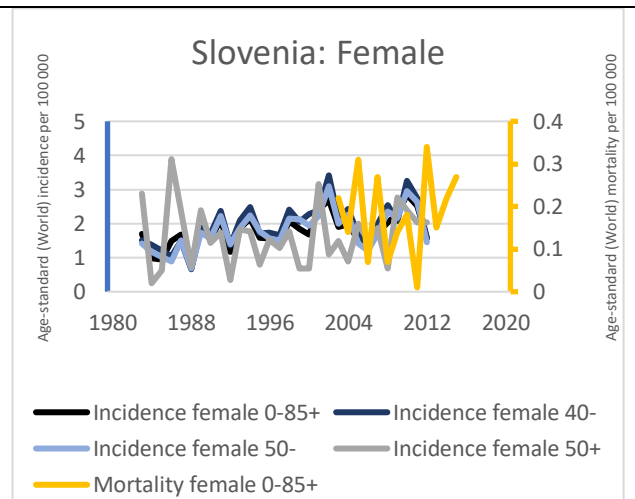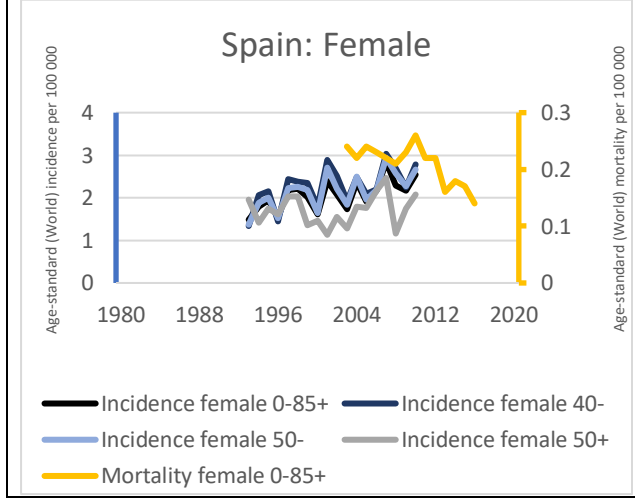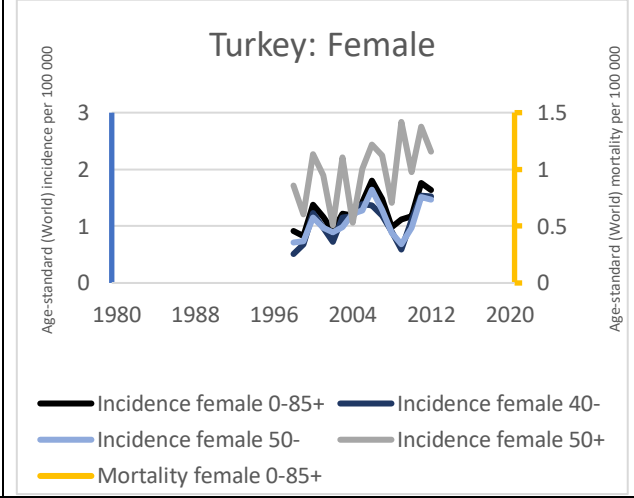

## Eastern Europe

### Belarus: Female

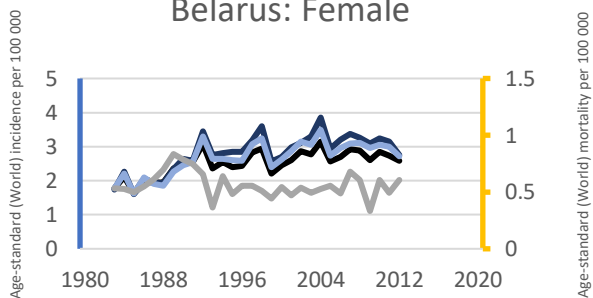

— Incidence female 0-85+    — Incidence female 40-  
— Incidence female 50-    — Incidence female 50+  
— Mortality female 0-85+

### Bulgaria: Female

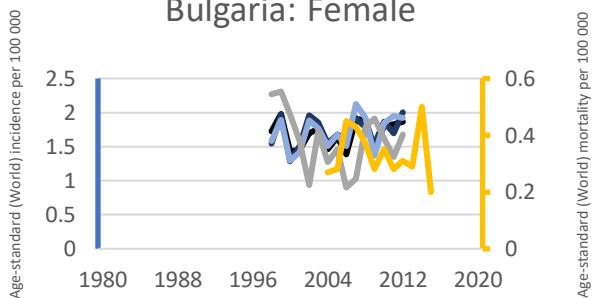

— Incidence female 0-85+    — Incidence female 40-  
— Incidence female 50-    — Incidence female 50+  
— Mortality female 0-85+

### Czech Republic: Female

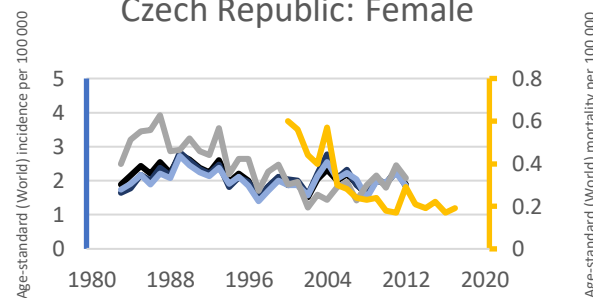

— Incidence female 0-85+    — Incidence female 40-  
— Incidence female 50-    — Incidence female 50+  
— Mortality female 0-85+

### Poland: Female

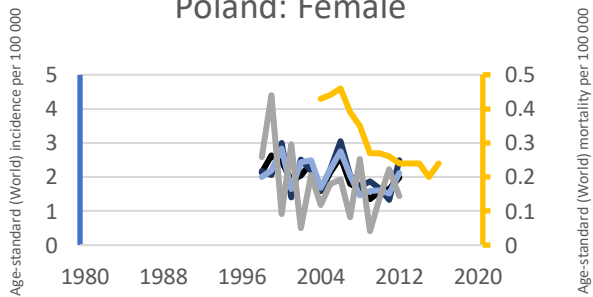

— Incidence female 0-85+    — Incidence female 40-  
— Incidence female 50-    — Incidence female 50+  
— Mortality female 0-85+

### Slovakia: Female

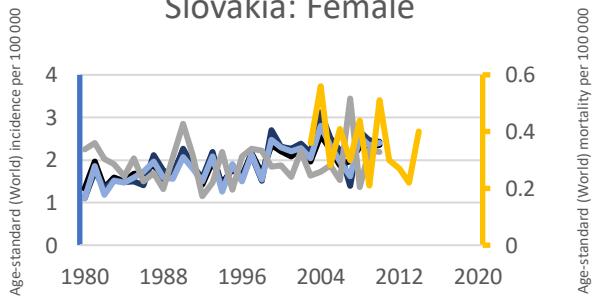

— Incidence female 0-85+    — Incidence female 40-  
— Incidence female 50-    — Incidence female 50+  
— Mortality female 0-85+

# Africa

## Uganda: Female

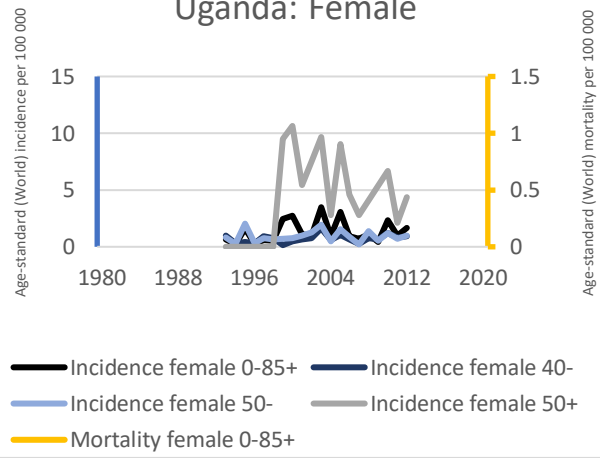

# Supplementary Figure 4. Results of joinpoint regression for individual countries

## a.) Incidence male all ages

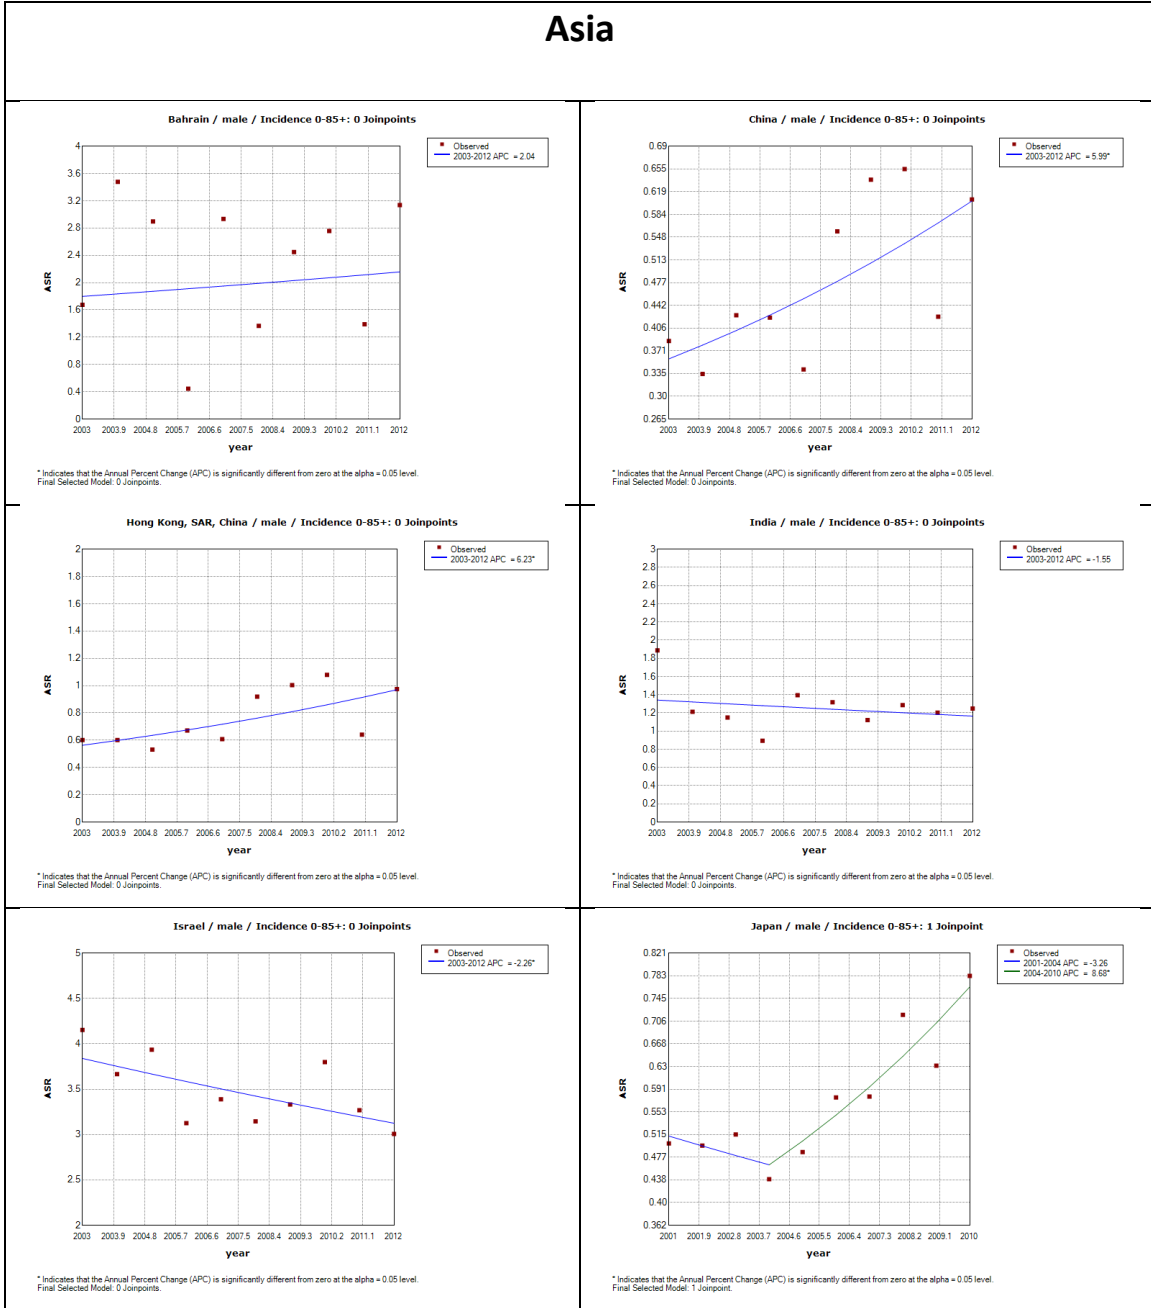

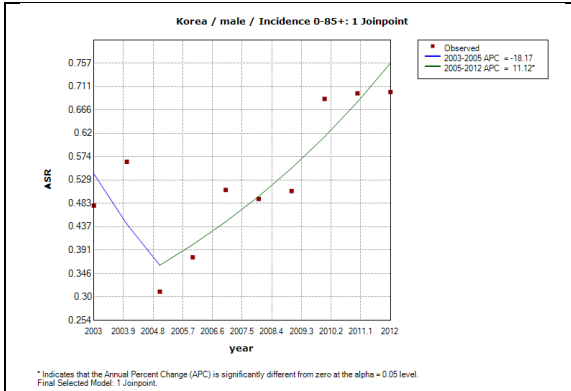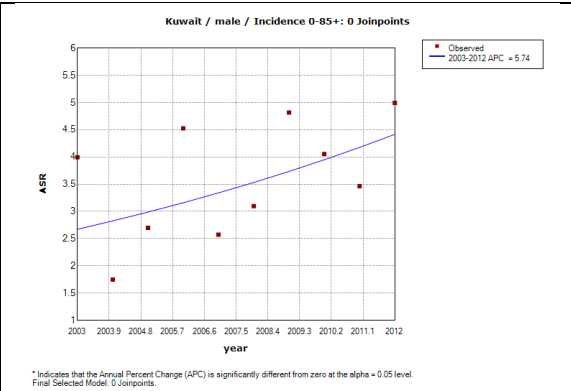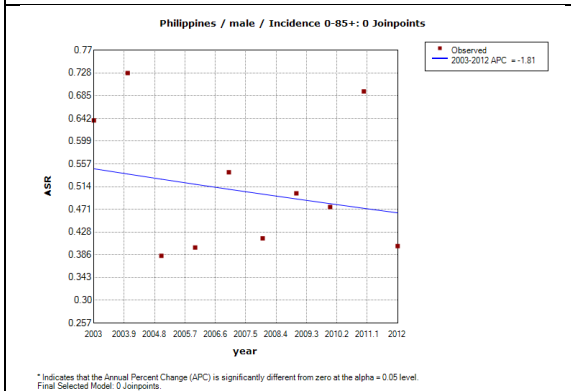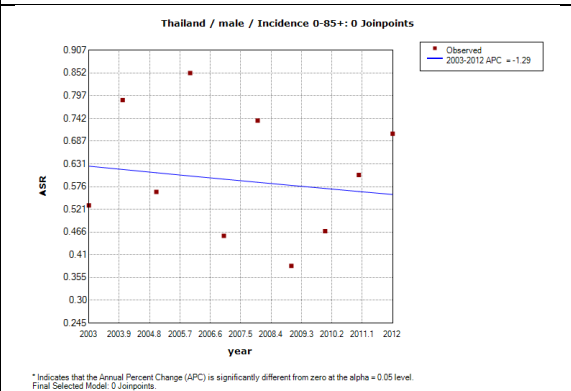

## Oceania

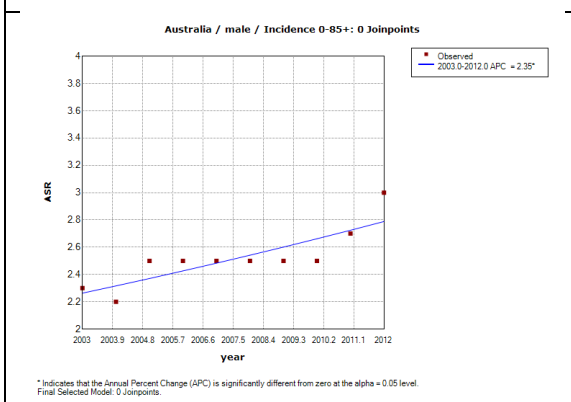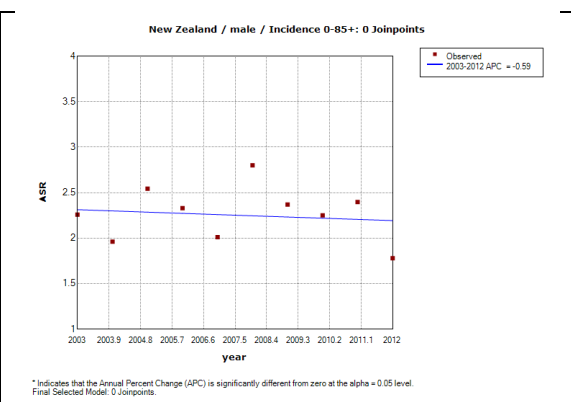

# North America

Canada / male / Incidence 0-85+: 0 Joinpoints

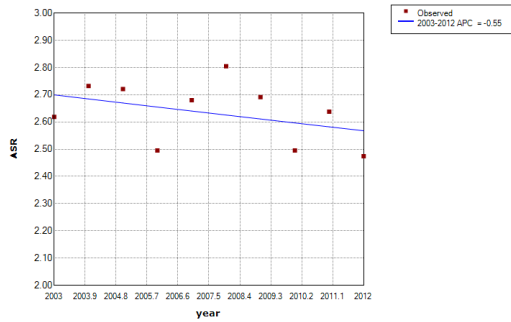

\* Indicates that the Annual Percent Change (APC) is significantly different from zero at the alpha = 0.05 level. Final Selected Model: 0 Joinpoints.

USA / male / Incidence 0-85+: 1 Joinpoint

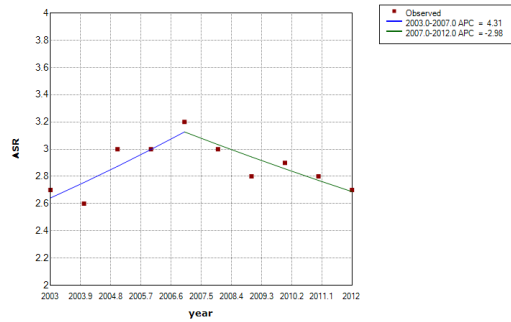

\* Indicates that the Annual Percent Change (APC) is significantly different from zero at the alpha = 0.05 level. Final Selected Model: 1 Joinpoint.

USA Black / male / Incidence 0-85+: 1 Joinpoint

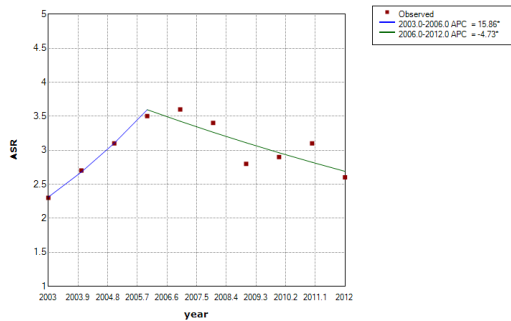

\* Indicates that the Annual Percent Change (APC) is significantly different from zero at the alpha = 0.05 level. Final Selected Model: 1 Joinpoint.

USA White / male / Incidence 0-85+: 0 Joinpoints

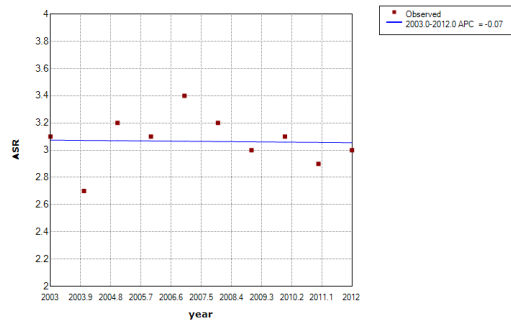

\* Indicates that the Annual Percent Change (APC) is significantly different from zero at the alpha = 0.05 level. Final Selected Model: 0 Joinpoints.

# South America

Brazil / male / Incidence 0-85+: 0 Joinpoints

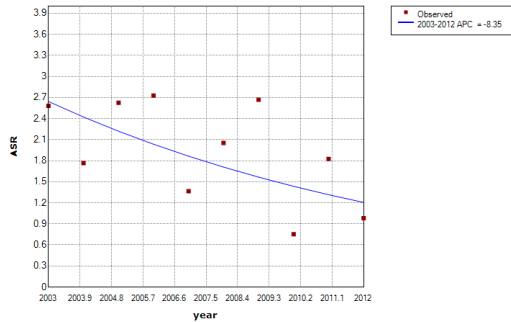

\* Indicates that the Annual Percent Change (APC) is significantly different from zero at the alpha = 0.05 level. Final Selected Model: 0 Joinpoints.

Chile / male / Incidence 0-85+: 0 Joinpoints

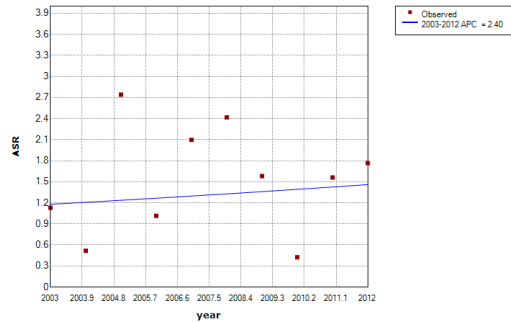

\* Indicates that the Annual Percent Change (APC) is significantly different from zero at the alpha = 0.05 level. Final Selected Model: 0 Joinpoints.



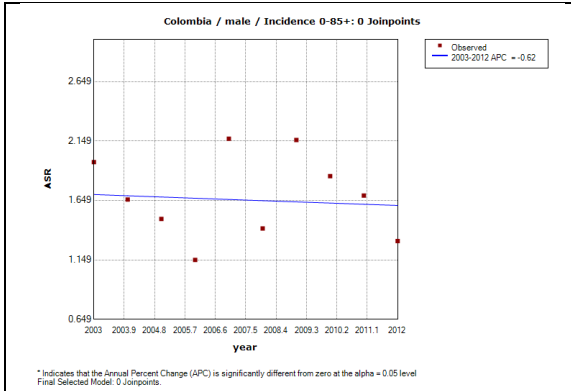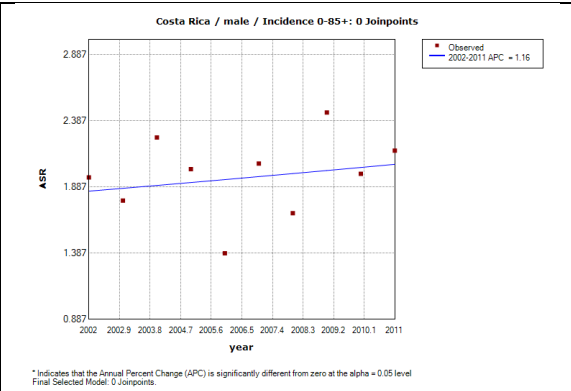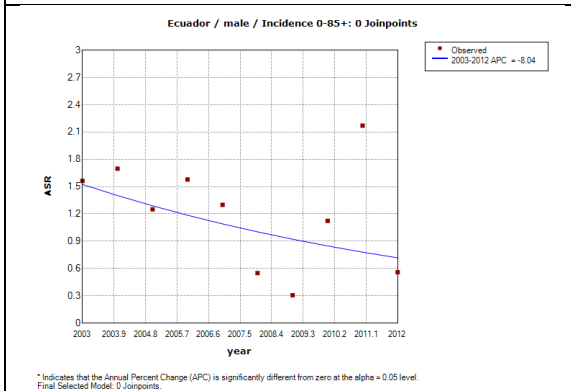

## Northern Europe

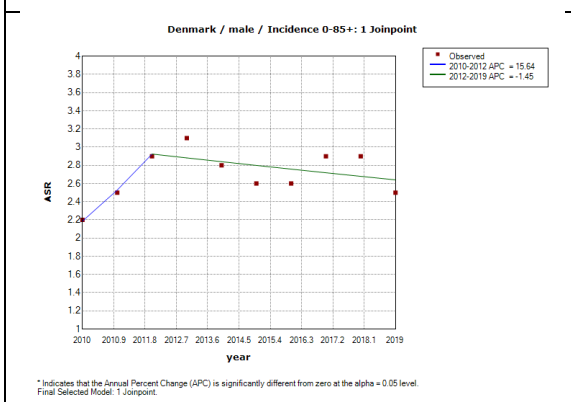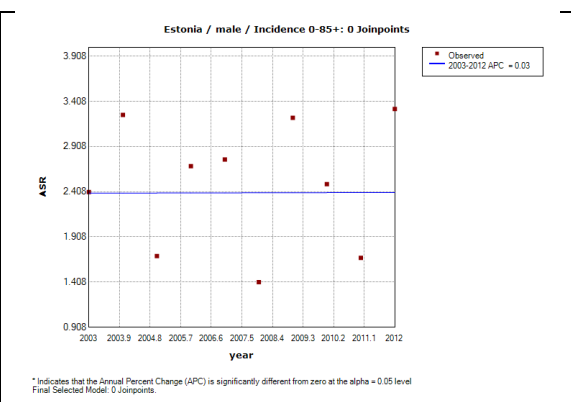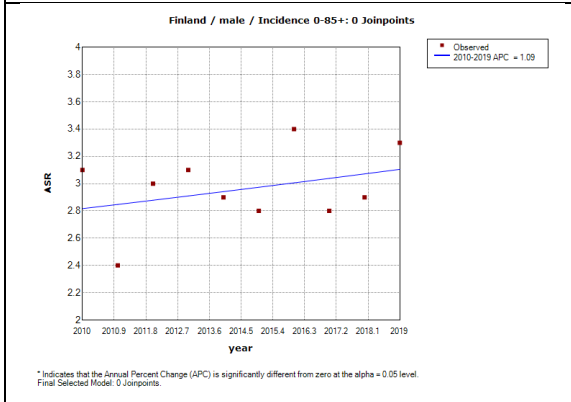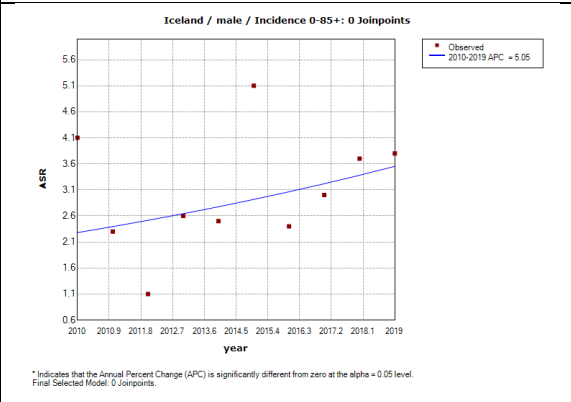

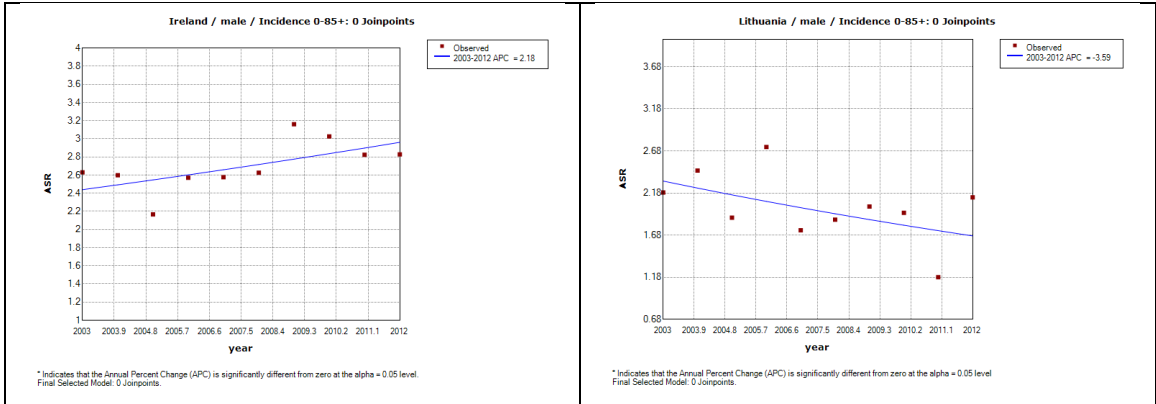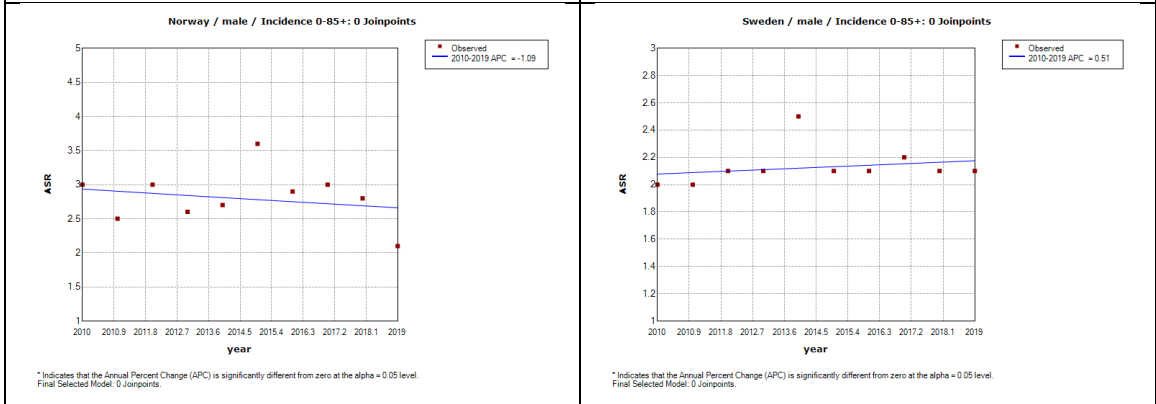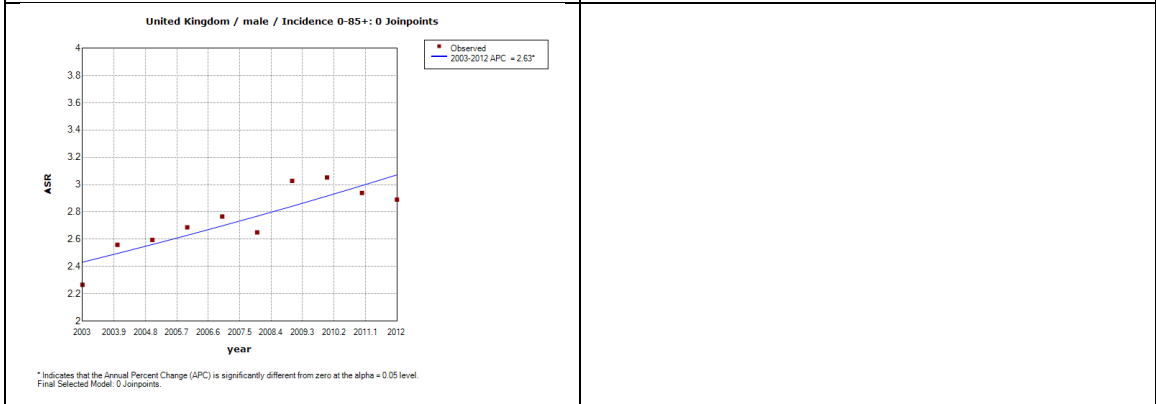

**Western Europe**

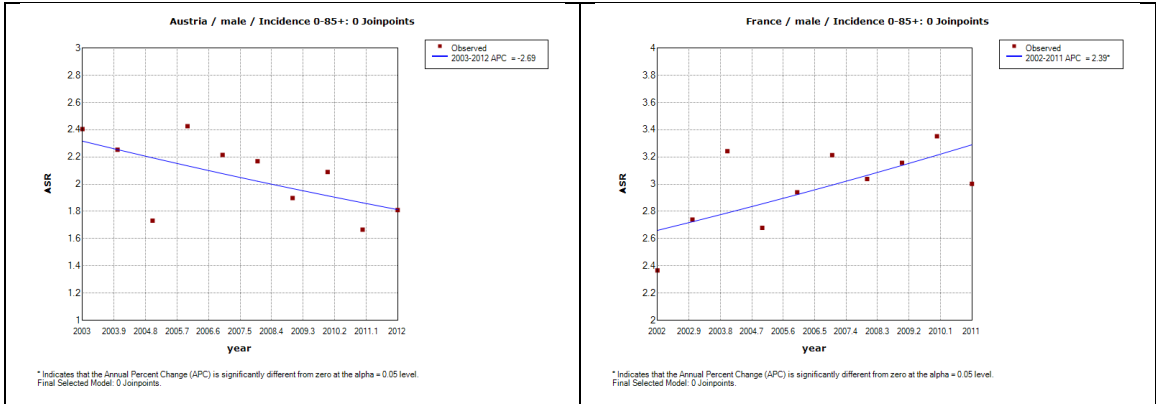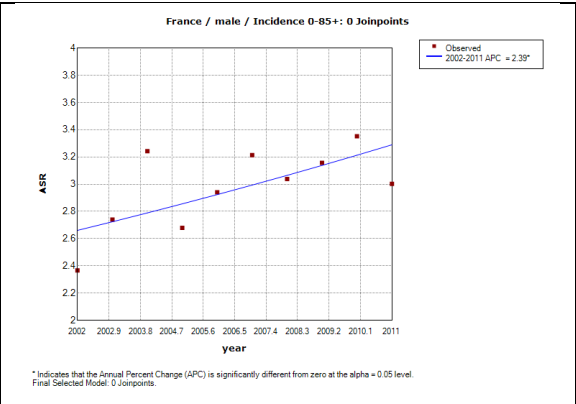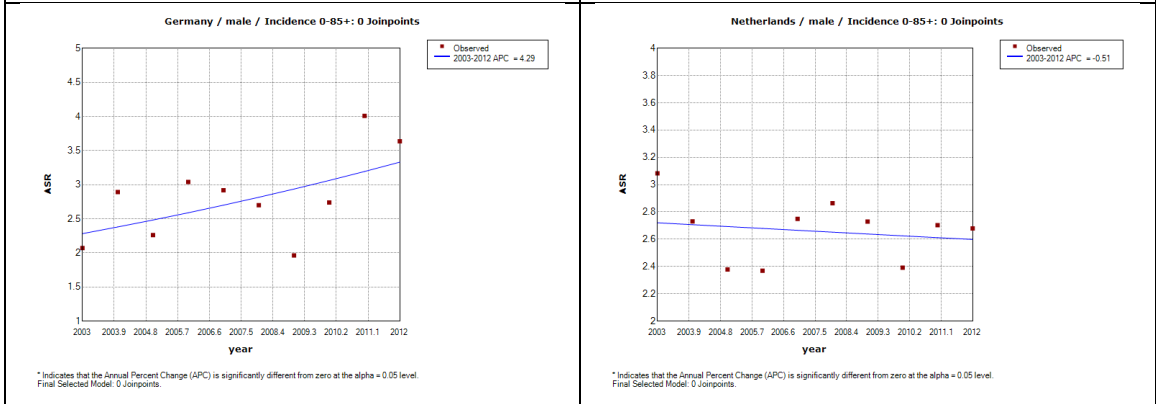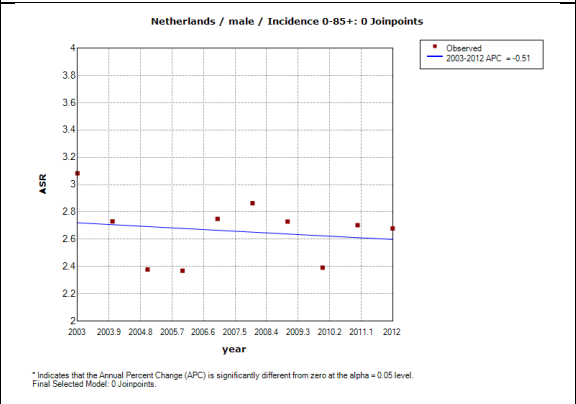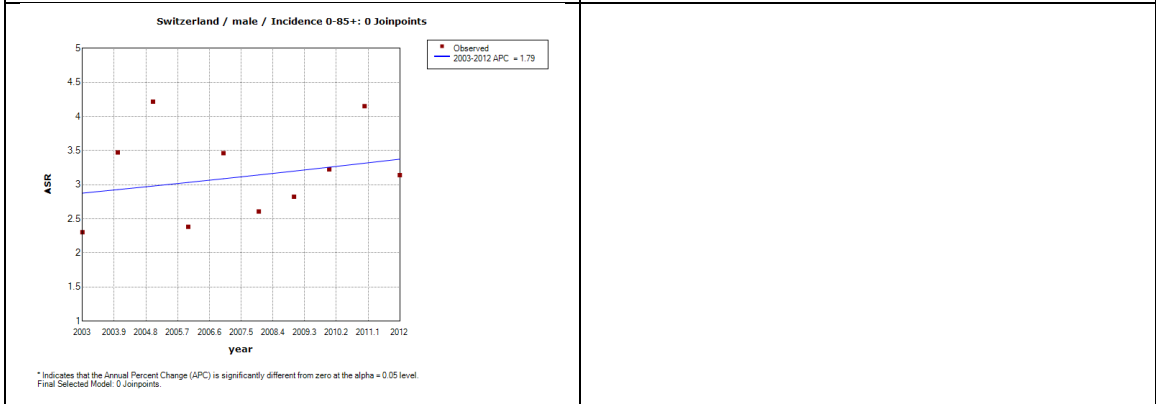

## Southern Europe

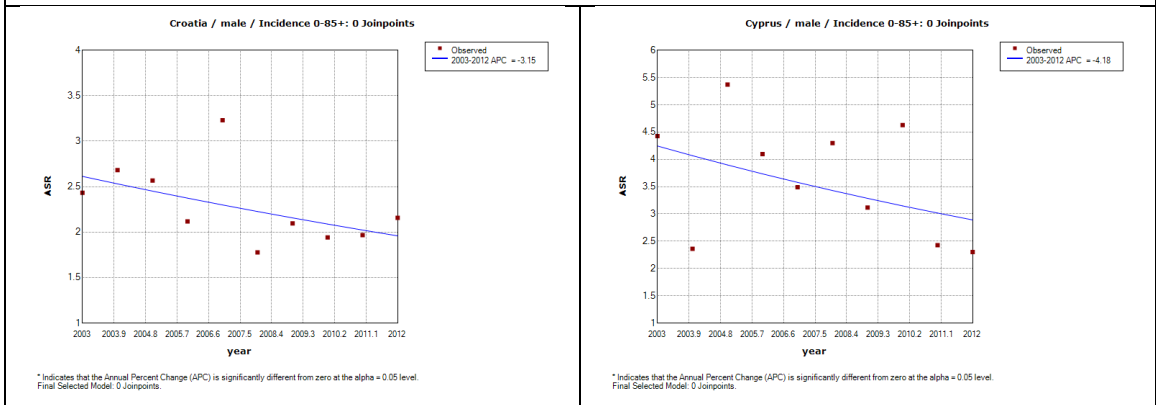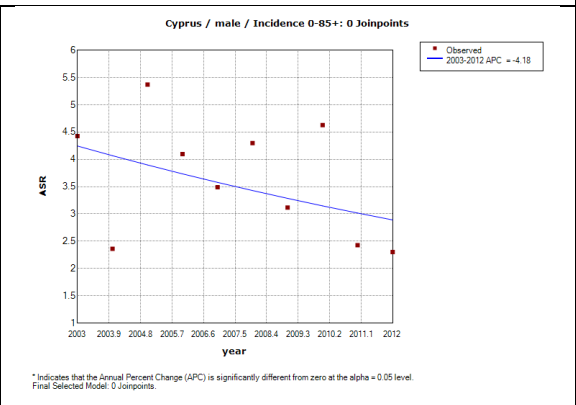

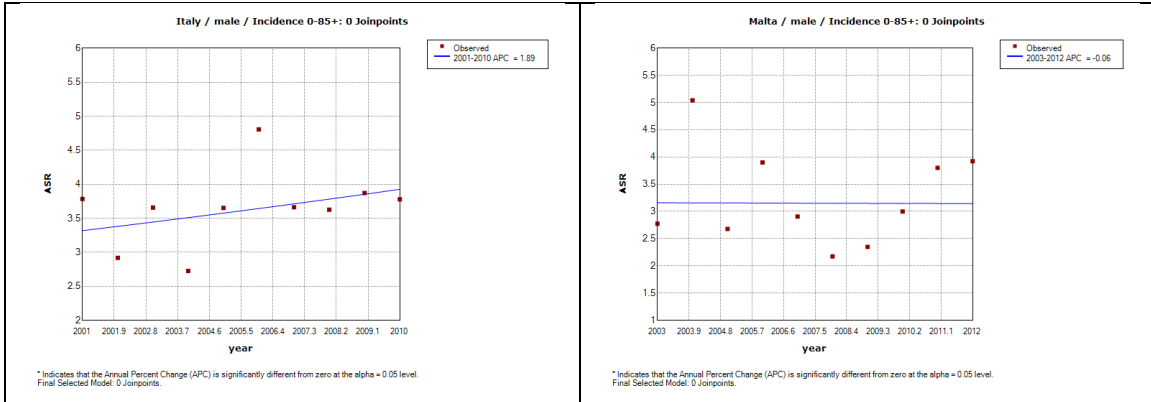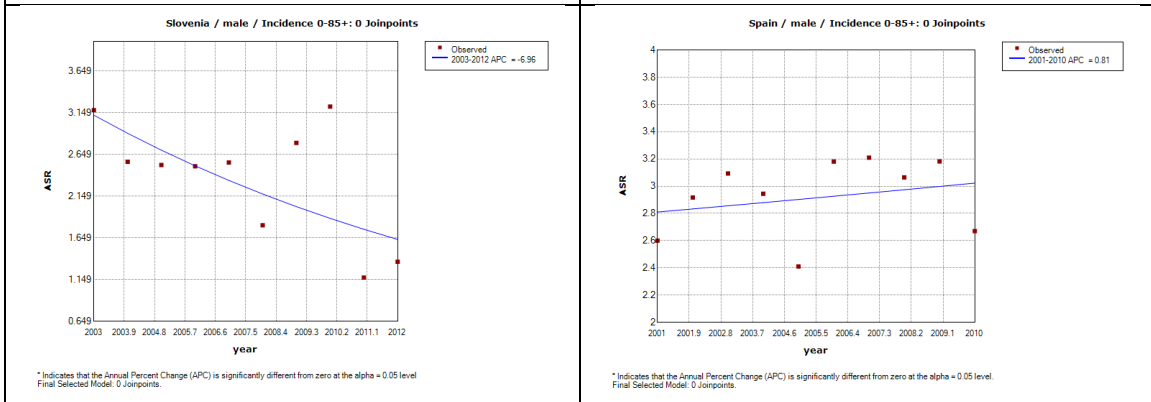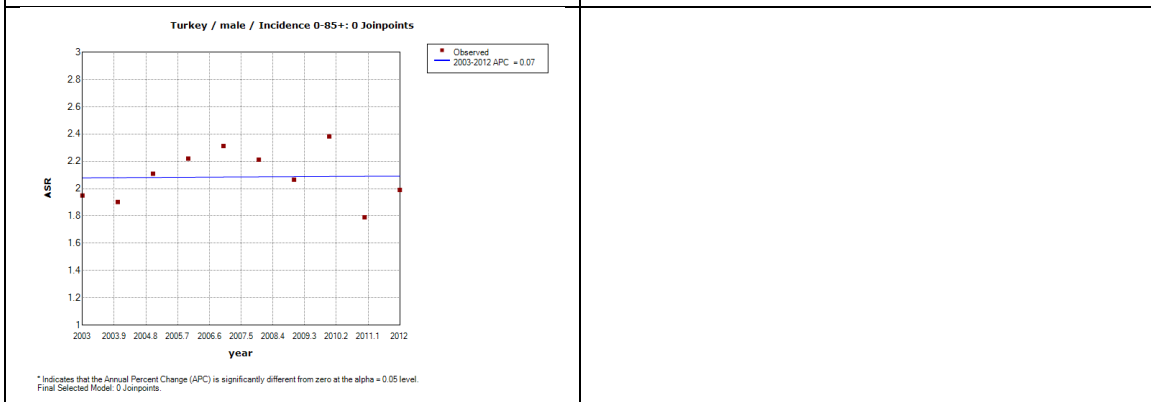

## Eastern Europe

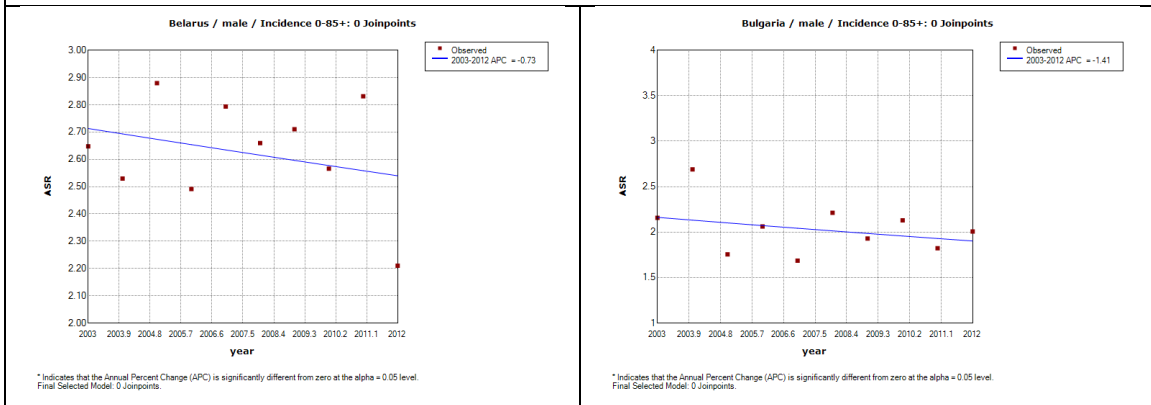

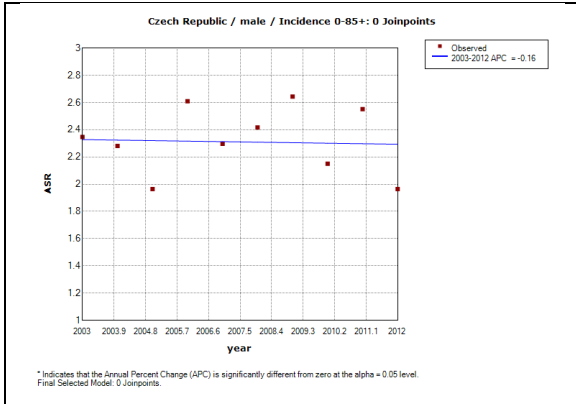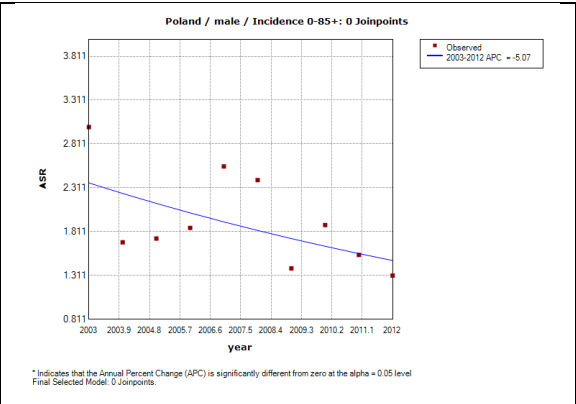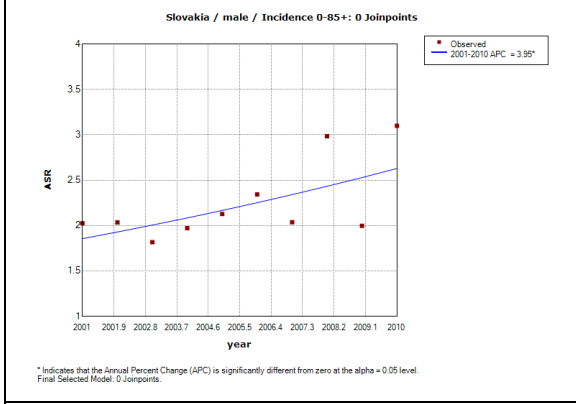

## Africa

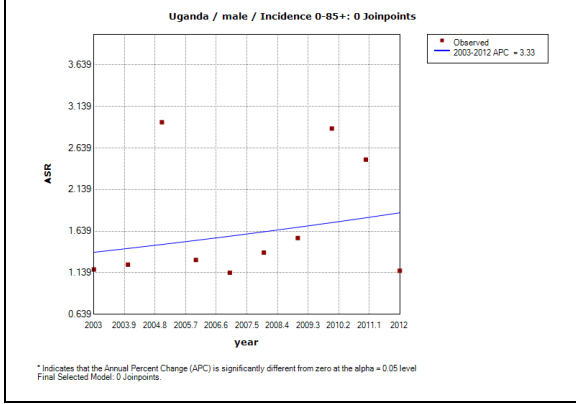

b.) Incidence female all ages

## Asia

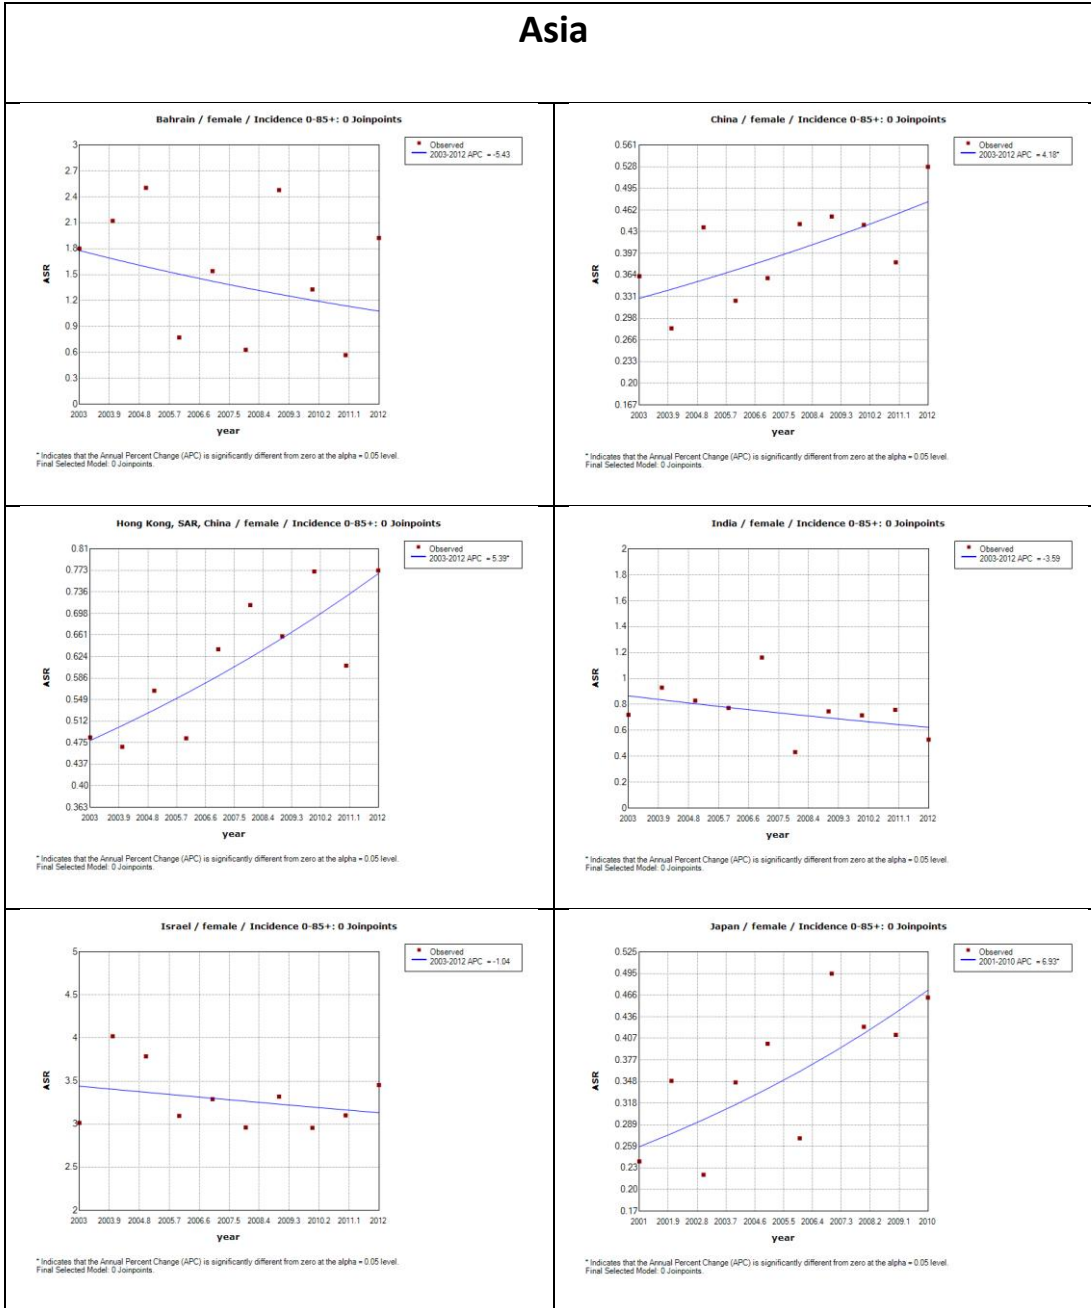

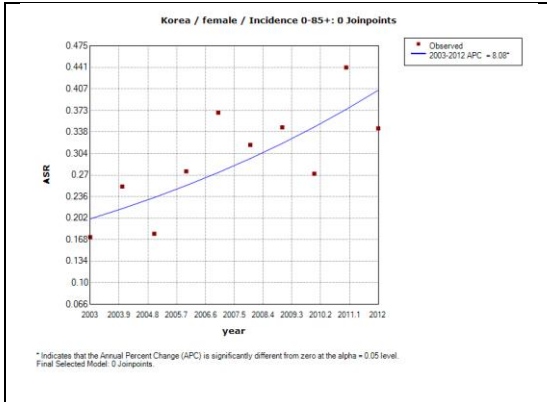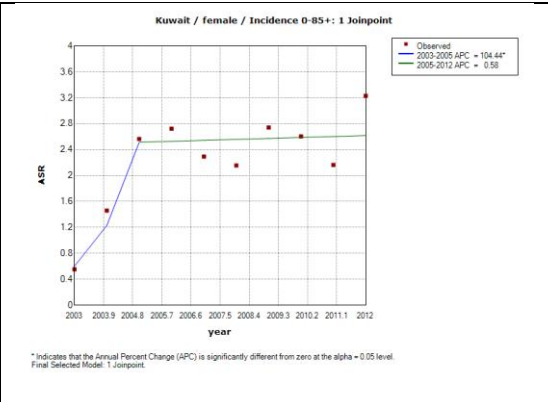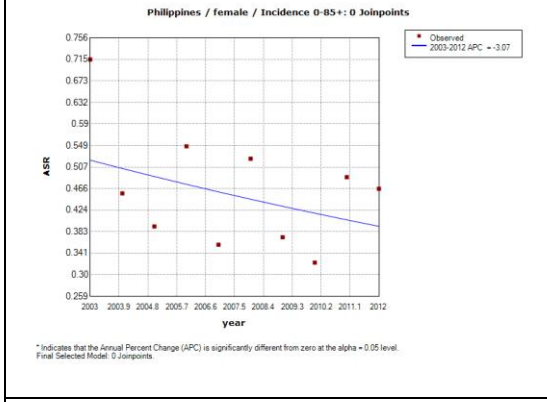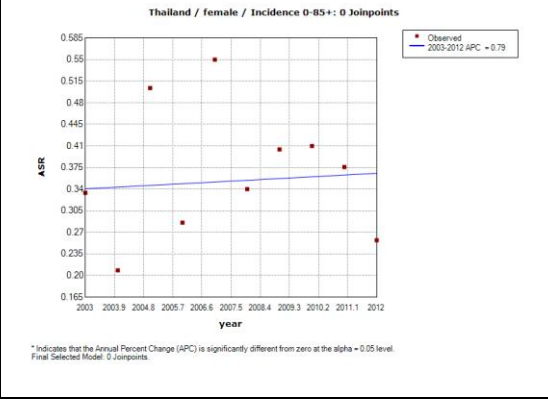

## Oceania

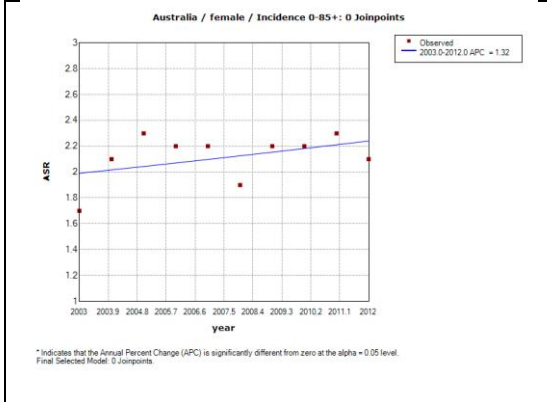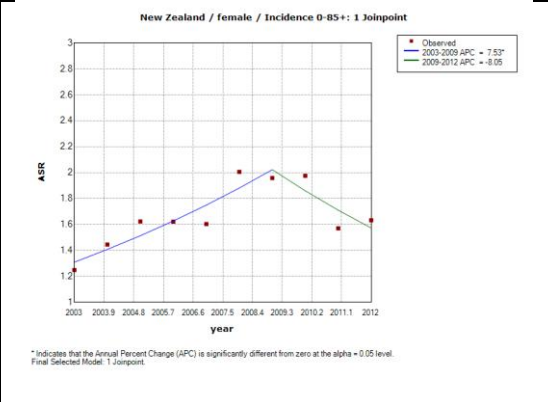

# North America

Canada / female / Incidence 0-85+ : 1 Joinpoint

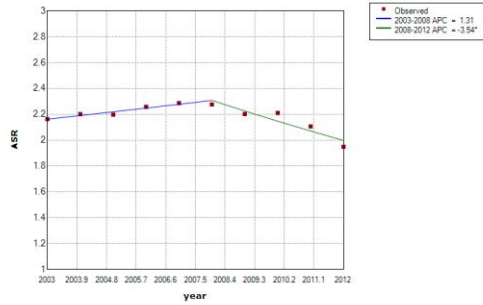

\*Indicates that the Annual Percent Change (APC) is significantly different from zero at the alpha = 0.05 level.  
Final Selected Model: 1 Joinpoint.

USA / female / Incidence 0-85+ : 1 Joinpoint

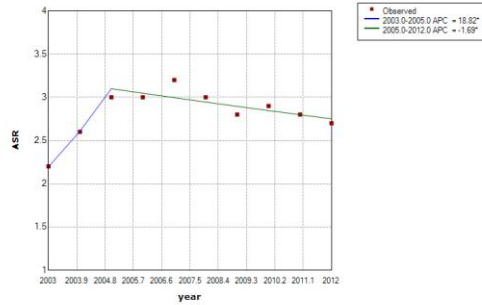

\*Indicates that the Annual Percent Change (APC) is significantly different from zero at the alpha = 0.05 level.  
Final Selected Model: 1 Joinpoint.

USA Black / female / Incidence 0-85+ : 0 Joinpoints

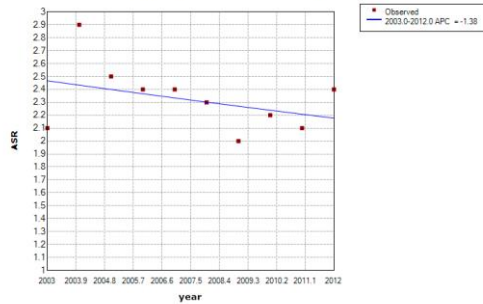

\*Indicates that the Annual Percent Change (APC) is significantly different from zero at the alpha = 0.05 level.  
Final Selected Model: 0 Joinpoints.

USA White / female / Incidence 0-85+ : 0 Joinpoints

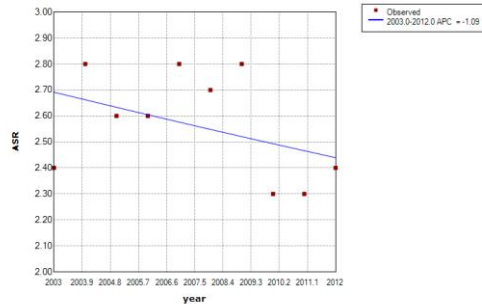

\*Indicates that the Annual Percent Change (APC) is significantly different from zero at the alpha = 0.05 level.  
Final Selected Model: 0 Joinpoints.

# South America

Brazil / female / Incidence 0-85+ : 0 Joinpoints

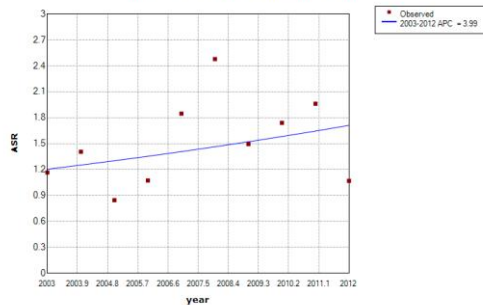

\*Indicates that the Annual Percent Change (APC) is significantly different from zero at the alpha = 0.05 level.  
Final Selected Model: 0 Joinpoints.

Chile / female / Incidence 0-85+ : 0 Joinpoints

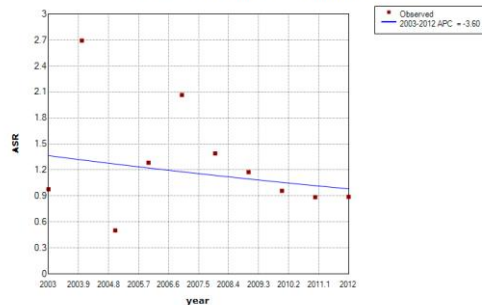

\*Indicates that the Annual Percent Change (APC) is significantly different from zero at the alpha = 0.05 level.  
Final Selected Model: 0 Joinpoints.



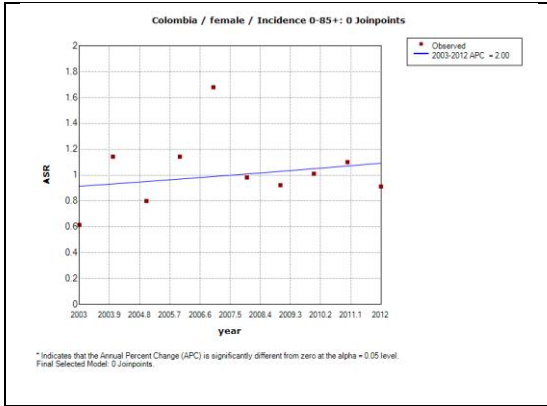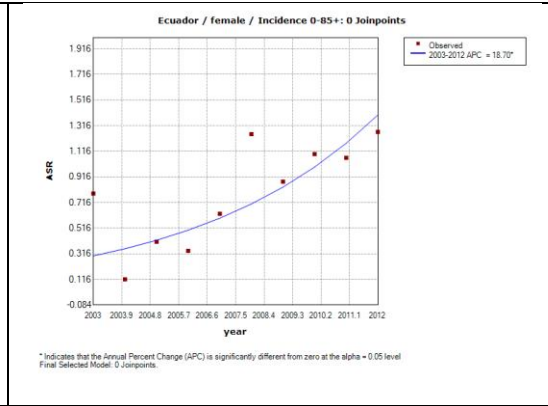

## Northern Europe

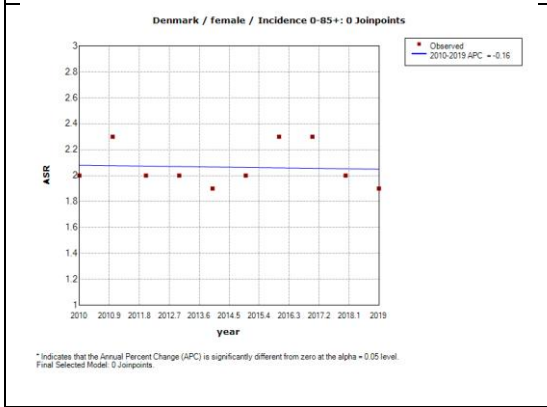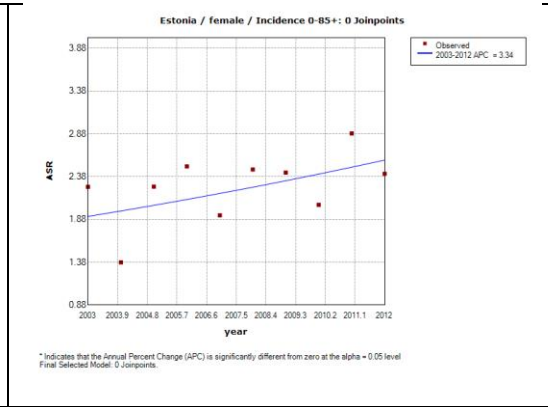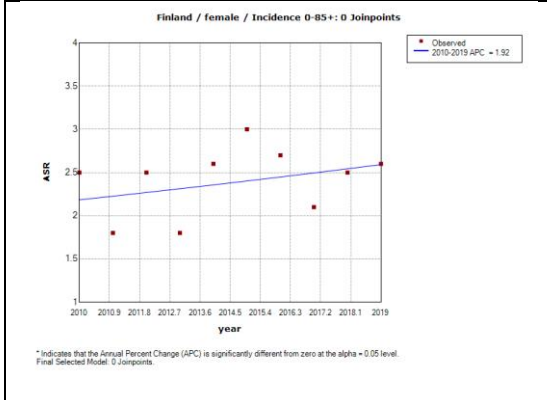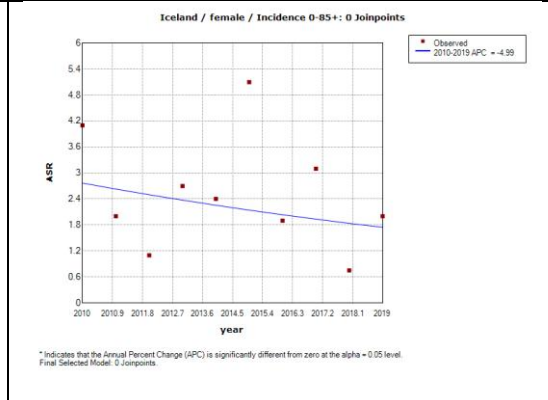

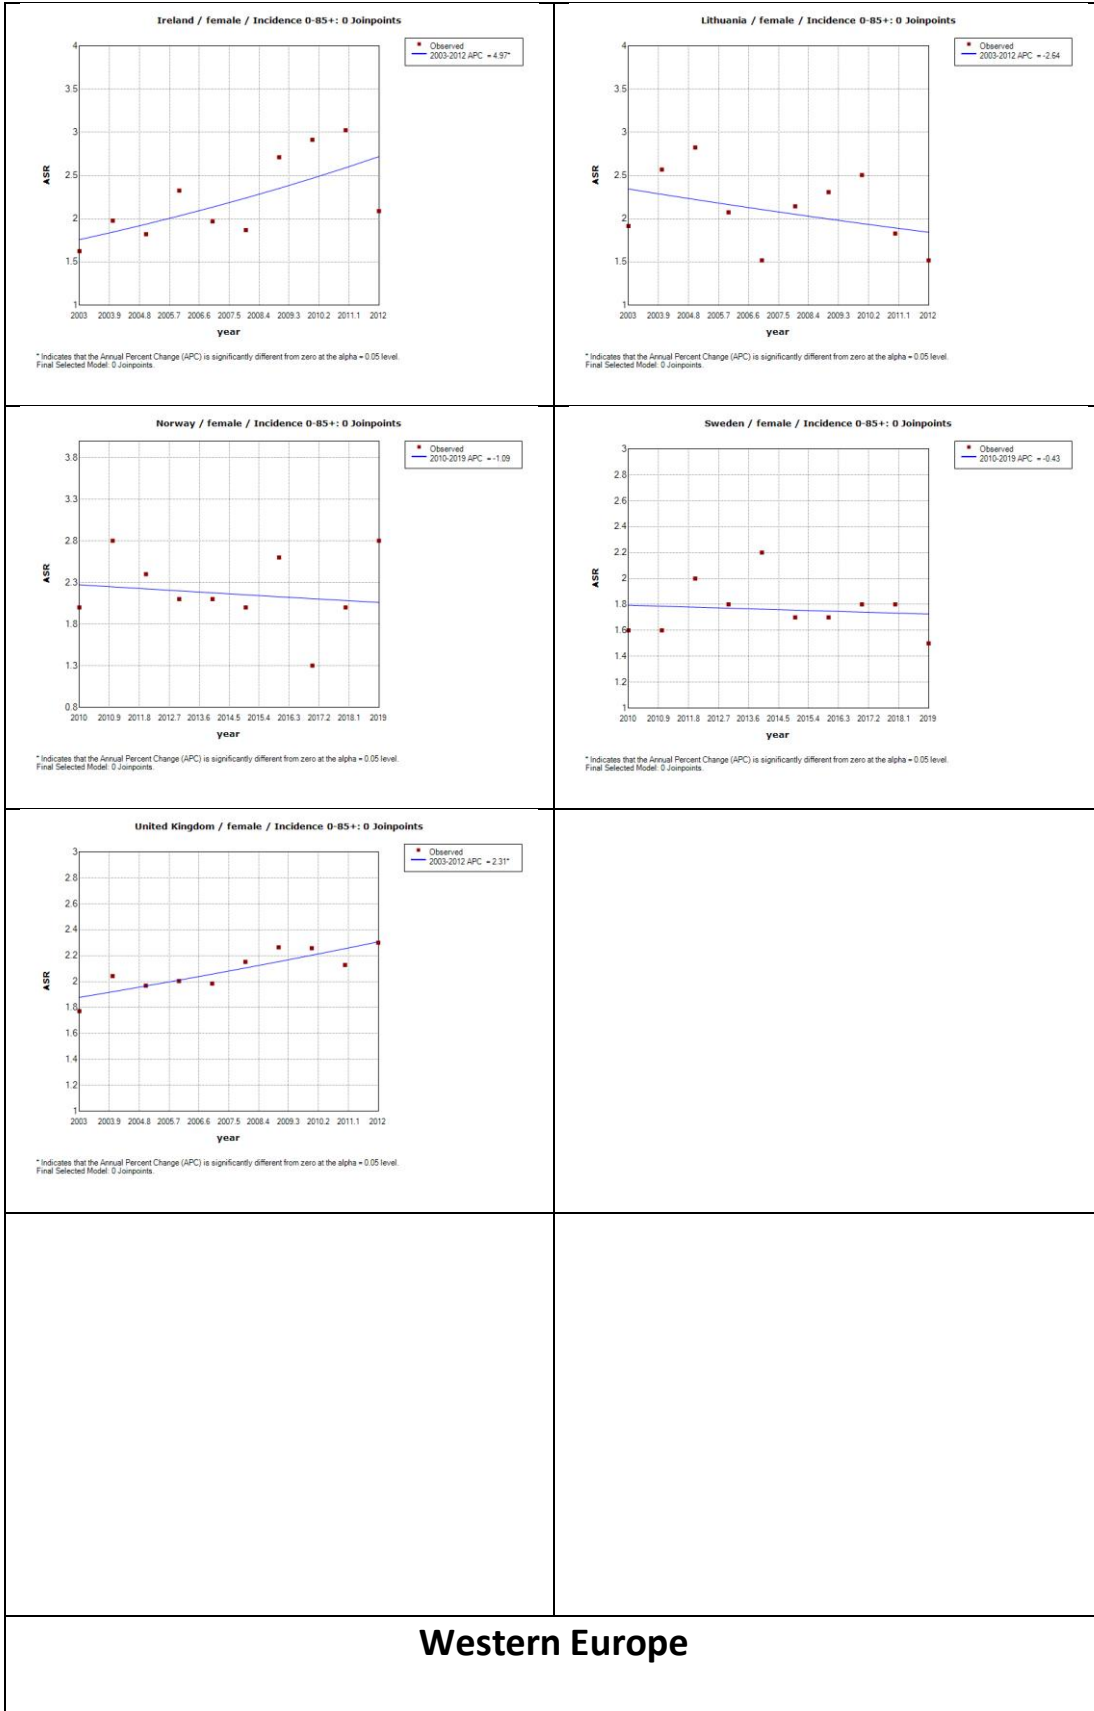

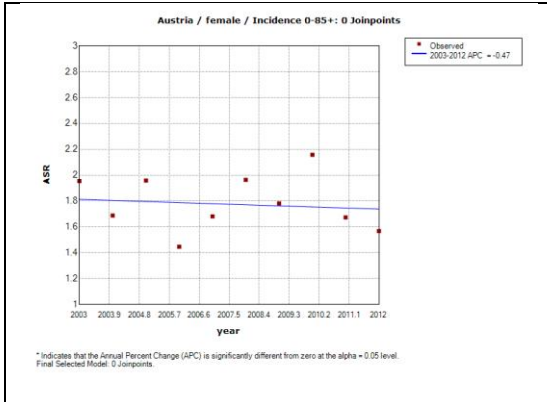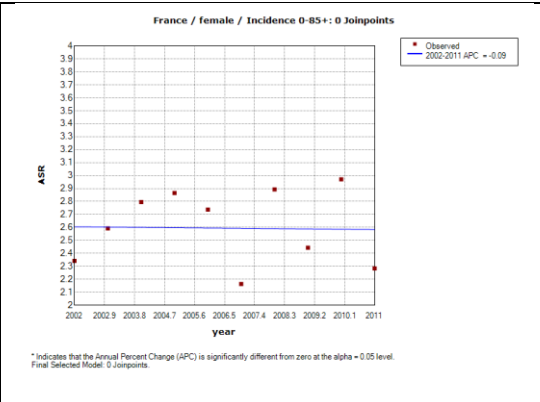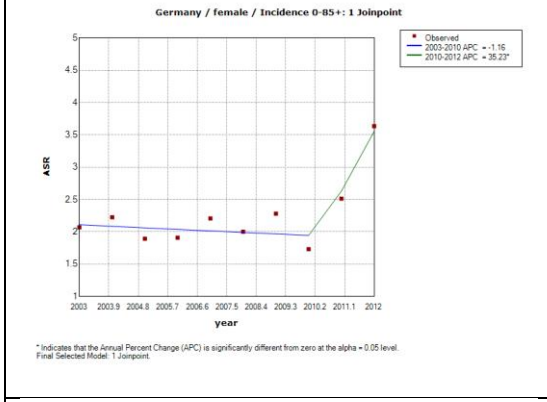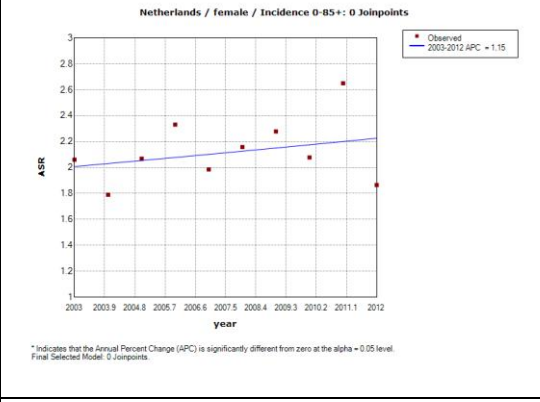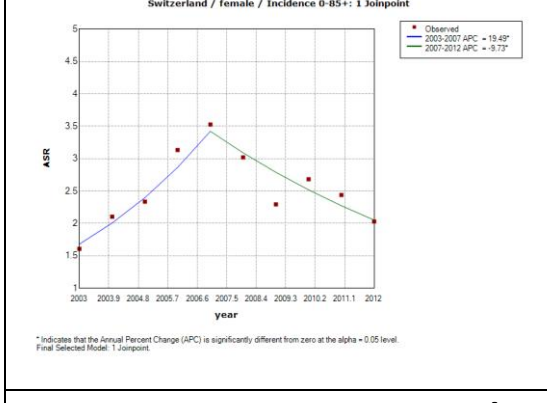

## Southern Europe

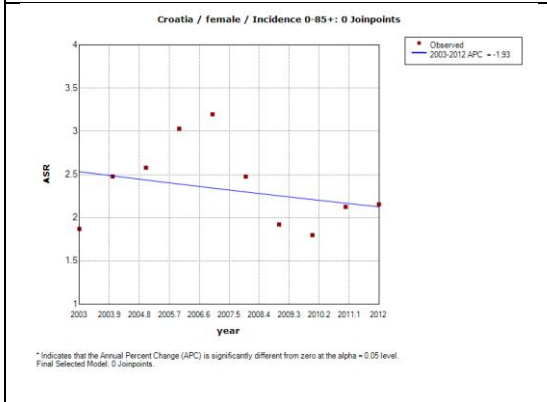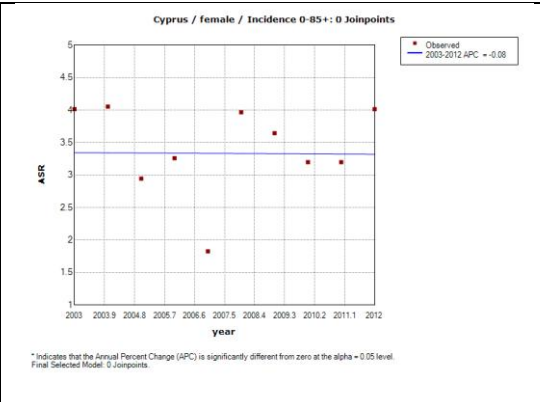

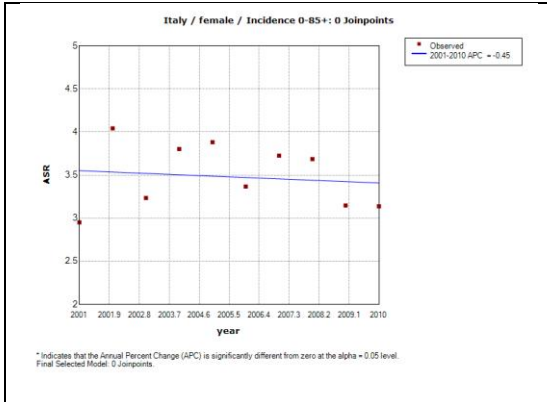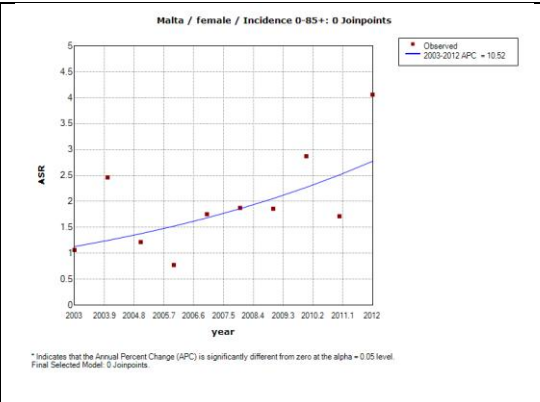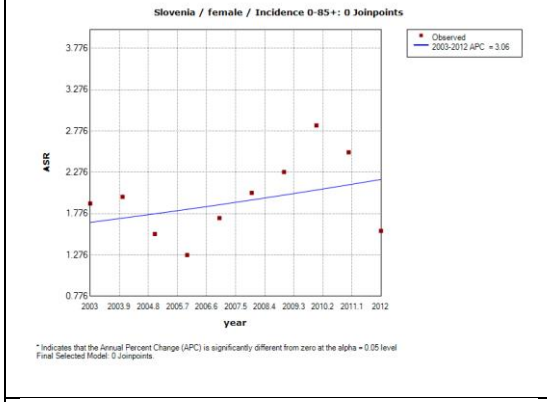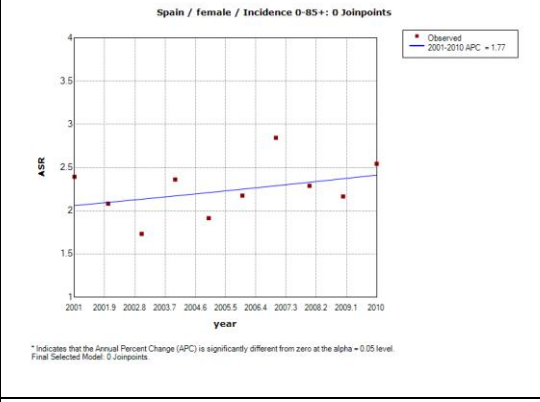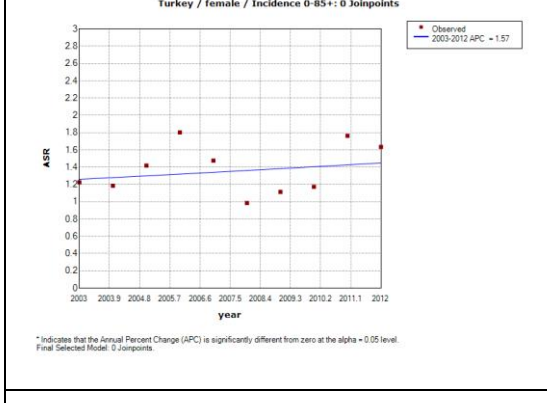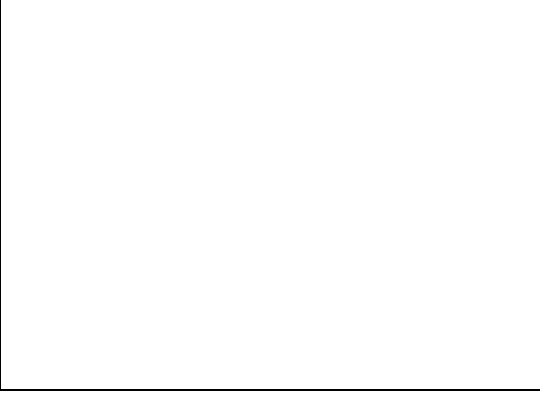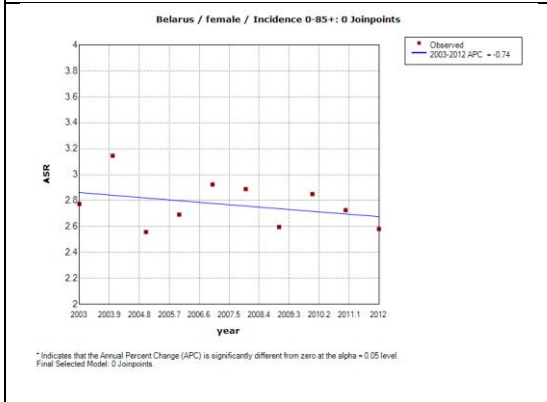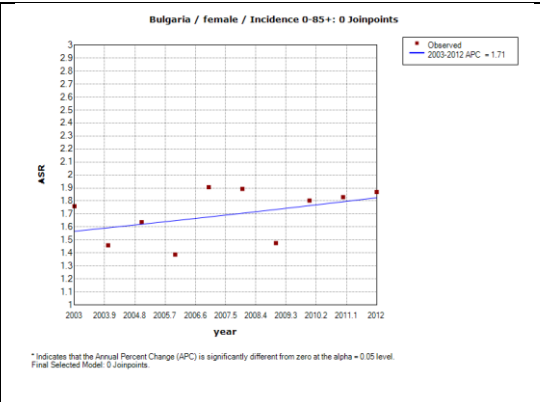

Czech Republic / female / Incidence 0-85+ : 0 Joinpoints

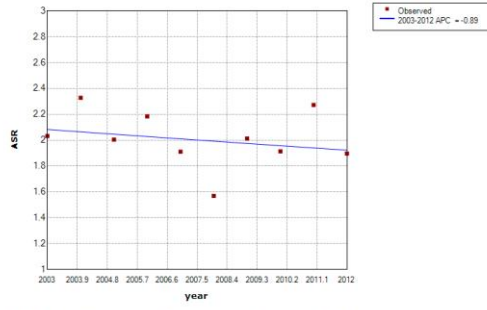

\* Indicates that the Annual Percent Change (APC) is significantly different from zero at the alpha = 0.05 level. Final Selected Model: 0 Joinpoints.

Poland / female / Incidence 0-85+ : 0 Joinpoints

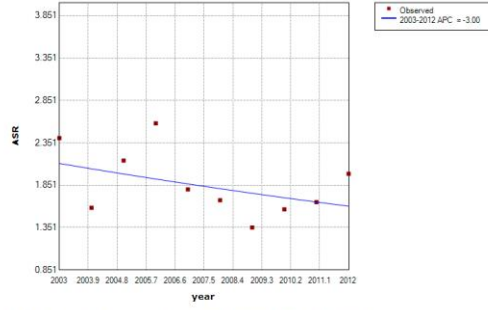

\* Indicates that the Annual Percent Change (APC) is significantly different from zero at the alpha = 0.05 level. Final Selected Model: 0 Joinpoints.

Slovakia / female / Incidence 0-85+ : 0 Joinpoints

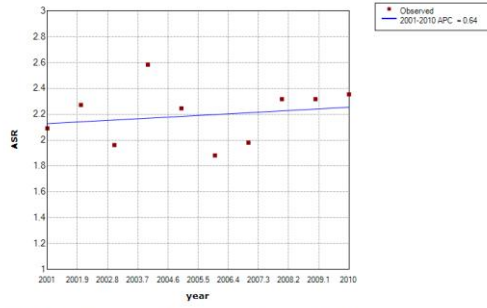

\* Indicates that the Annual Percent Change (APC) is significantly different from zero at the alpha = 0.05 level. Final Selected Model: 0 Joinpoints.

## Africa

Uganda / female / Incidence 0-85+ : 0 Joinpoints

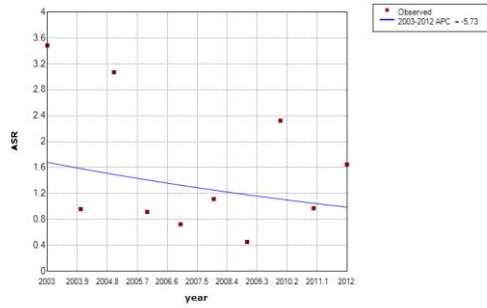

\* Indicates that the Annual Percent Change (APC) is significantly different from zero at the alpha = 0.05 level. Final Selected Model: 0 Joinpoints.

c.) Incidence male below 40 years old

## Asia

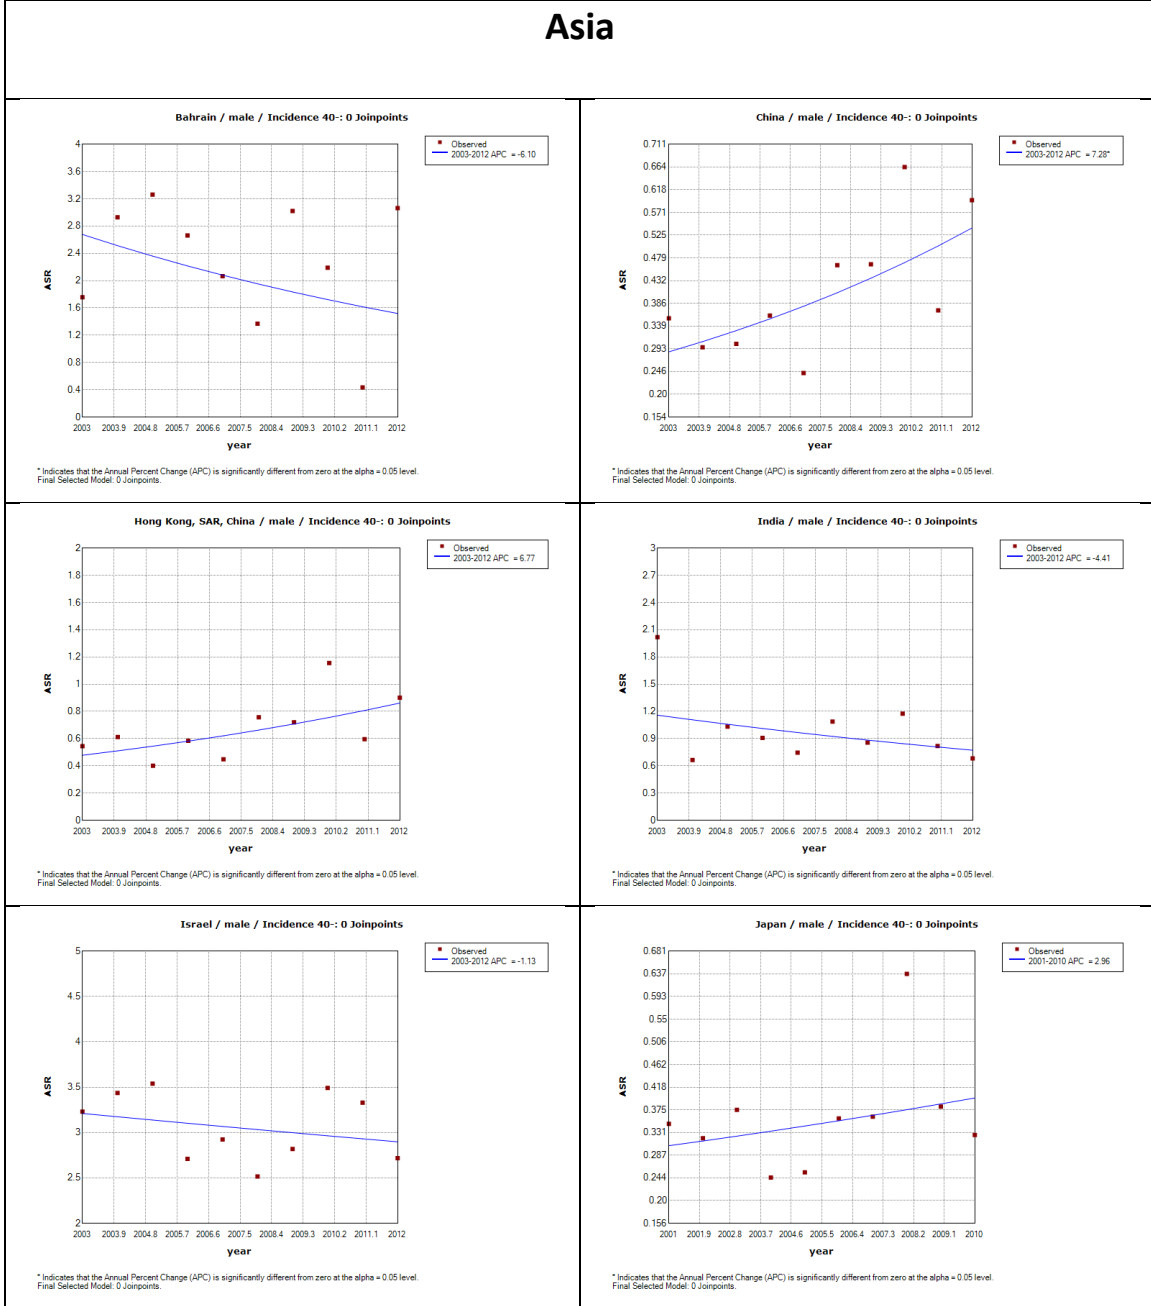

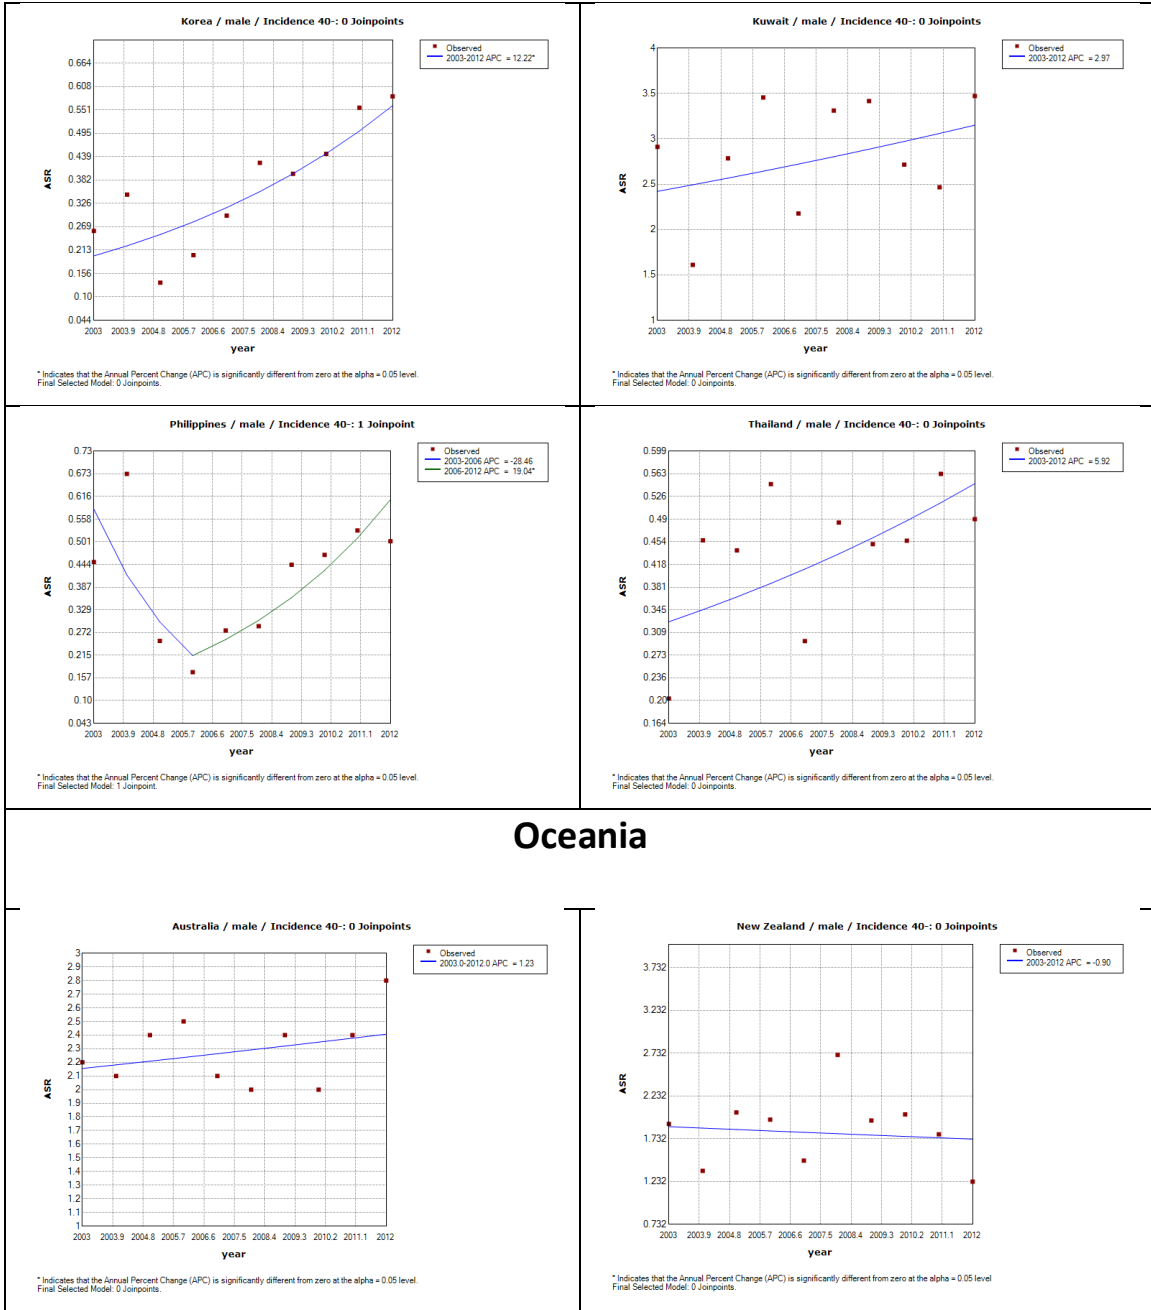

# North America

Canada / male / Incidence 40-: 0 Joinpoints

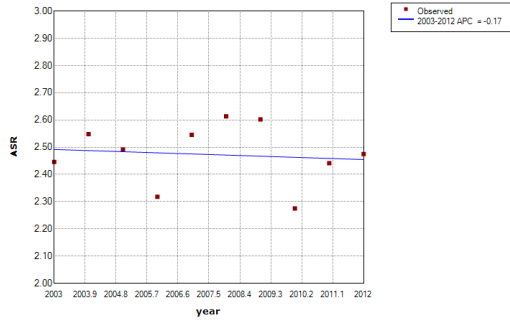

\* Indicates that the Annual Percent Change (APC) is significantly different from zero at the alpha = 0.05 level. Final Selected Model: 0 Joinpoints.

USA / male / Incidence 40-: 0 Joinpoints

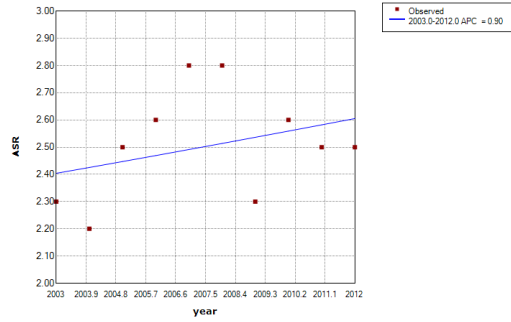

\* Indicates that the Annual Percent Change (APC) is significantly different from zero at the alpha = 0.05 level. Final Selected Model: 0 Joinpoints.

USA Black / male / Incidence 40-: 1 Joinpoint

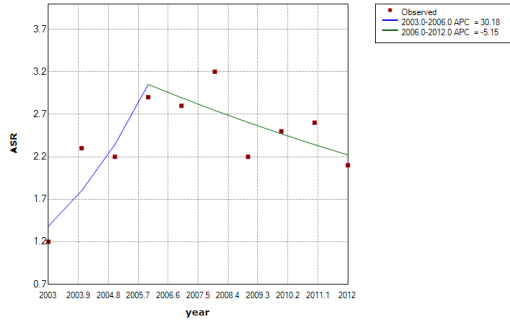

\* Indicates that the Annual Percent Change (APC) is significantly different from zero at the alpha = 0.05 level. Final Selected Model: 1 Joinpoint.

USA White / male / Incidence 40-: 0 Joinpoints

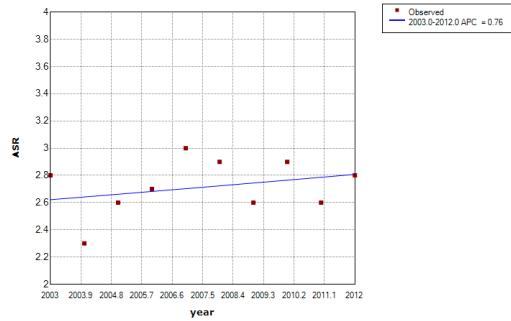

\* Indicates that the Annual Percent Change (APC) is significantly different from zero at the alpha = 0.05 level. Final Selected Model: 0 Joinpoints.

# South America

Brazil / male / Incidence 40-: 0 Joinpoints

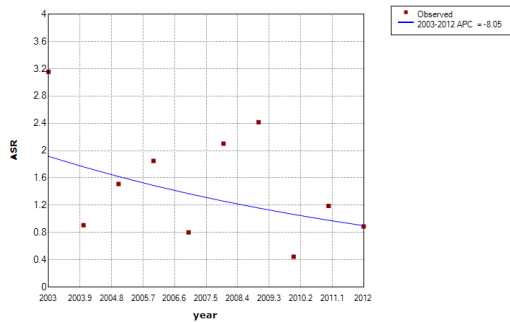

\* Indicates that the Annual Percent Change (APC) is significantly different from zero at the alpha = 0.05 level. Final Selected Model: 0 Joinpoints.

Chile / male / Incidence 40-: 0 Joinpoints

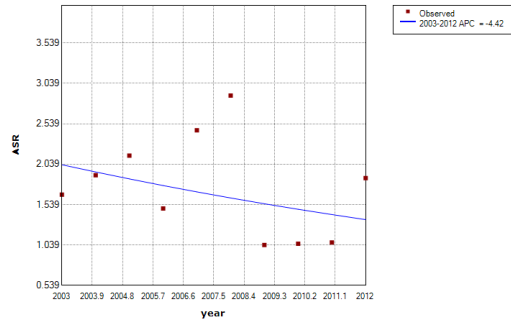

\* Indicates that the Annual Percent Change (APC) is significantly different from zero at the alpha = 0.05 level. Final Selected Model: 0 Joinpoints.



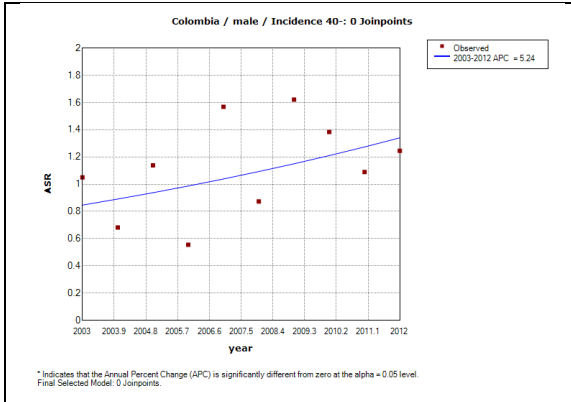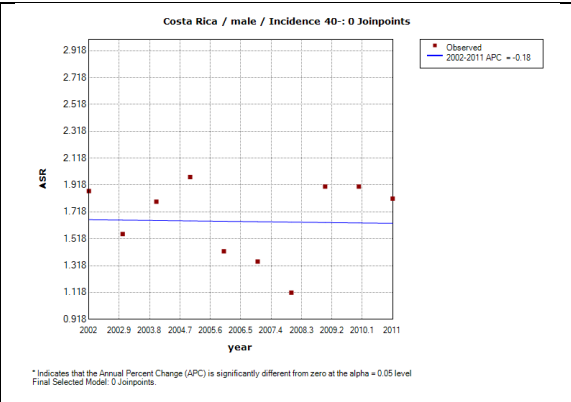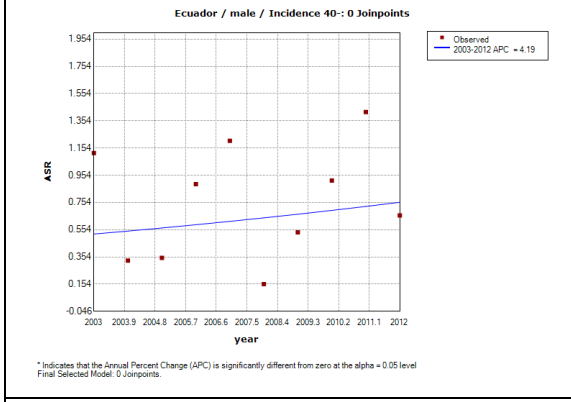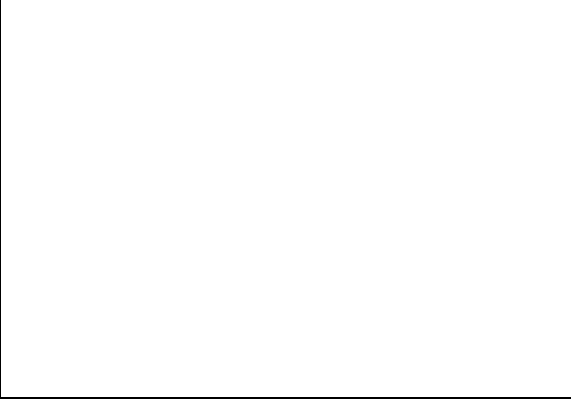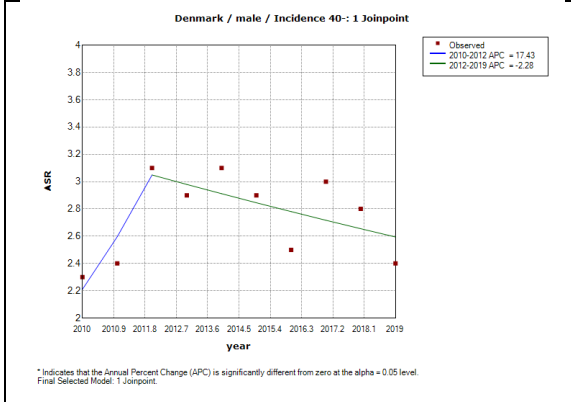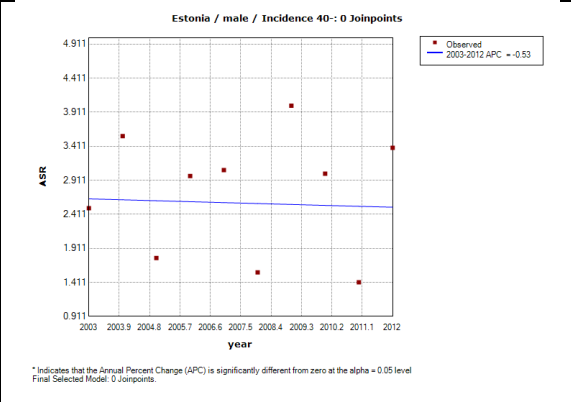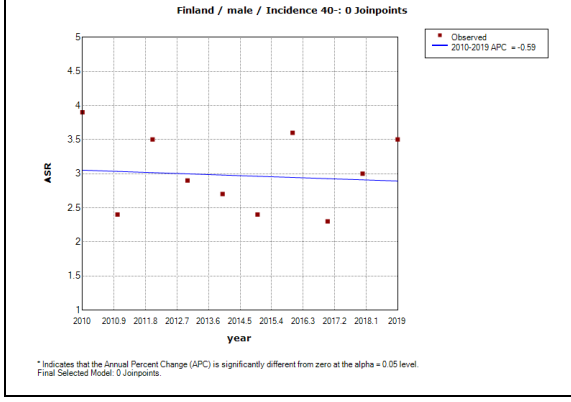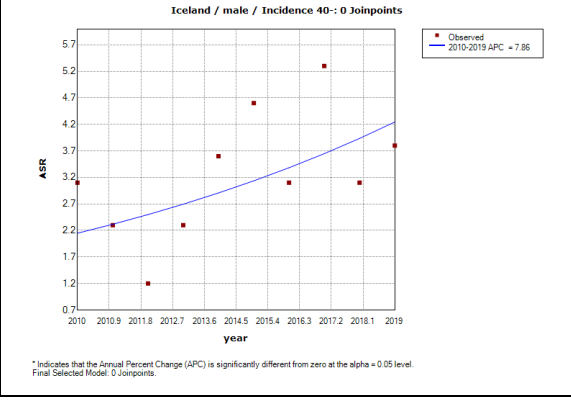

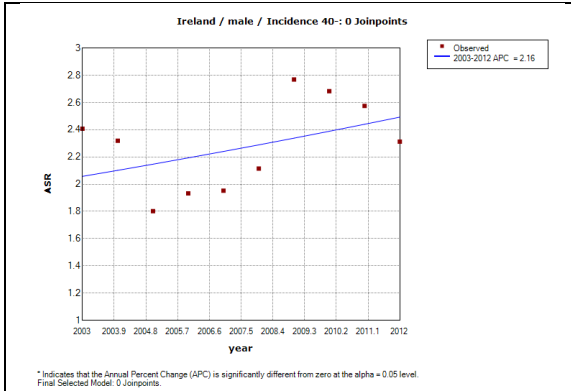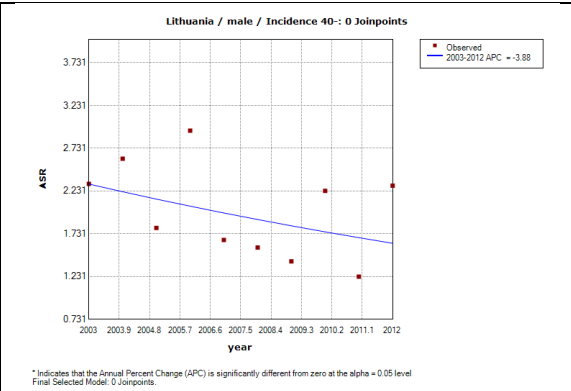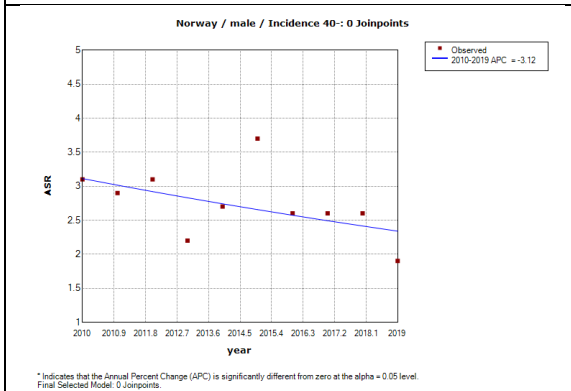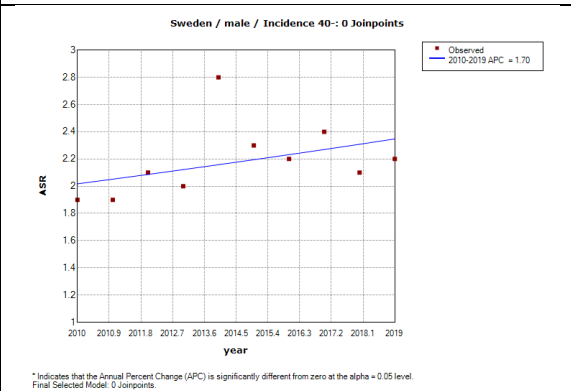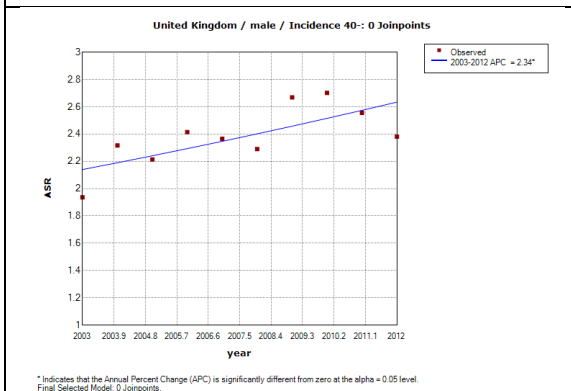

## Western Europe

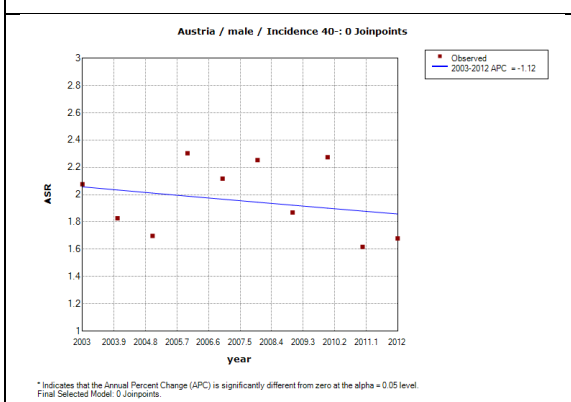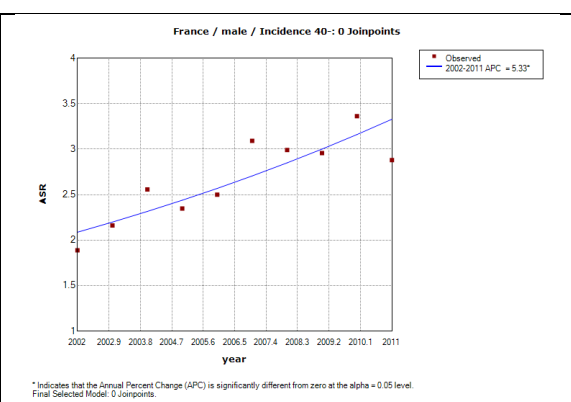

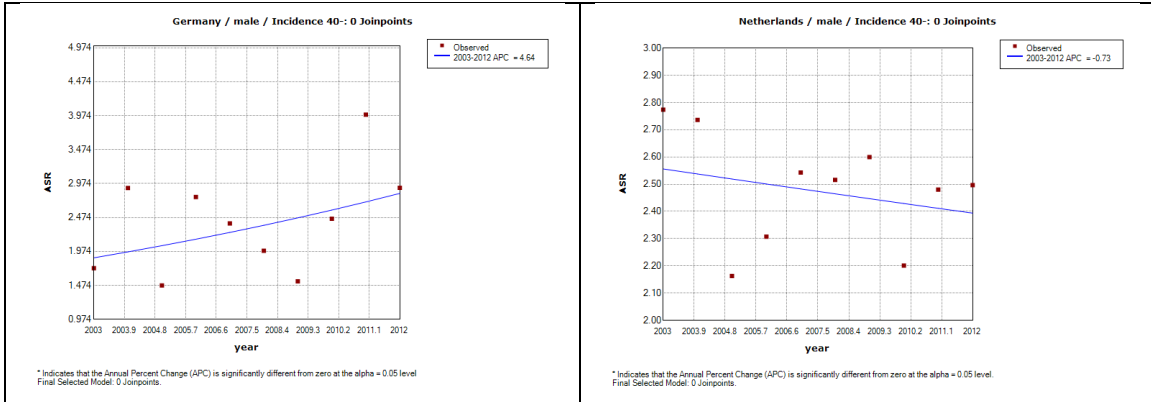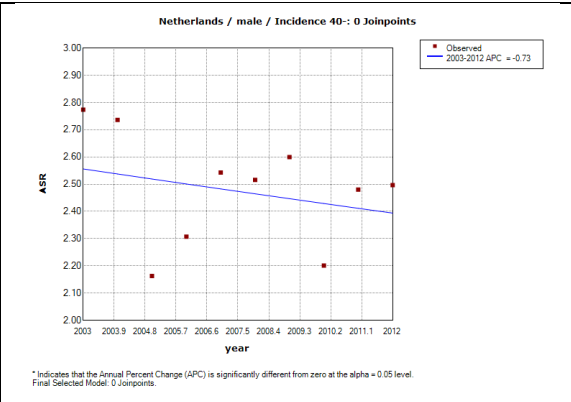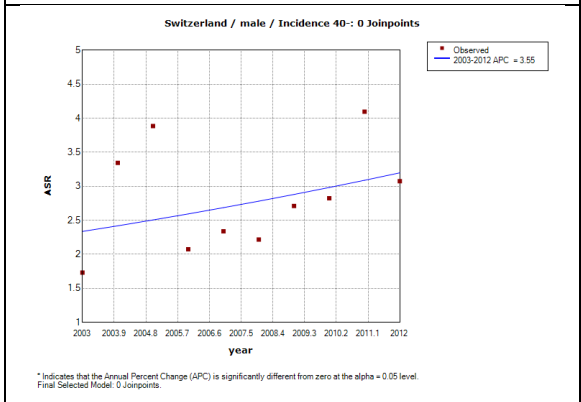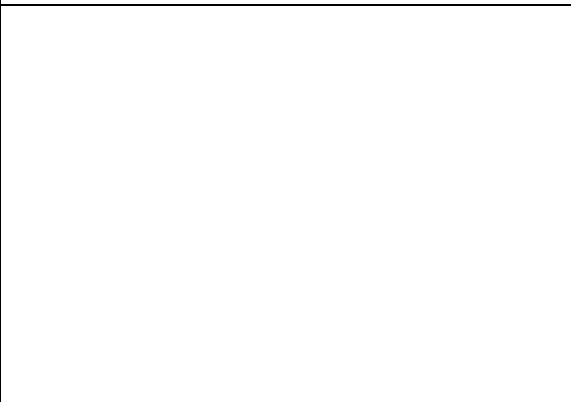

## Southern Europe

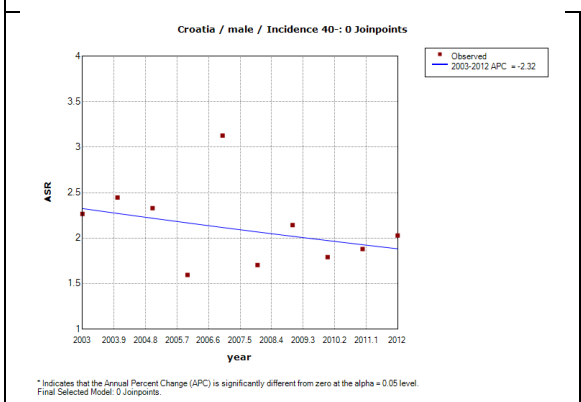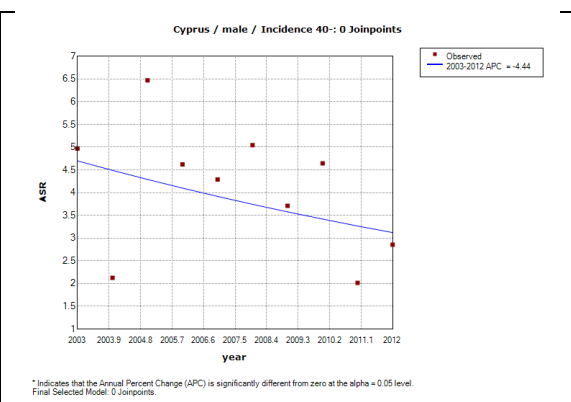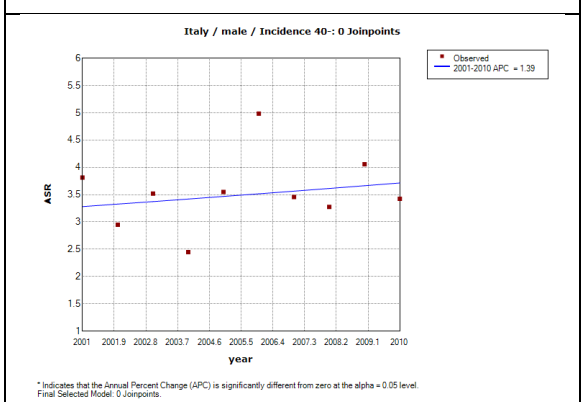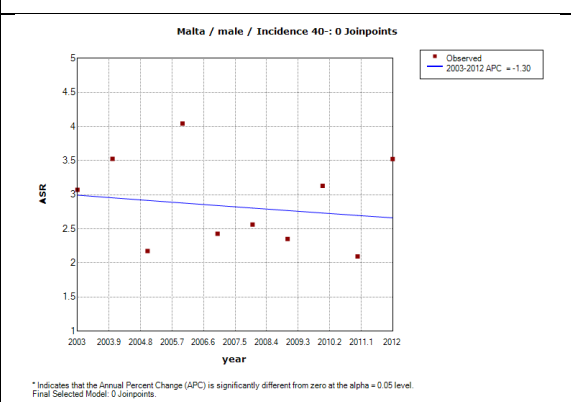

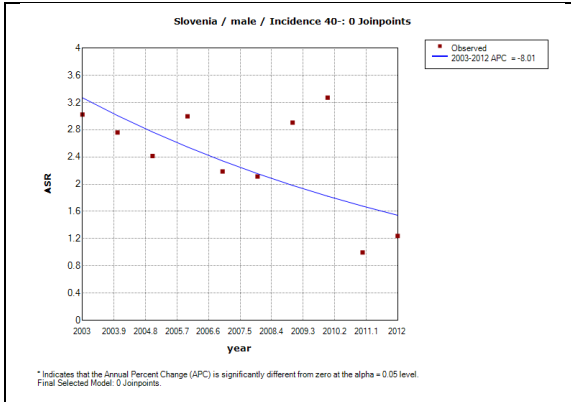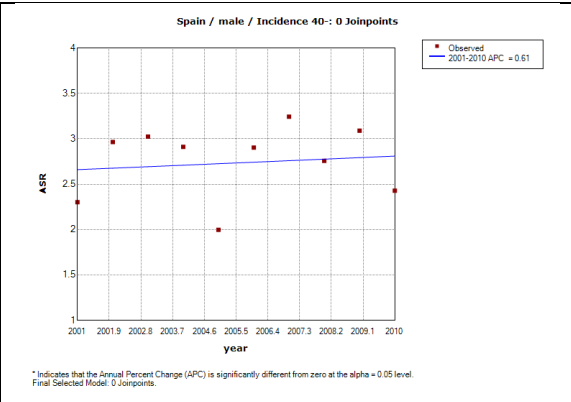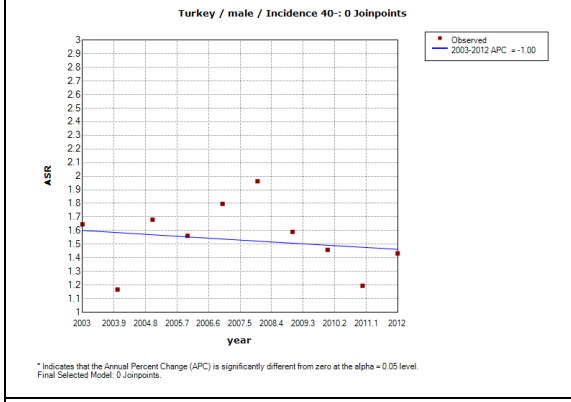

## Eastern Europe

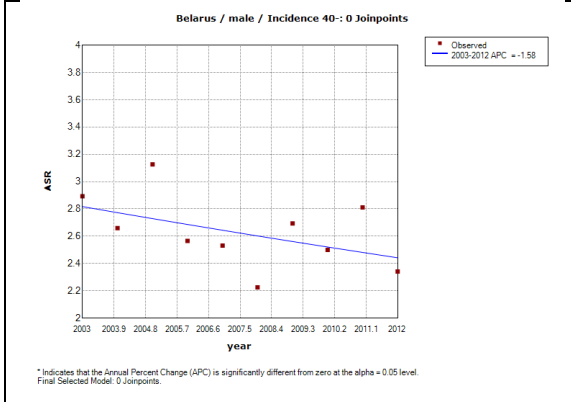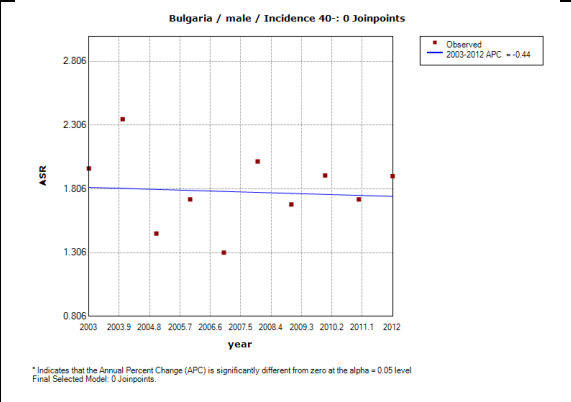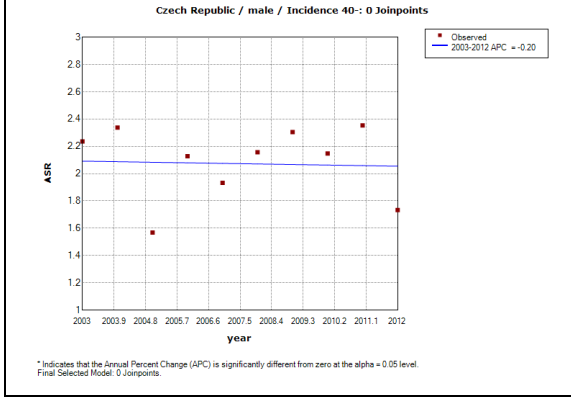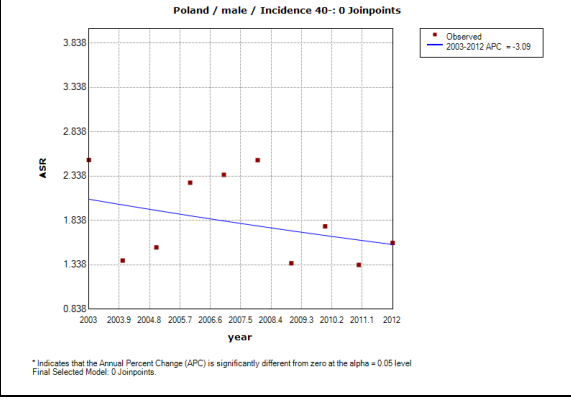

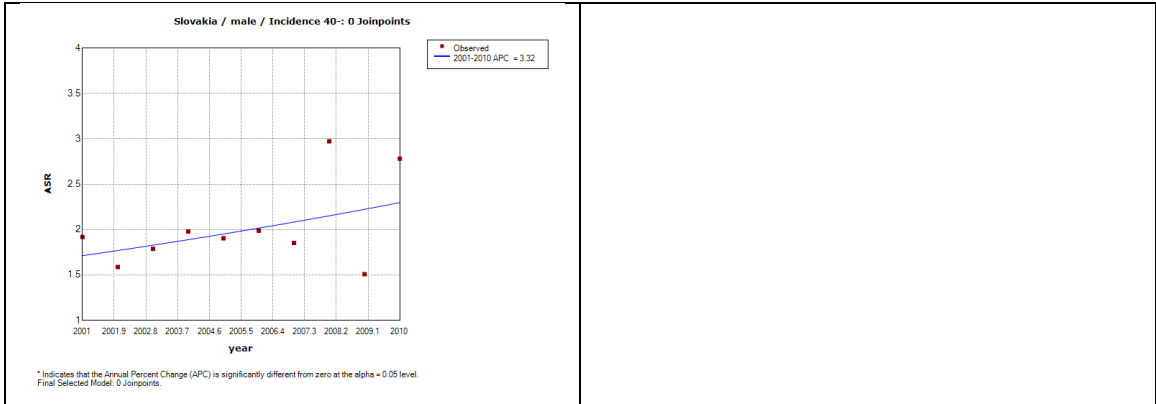

## Africa

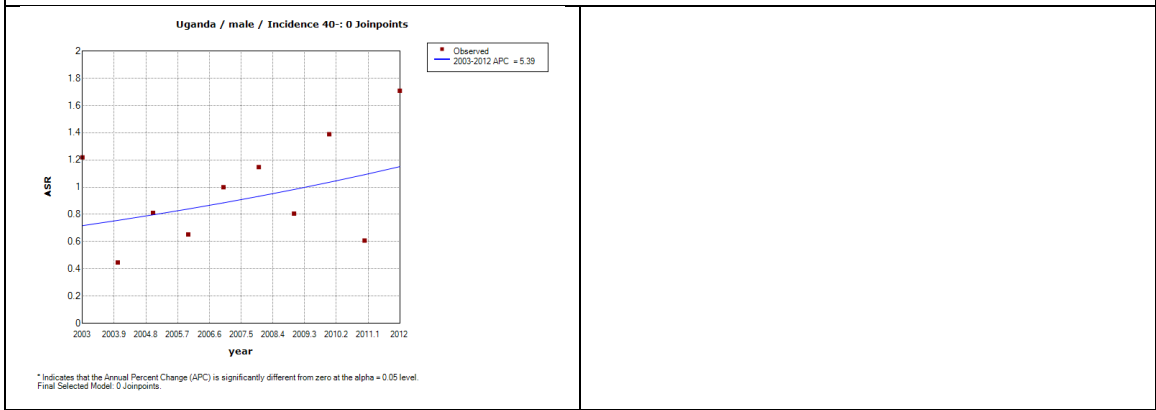

d.) Incidence female below 40 years old

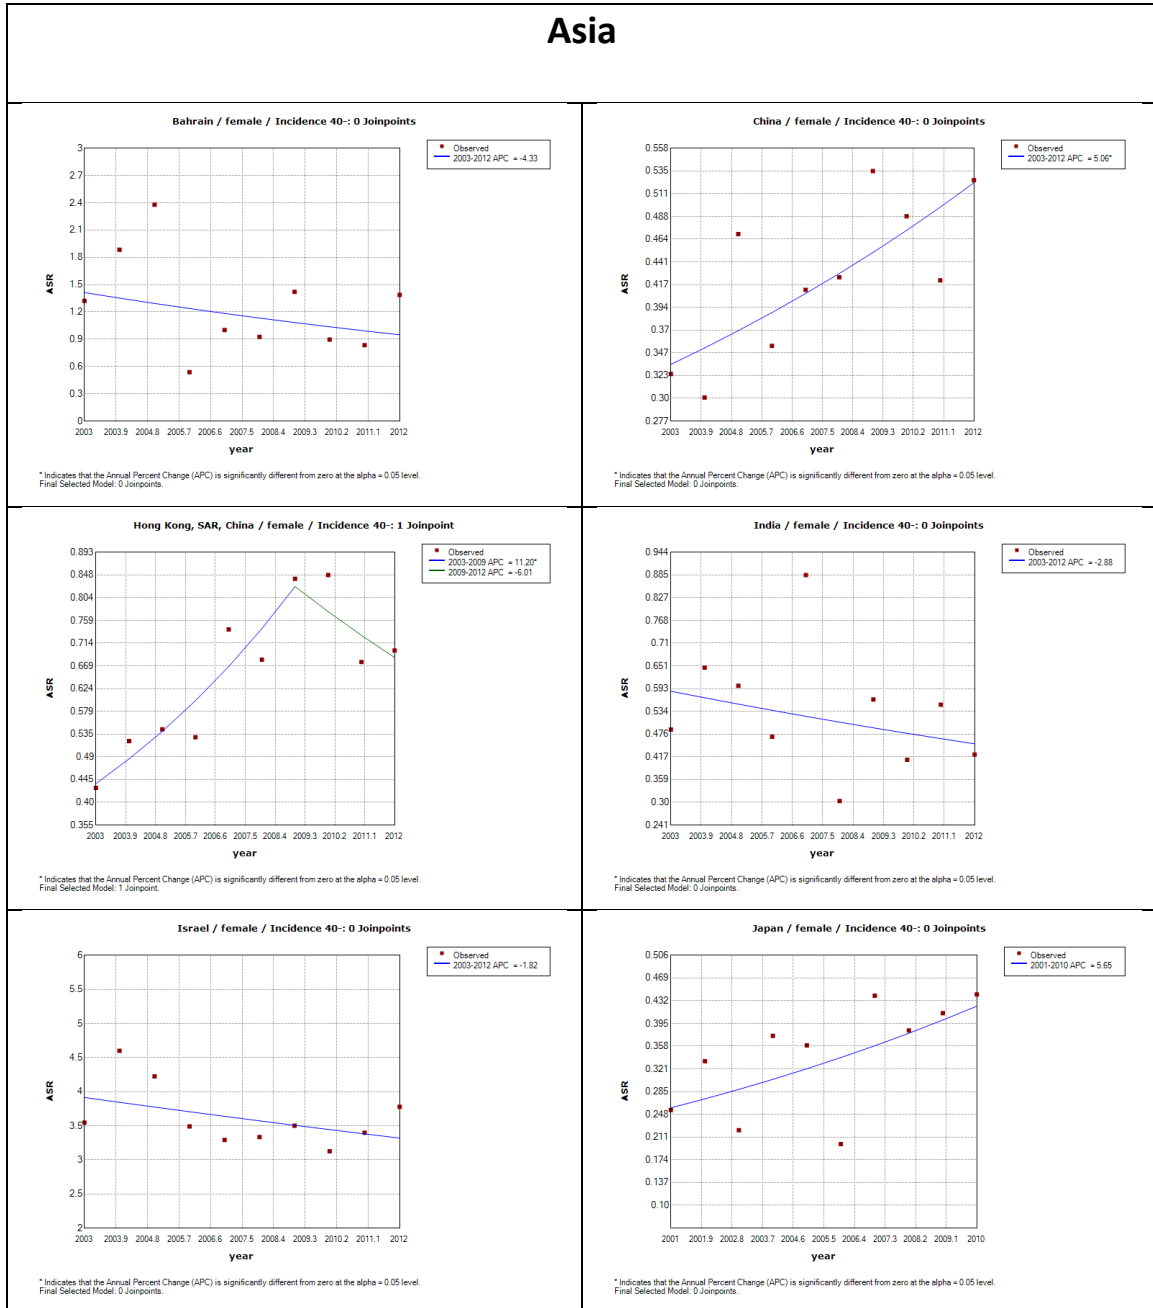

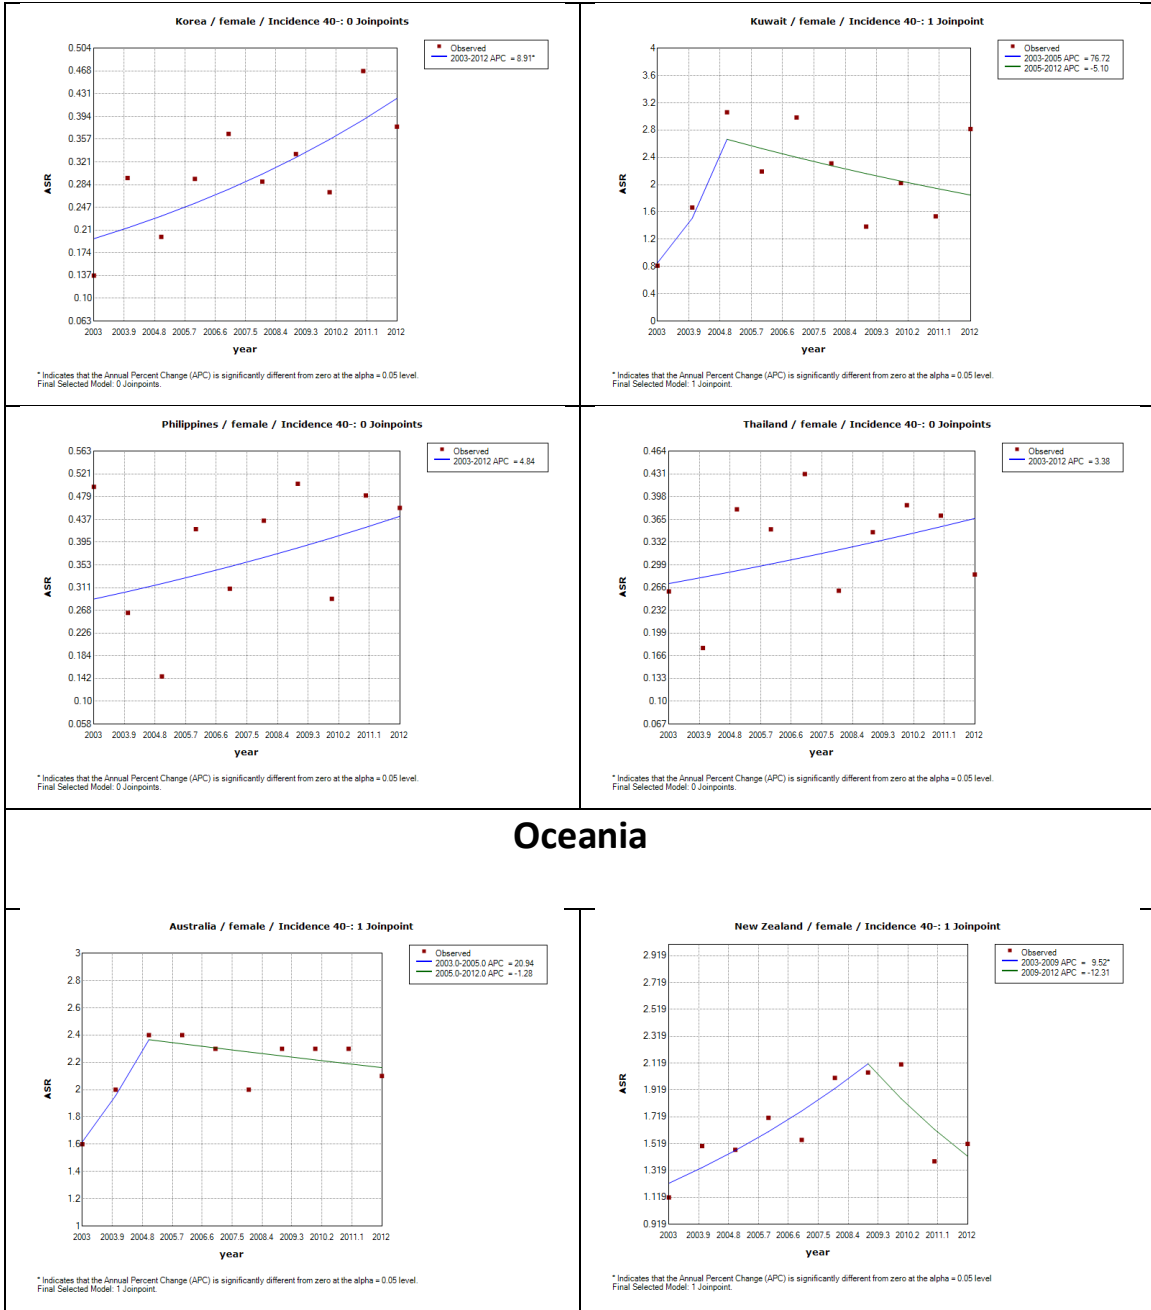

# North America

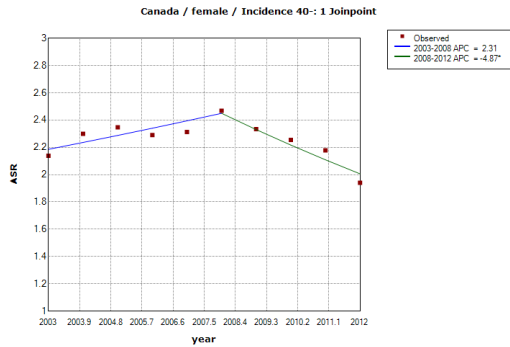

\* Indicates that the Annual Percent Change (APC) is significantly different from zero at the alpha = 0.05 level. Final Selected Model: 1 Joinpoint.

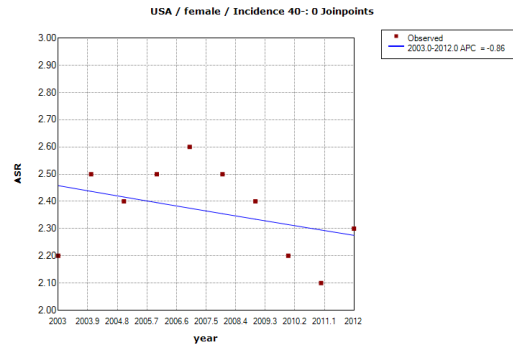

\* Indicates that the Annual Percent Change (APC) is significantly different from zero at the alpha = 0.05 level. Final Selected Model: 0 Joinpoints.

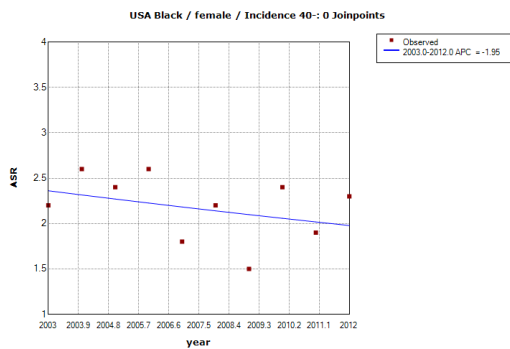

\* Indicates that the Annual Percent Change (APC) is significantly different from zero at the alpha = 0.05 level. Final Selected Model: 0 Joinpoints.

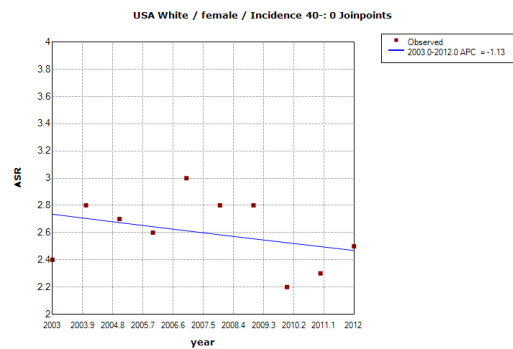

\* Indicates that the Annual Percent Change (APC) is significantly different from zero at the alpha = 0.05 level. Final Selected Model: 0 Joinpoints.

# South America

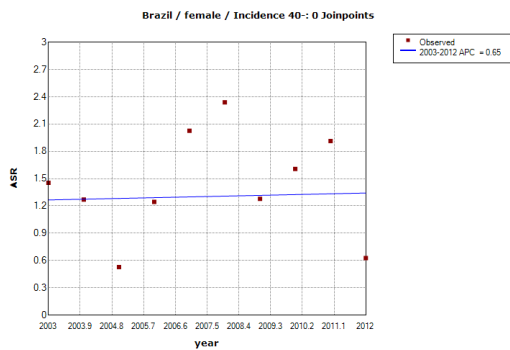

\* Indicates that the Annual Percent Change (APC) is significantly different from zero at the alpha = 0.05 level. Final Selected Model: 0 Joinpoints.

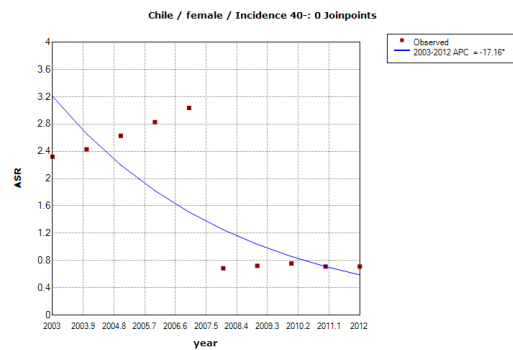

\* Indicates that the Annual Percent Change (APC) is significantly different from zero at the alpha = 0.05 level. Final Selected Model: 0 Joinpoints.



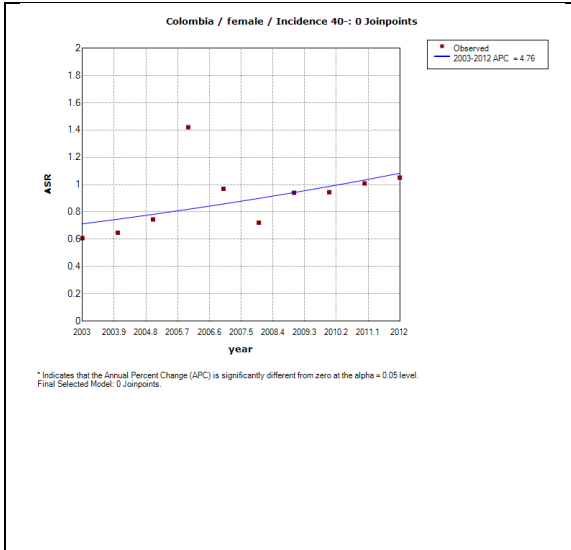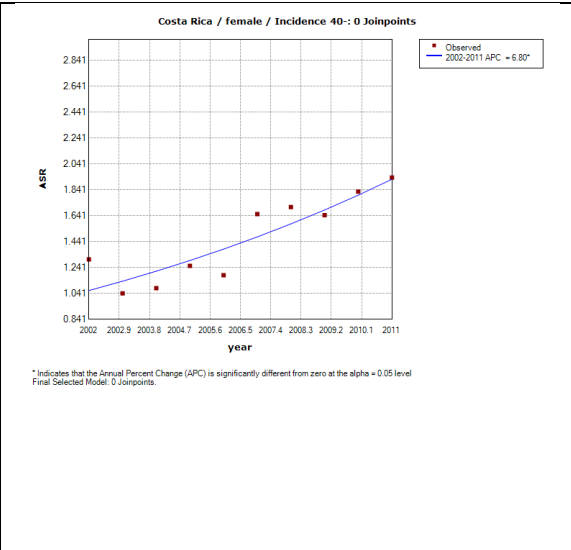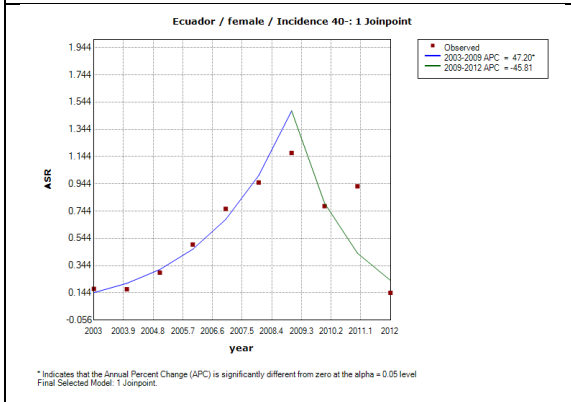

## Northern Europe

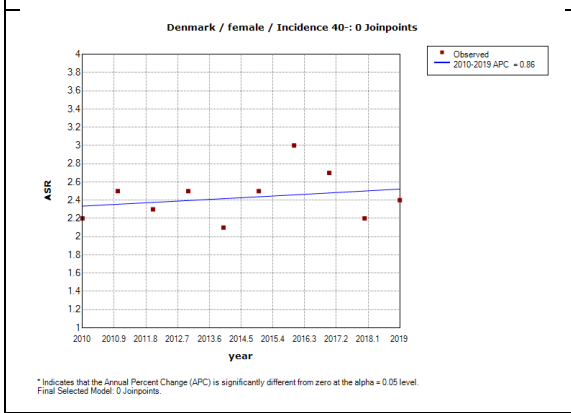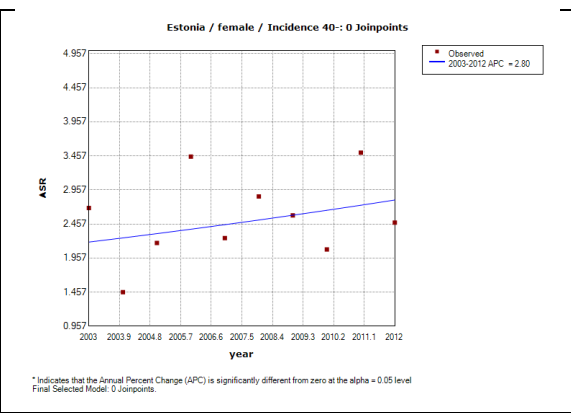

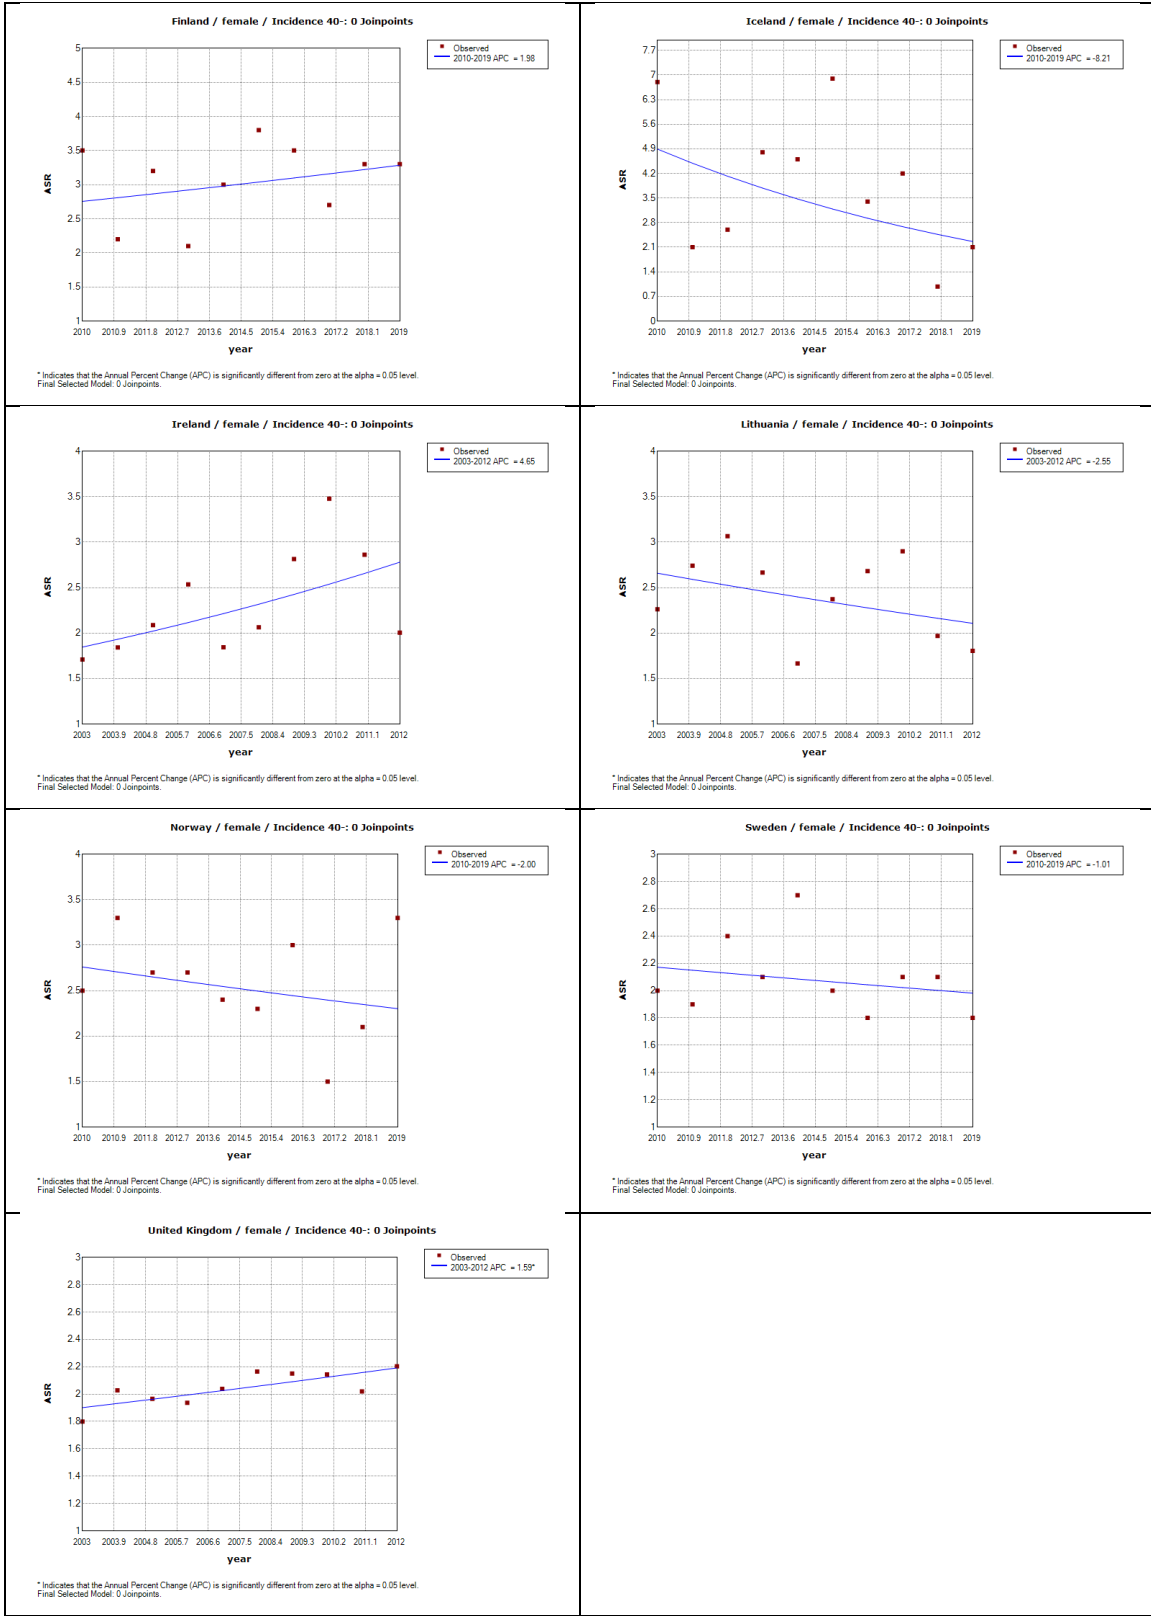

## Western Europe

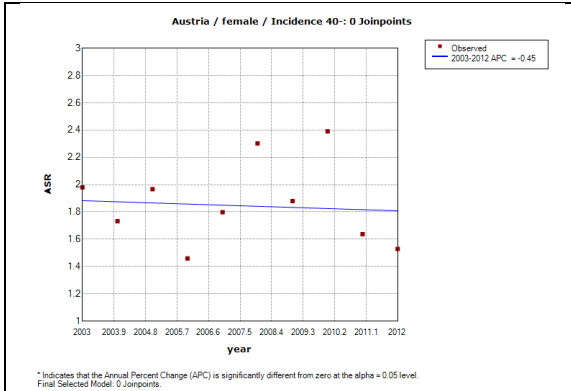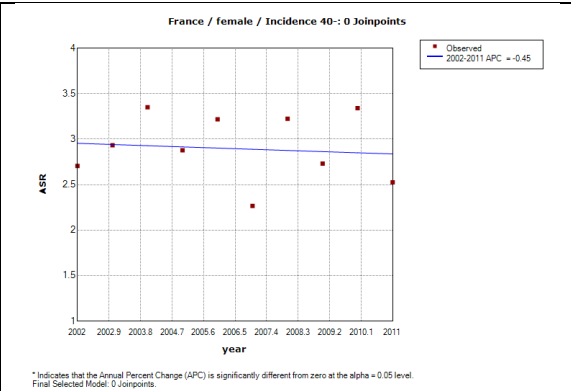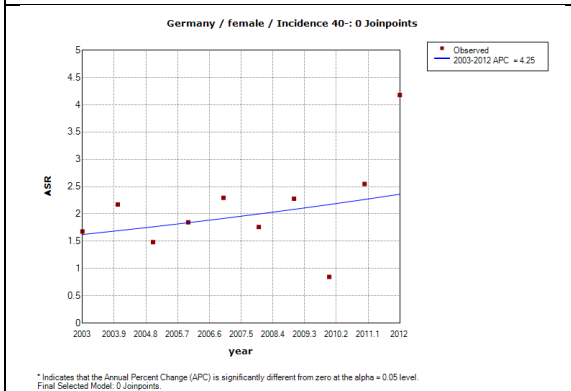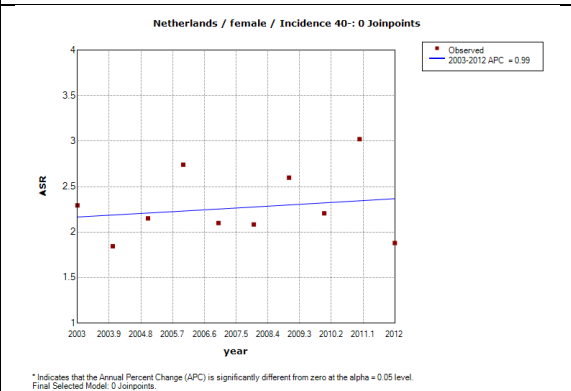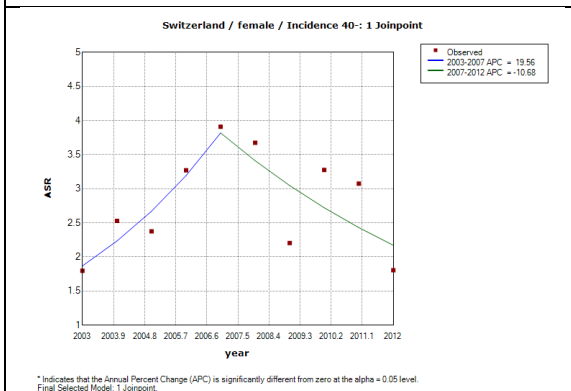

## Southern Europe

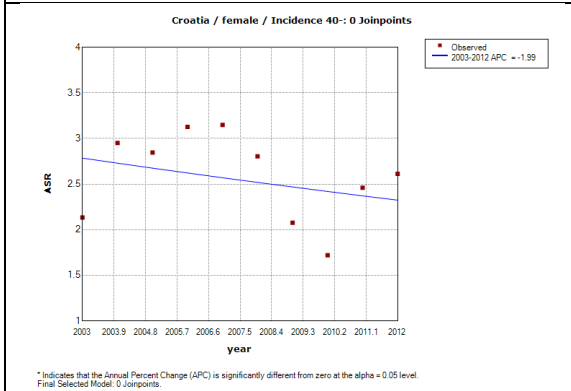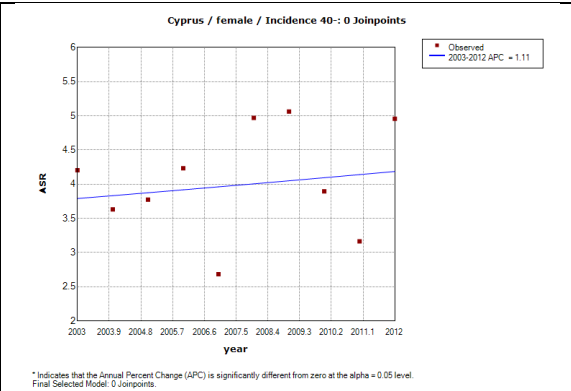

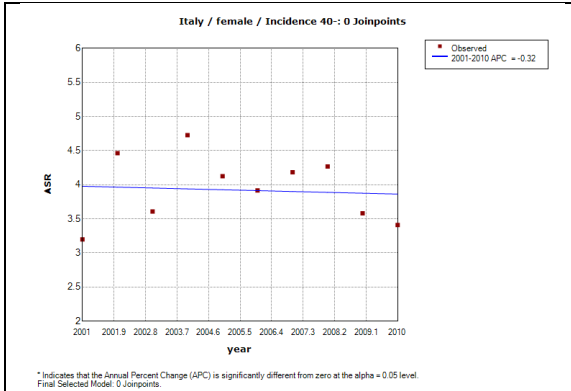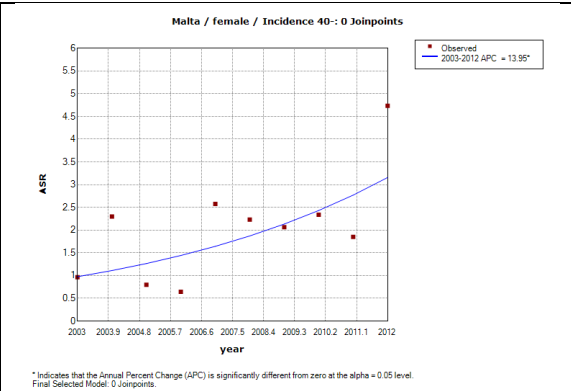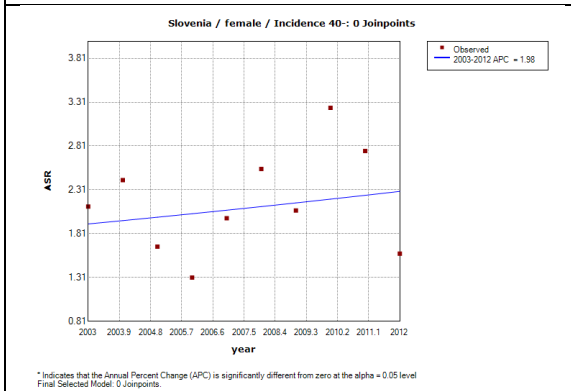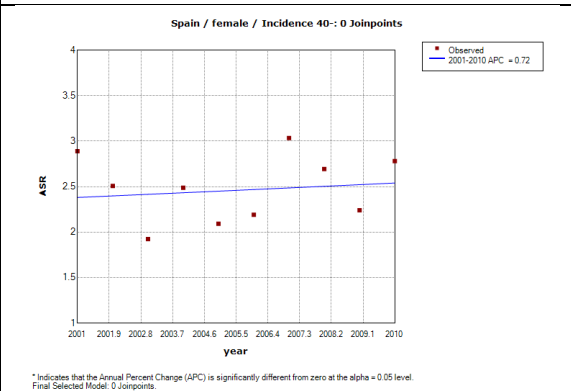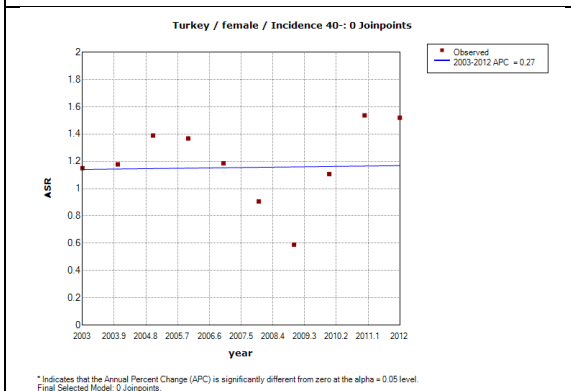

## Eastern Europe

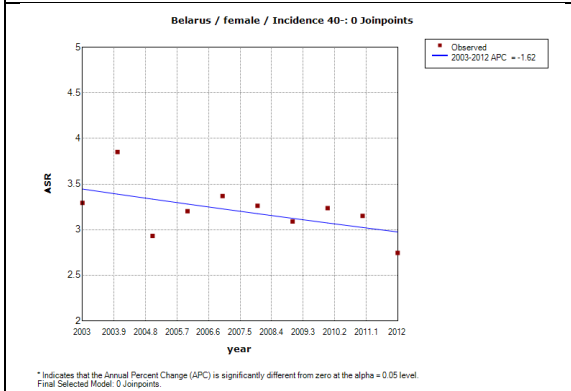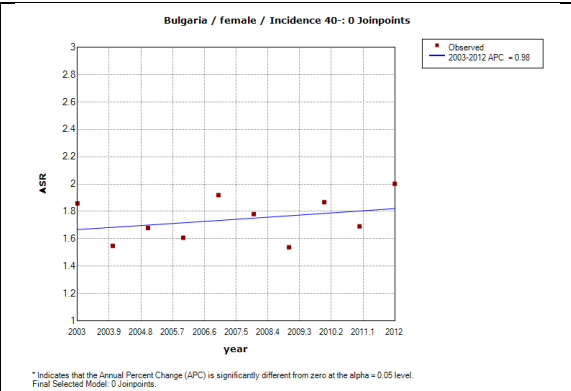

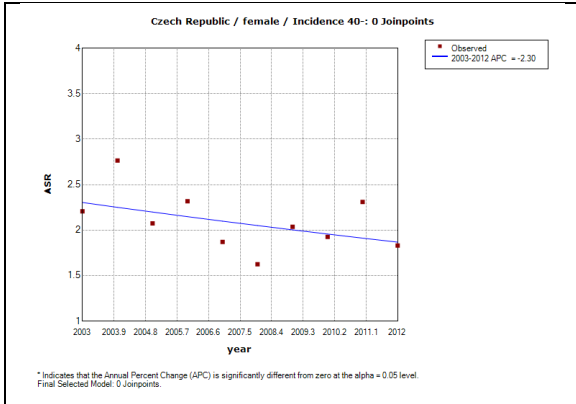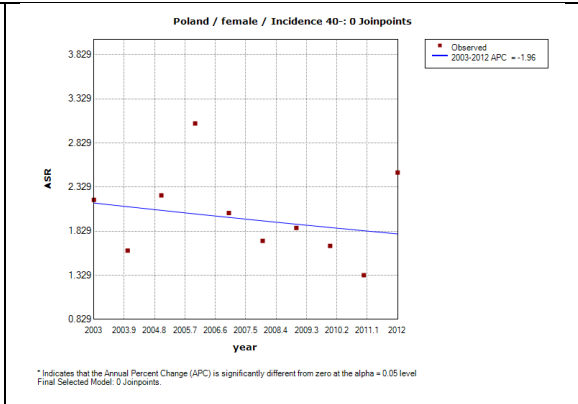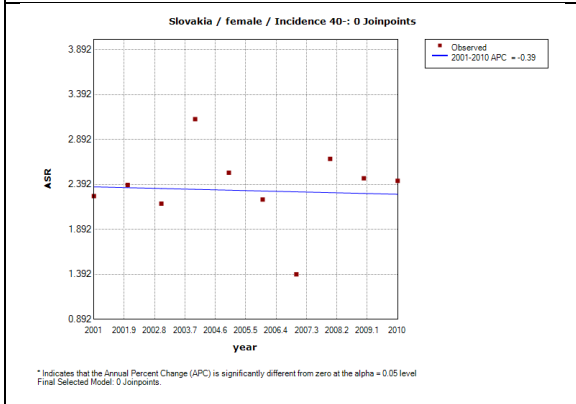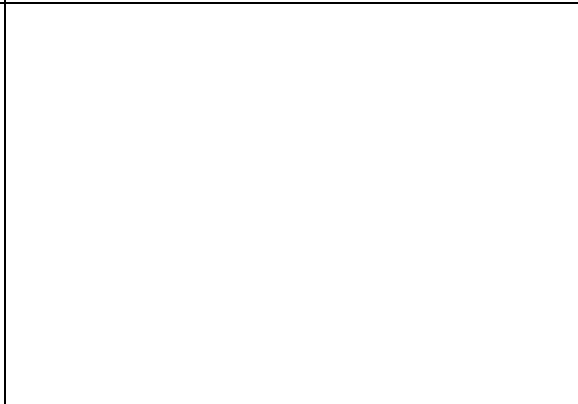

## Africa

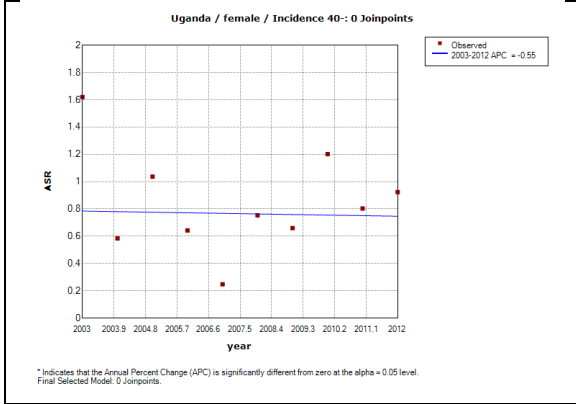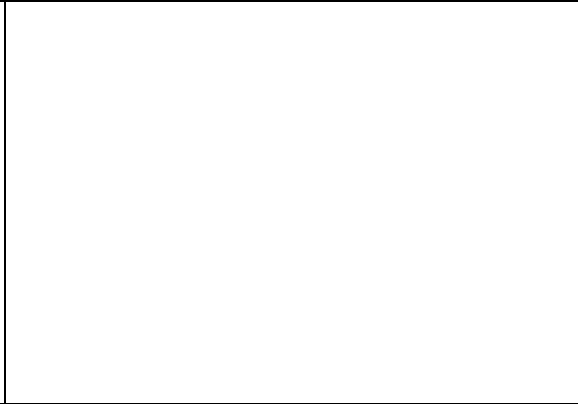

e.) Incidence male below 50 years old

## Asia

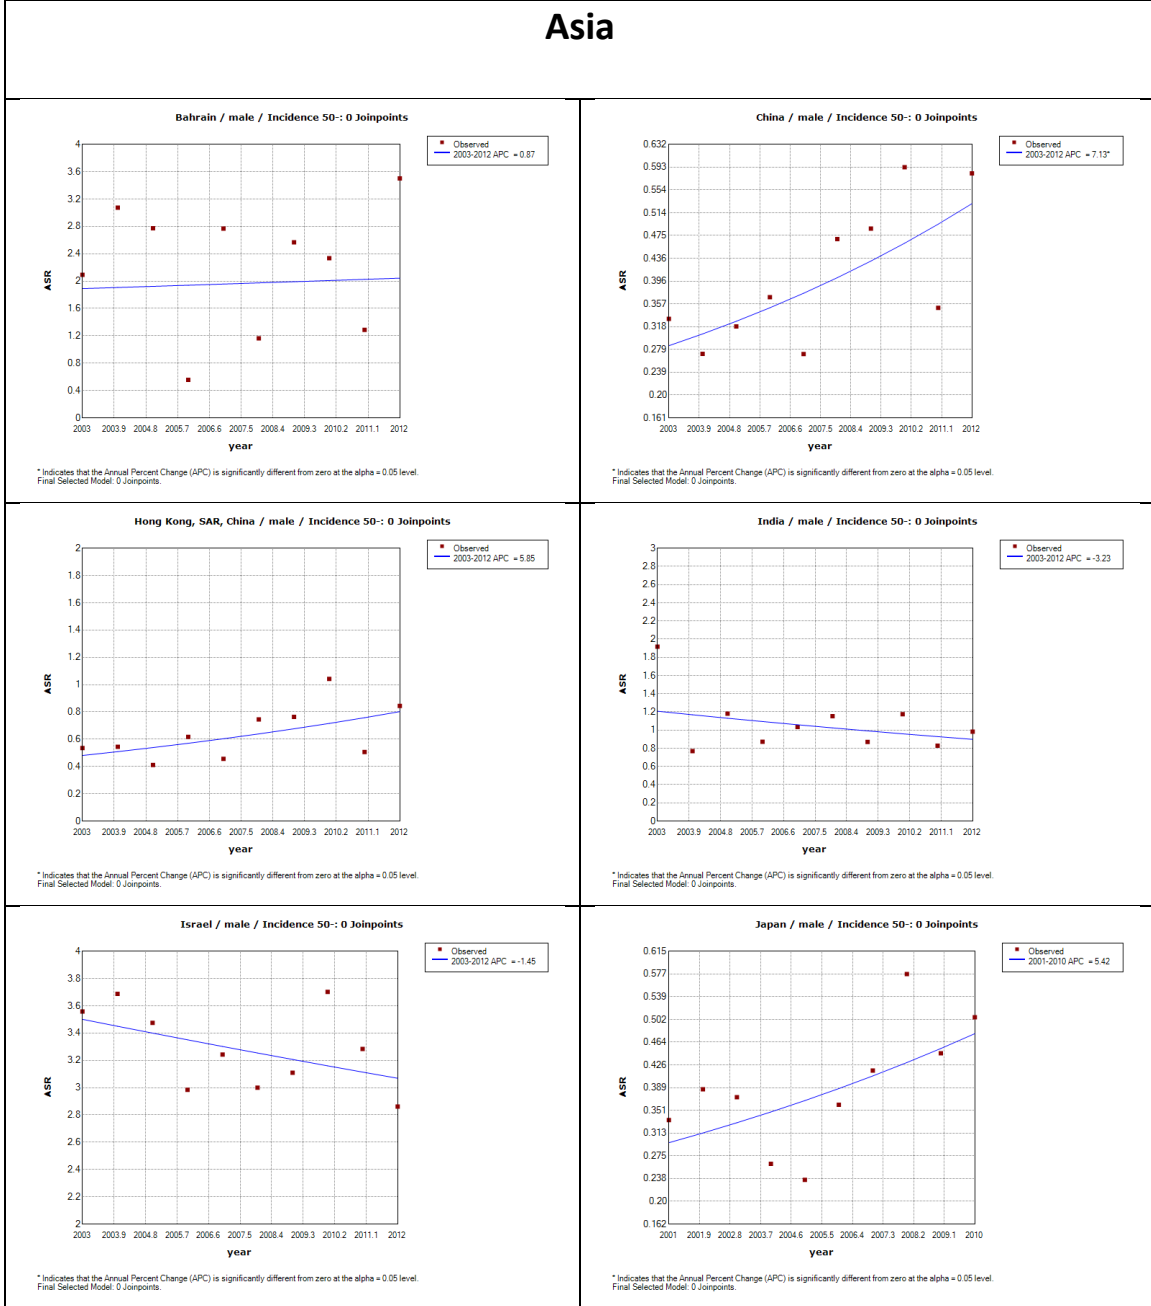

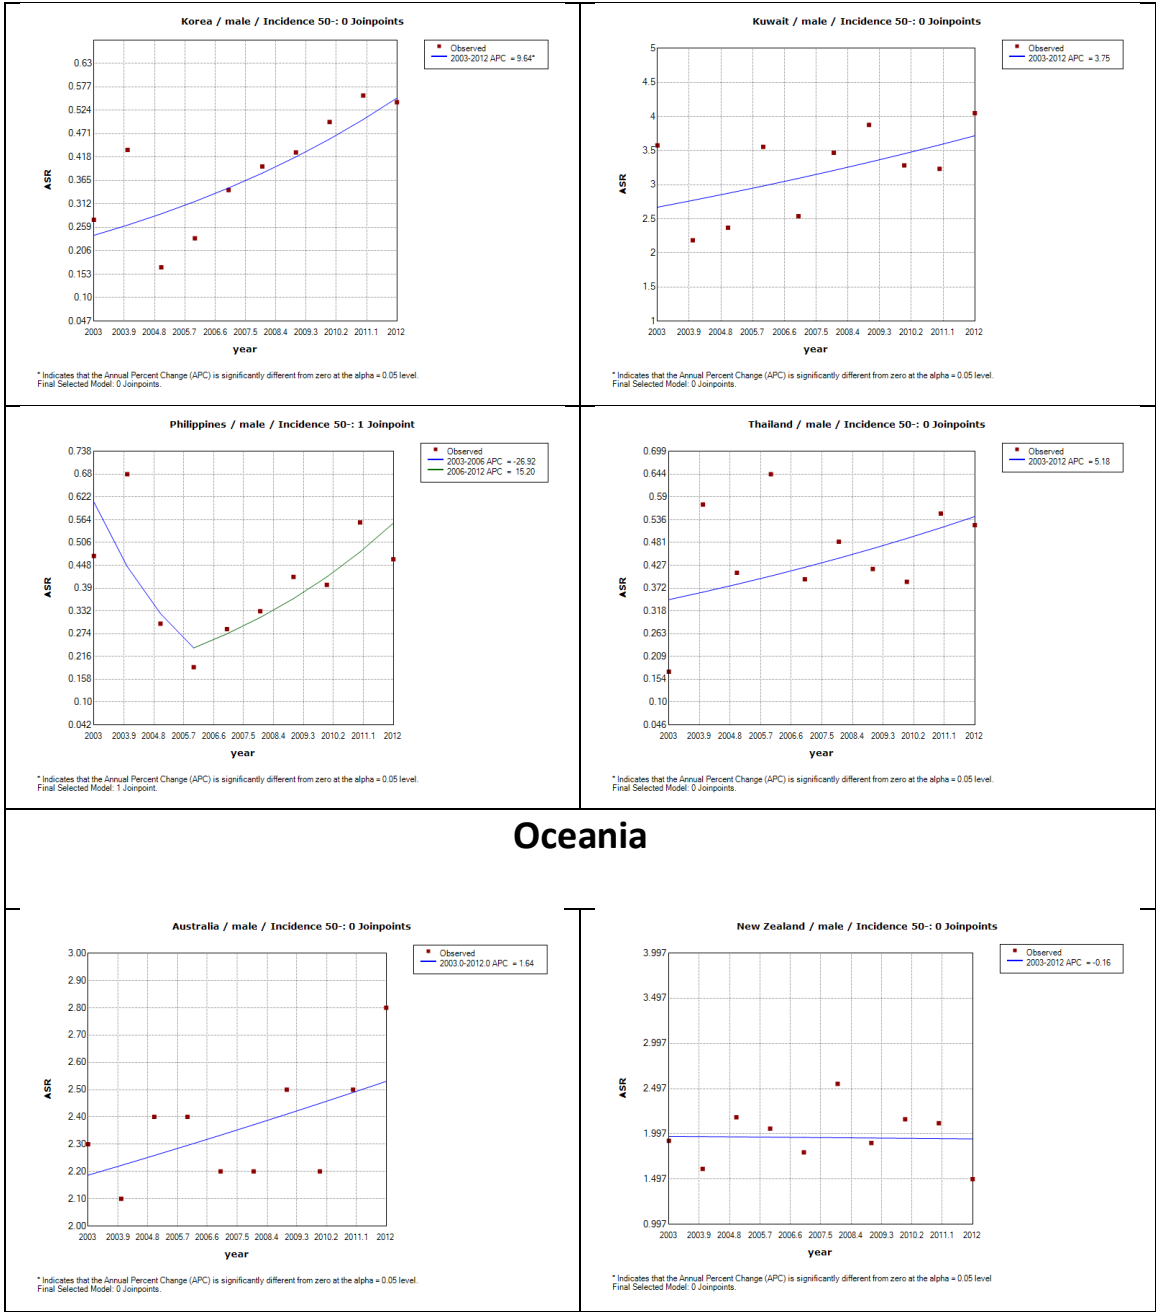

# North America

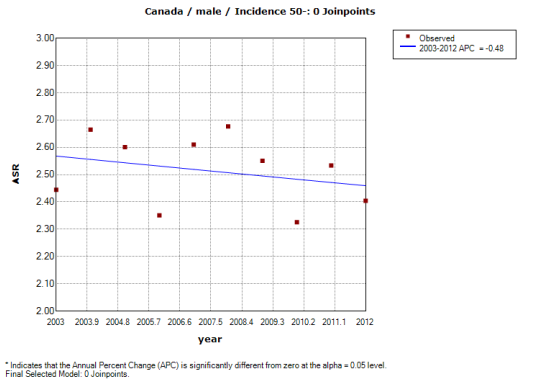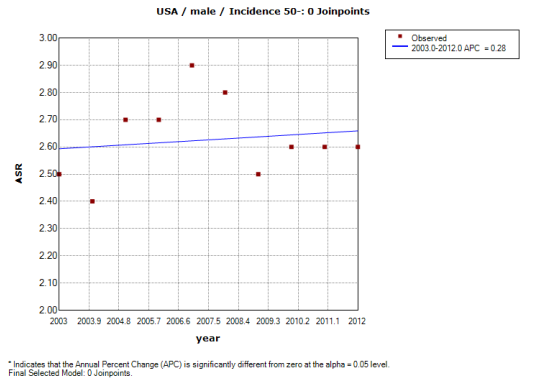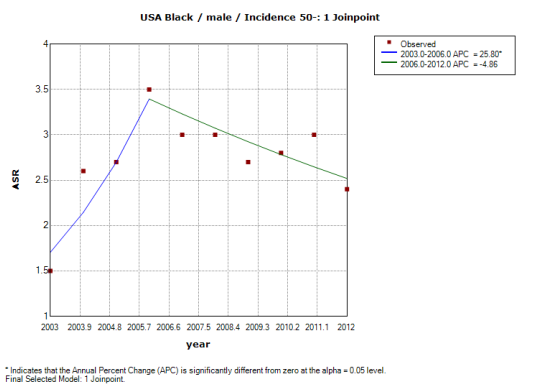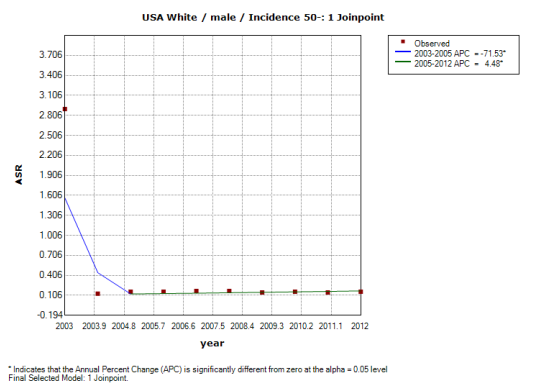

# South America

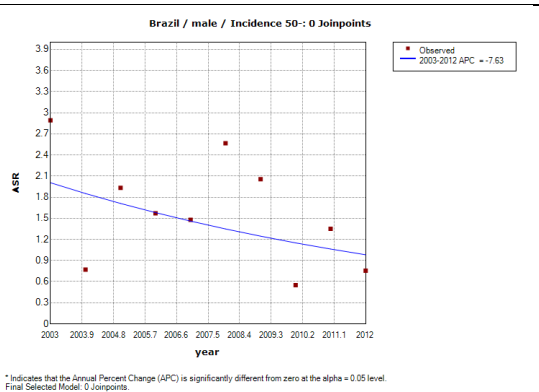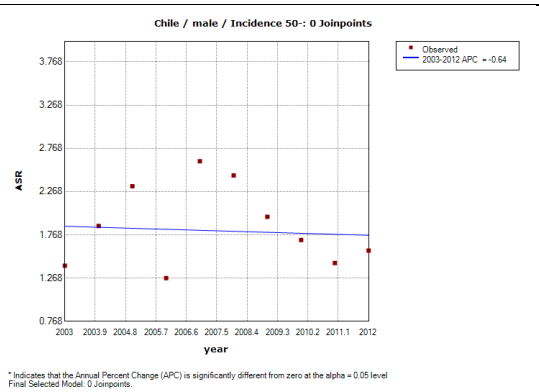



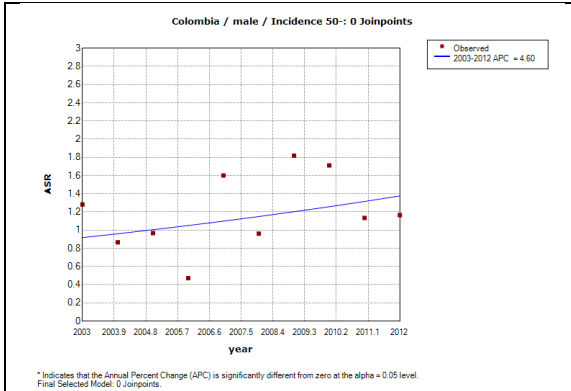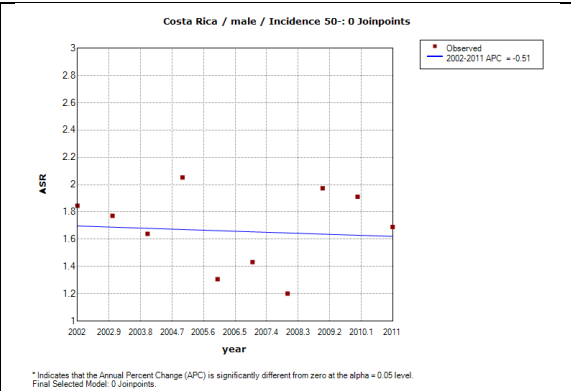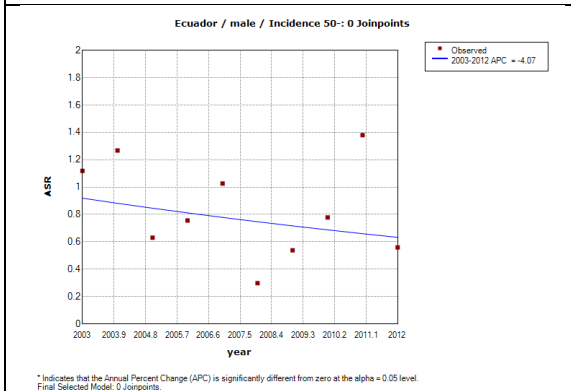

## Northern Europe

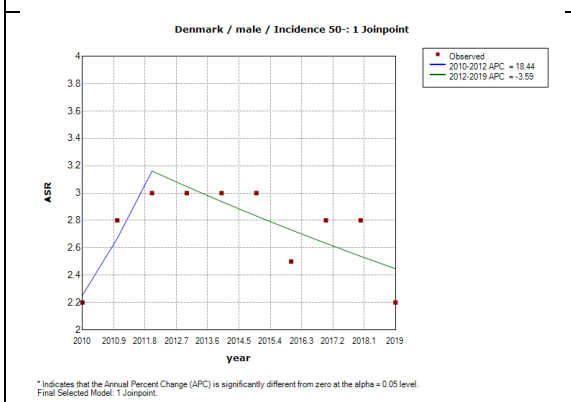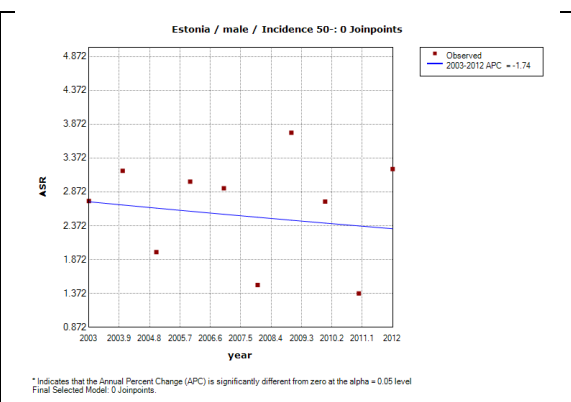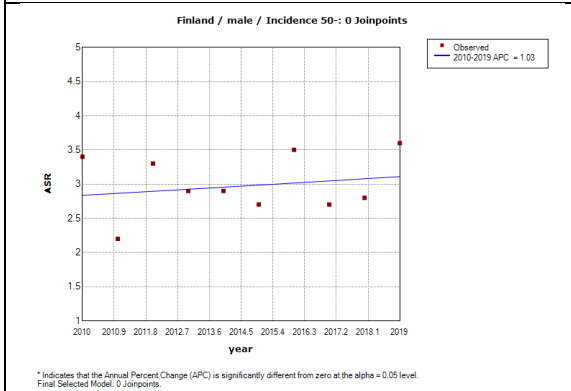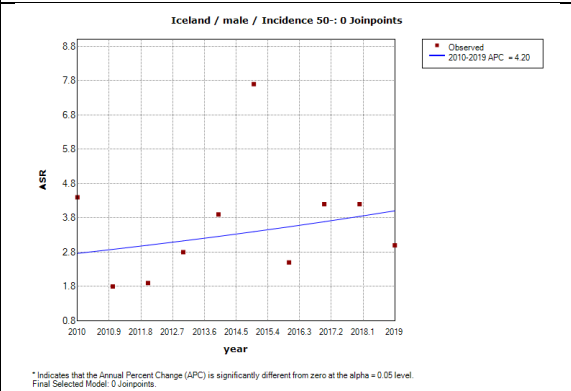

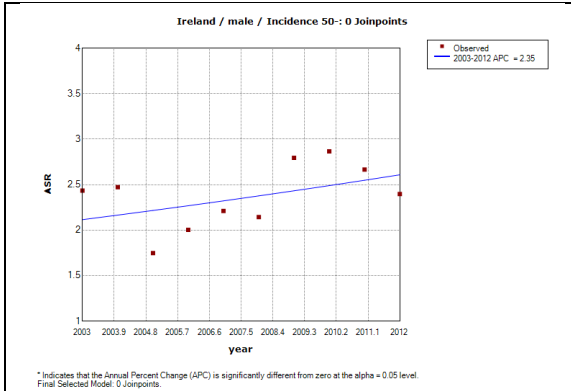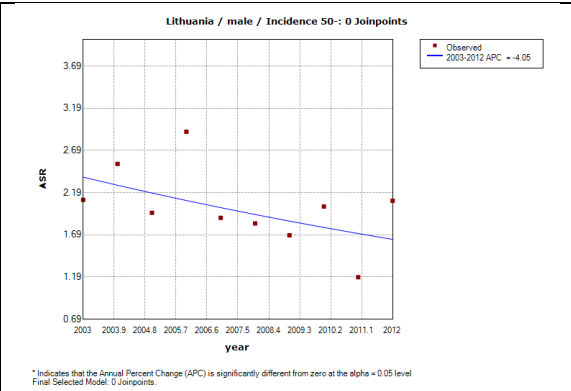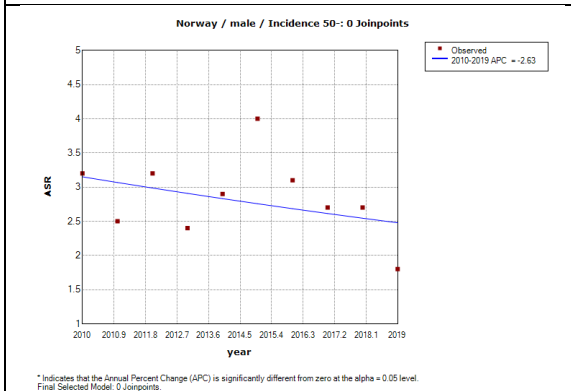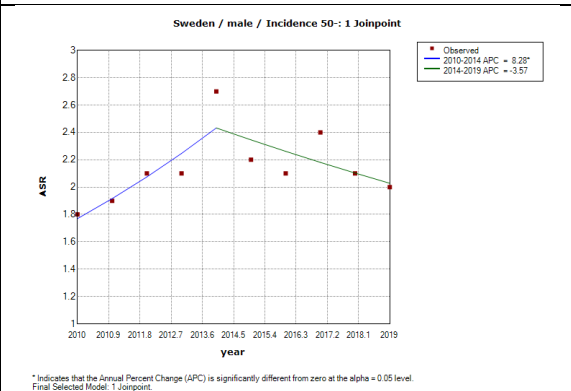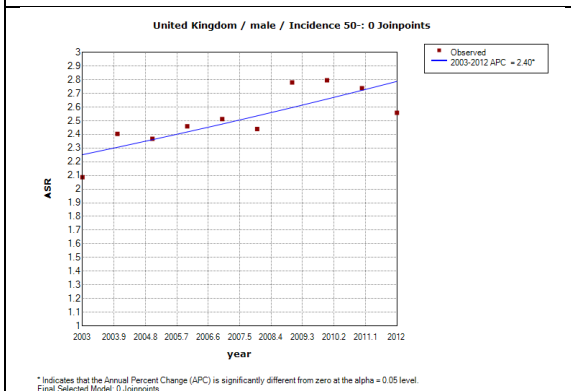

## Western Europe

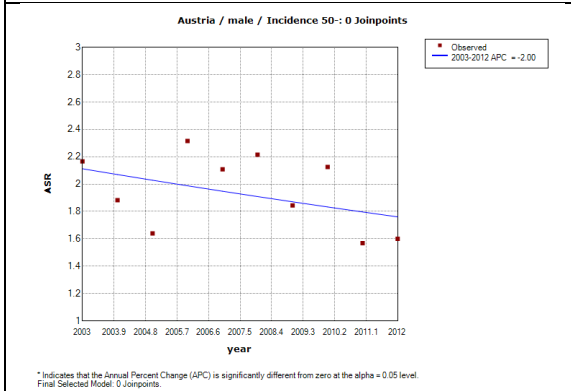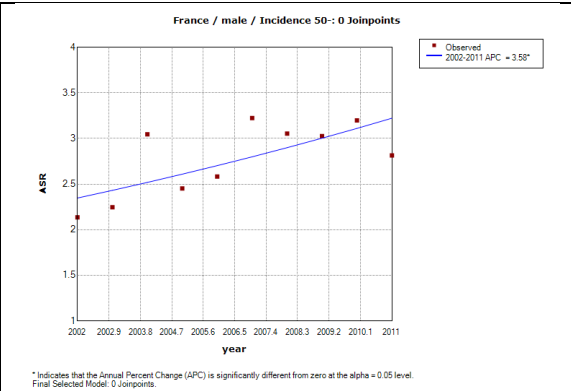

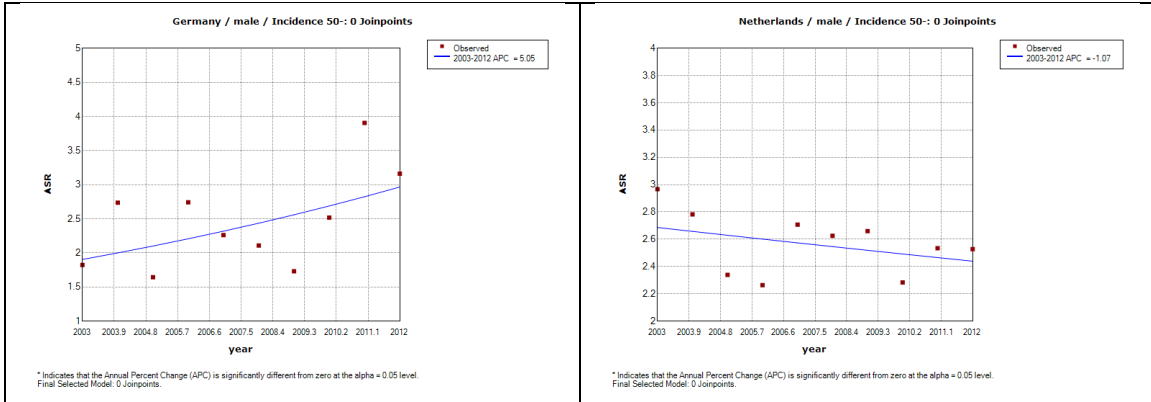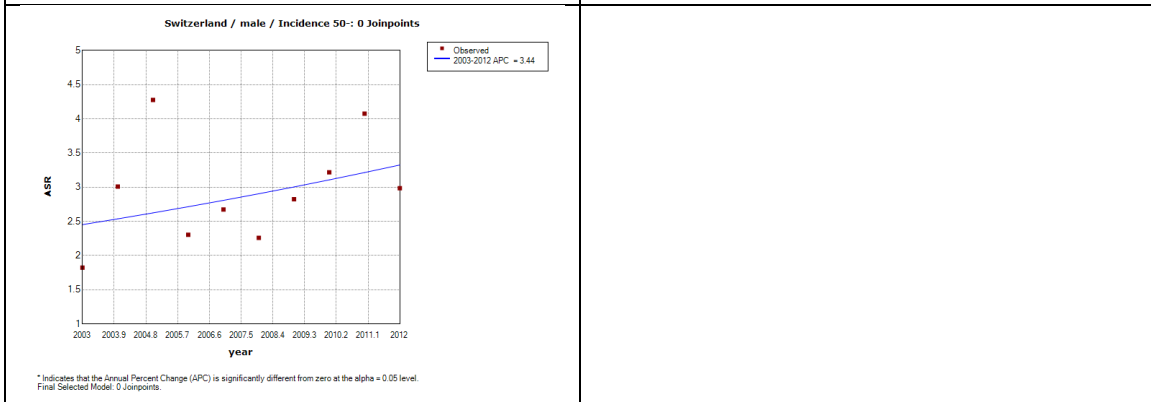

## Southern Europe

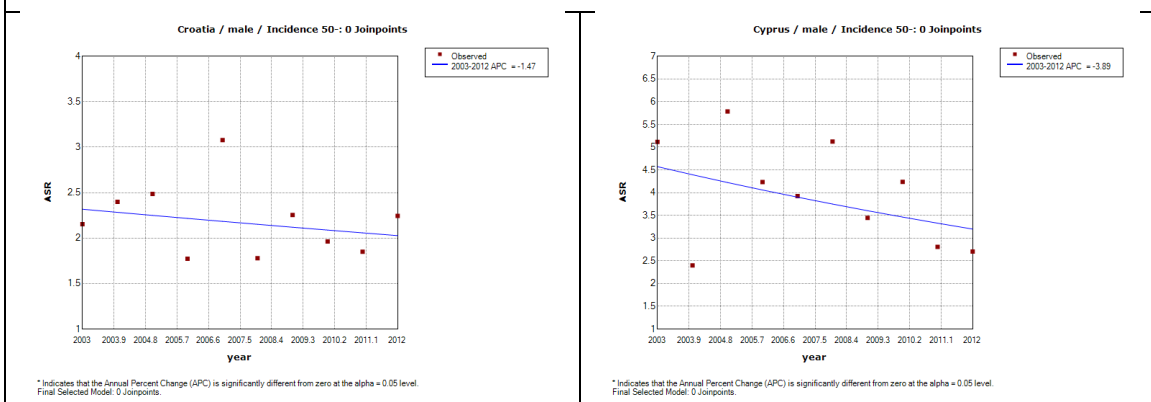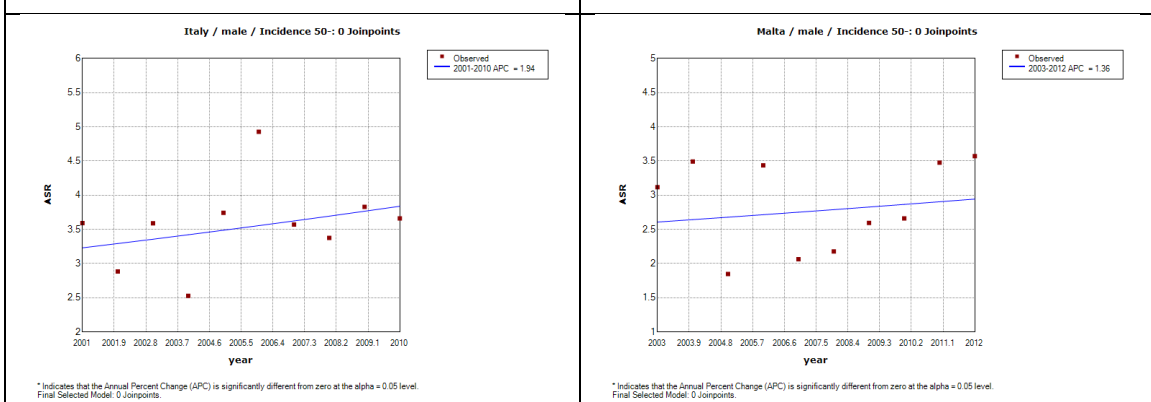

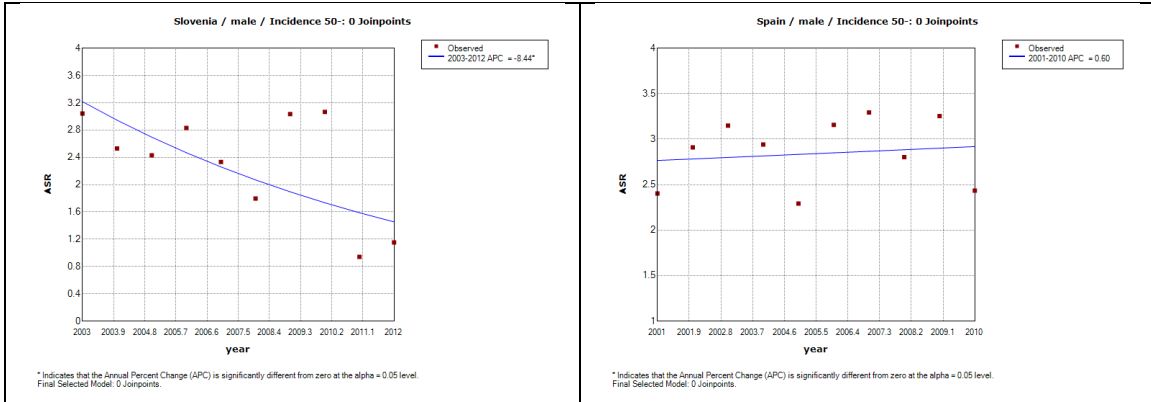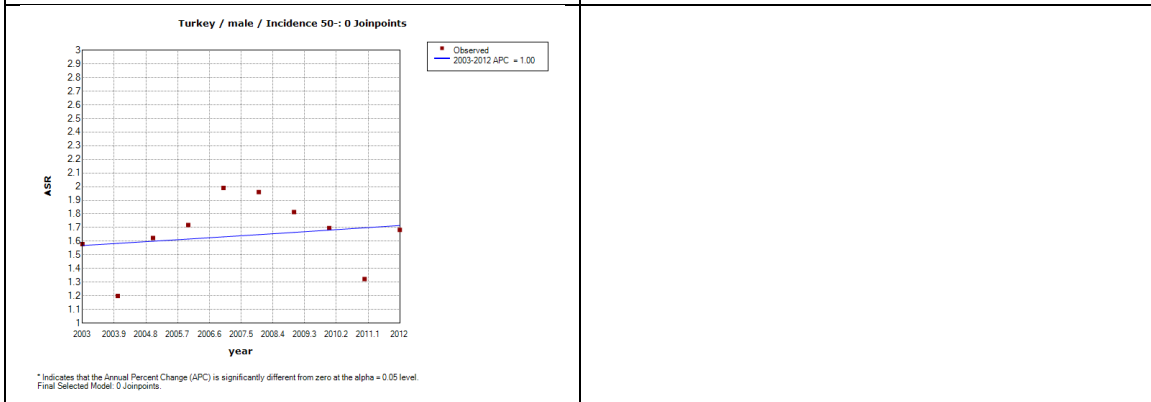

## Eastern Europe

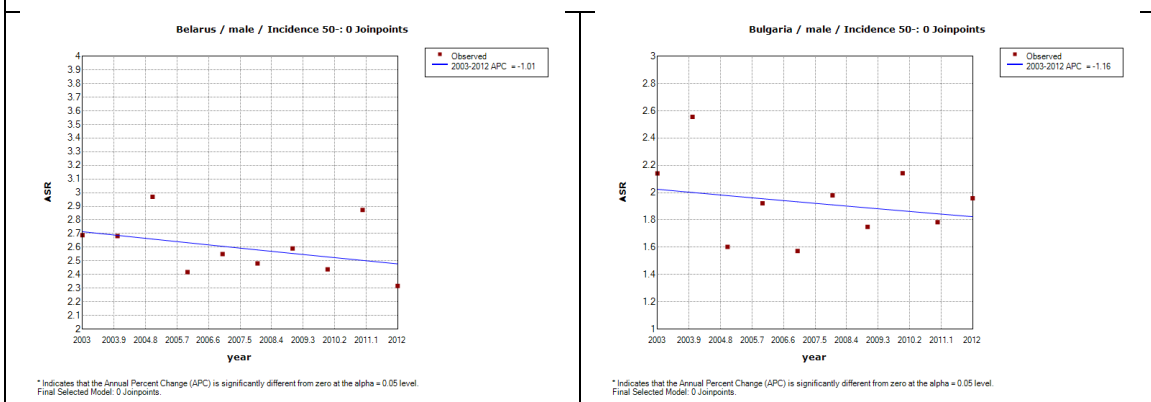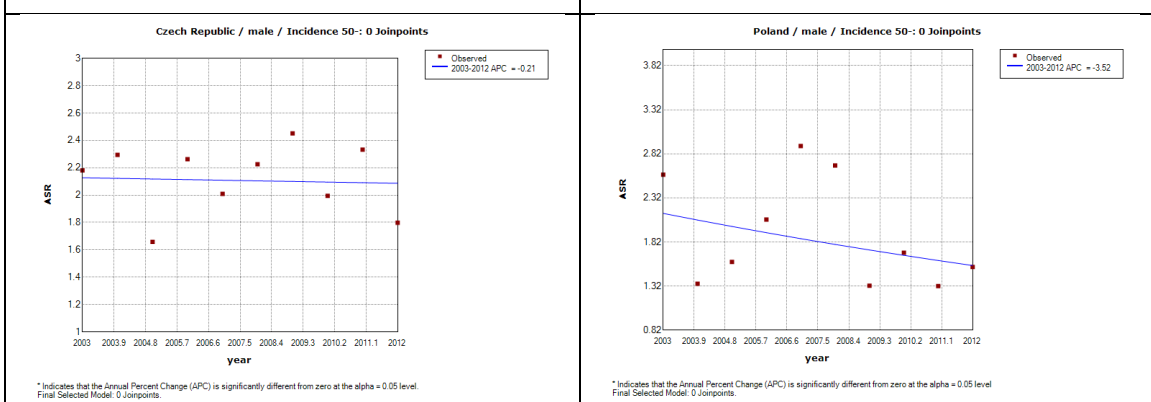

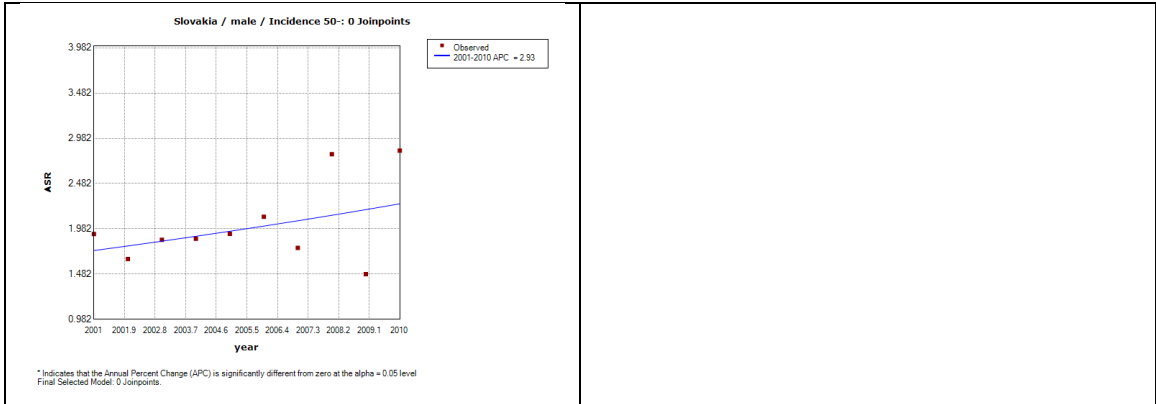

## Africa

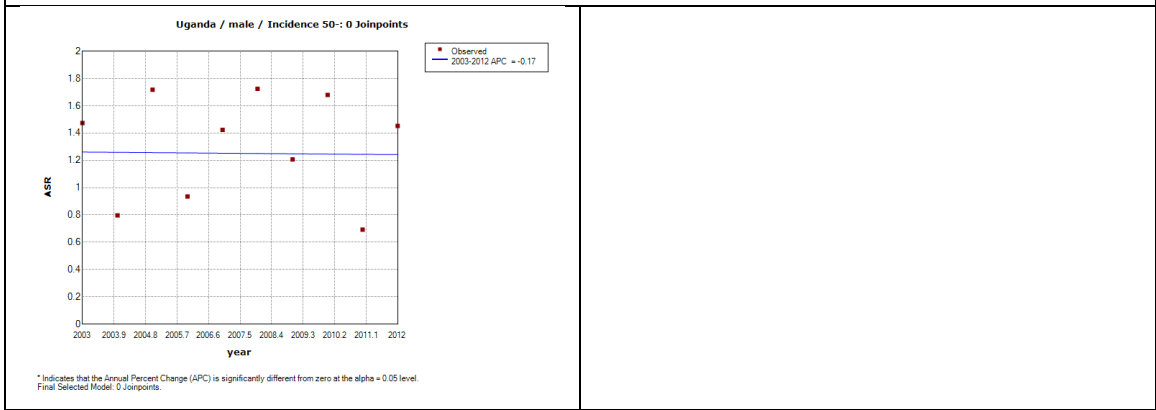

f.) Incidence female below 50 years old

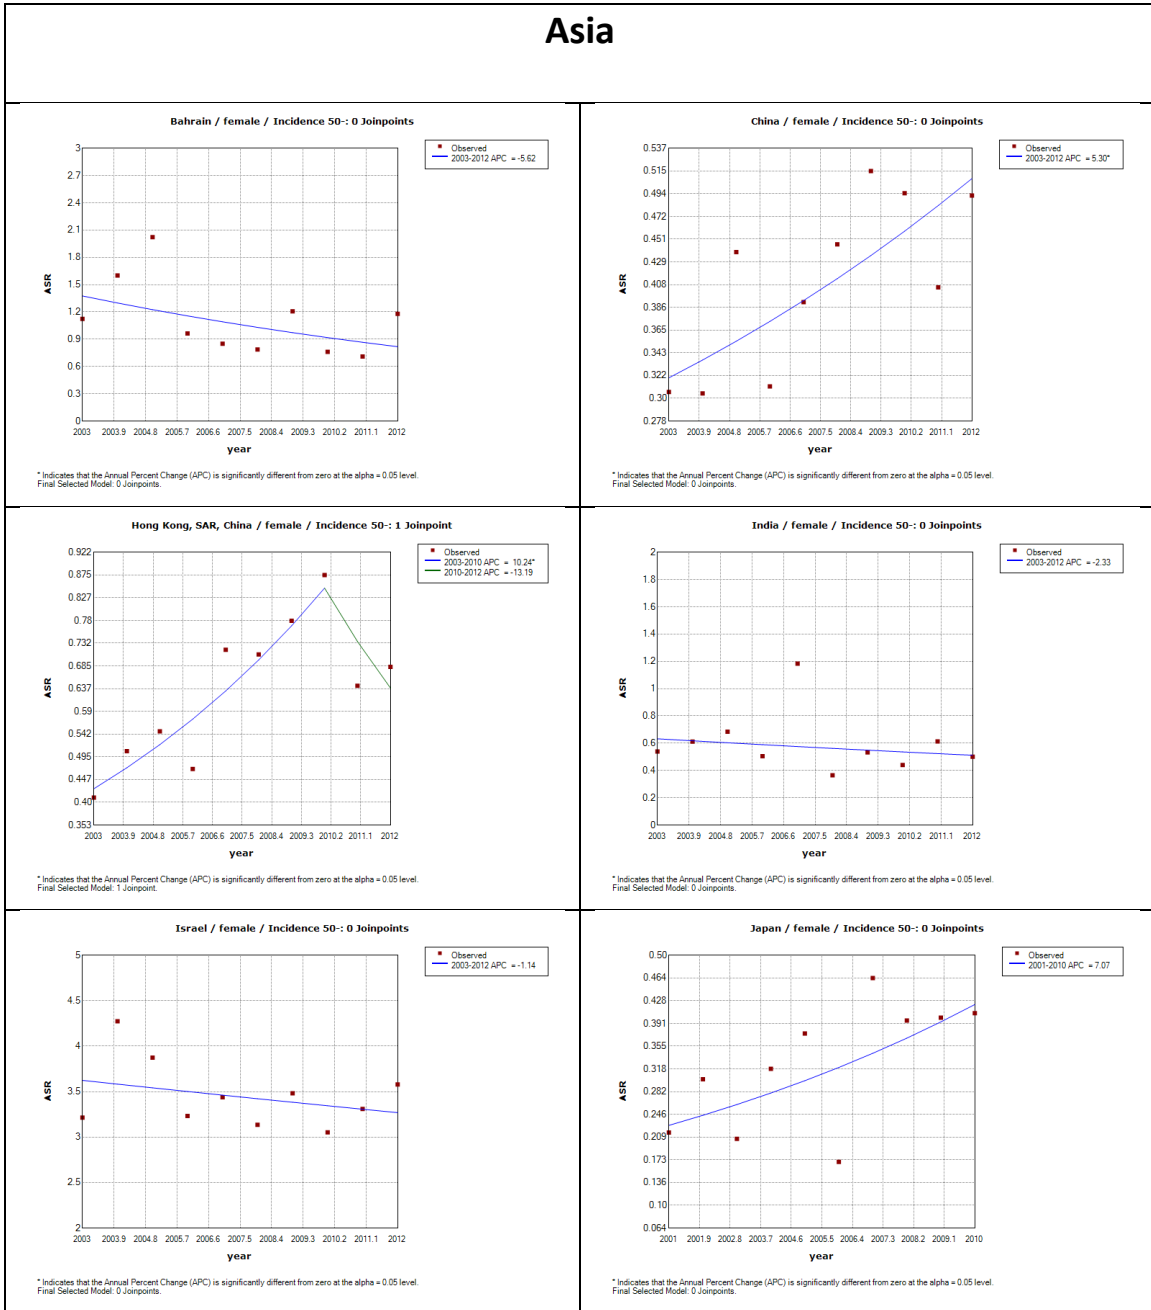

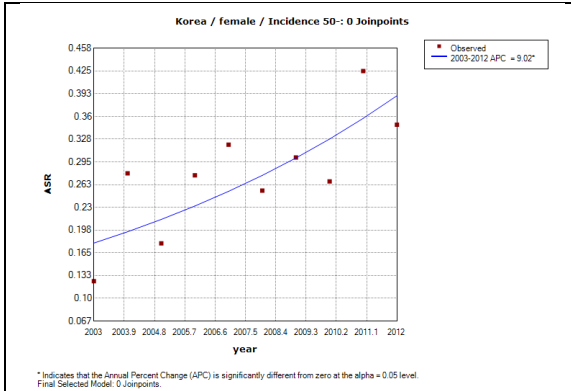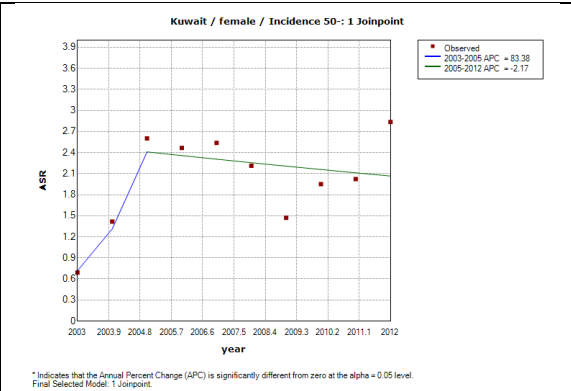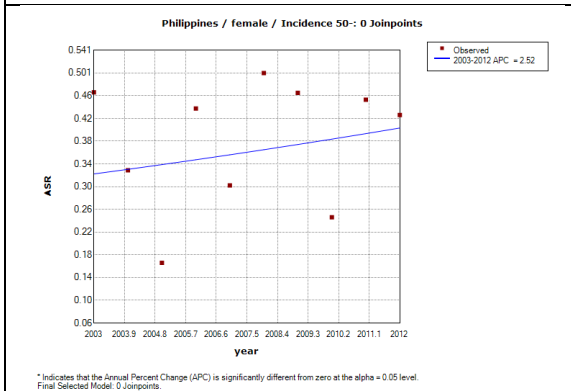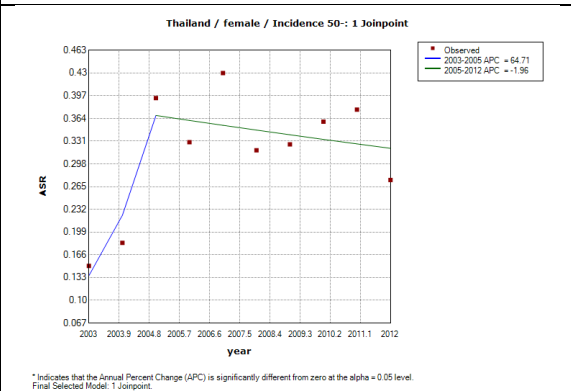

## Oceania

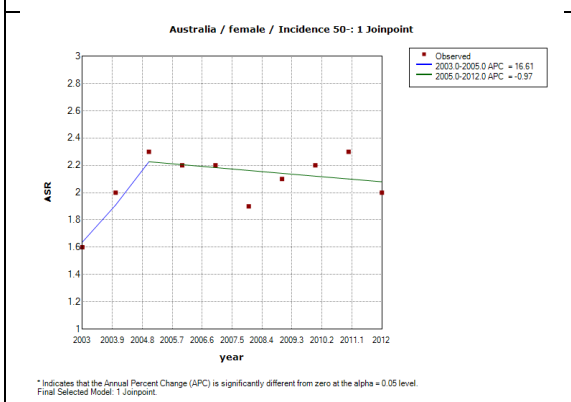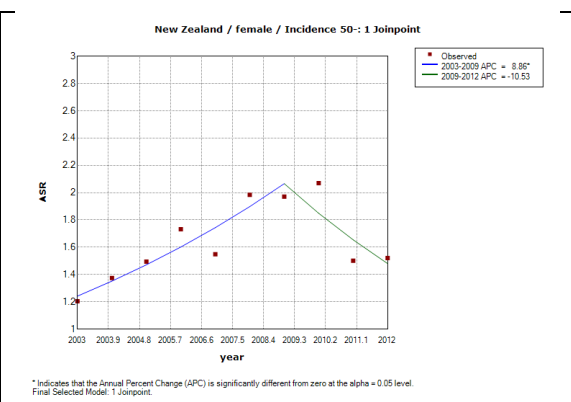

# North America

Canada / female / Incidence 50-: 1 Joinpoint

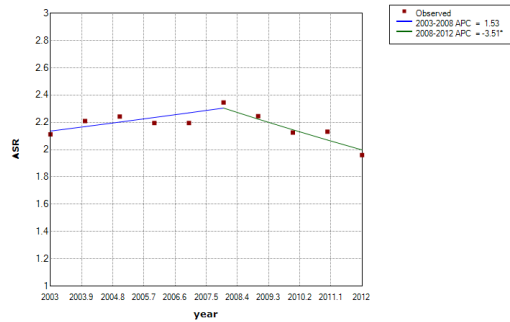

\* Indicates that the Annual Percent Change (APC) is significantly different from zero at the alpha = 0.05 level.  
Final Selected Model: 1 Joinpoint.

USA / female / Incidence 50-: 0 Joinpoints

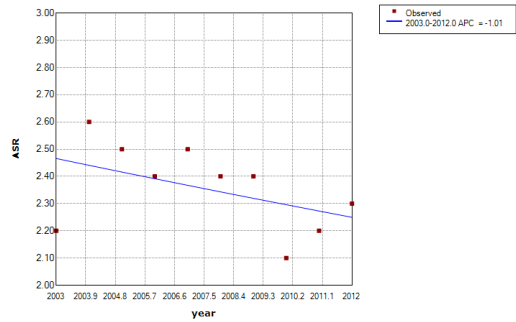

\* Indicates that the Annual Percent Change (APC) is significantly different from zero at the alpha = 0.05 level.  
Final Selected Model: 0 Joinpoints.

USA Black / female / Incidence 50-: 0 Joinpoints

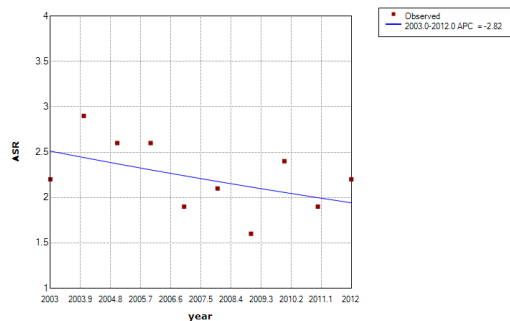

\* Indicates that the Annual Percent Change (APC) is significantly different from zero at the alpha = 0.05 level.  
Final Selected Model: 0 Joinpoints.

USA White / female / Incidence 50-: 1 Joinpoint

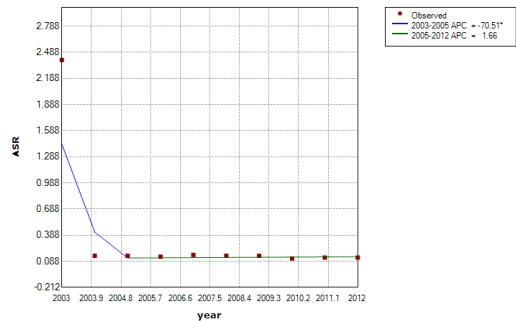

\* Indicates that the Annual Percent Change (APC) is significantly different from zero at the alpha = 0.05 level.  
Final Selected Model: 1 Joinpoint.

# South America

Brazil / female / Incidence 50-: 0 Joinpoints

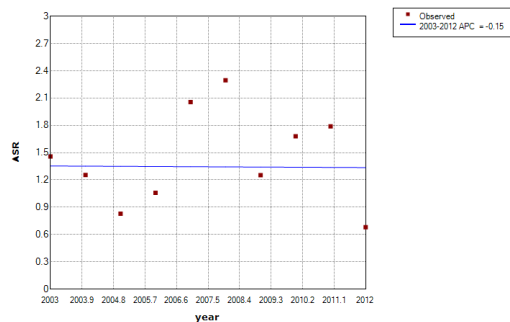

\* Indicates that the Annual Percent Change (APC) is significantly different from zero at the alpha = 0.05 level.  
Final Selected Model: 0 Joinpoints.

Chile / female / Incidence 50-: 0 Joinpoints

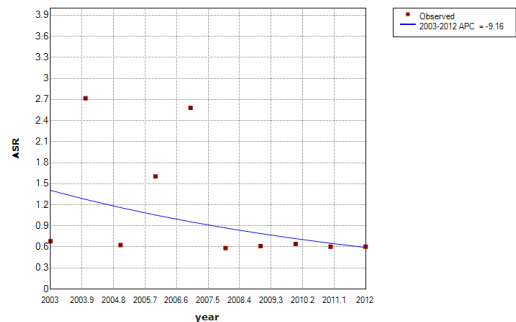

\* Indicates that the Annual Percent Change (APC) is significantly different from zero at the alpha = 0.05 level.  
Final Selected Model: 0 Joinpoints.



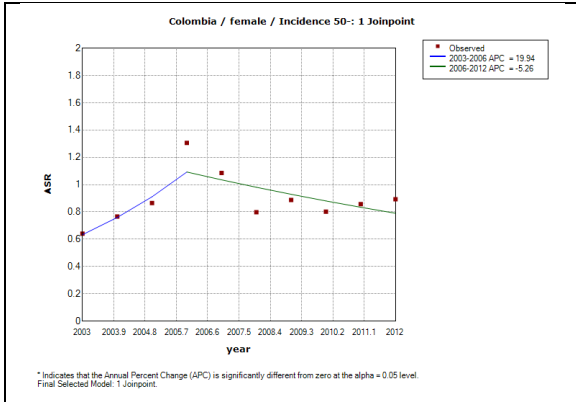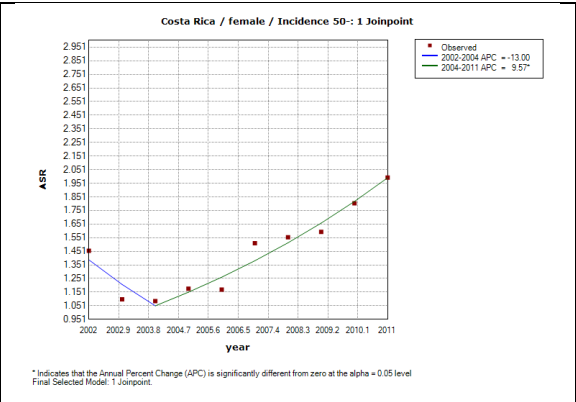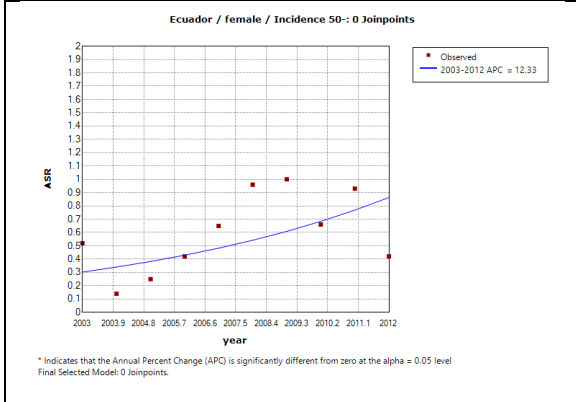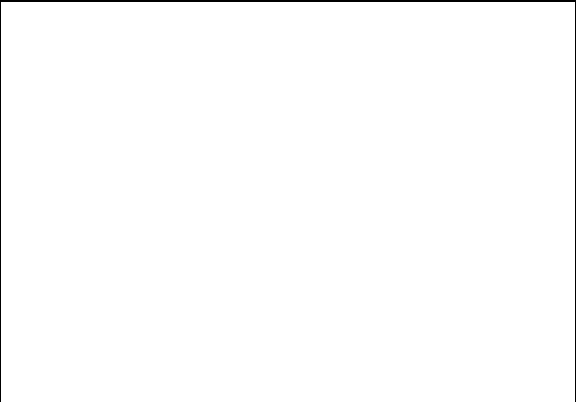

## Northern Europe

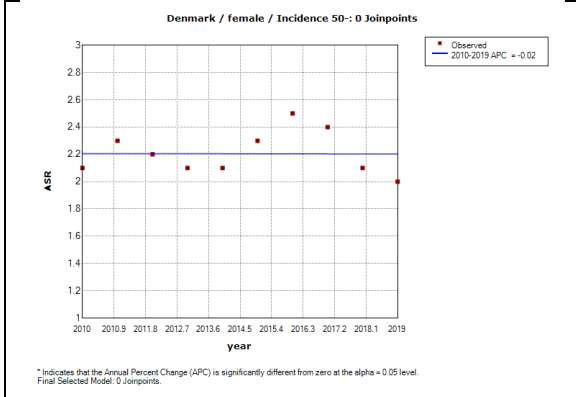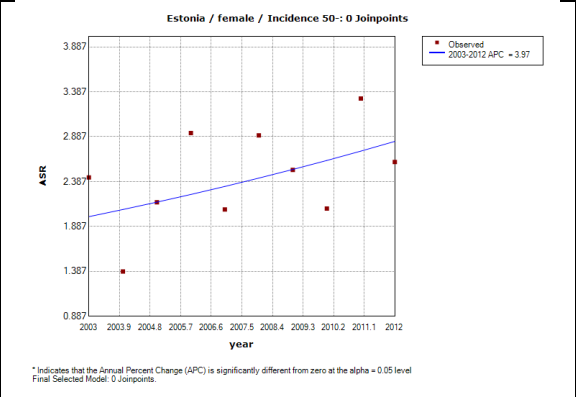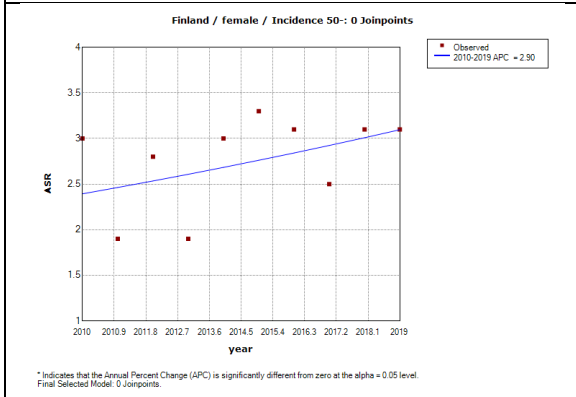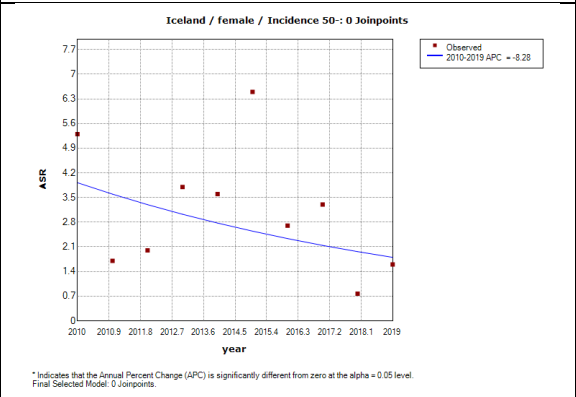

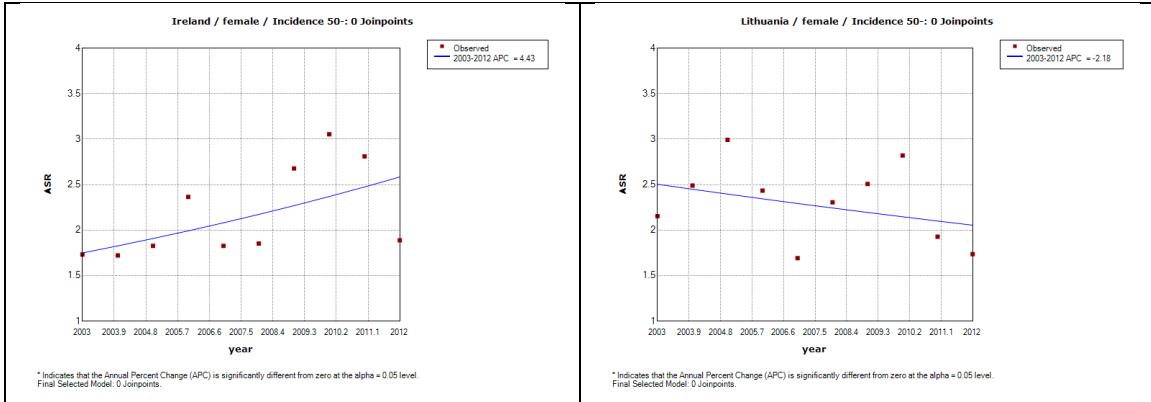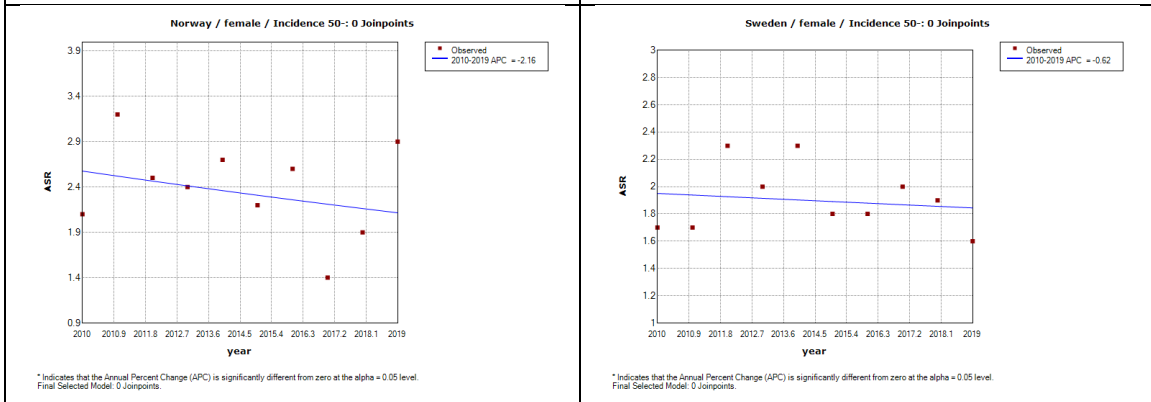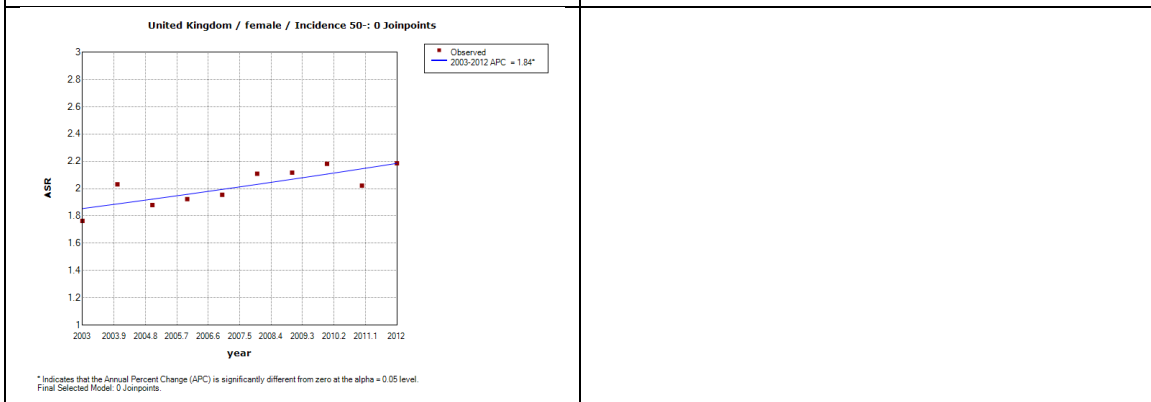

## Western Europe

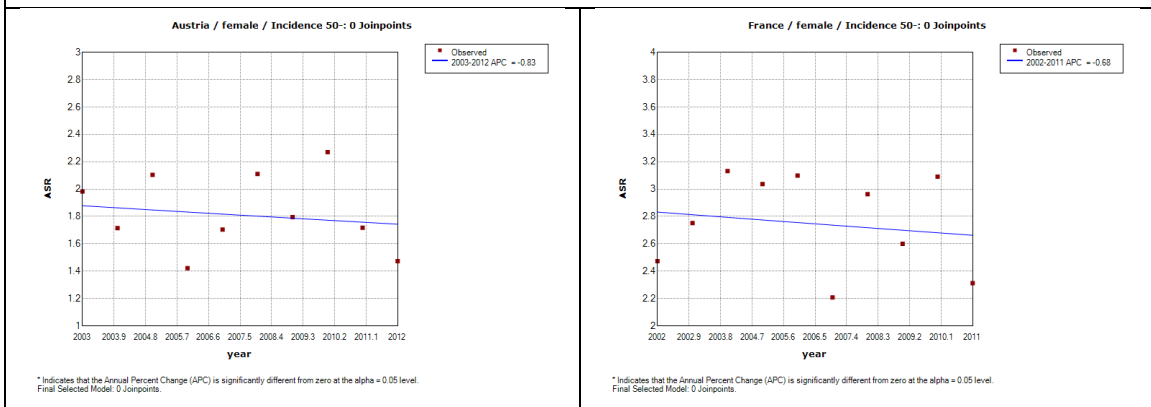

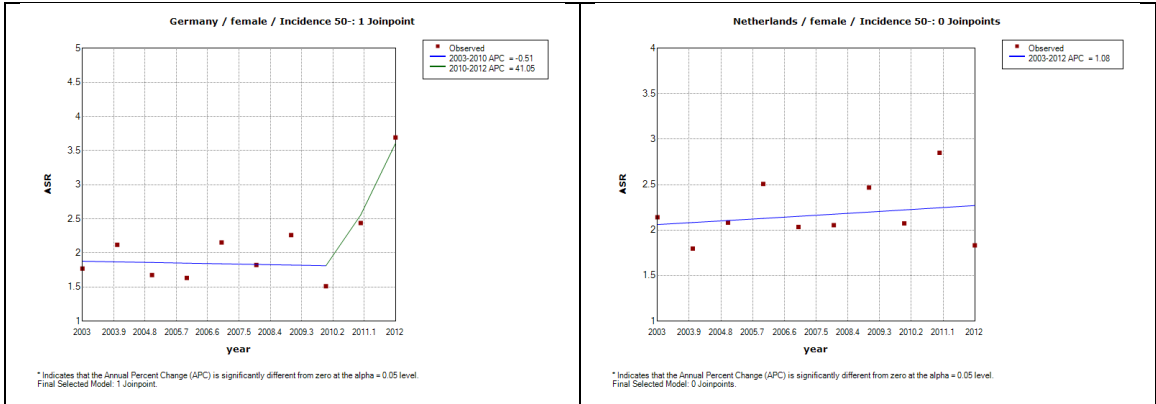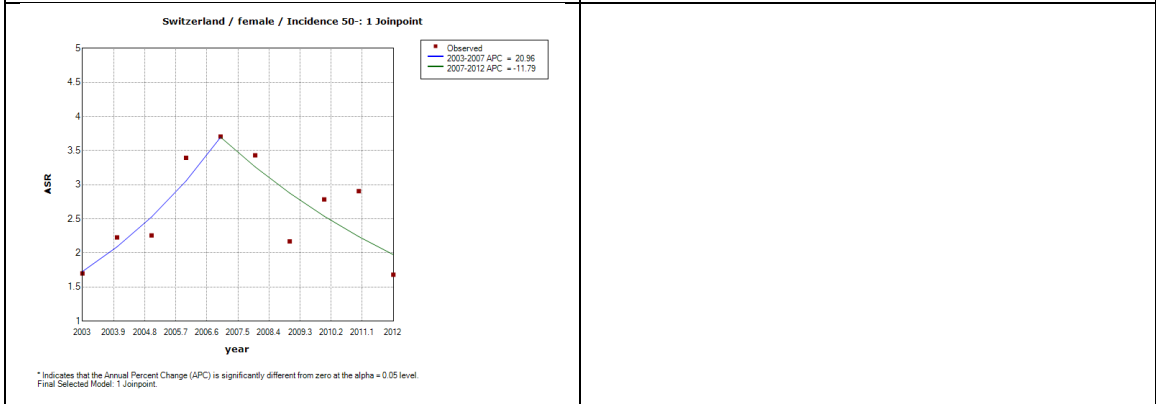

## Southern Europe

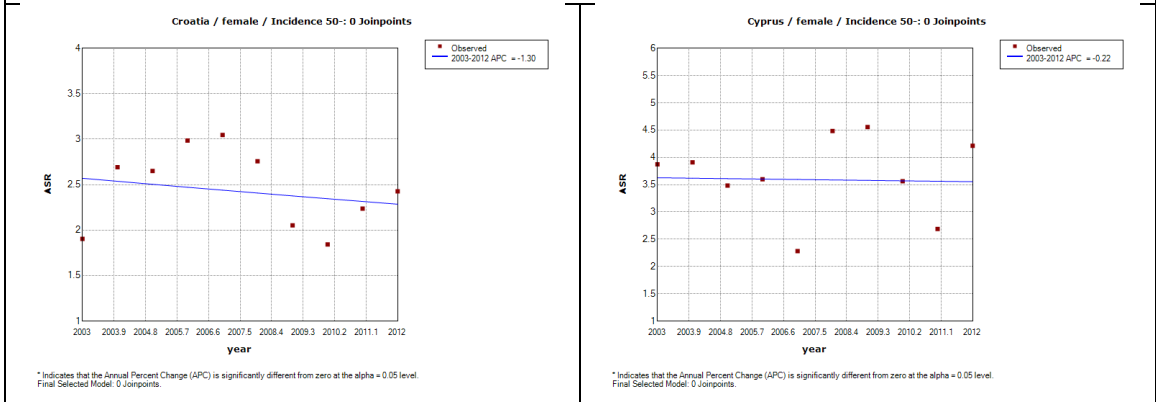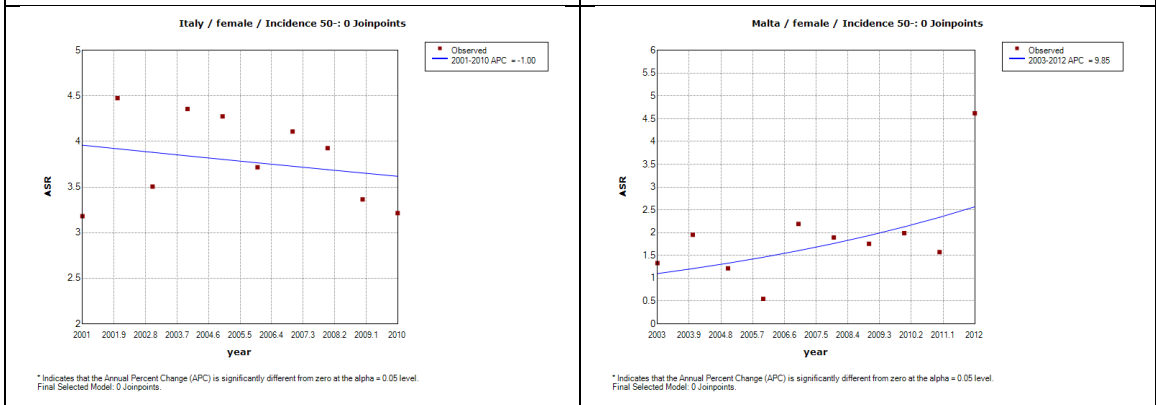

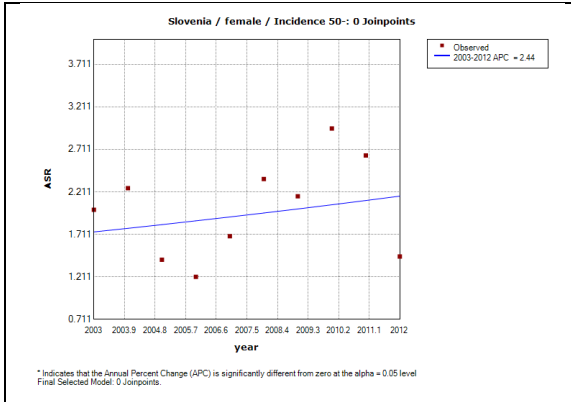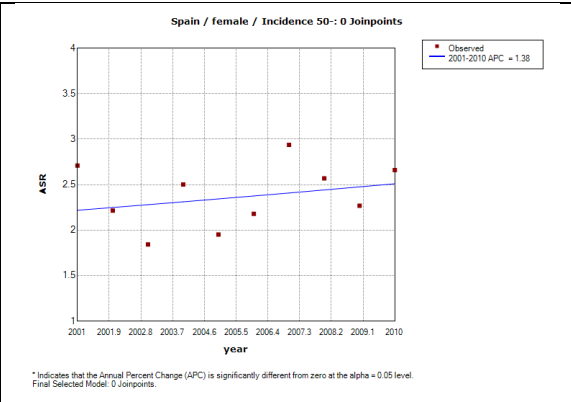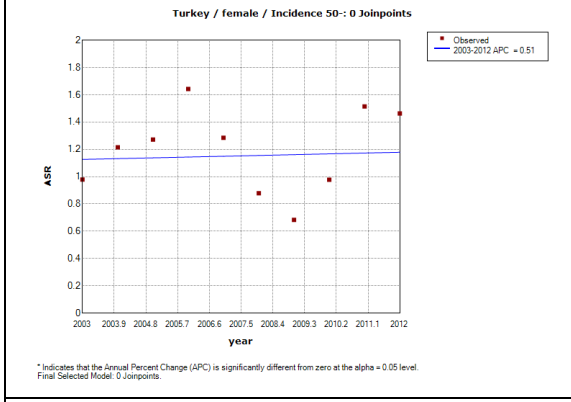

## Eastern Europe

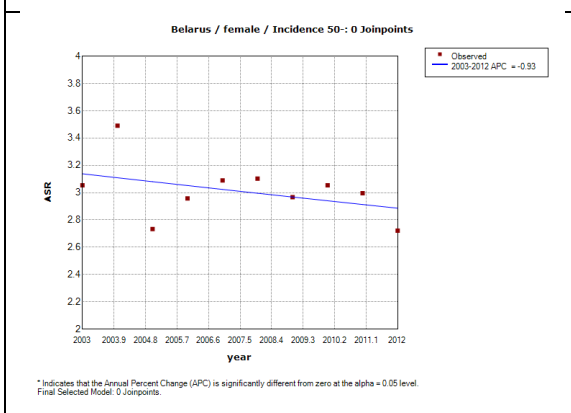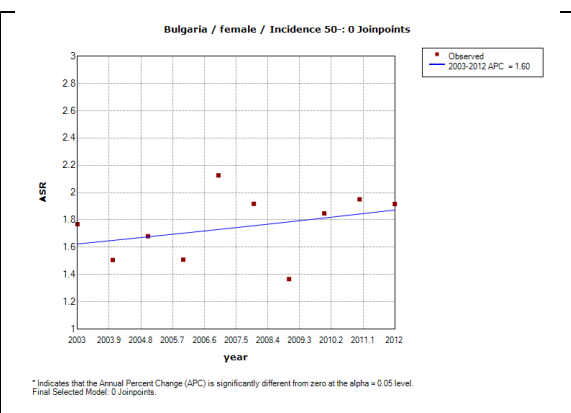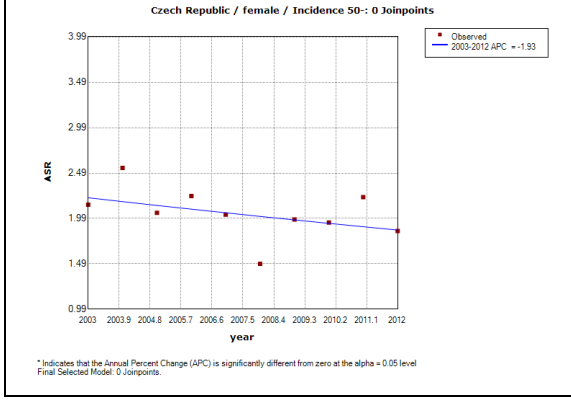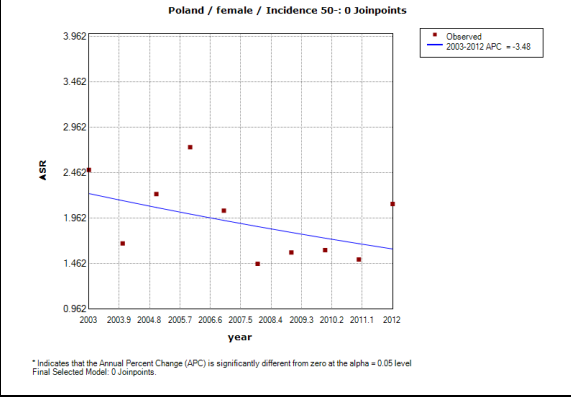

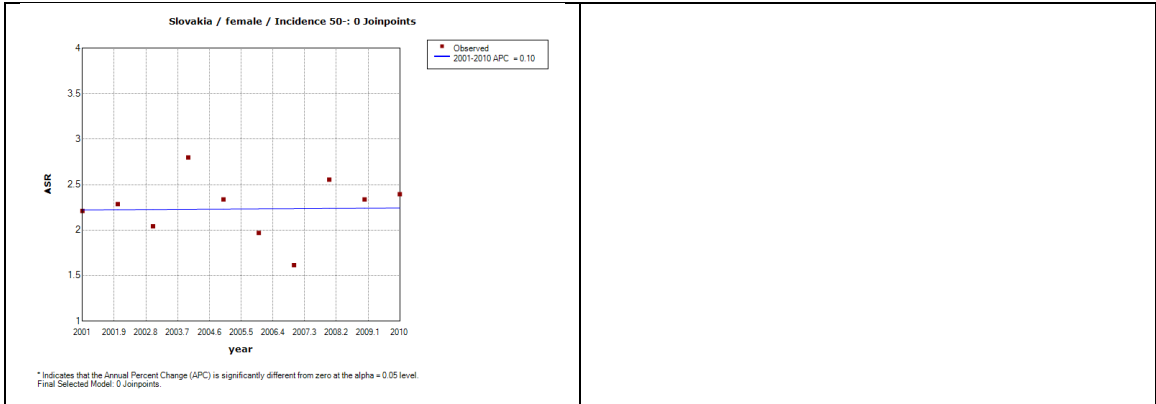

## Africa

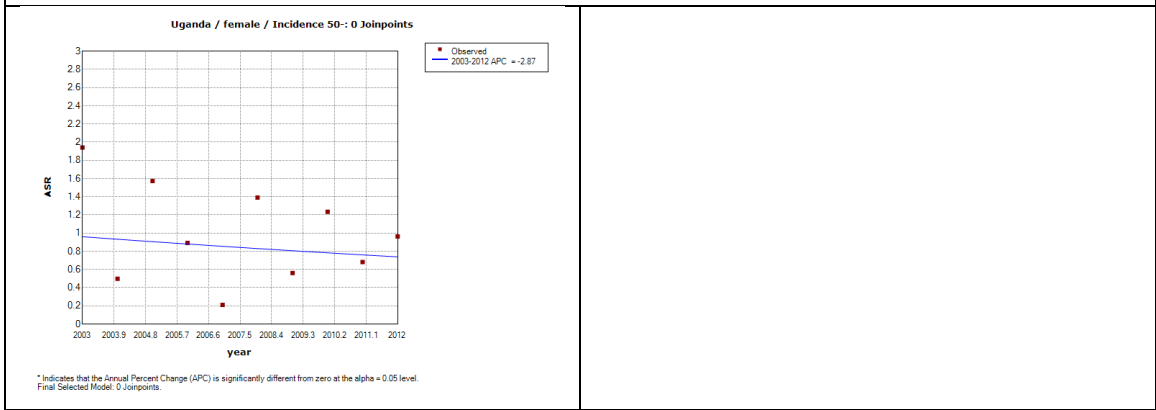

g.) Incidence male above 50 years old

## Asia

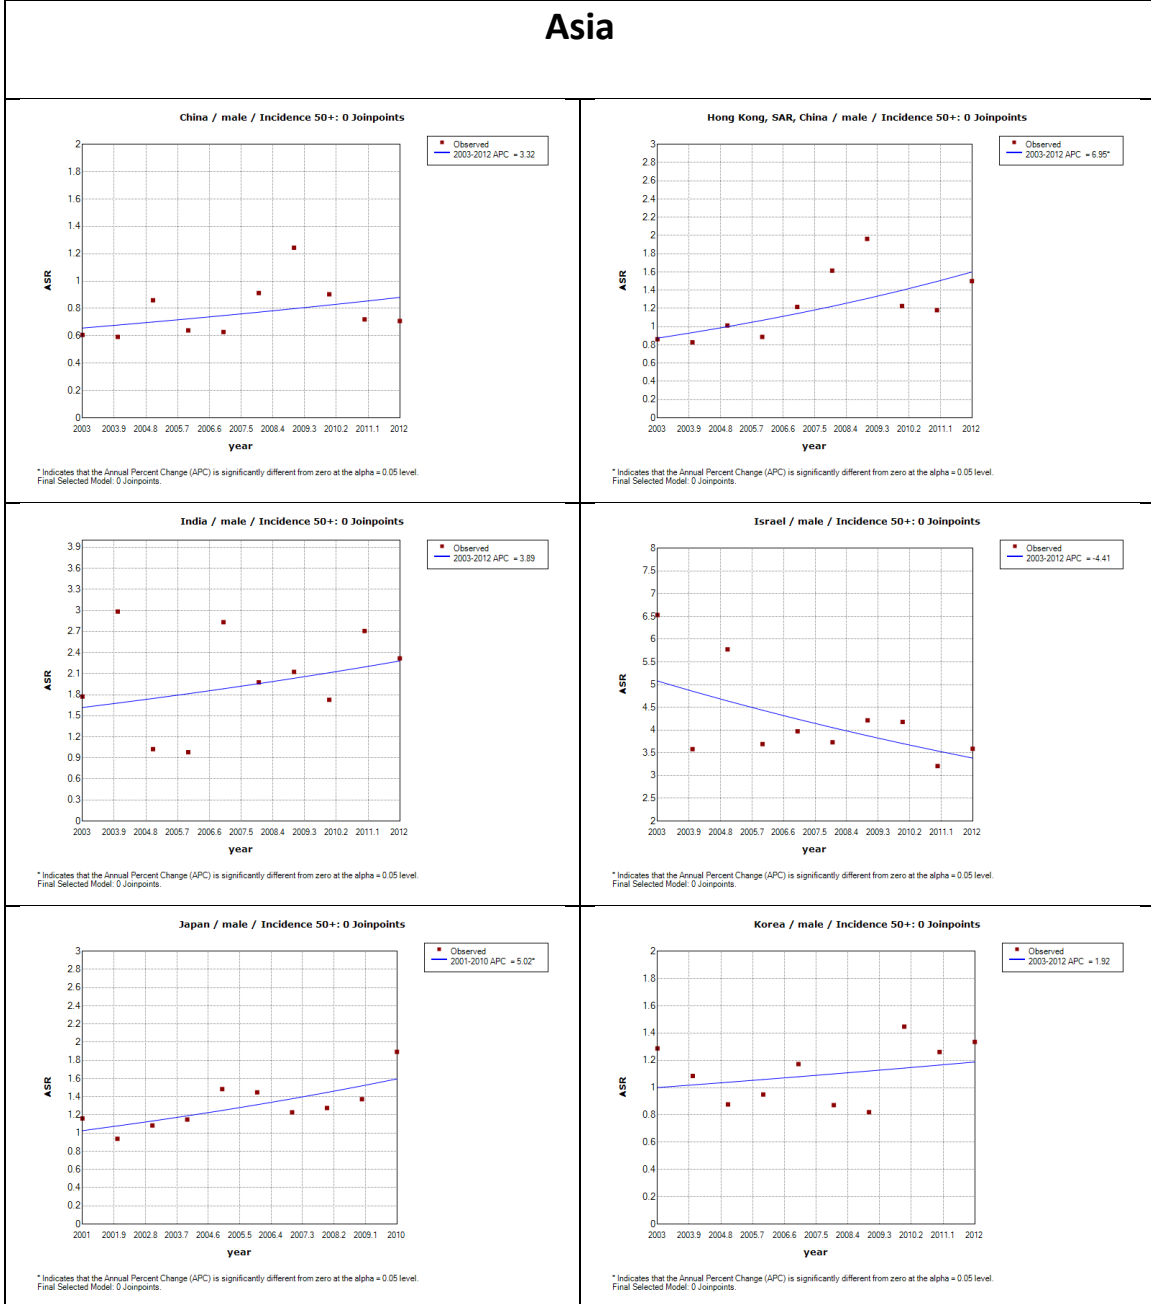

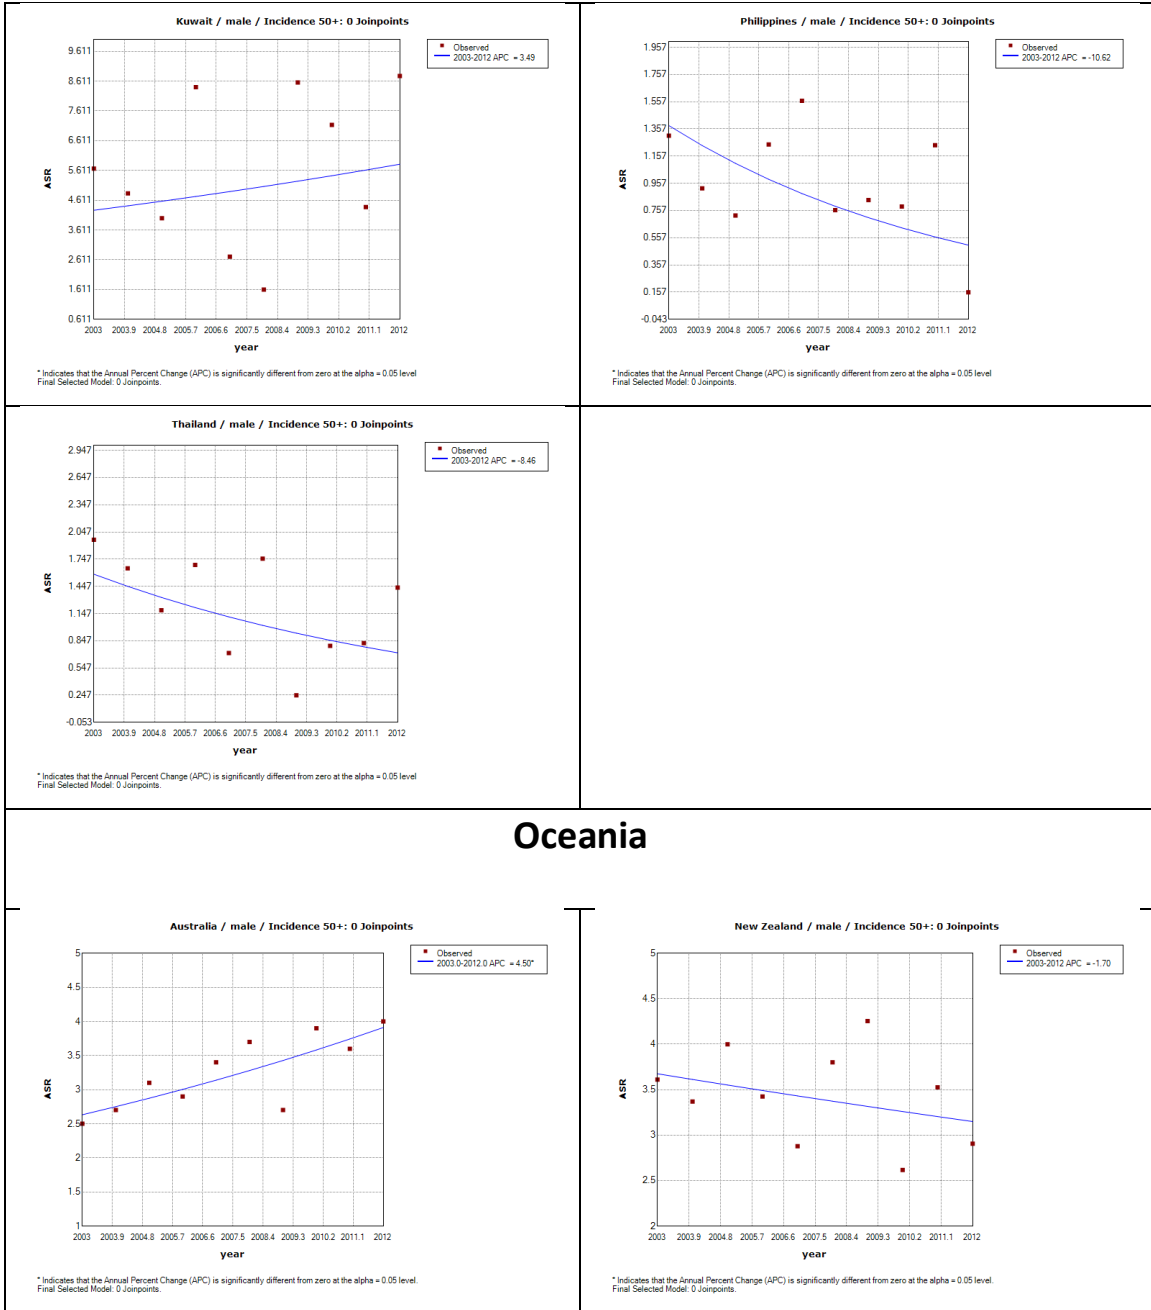

# North America

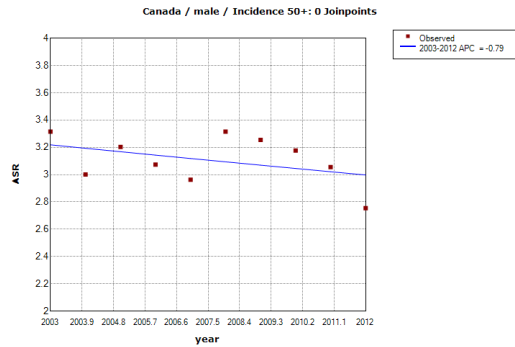

\* Indicates that the Annual Percent Change (APC) is significantly different from zero at the alpha = 0.05 level. Final Selected Model: 0 Joinpoints.

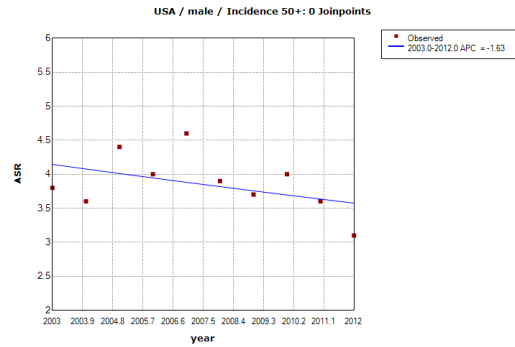

\* Indicates that the Annual Percent Change (APC) is significantly different from zero at the alpha = 0.05 level. Final Selected Model: 0 Joinpoints.

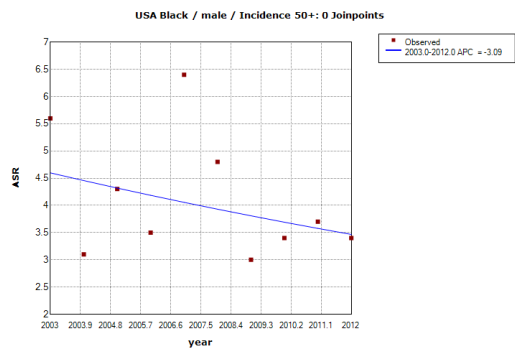

\* Indicates that the Annual Percent Change (APC) is significantly different from zero at the alpha = 0.05 level. Final Selected Model: 0 Joinpoints.

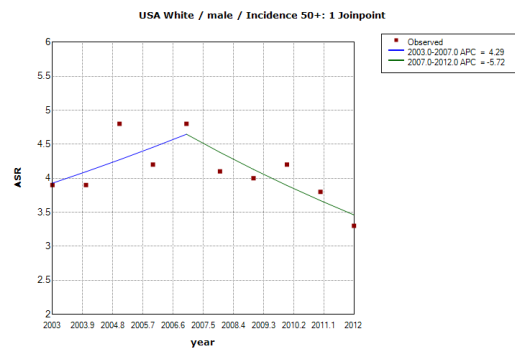

\* Indicates that the Annual Percent Change (APC) is significantly different from zero at the alpha = 0.05 level. Final Selected Model: 1 Joinpoint.

# South America

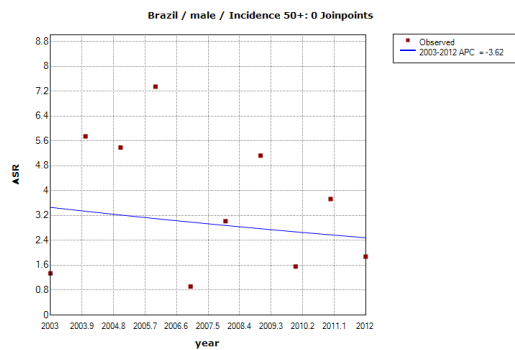

\* Indicates that the Annual Percent Change (APC) is significantly different from zero at the alpha = 0.05 level. Final Selected Model: 0 Joinpoints.

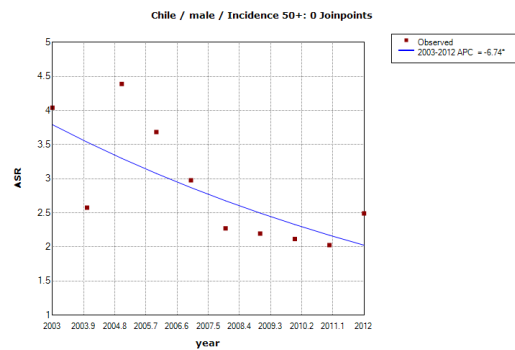

\* Indicates that the Annual Percent Change (APC) is significantly different from zero at the alpha = 0.05 level. Final Selected Model: 0 Joinpoints.



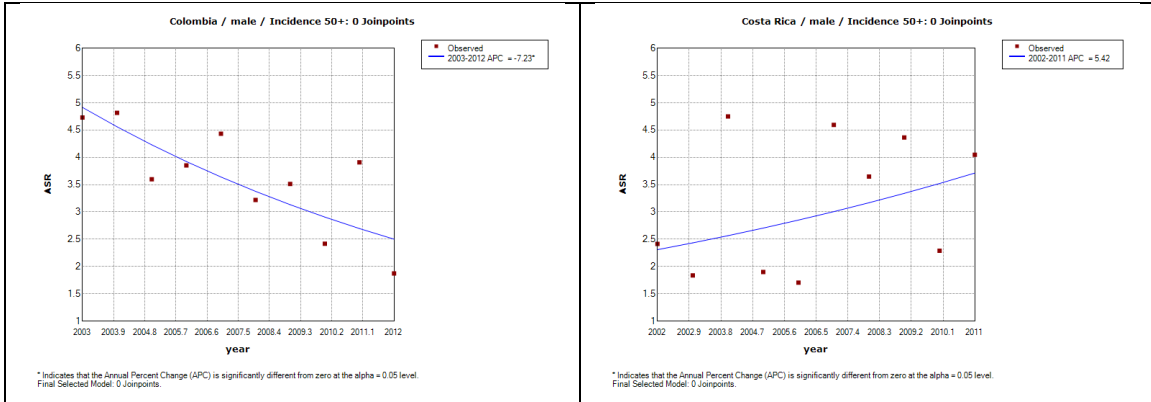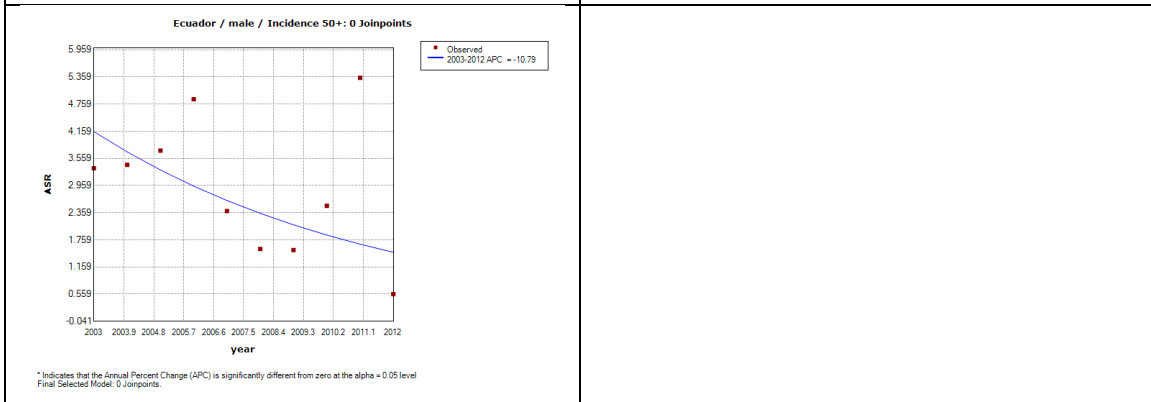

## Northern Europe

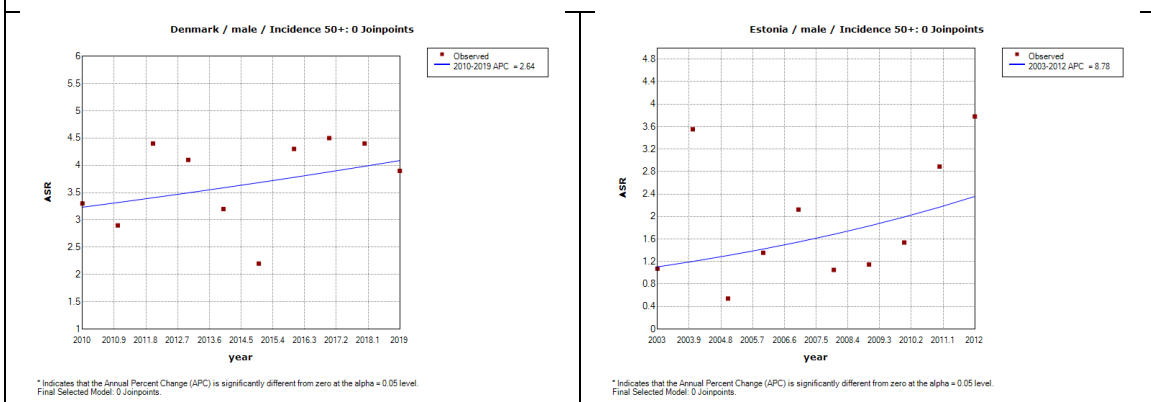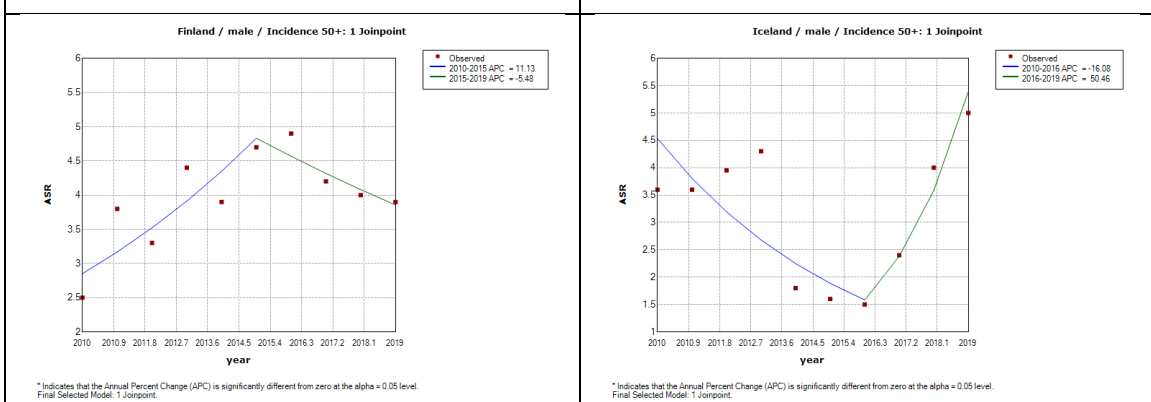

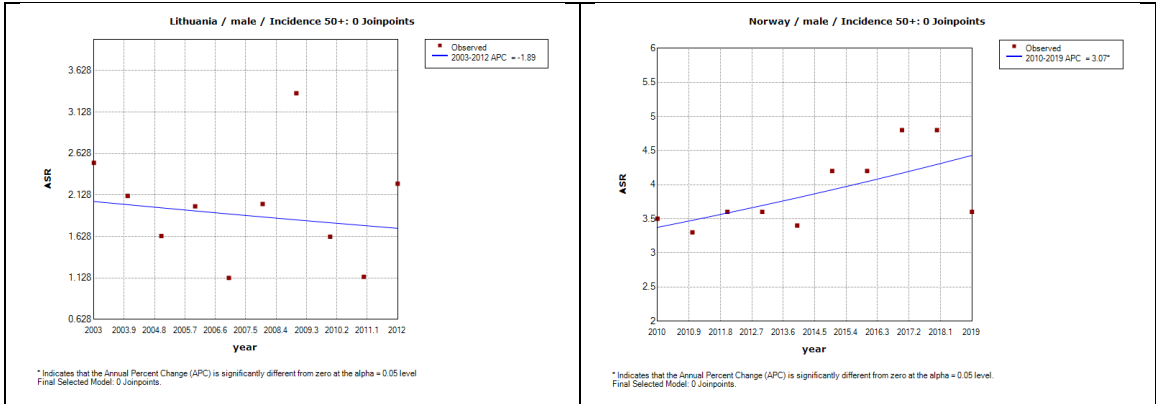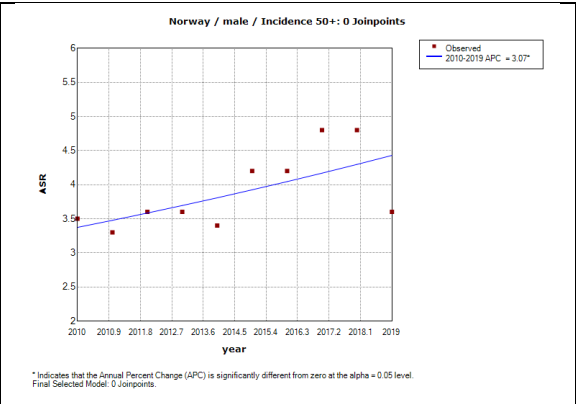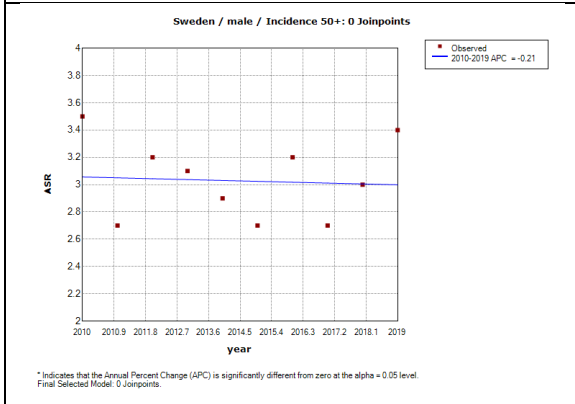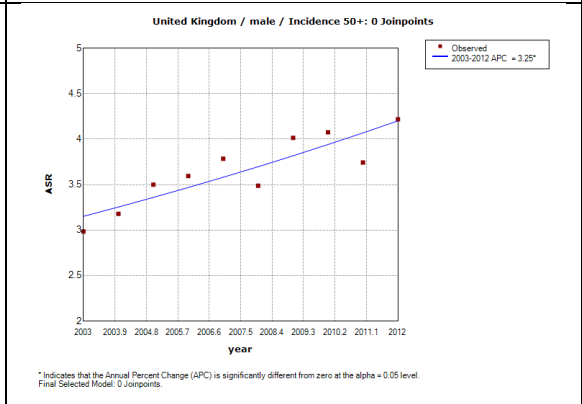

**Western Europe**

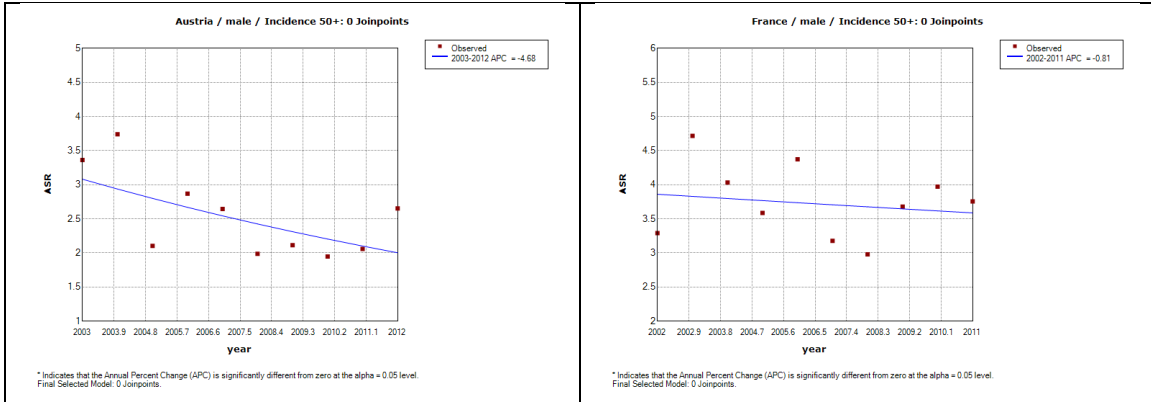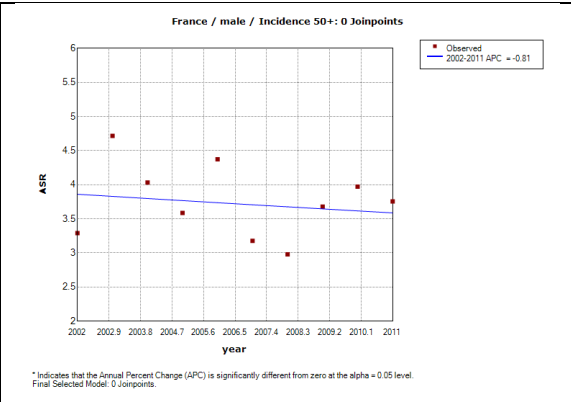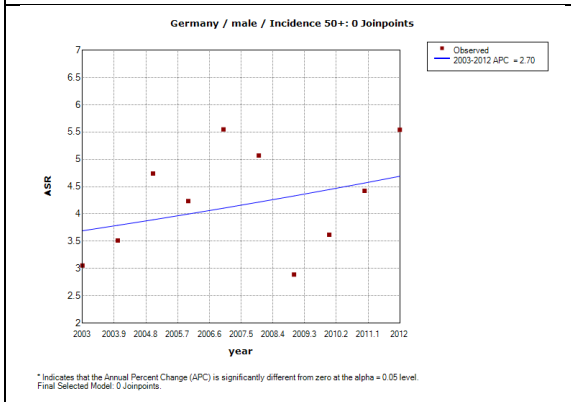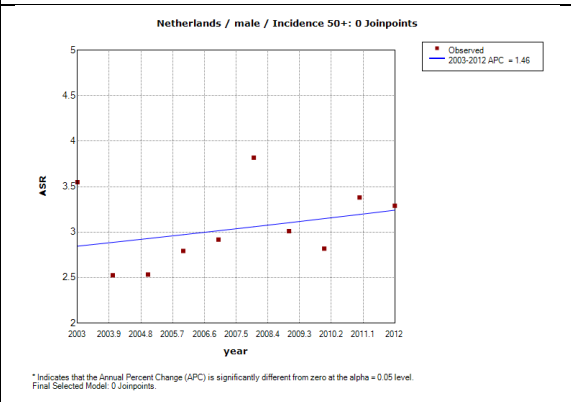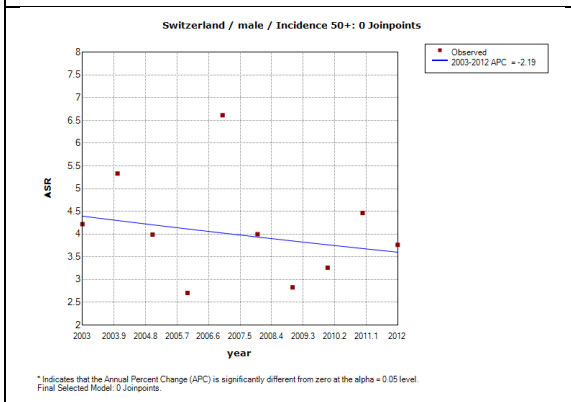

## Southern Europe

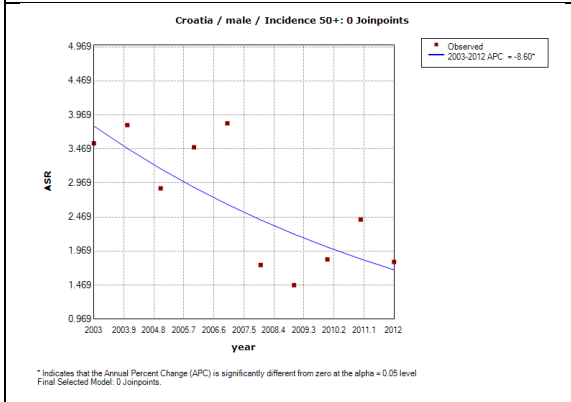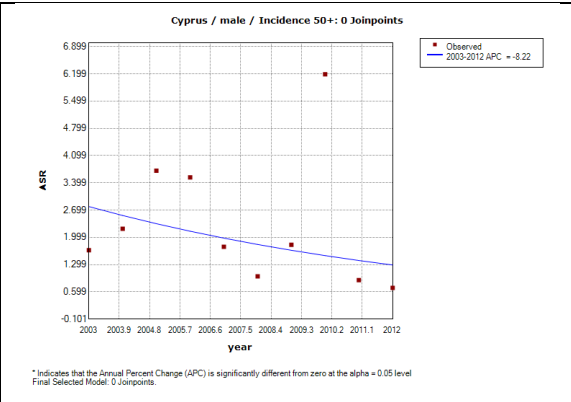

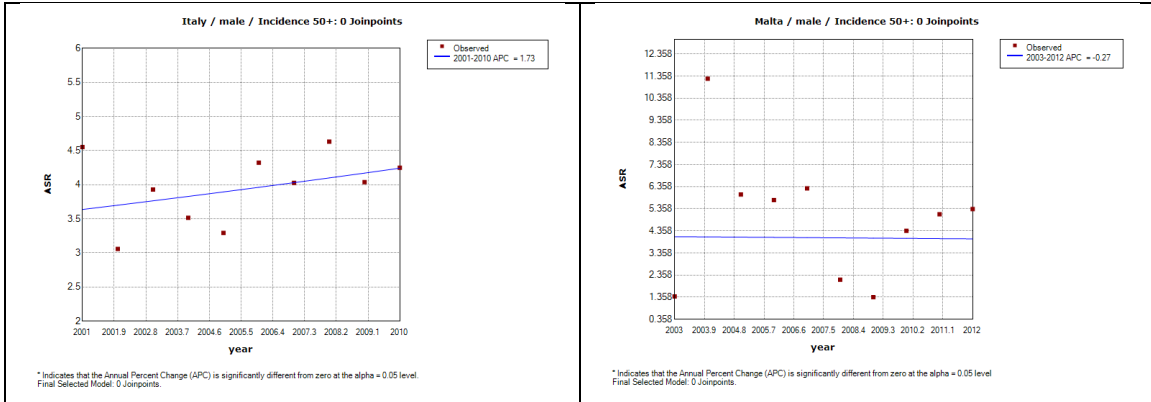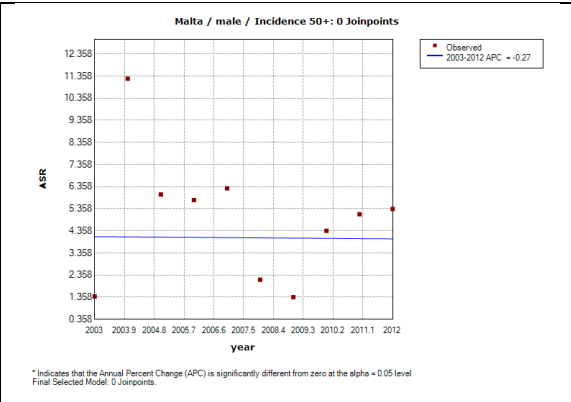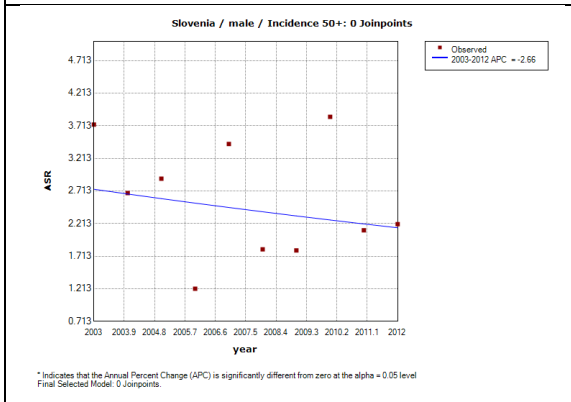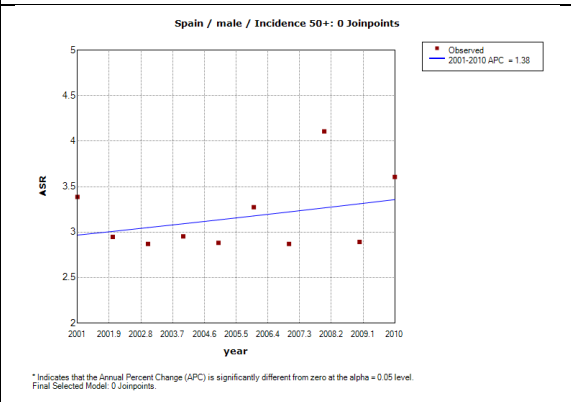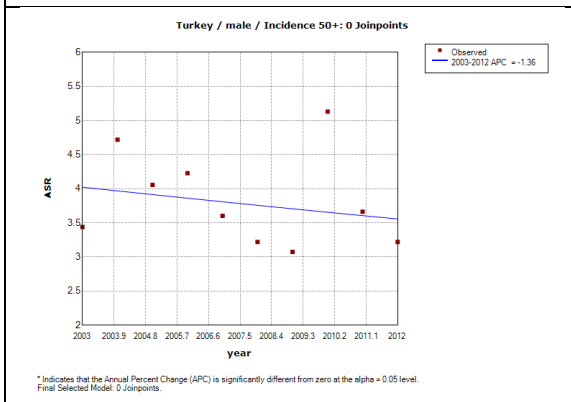

## Eastern Europe

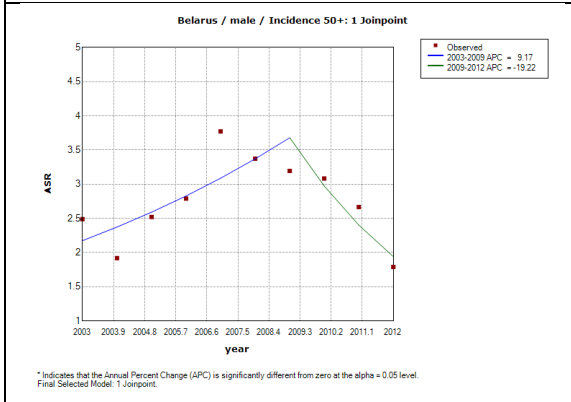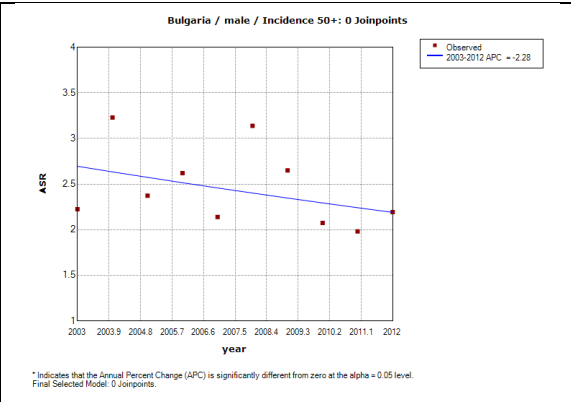

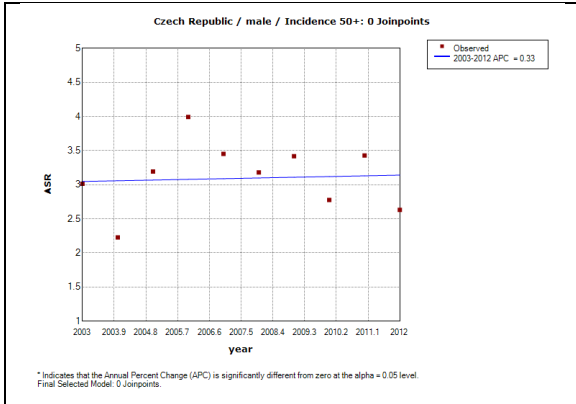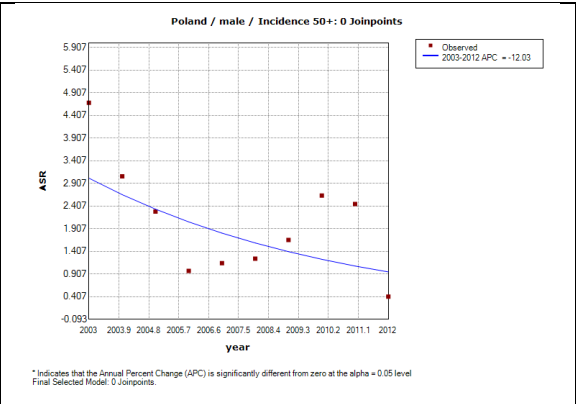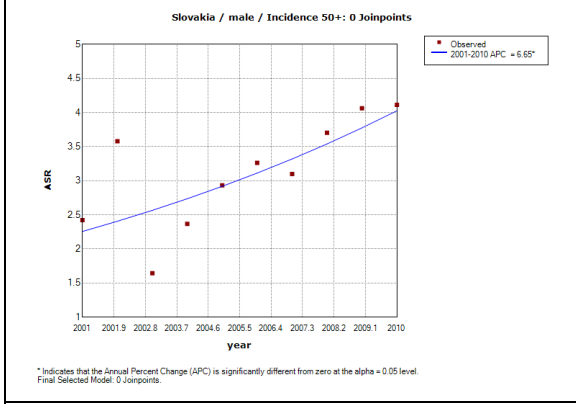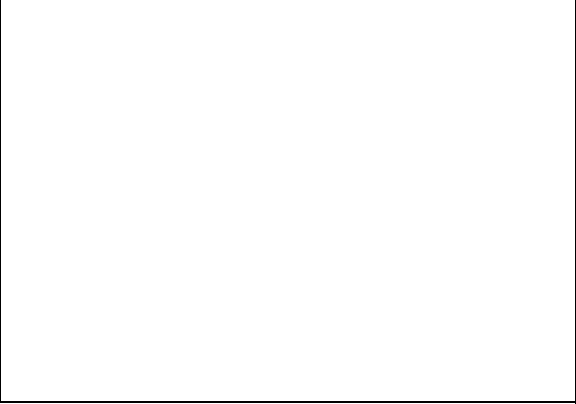

## Africa

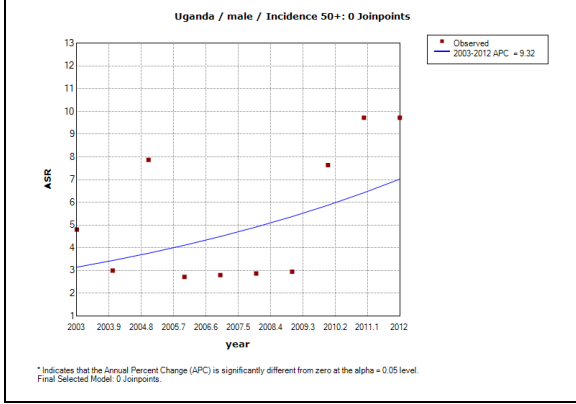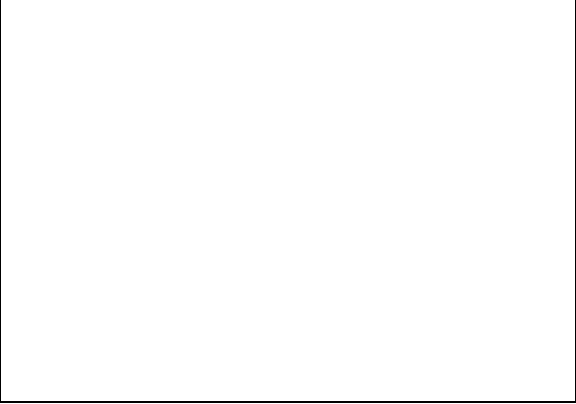

h.) Incidence female above 50 years old

## Asia

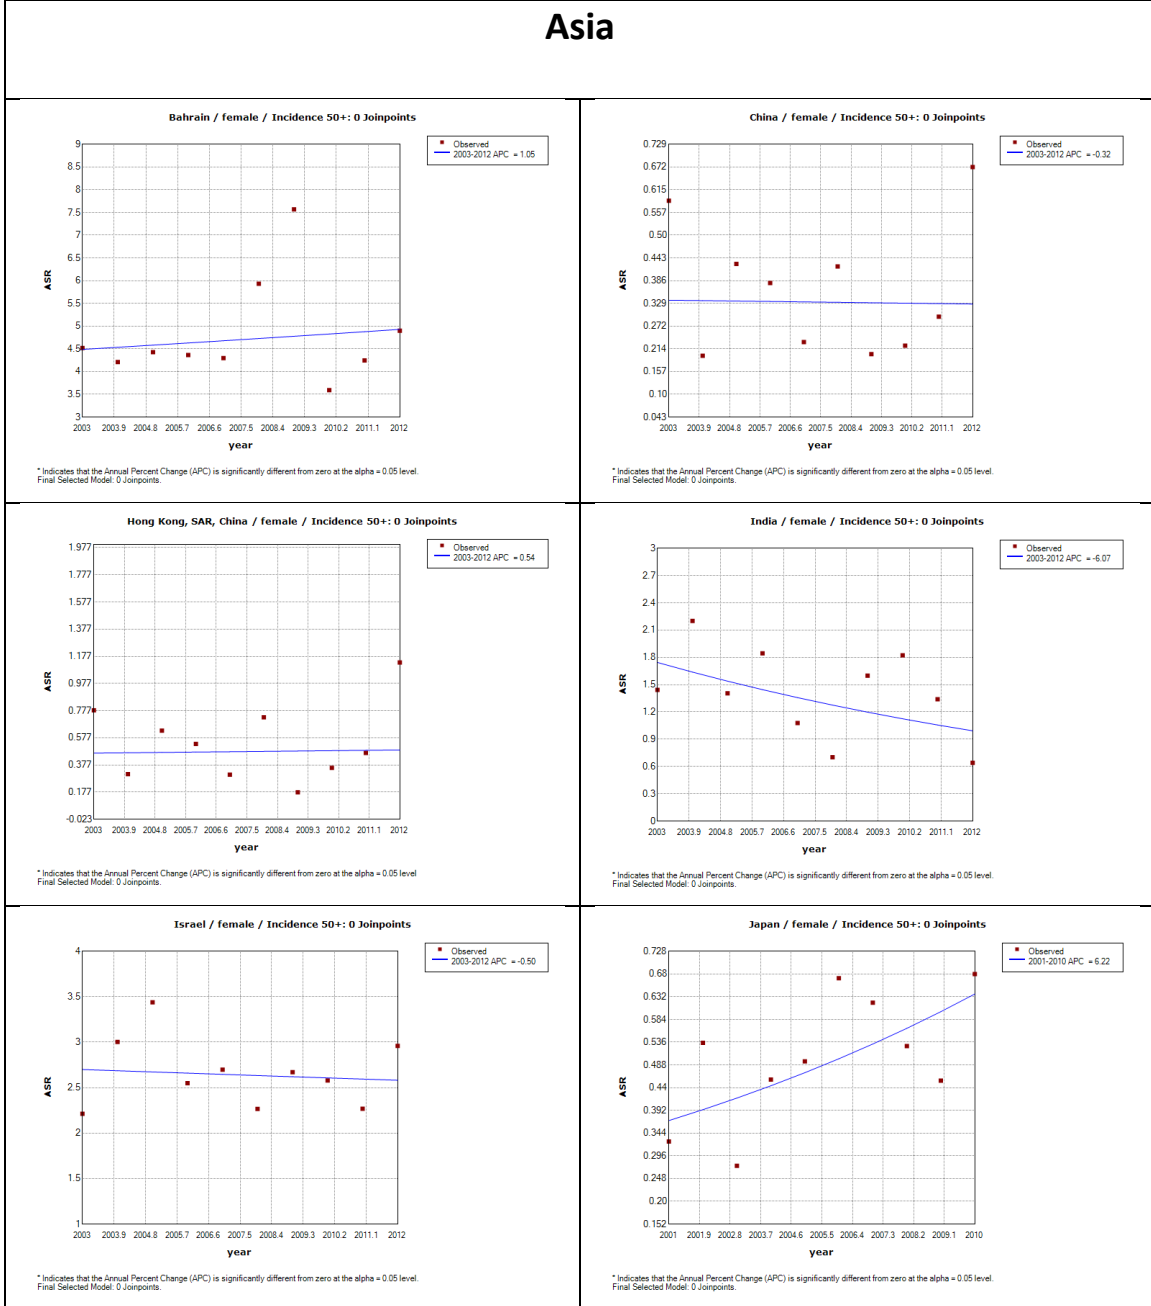

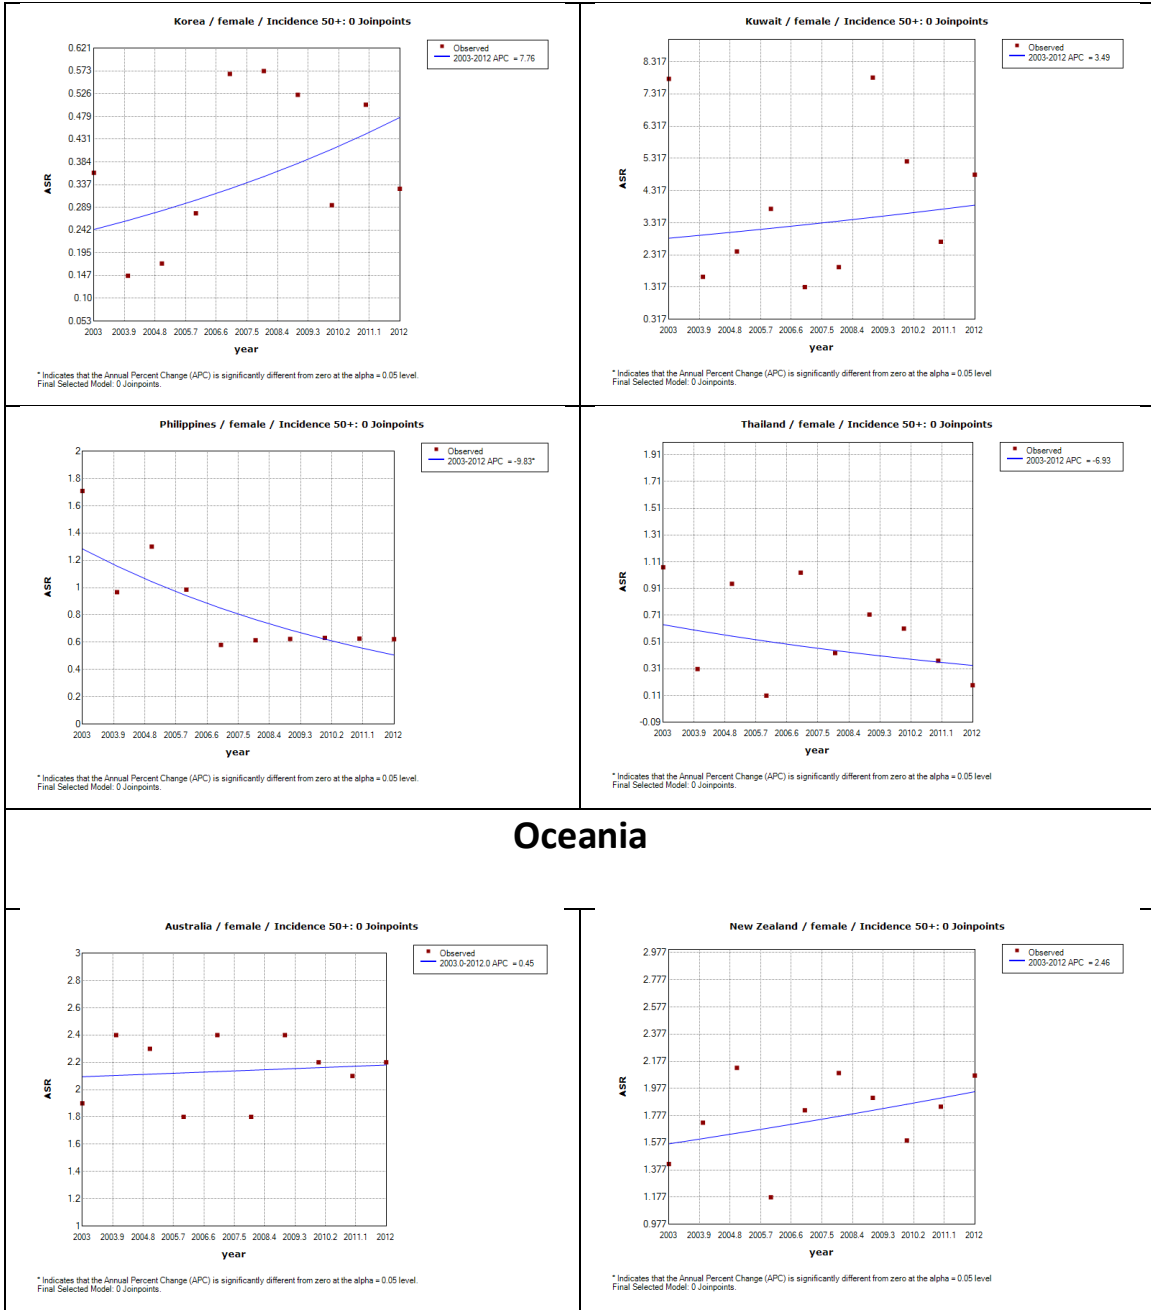

# North America

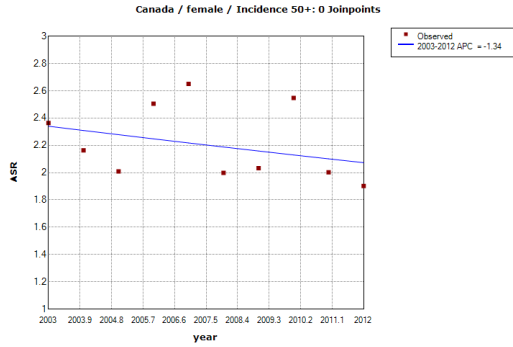

\* Indicates that the Annual Percent Change (APC) is significantly different from zero at the alpha = 0.05 level.  
Final Selected Model: 0 Joinpoints.

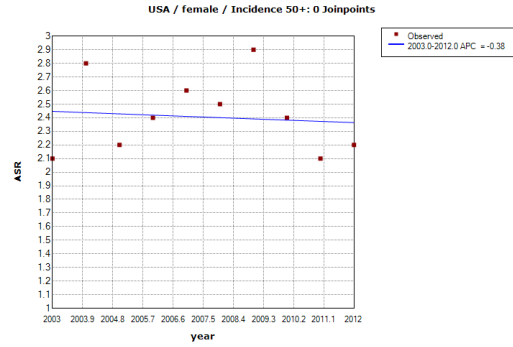

\* Indicates that the Annual Percent Change (APC) is significantly different from zero at the alpha = 0.05 level.  
Final Selected Model: 0 Joinpoints.

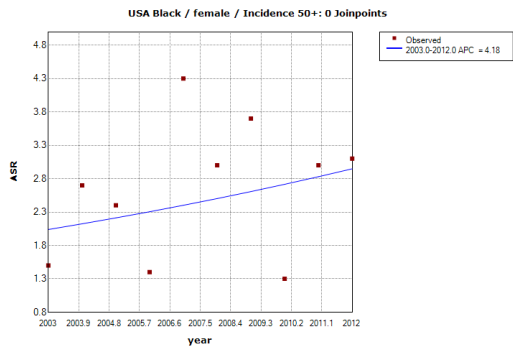

\* Indicates that the Annual Percent Change (APC) is significantly different from zero at the alpha = 0.05 level.  
Final Selected Model: 0 Joinpoints.

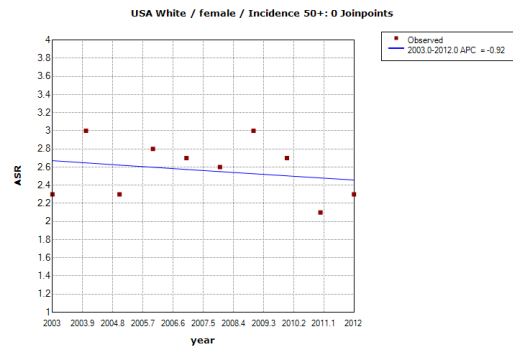

\* Indicates that the Annual Percent Change (APC) is significantly different from zero at the alpha = 0.05 level.  
Final Selected Model: 0 Joinpoints.

# South America

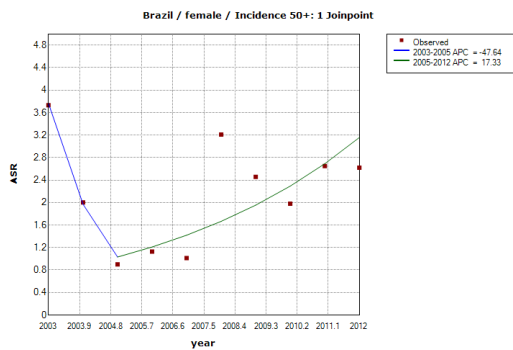

\* Indicates that the Annual Percent Change (APC) is significantly different from zero at the alpha = 0.05 level.  
Final Selected Model: 1 Joinpoint.

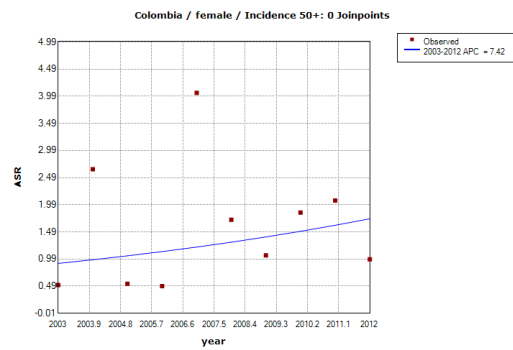

\* Indicates that the Annual Percent Change (APC) is significantly different from zero at the alpha = 0.05 level.  
Final Selected Model: 0 Joinpoints.



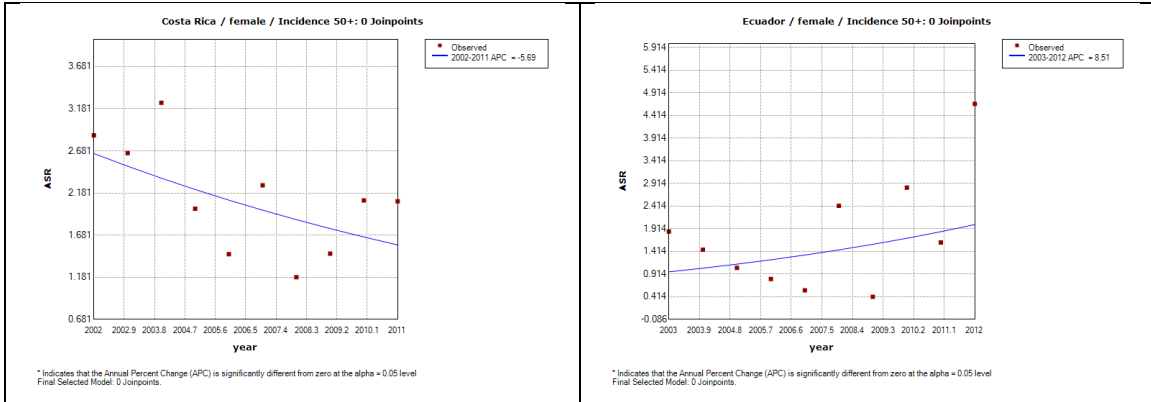

## Northern Europe

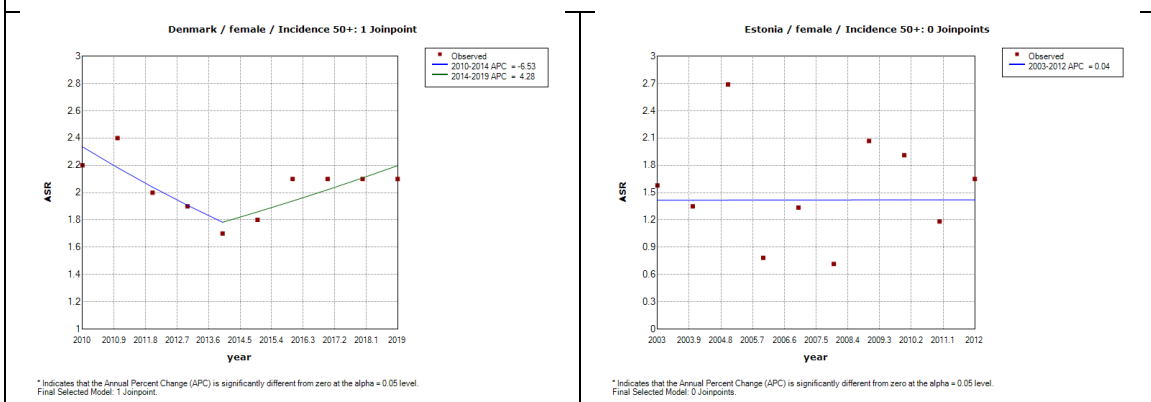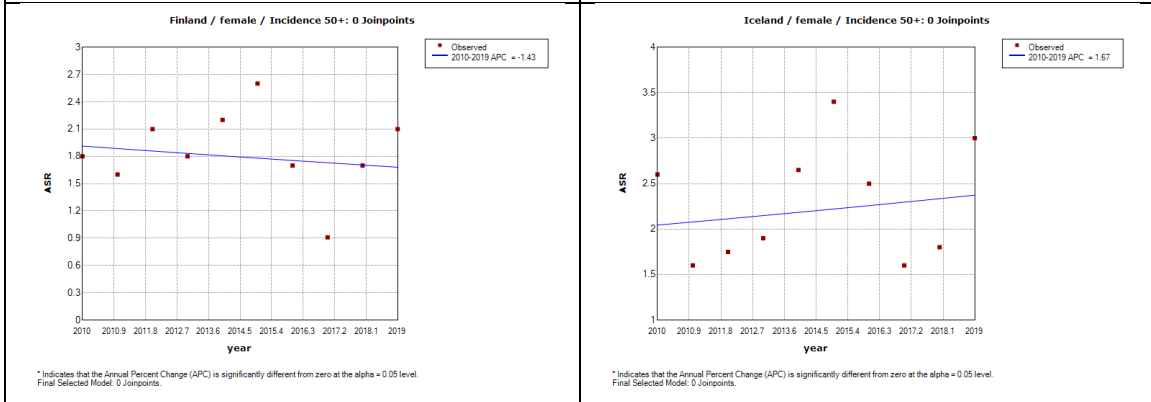

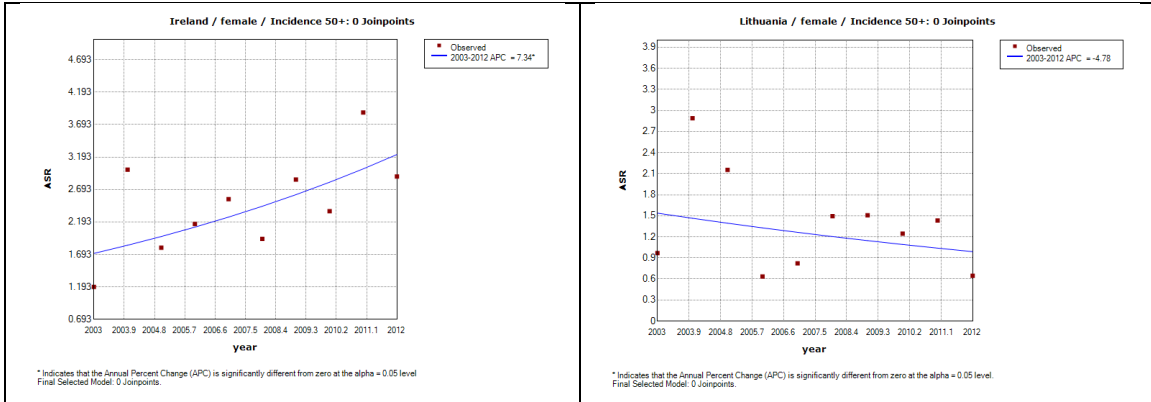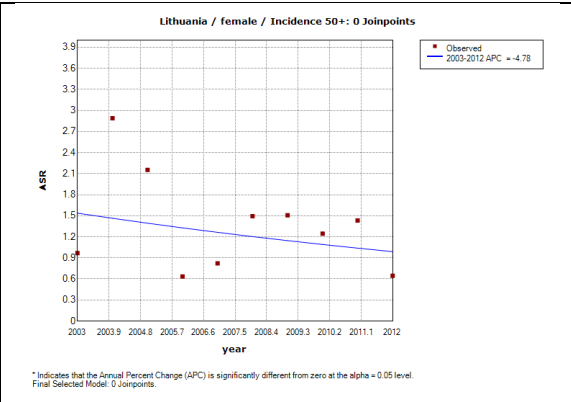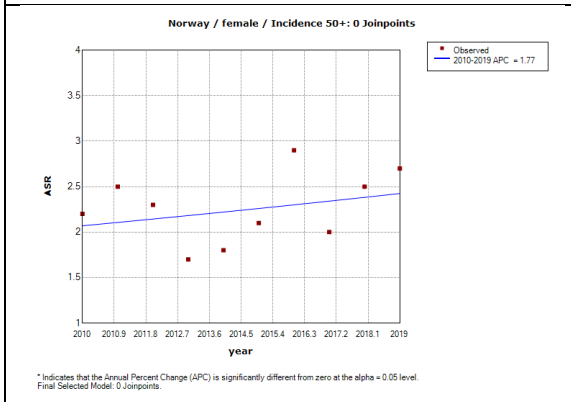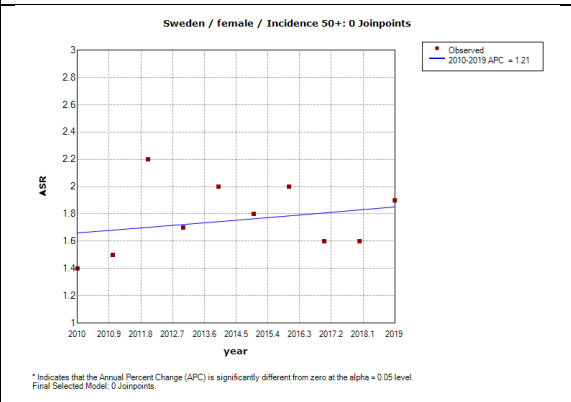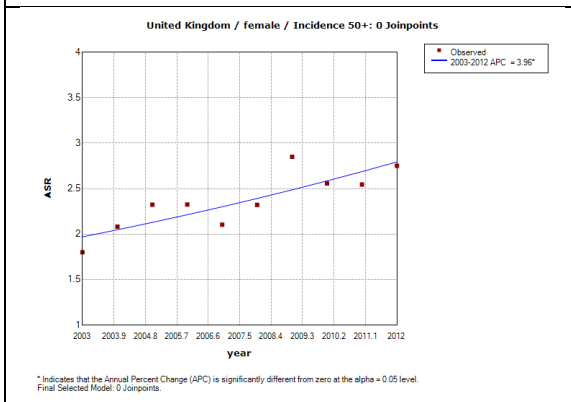

**Western Europe**

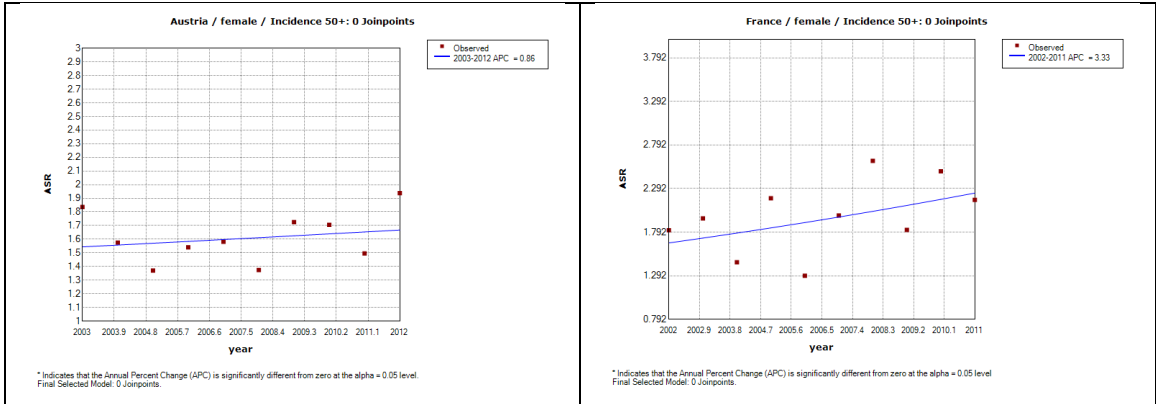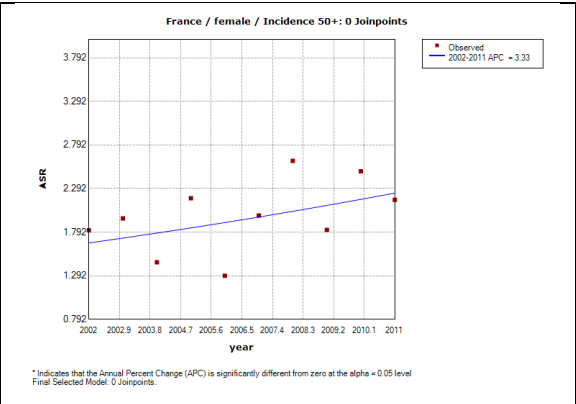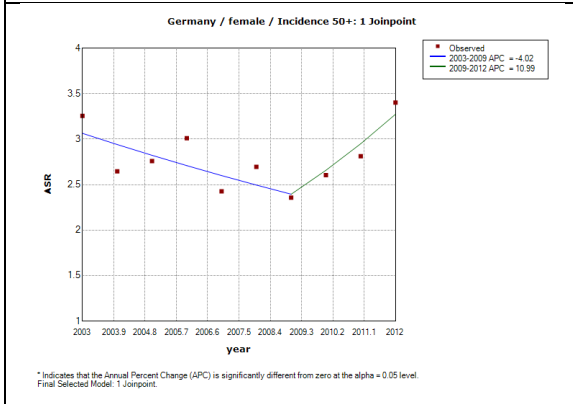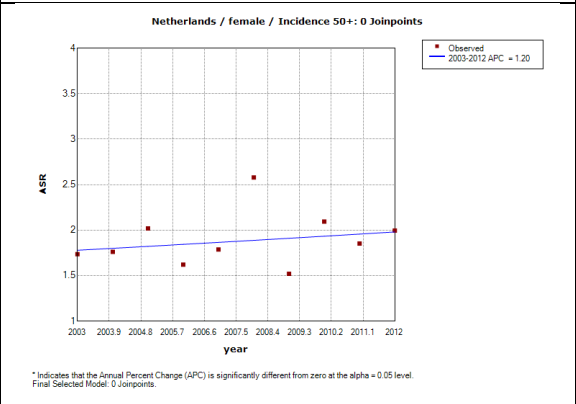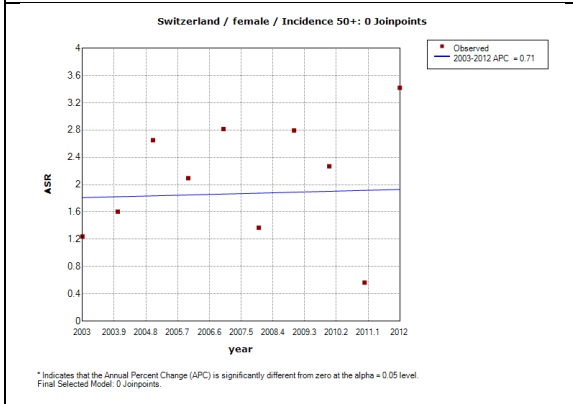

## Southern Europe

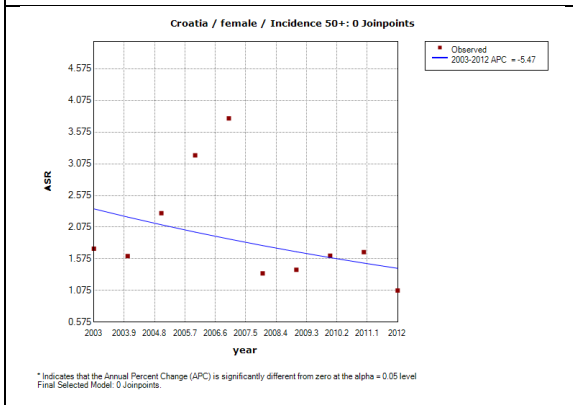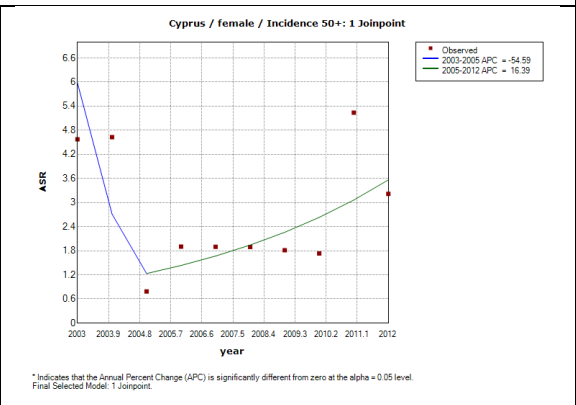

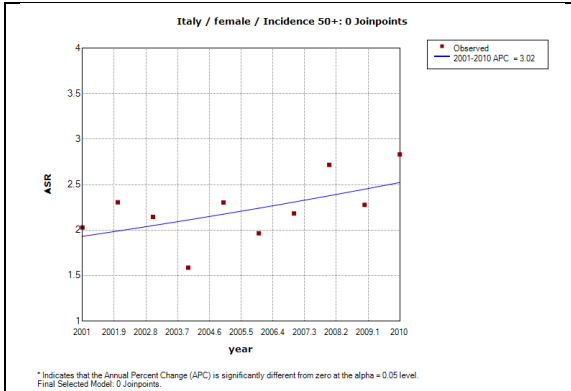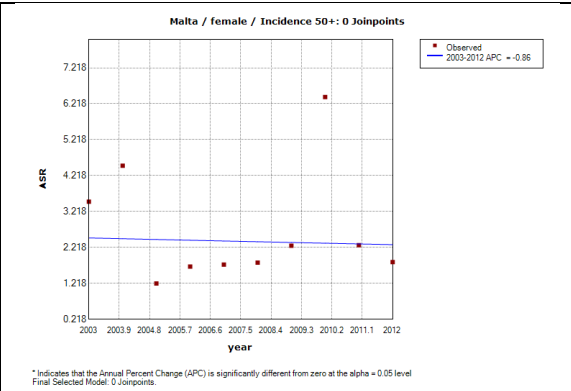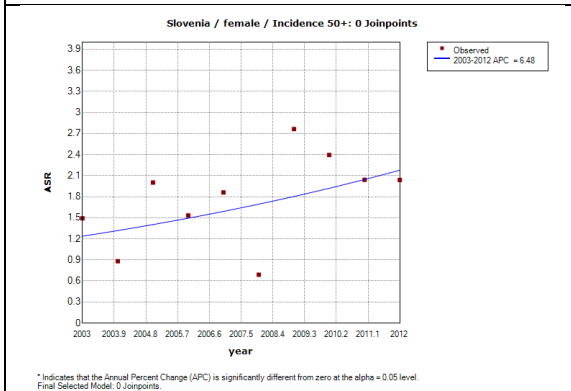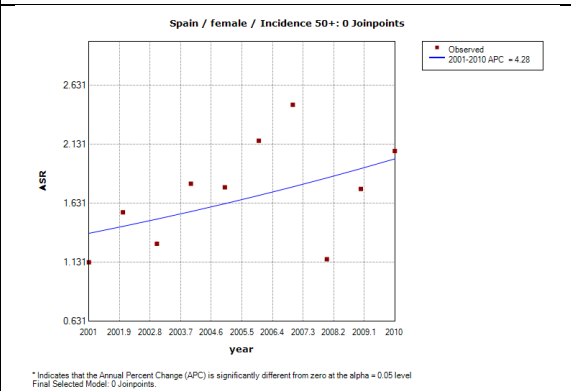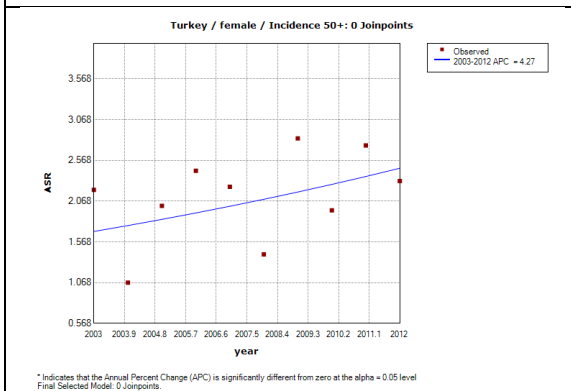

## Eastern Europe

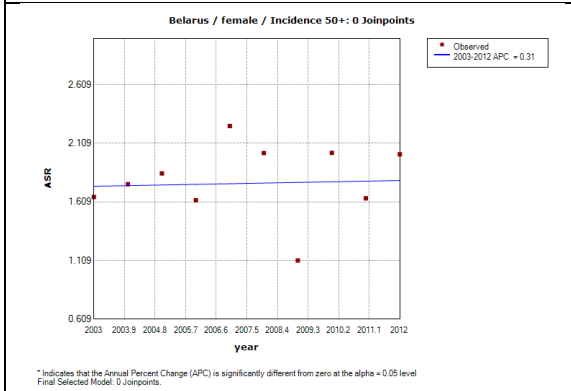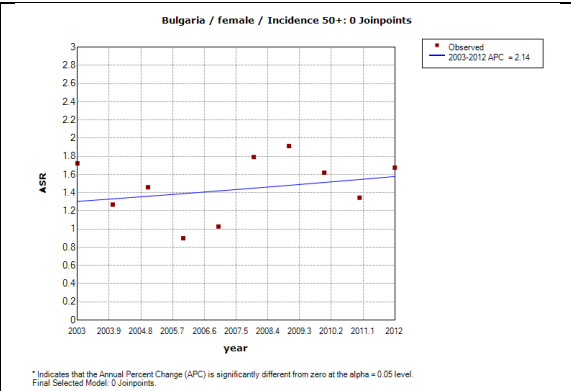

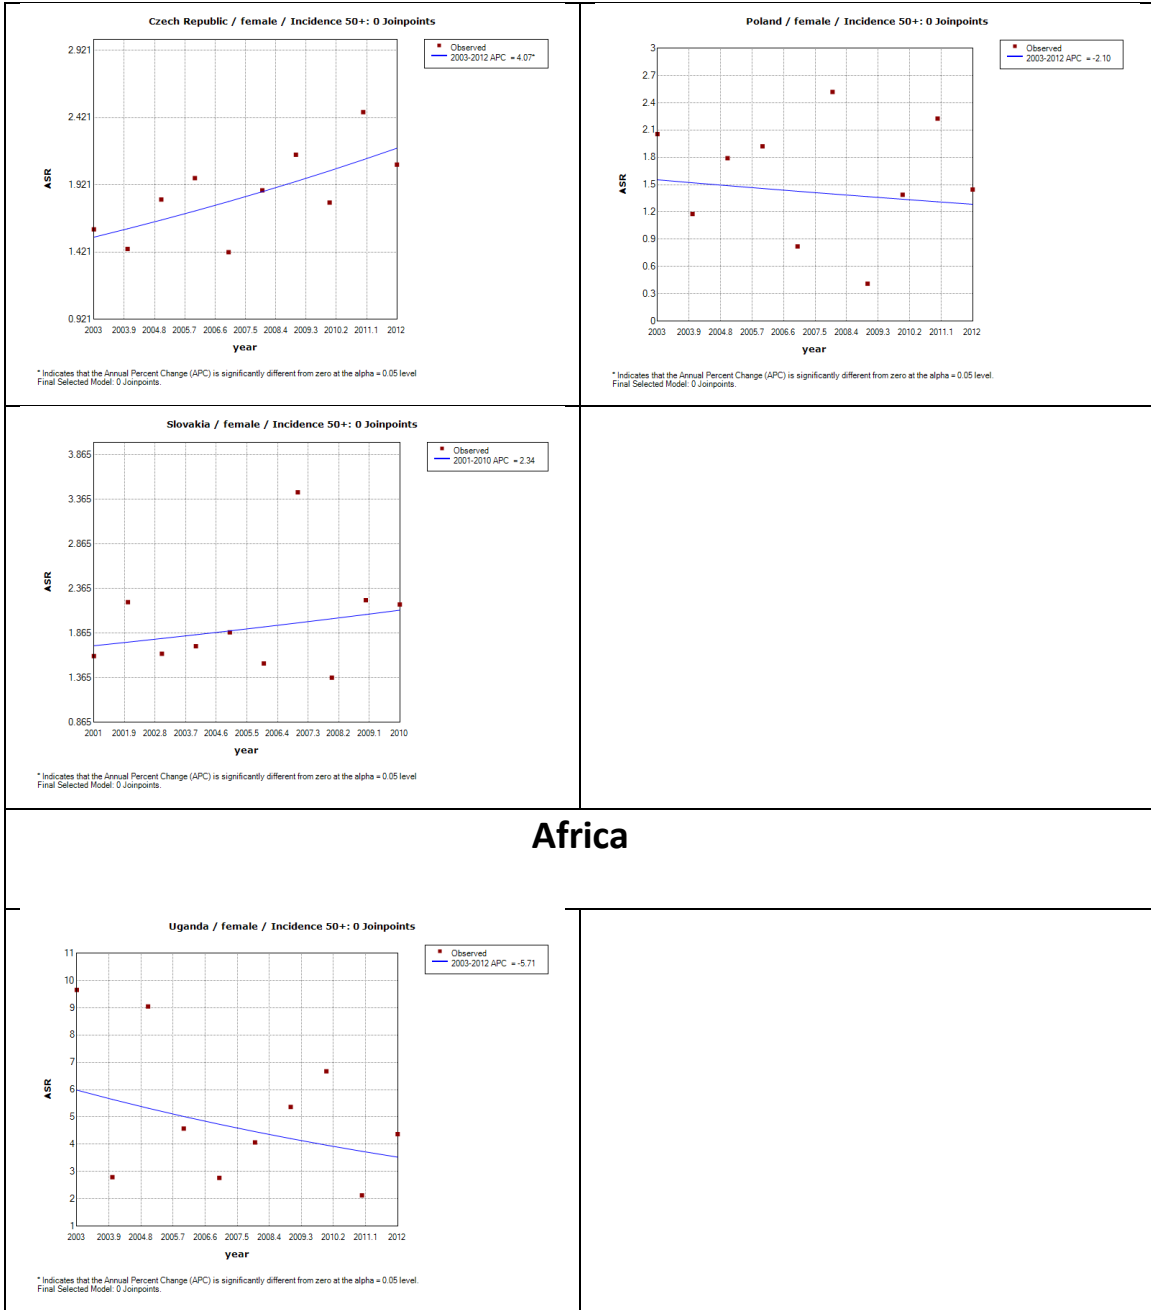

i.) Mortality male all ages

## Asia

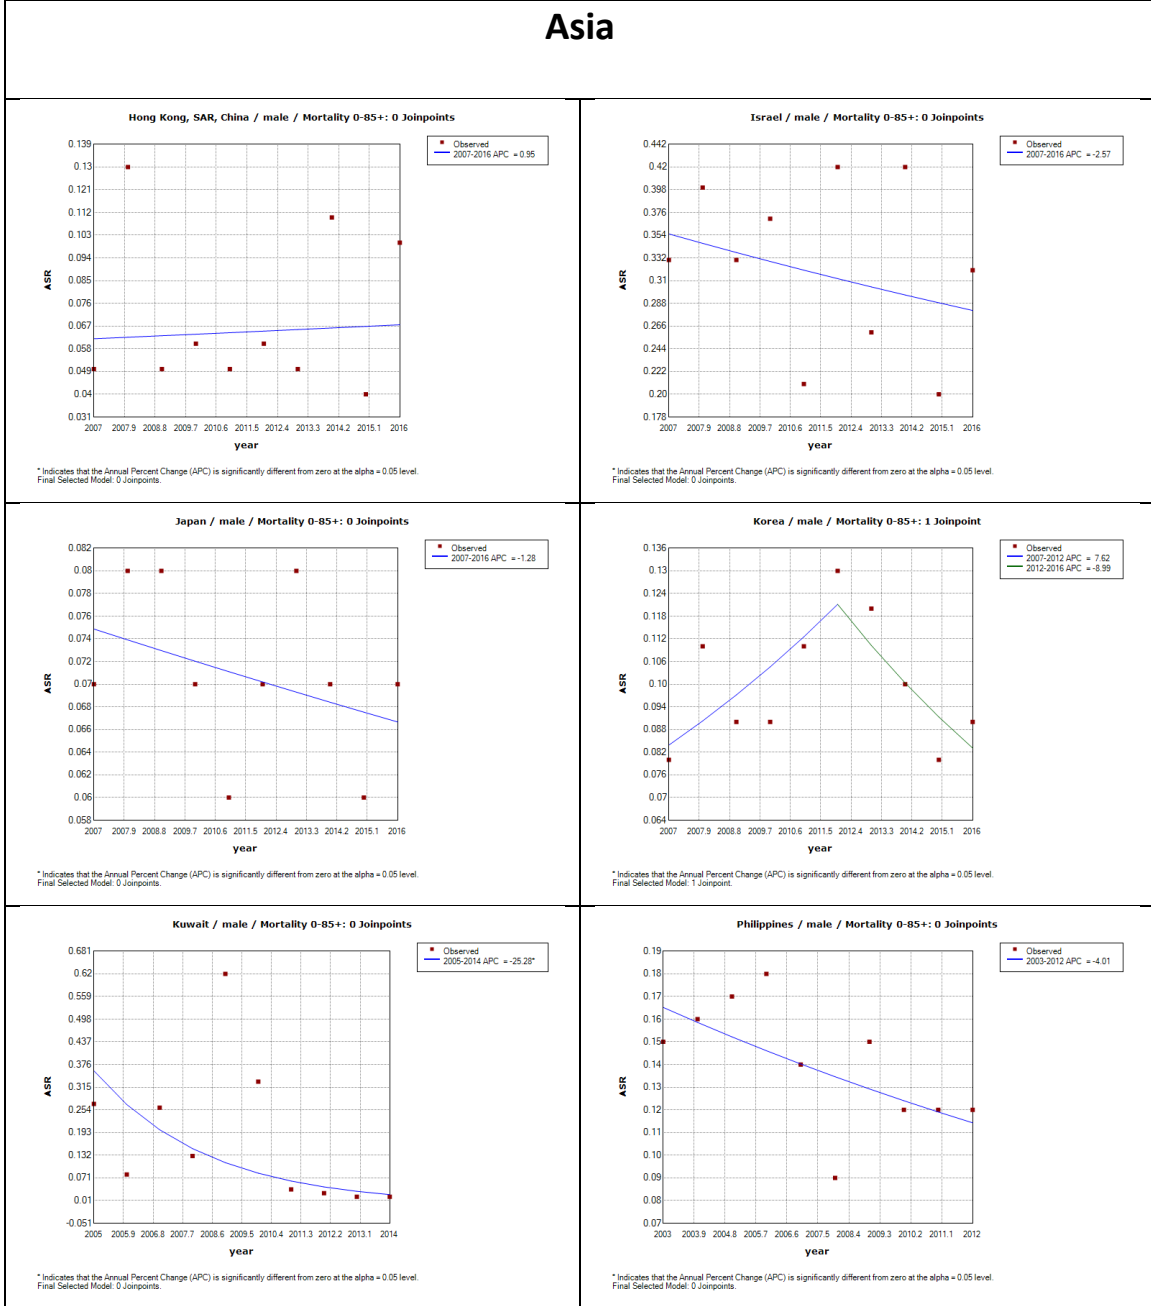

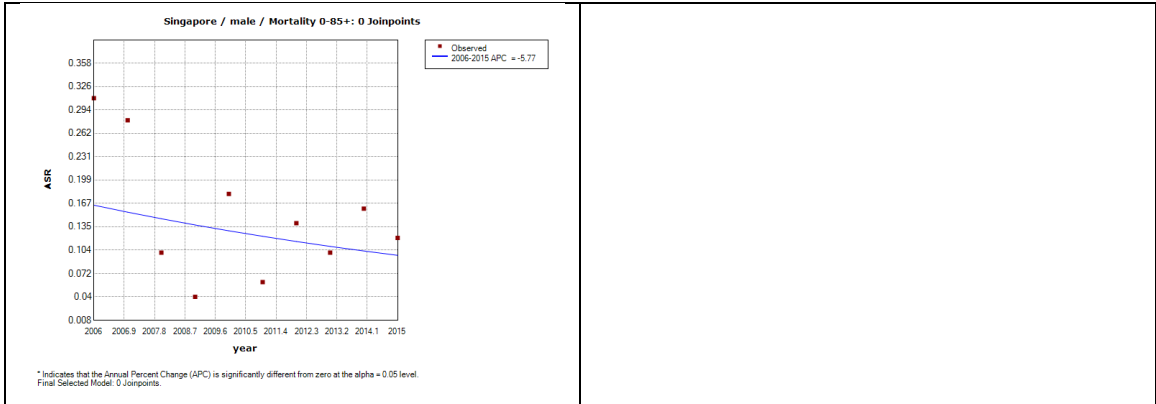

## Oceania

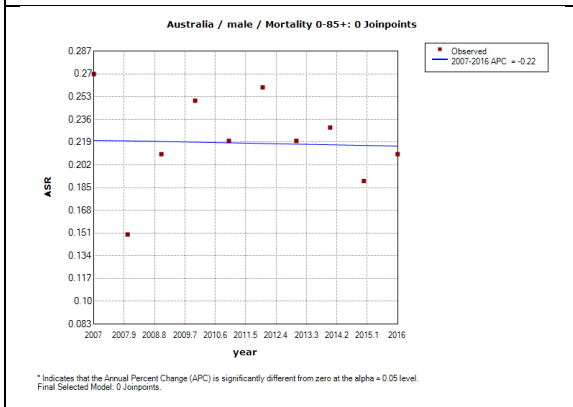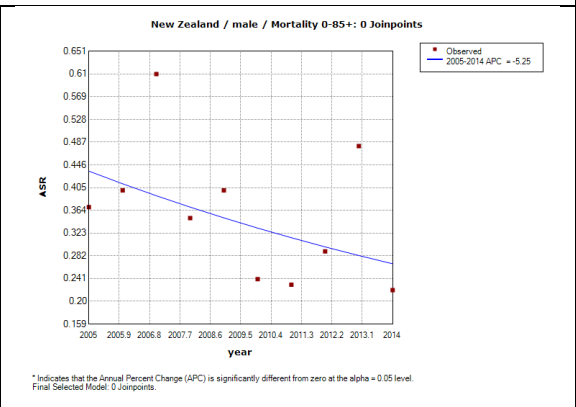

# North America

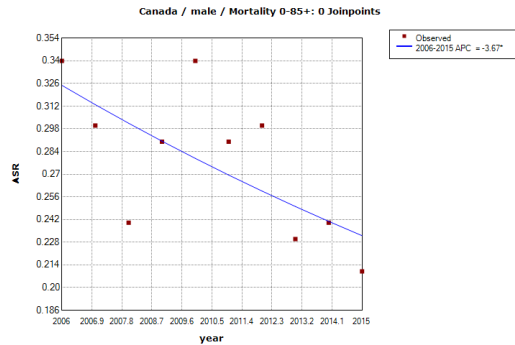

\* Indicates that the Annual Percent Change (APC) is significantly different from zero at the alpha = 0.05 level. Final Selected Model: 0 Joinspoints.

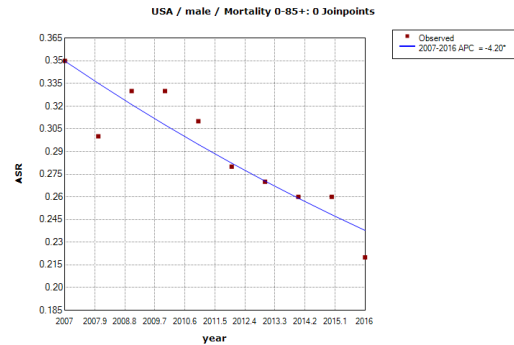

\* Indicates that the Annual Percent Change (APC) is significantly different from zero at the alpha = 0.05 level. Final Selected Model: 0 Joinspoints.

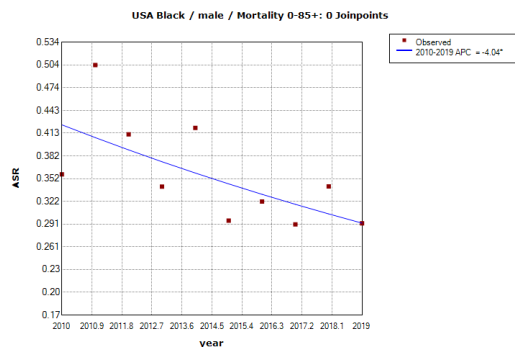

\* Indicates that the Annual Percent Change (APC) is significantly different from zero at the alpha = 0.05 level. Final Selected Model: 0 Joinspoints.

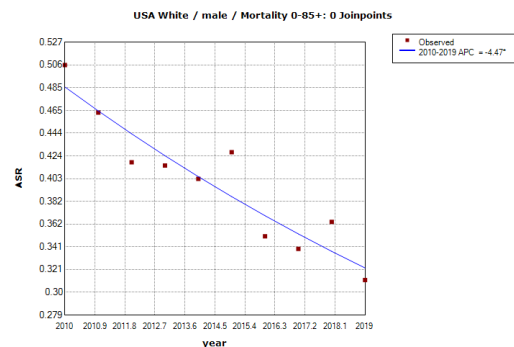

\* Indicates that the Annual Percent Change (APC) is significantly different from zero at the alpha = 0.05 level. Final Selected Model: 0 Joinspoints.

# South America

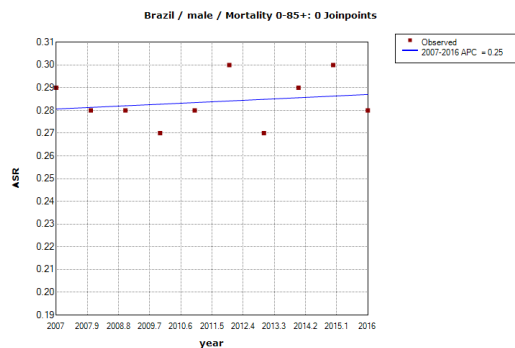

\* Indicates that the Annual Percent Change (APC) is significantly different from zero at the alpha = 0.05 level. Final Selected Model: 0 Joinspoints.

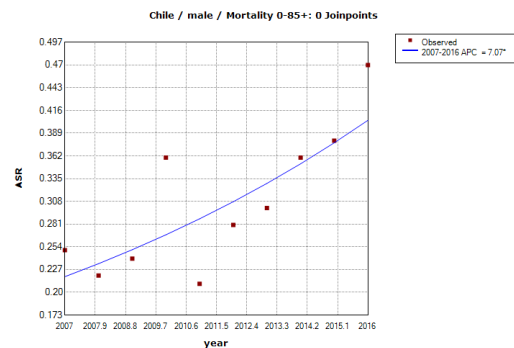

\* Indicates that the Annual Percent Change (APC) is significantly different from zero at the alpha = 0.05 level. Final Selected Model: 0 Joinspoints.



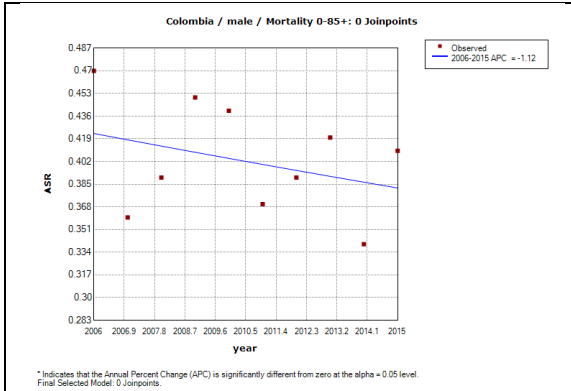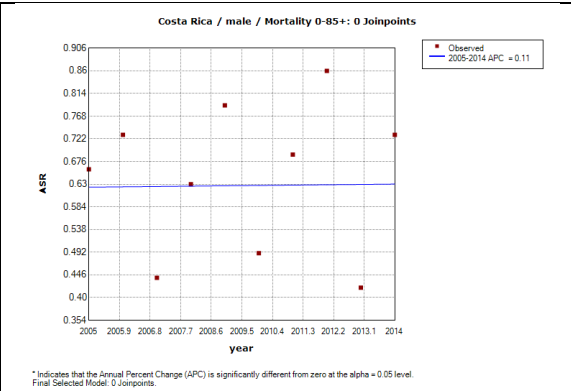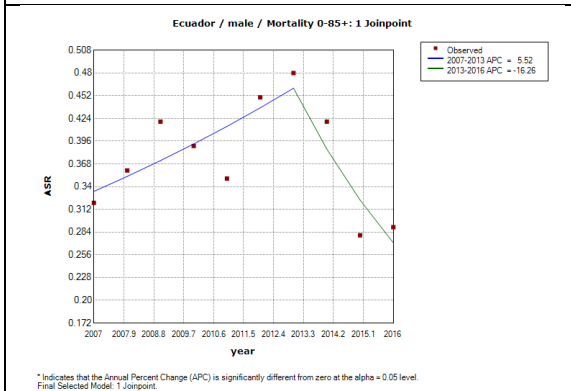

## Northern Europe

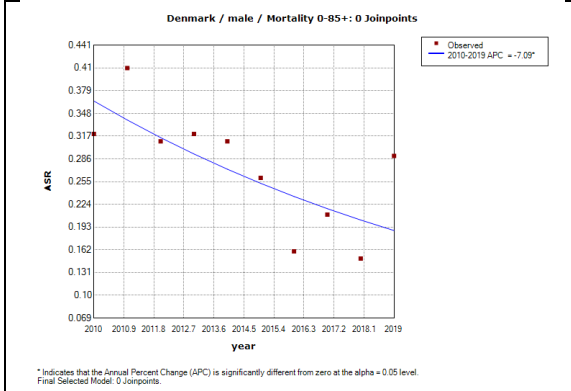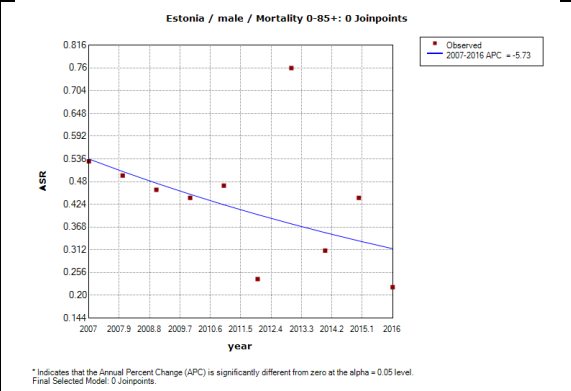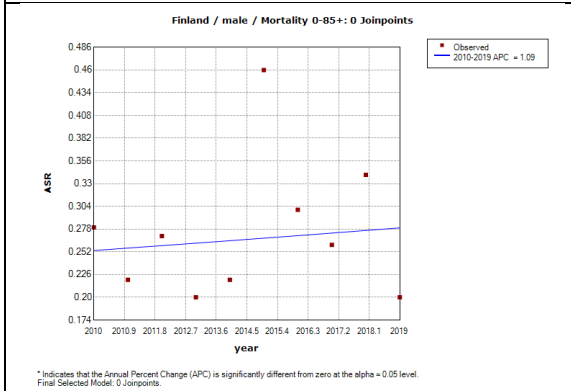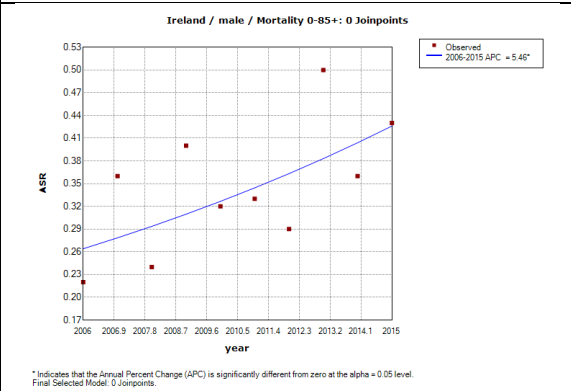

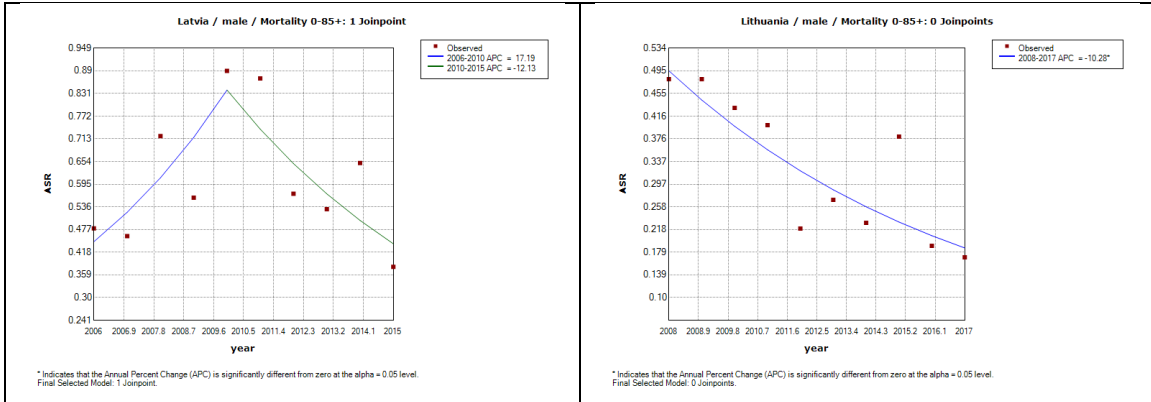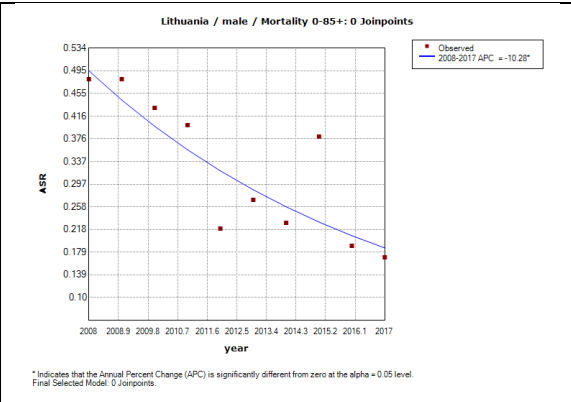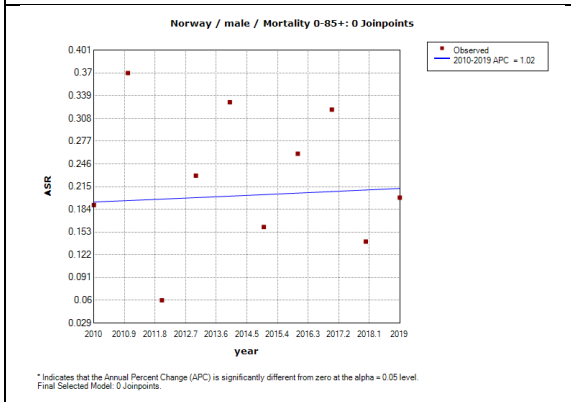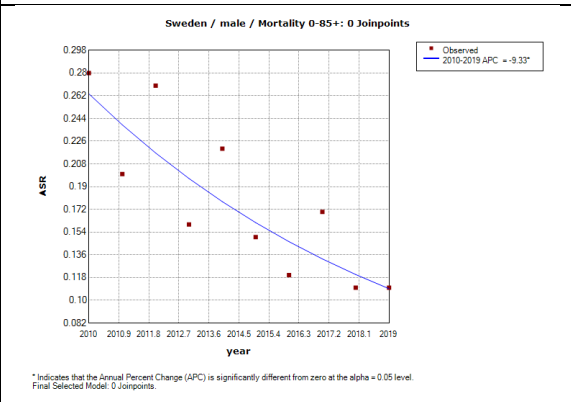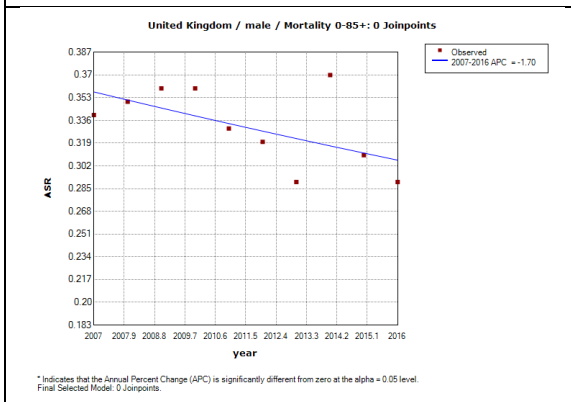

**Western Europe**

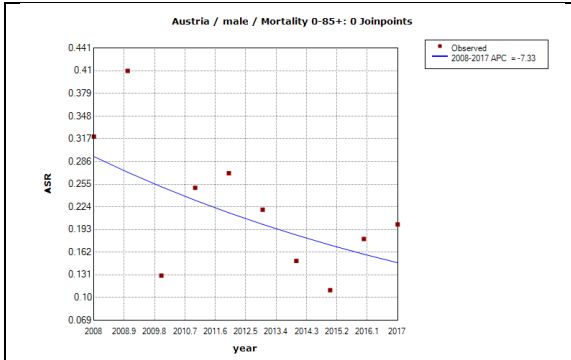

\* Indicates that the Annual Percent Change (APC) is significantly different from zero at the alpha = 0.05 level.  
Final Selected Model: 0 Joinpoints.

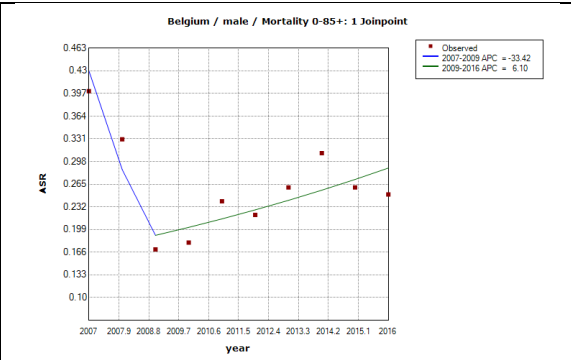

\* Indicates that the Annual Percent Change (APC) is significantly different from zero at the alpha = 0.05 level.  
Final Selected Model: 1 Joinpoint.

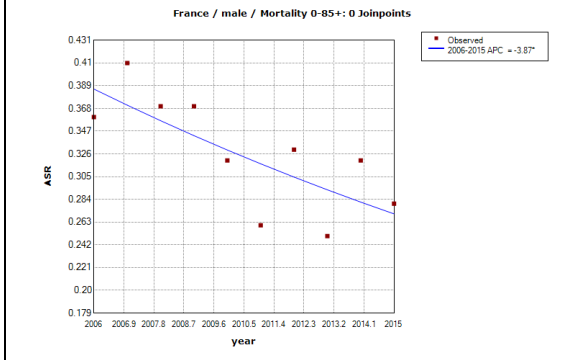

\* Indicates that the Annual Percent Change (APC) is significantly different from zero at the alpha = 0.05 level.  
Final Selected Model: 0 Joinpoints.

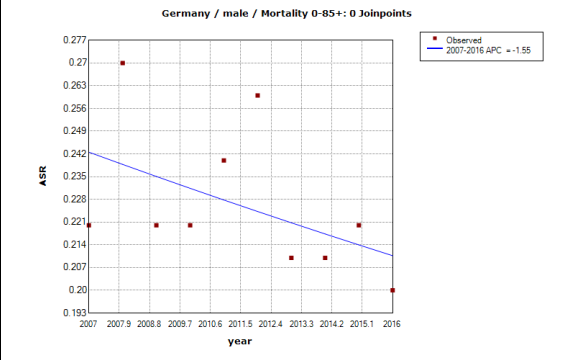

\* Indicates that the Annual Percent Change (APC) is significantly different from zero at the alpha = 0.05 level.  
Final Selected Model: 0 Joinpoints.

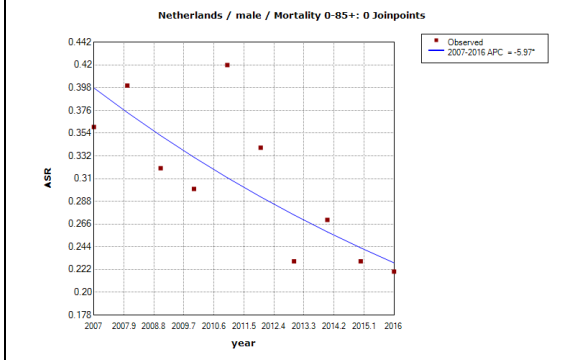

\* Indicates that the Annual Percent Change (APC) is significantly different from zero at the alpha = 0.05 level.  
Final Selected Model: 0 Joinpoints.

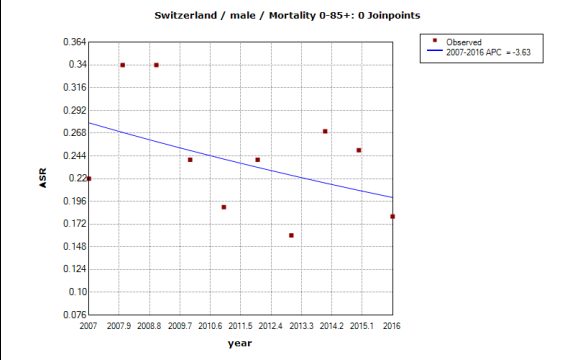

\* Indicates that the Annual Percent Change (APC) is significantly different from zero at the alpha = 0.05 level.  
Final Selected Model: 0 Joinpoints.

## Southern Europe

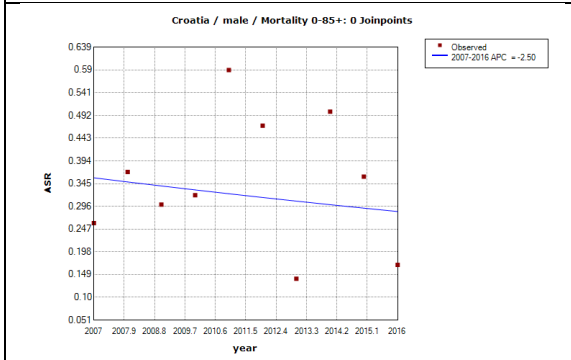

\* Indicates that the Annual Percent Change (APC) is significantly different from zero at the alpha = 0.05 level.  
Final Selected Model: 0 Joinpoints.

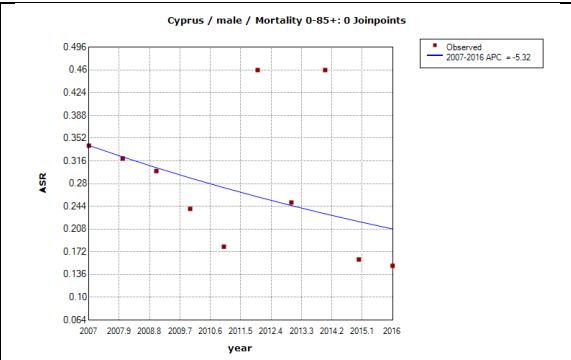

\* Indicates that the Annual Percent Change (APC) is significantly different from zero at the alpha = 0.05 level.  
Final Selected Model: 0 Joinpoints.

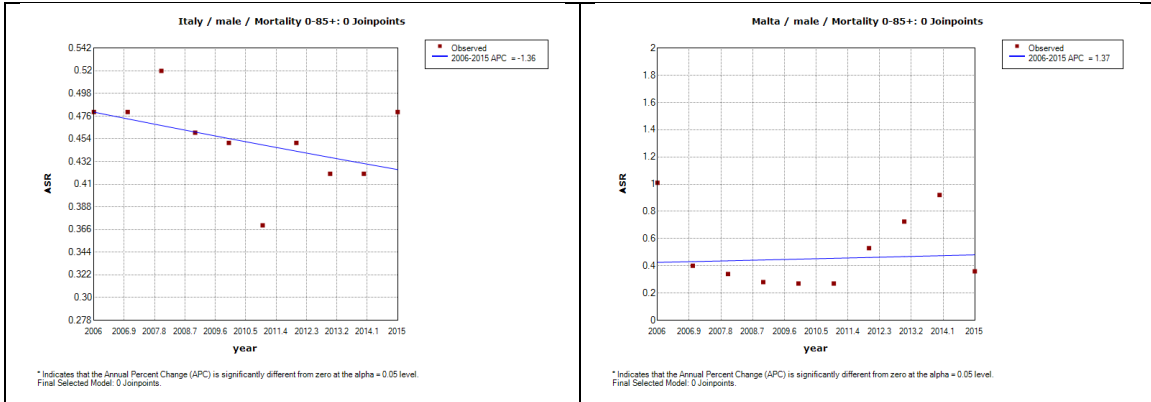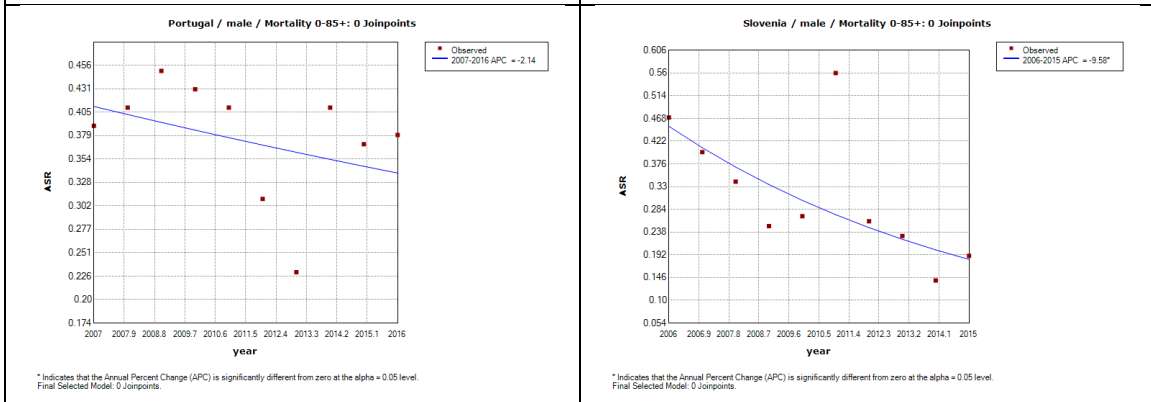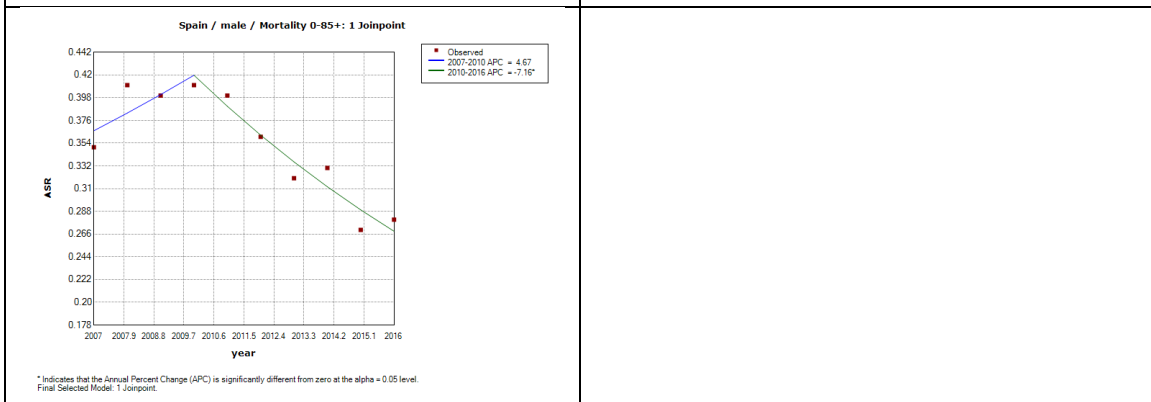

## Eastern Europe

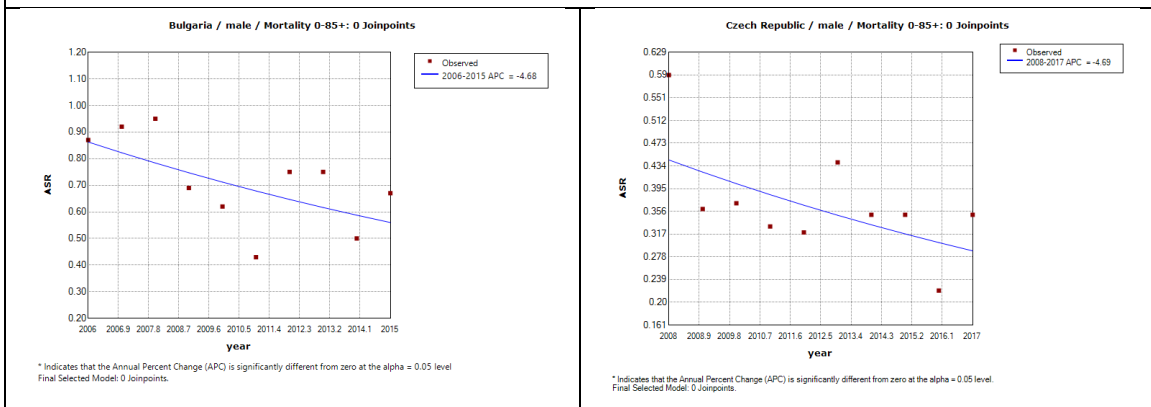

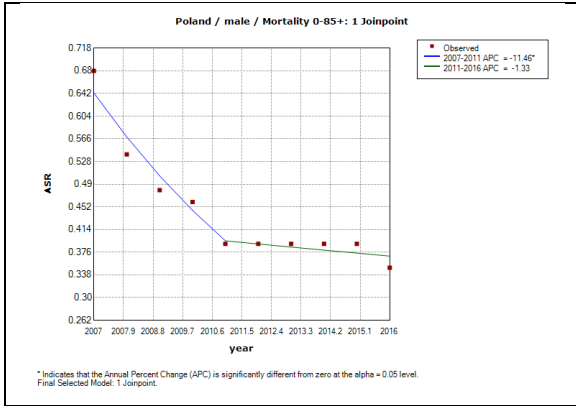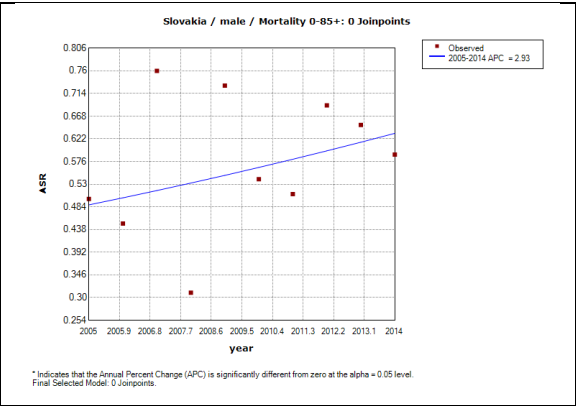

j.) Mortality female all ages

## Asia

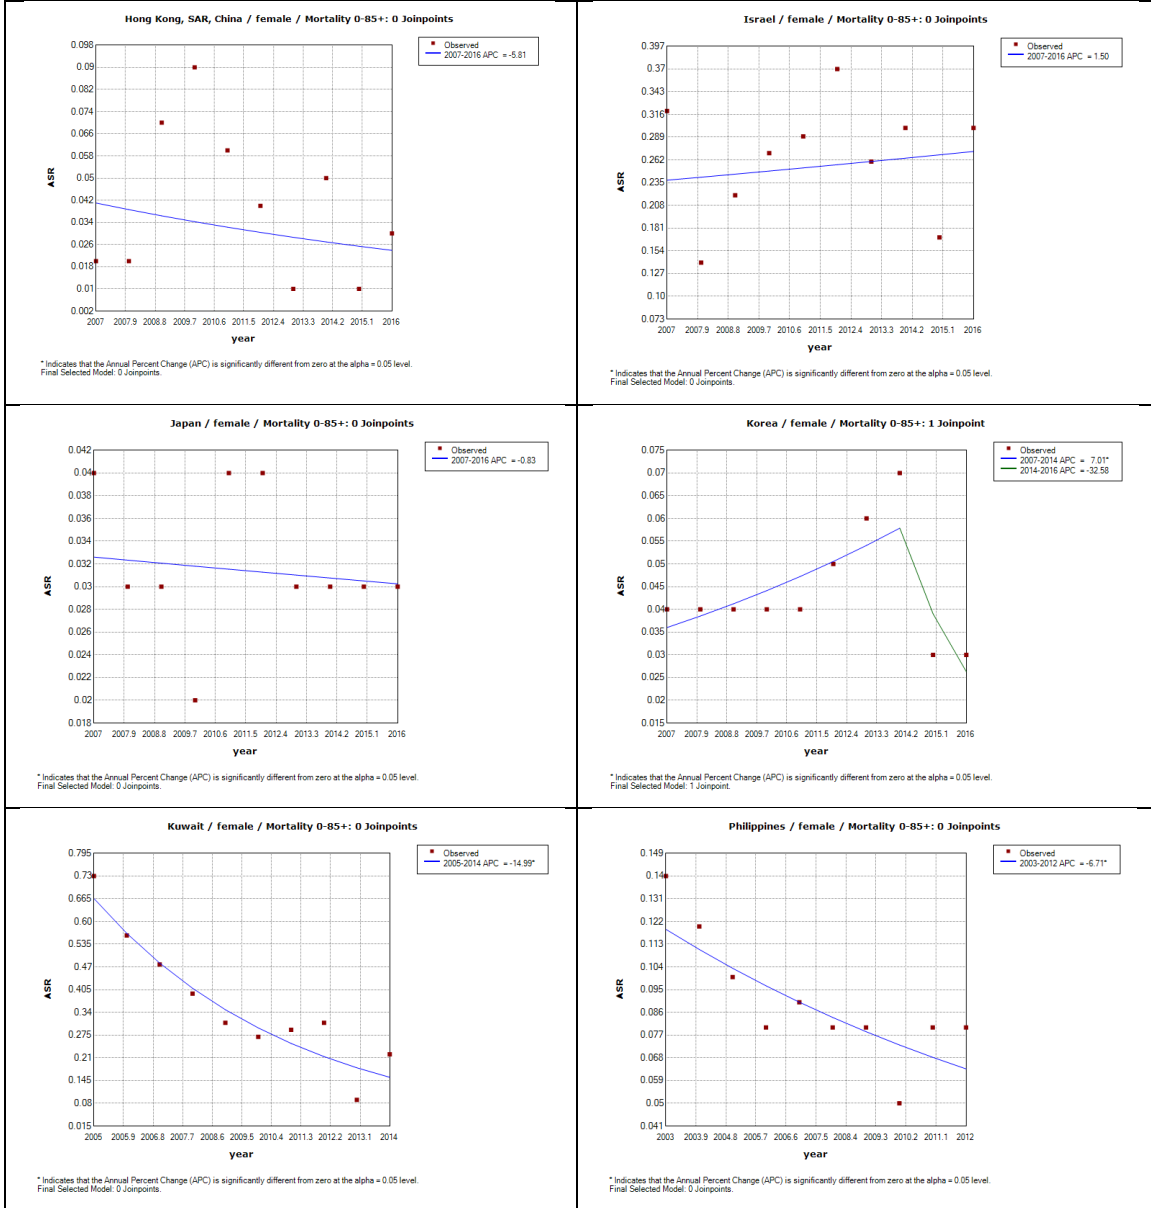

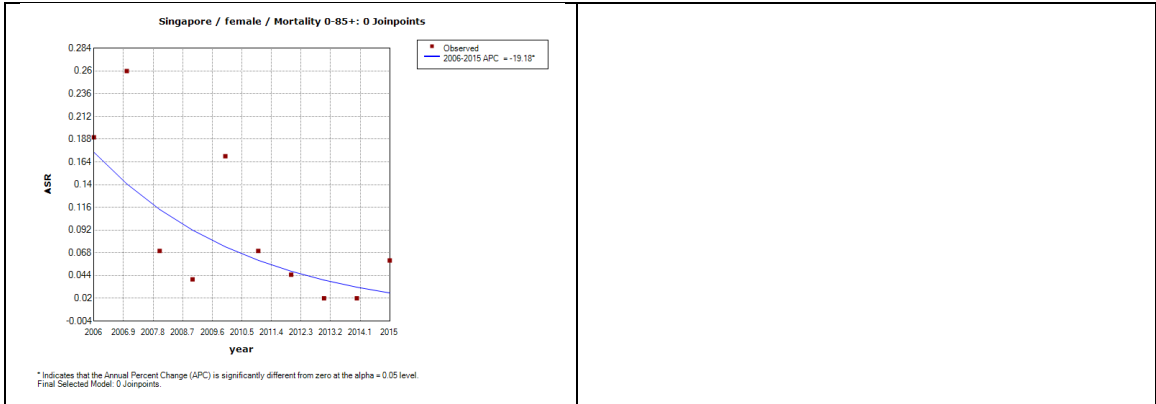

## Oceania

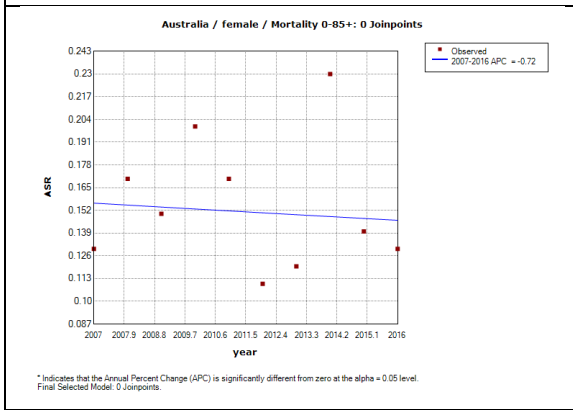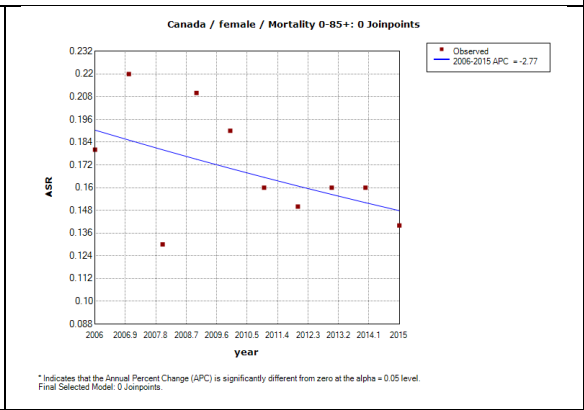

# North America

Canada / female / Mortality 0-85+: 0 Joinspoints

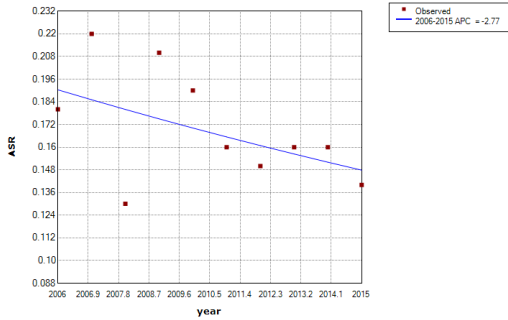

\* Indicates that the Annual Percent Change (APC) is significantly different from zero at the alpha = 0.05 level. Final Selected Model: 0 Joinspoints.

USA / female / Mortality 0-85+: 0 Joinspoints

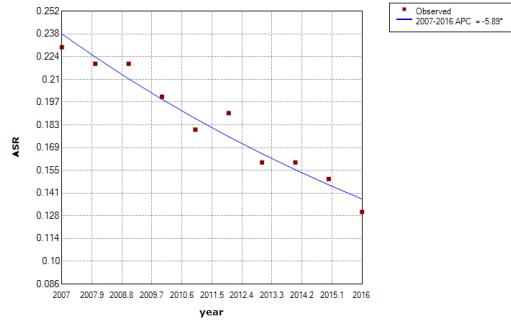

\* Indicates that the Annual Percent Change (APC) is significantly different from zero at the alpha = 0.05 level. Final Selected Model: 0 Joinspoints.

USA Black / female / Mortality 0-85+: 0 Joinspoints

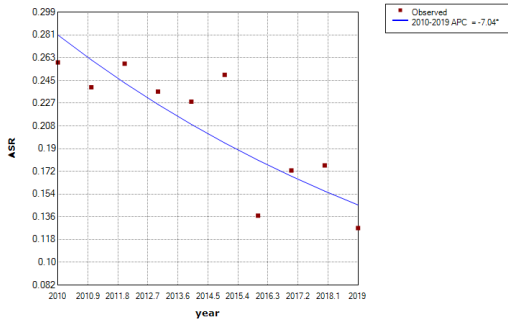

\* Indicates that the Annual Percent Change (APC) is significantly different from zero at the alpha = 0.05 level. Final Selected Model: 0 Joinspoints.

USA White / female / Mortality 0-85+: 0 Joinspoints

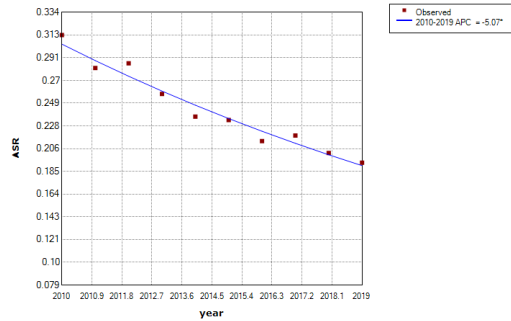

\* Indicates that the Annual Percent Change (APC) is significantly different from zero at the alpha = 0.05 level. Final Selected Model: 0 Joinspoints.

# South America

Brazil / female / Mortality 0-85+: 0 Joinspoints

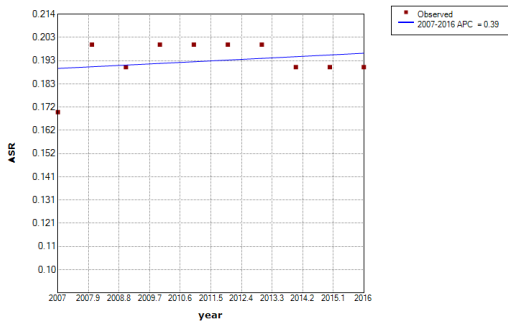

\* Indicates that the Annual Percent Change (APC) is significantly different from zero at the alpha = 0.05 level. Final Selected Model: 0 Joinspoints.

Chile / female / Mortality 0-85+: 0 Joinspoints

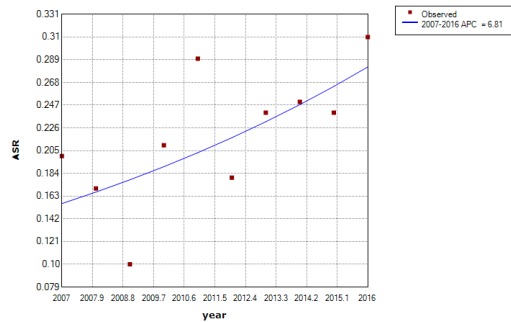

\* Indicates that the Annual Percent Change (APC) is significantly different from zero at the alpha = 0.05 level. Final Selected Model: 0 Joinspoints.



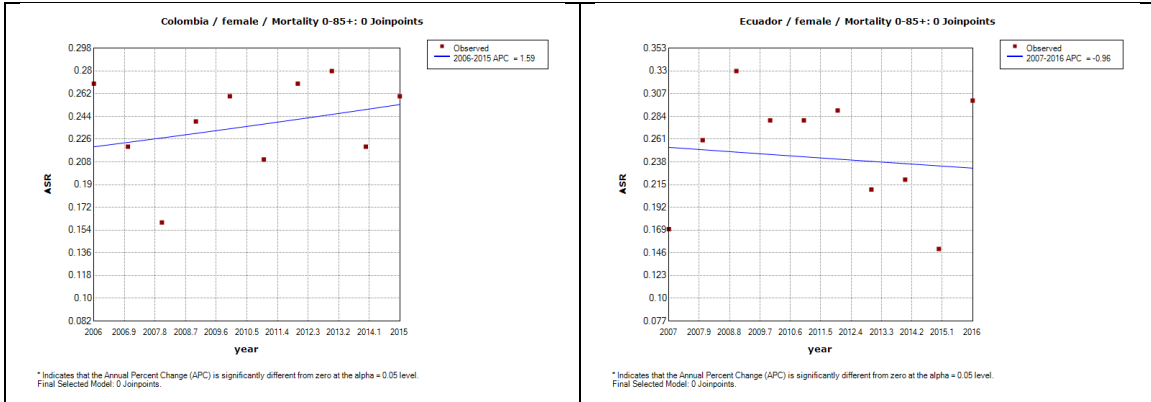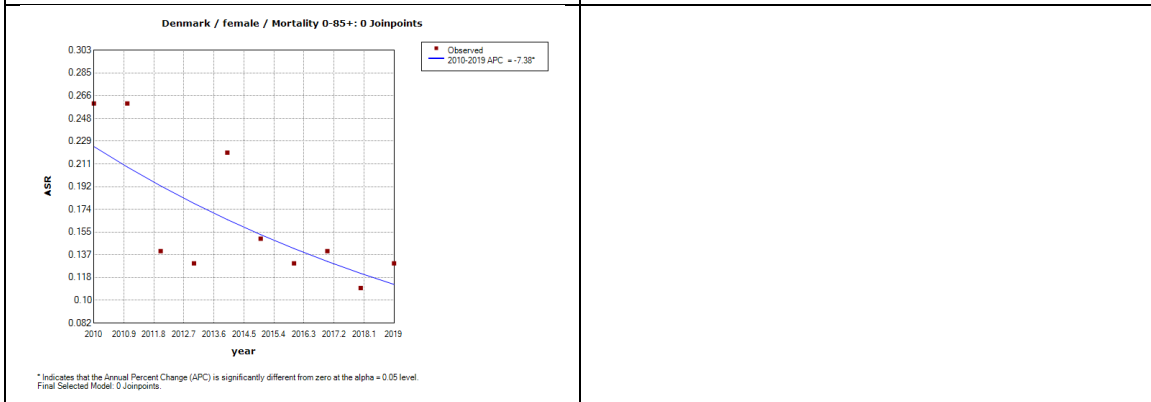

## Northern Europe

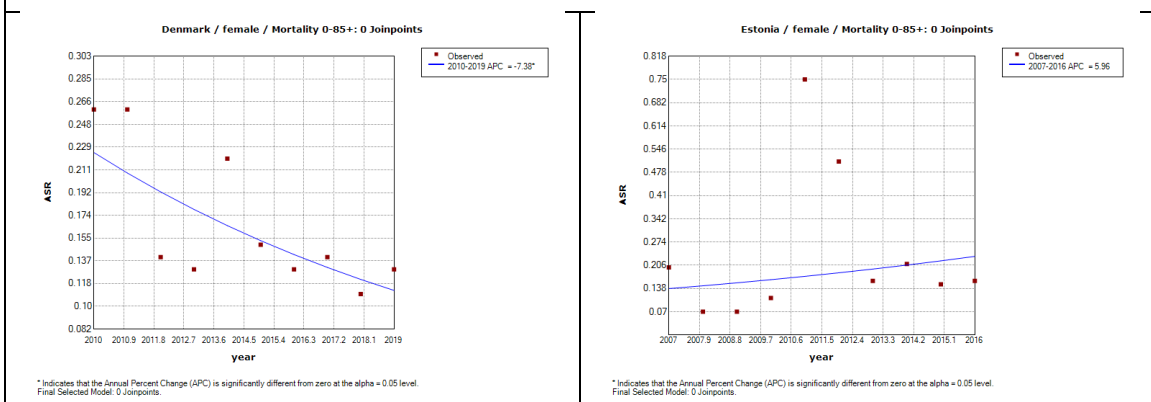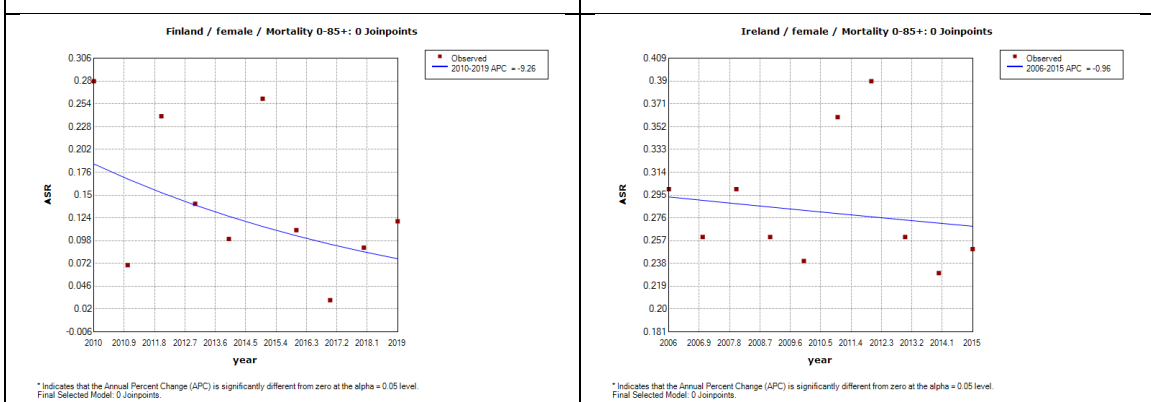

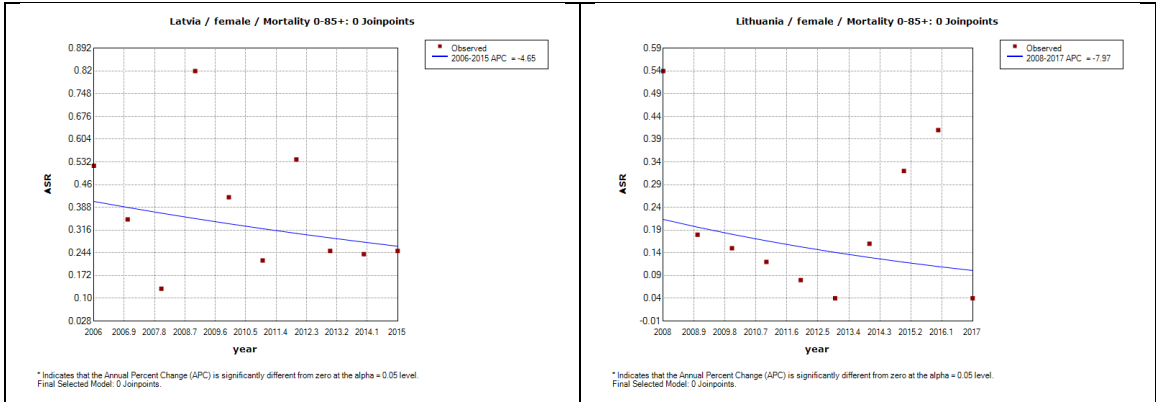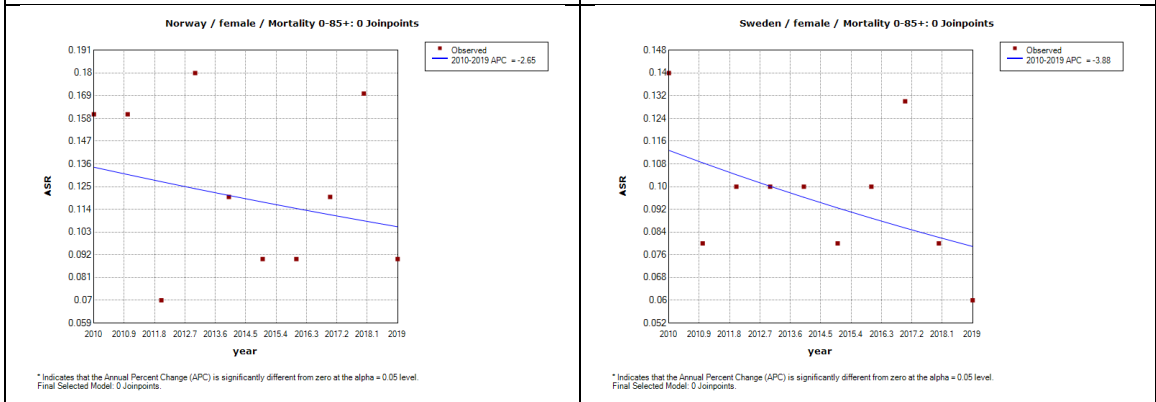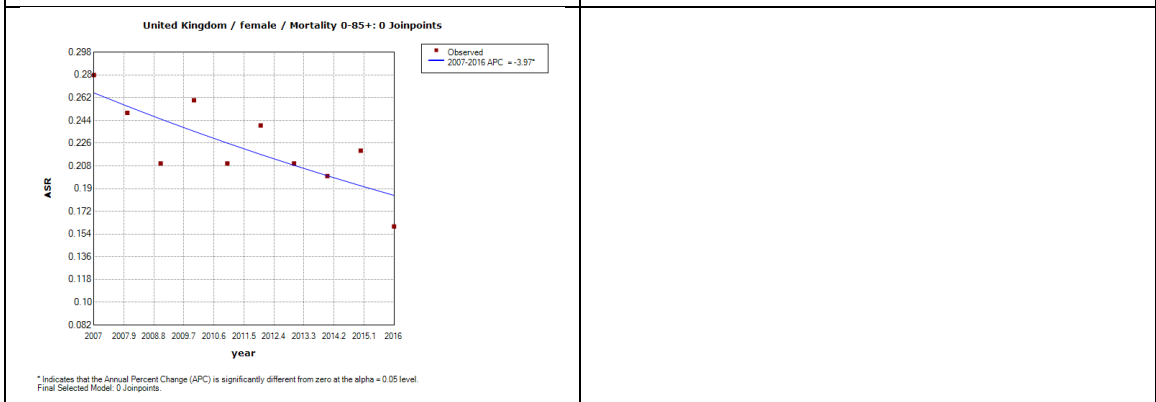

## Western Europe

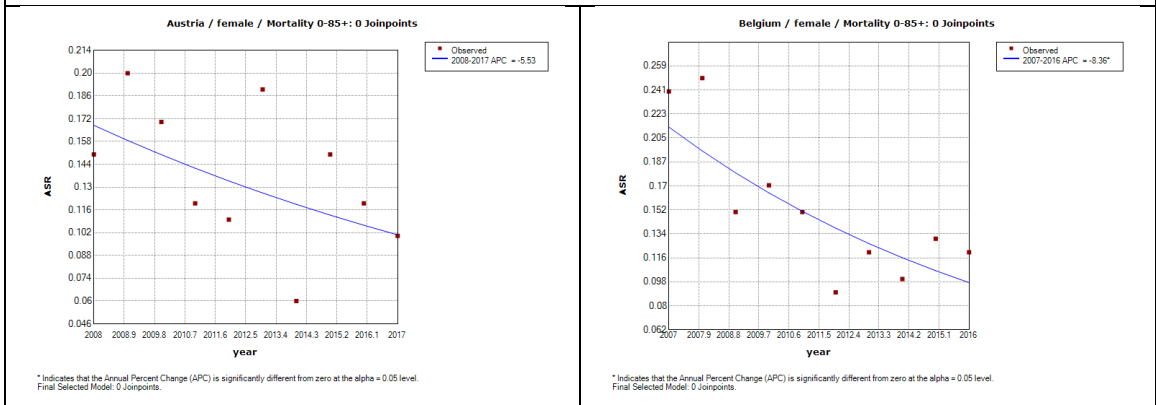

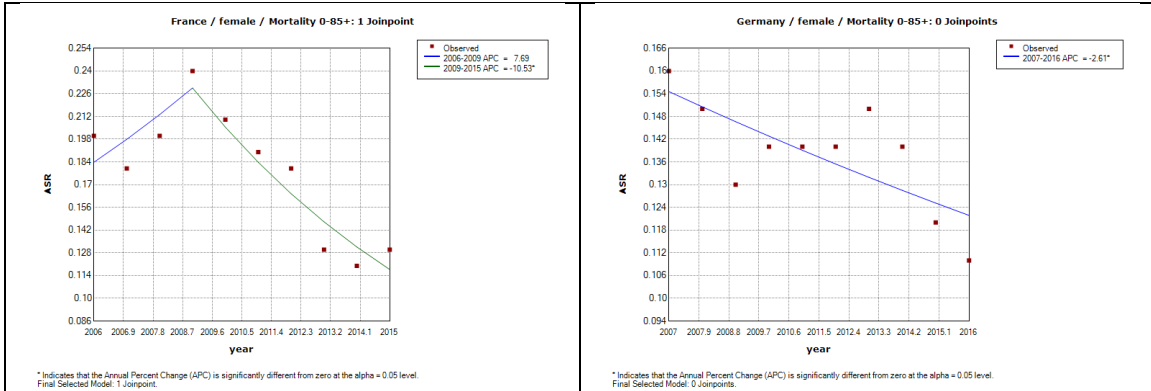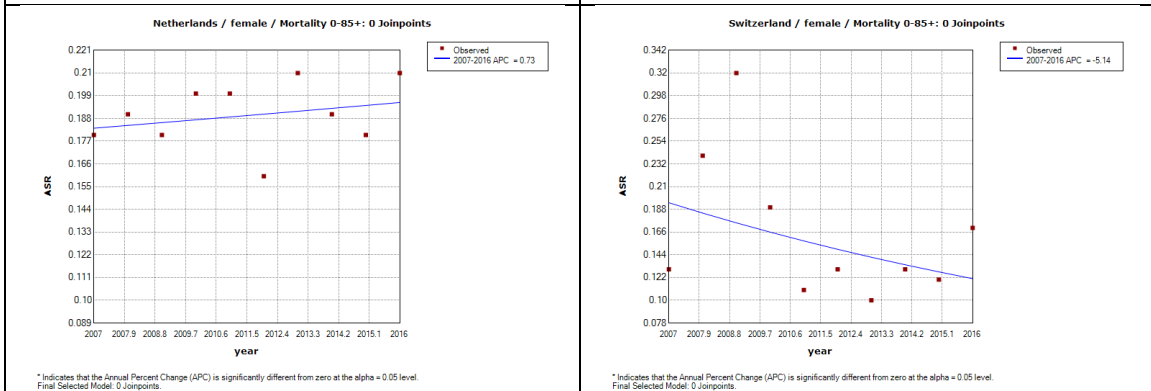

## Southern Europe

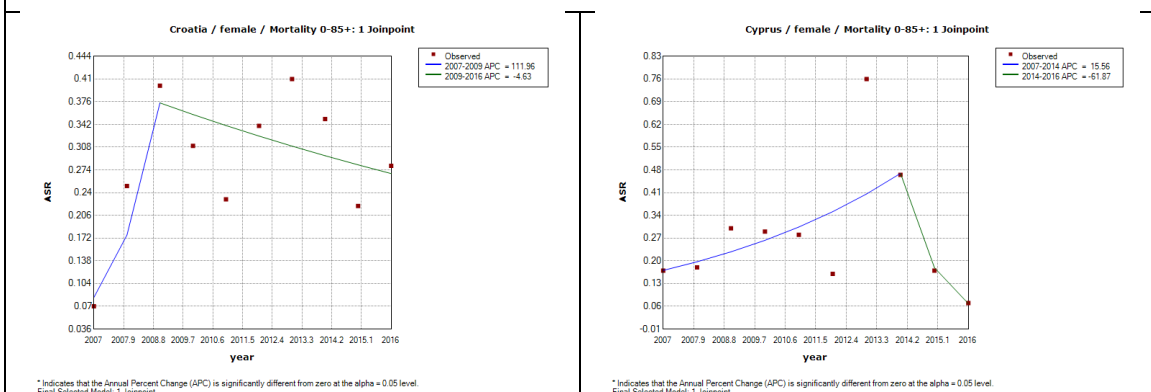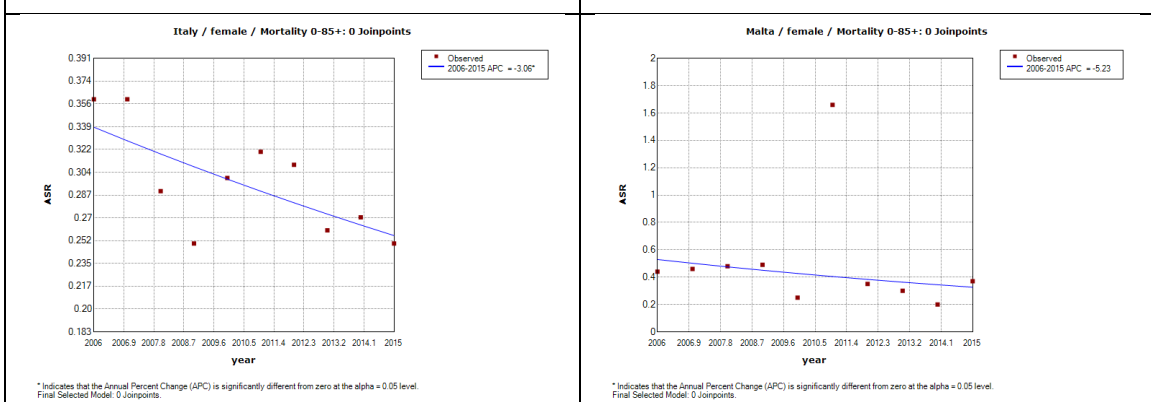

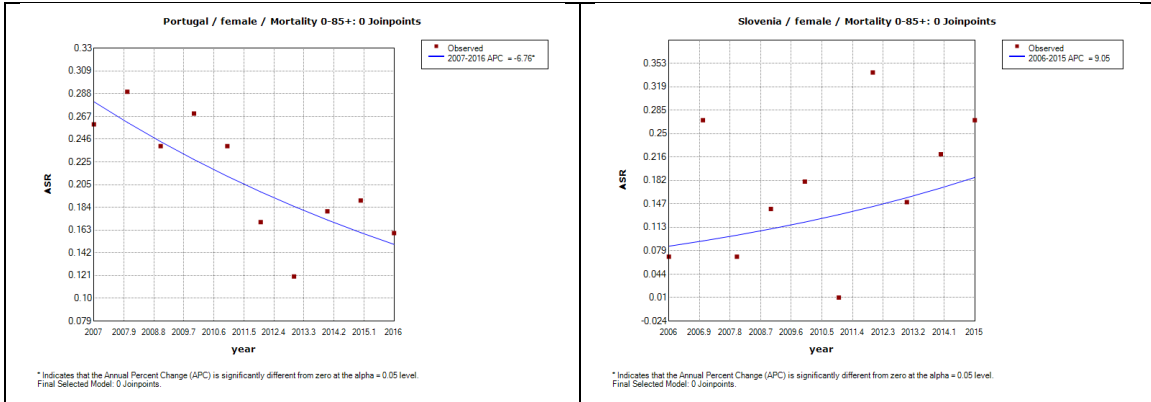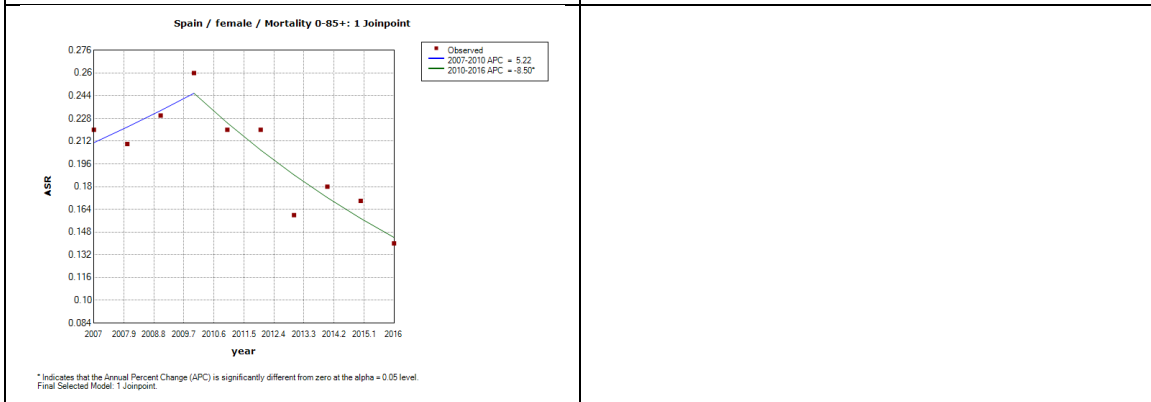

## Eastern Europe

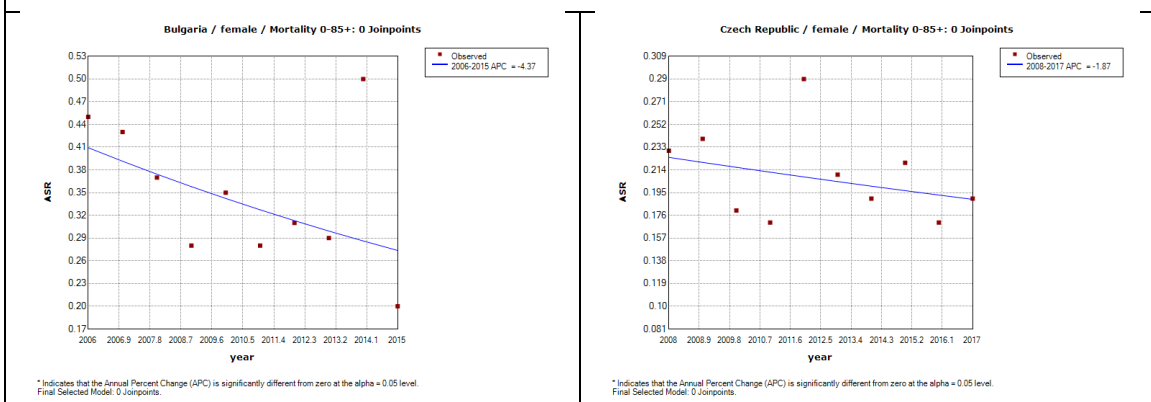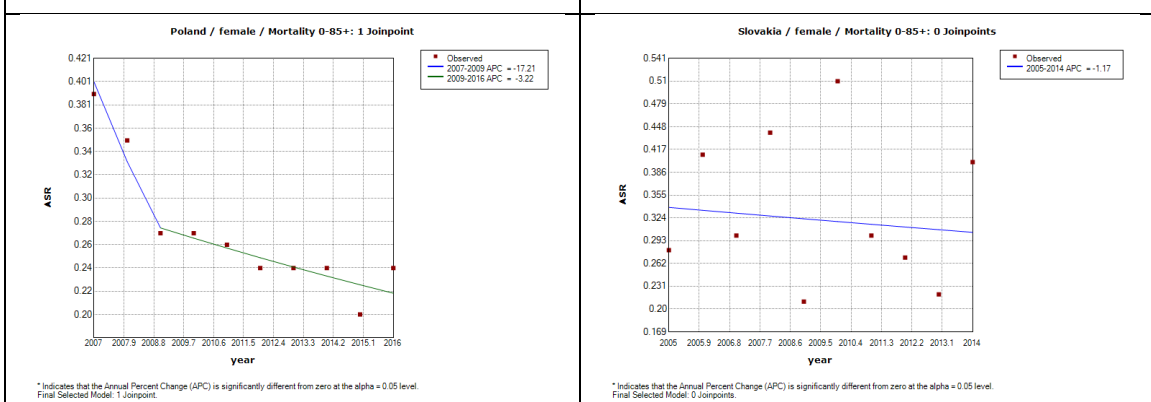

**Supplementary Figure 5. AAPC of incidence of Hodgkin lymphoma aged 50 years old or above**

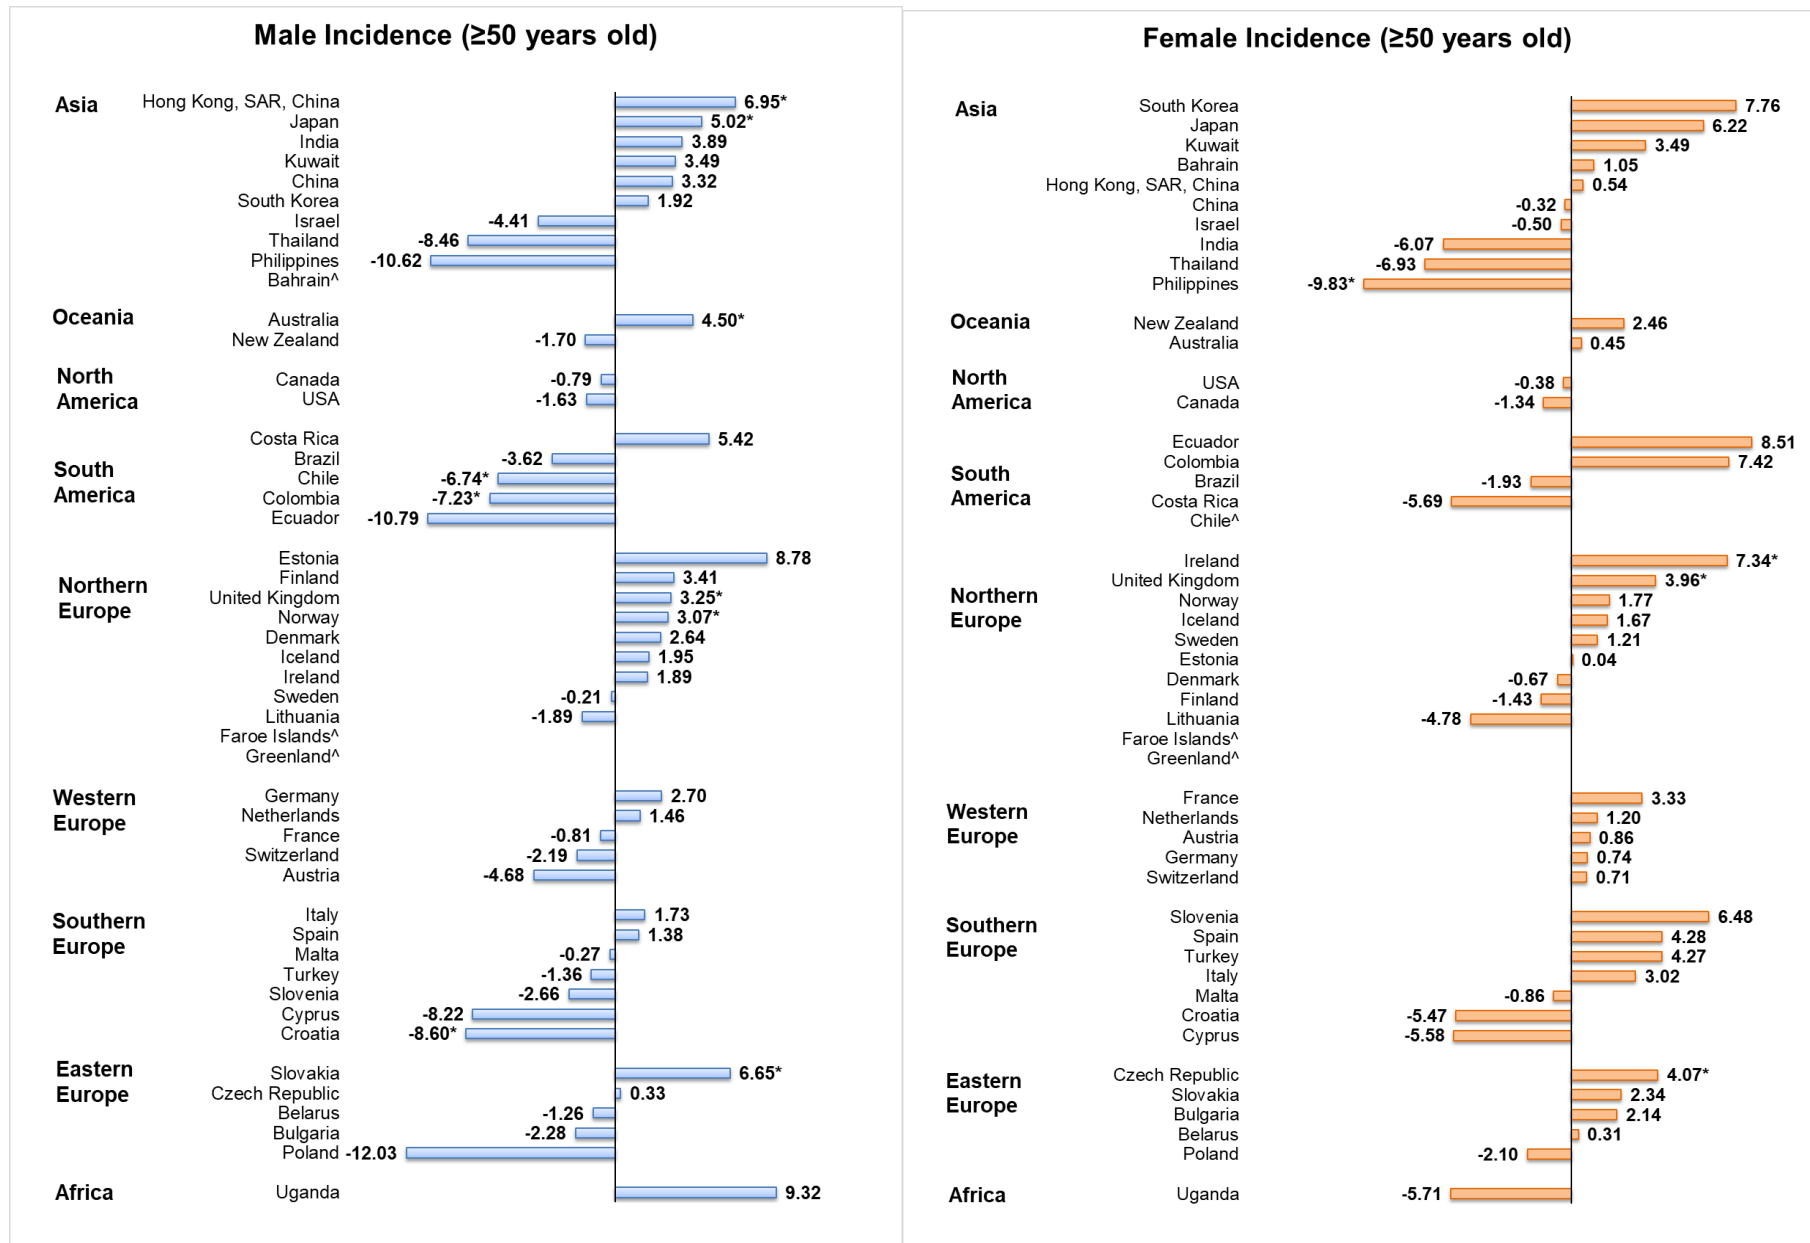

AAPC, annual percentage change; \**p* values less than 0.05.

**Supplementary Figure 6. AAPC of incidence of Hodgkin lymphoma aged < 50 years old**

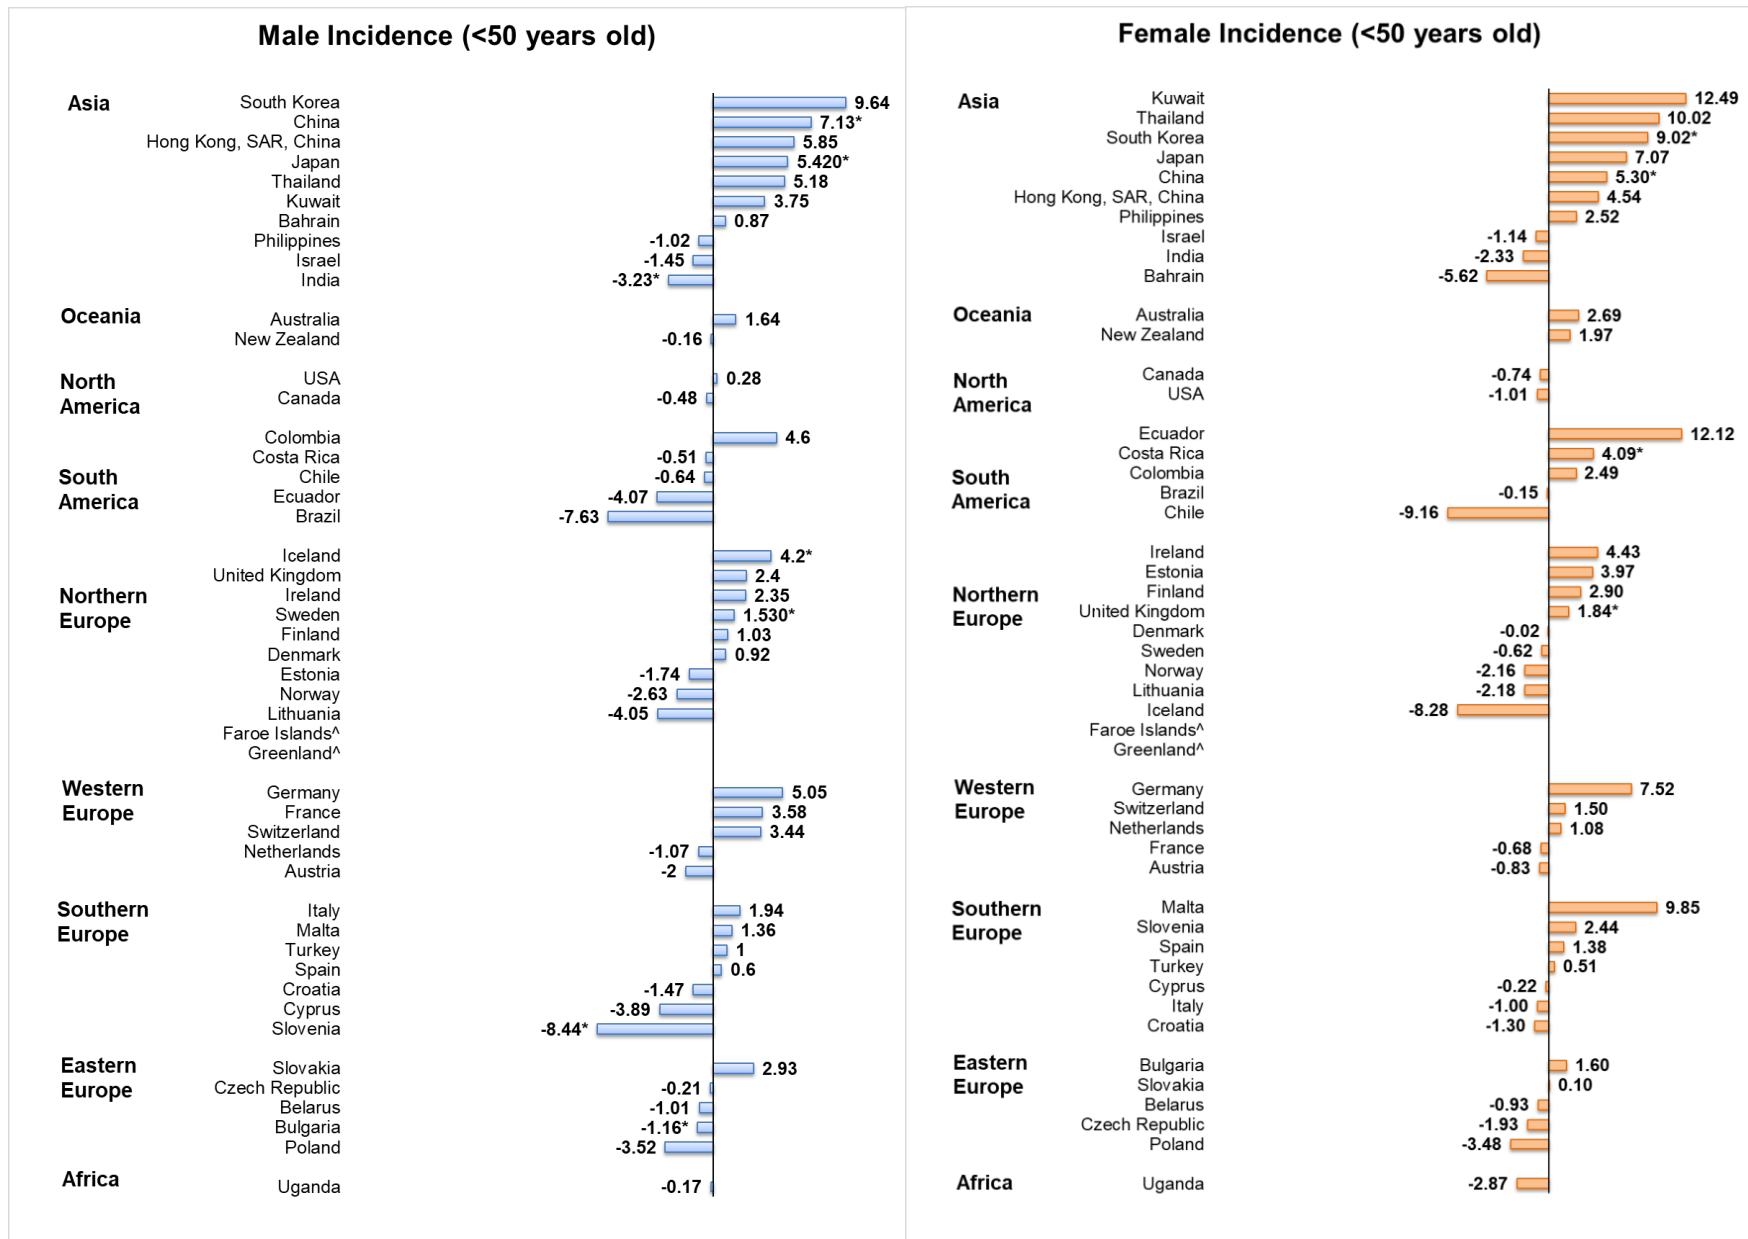

AAPC, annual percentage change; \**p* values less than 0.05.

Supplementary Figure 7. AAPC of incidence of Hodgkin lymphoma aged <40 years old

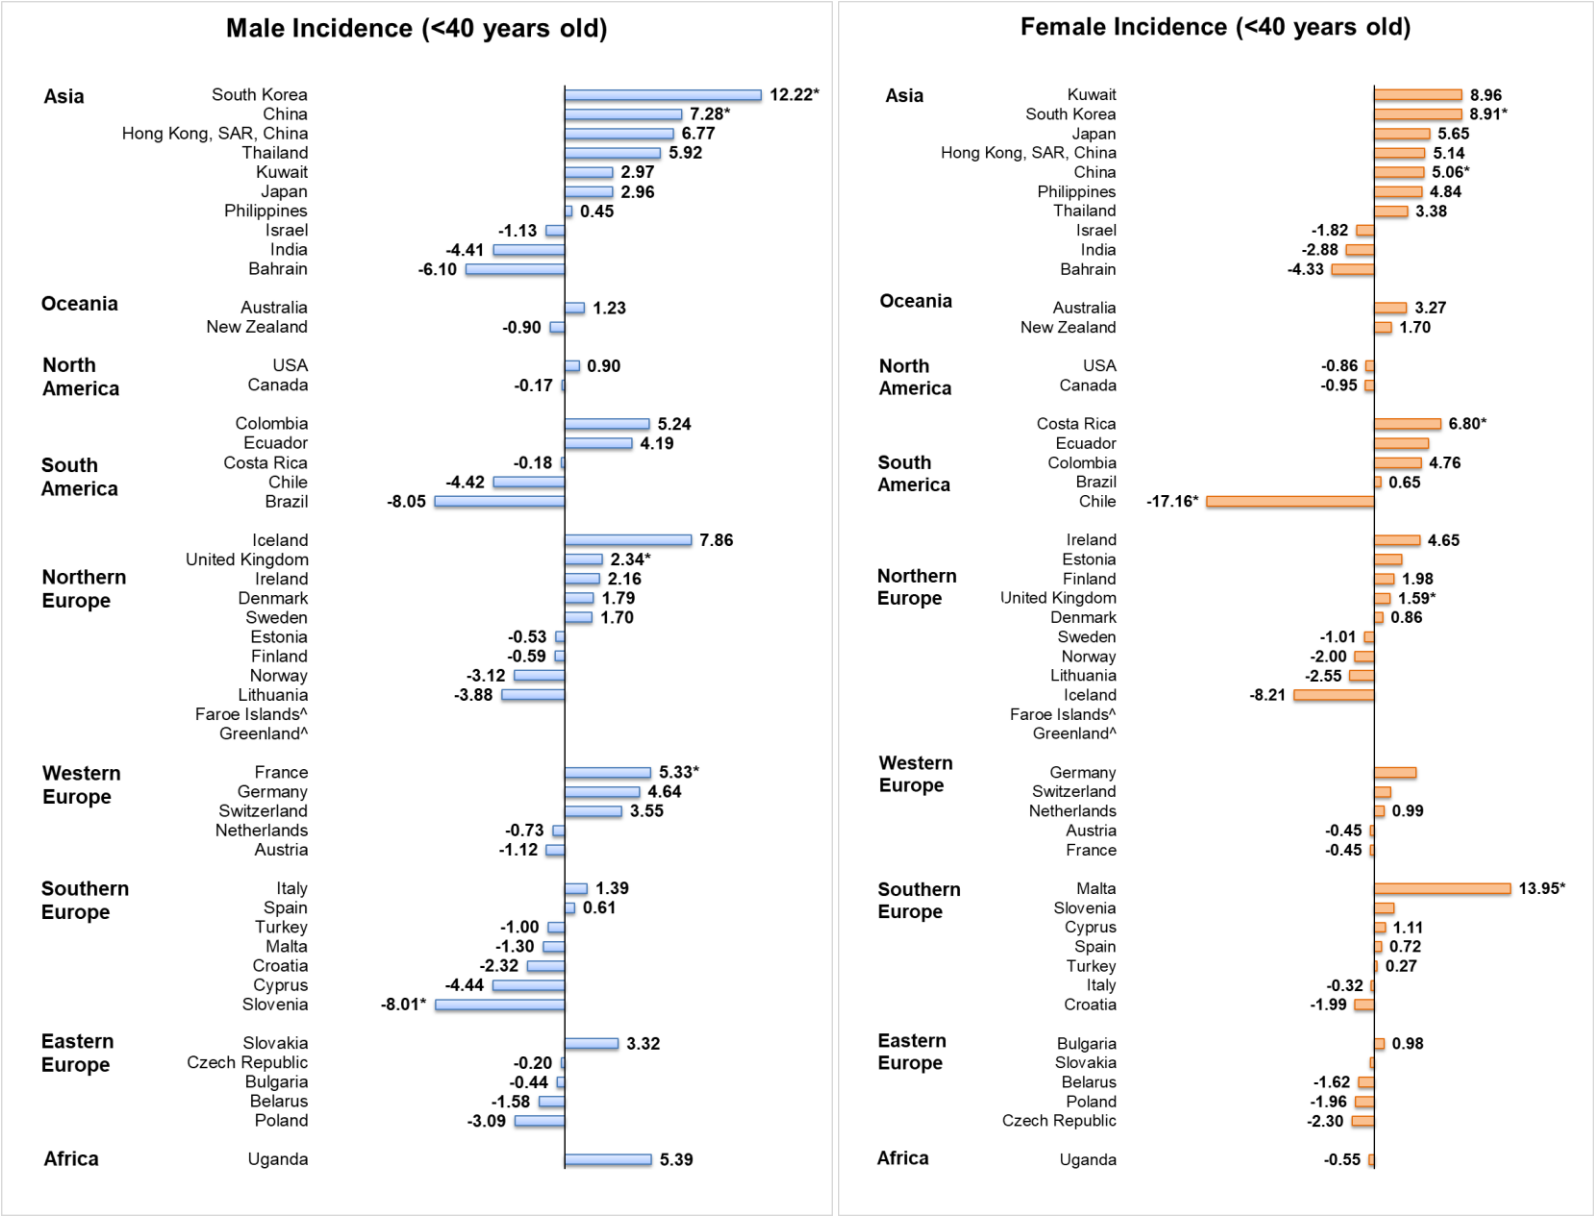

AAPC, annual percentage change; \*p values less than 0.05.
