# Supplementary material for: Incidence, mortality, risk factors, and trends for Hodgkin lymphoma: a global data analysis
Source: PubMed Central journal article supplement (PMC9097358; doi:10.1186/s13045-022-01281-9), 2022-05-11
Supplement: 13045_2022_1281_MOESM2_ESM.pdf [file 13045_2022_1281_MOESM2_ESM.pdf]

## **Supplementary Tables Legends**

**Supplementary Table 1.** Data sources for trend analysis

**Supplementary Table 2.** Global incidence and mortality of Hodgkin lymphoma in 2020 by region, sex and HDI

**Supplementary Table 3.** Sensitivity analysis for mortality trend in Chile and Ireland

**Supplementary Table 1.** Data sources for trend analysis

|                | <b>Incidence</b>             | <b>Mortality</b> |
|----------------|------------------------------|------------------|
| Australia      | CI5 (2003-2012)              | WHO (2007-2016)  |
| Austria        | CI5 (2003-2012)              | WHO (2008-2017)  |
| Bahrain        | CI5 (2003-2012)              | n/a              |
| Belarus        | CI5 (2003-2012)              | n/a              |
| Belgium        | n/a                          | WHO(2007-2016)   |
| Brazil         | CI5 (2003-2012) <sup>1</sup> | WHO (2007-2016)  |
| Bulgaria       | CI5 (2003-2012)              | WHO (2006-2015)  |
| Canada         | CI5 (2003-2012) <sup>2</sup> | WHO (2006-2015)  |
| Chile          | CI5 (2003-2012) <sup>3</sup> | WHO (2007-2016)  |
| China          | CI5 (2003-2012) <sup>4</sup> | n/a              |
| Colombia       | CI5 (2003-2012) <sup>5</sup> | WHO (2006-2015)  |
| Costa Rica     | CI5 (2002-2011)              | WHO (2005-2014)  |
| Croatia        | CI5 (2003-2012)              | WHO (2007-2016)  |
| Cyprus         | CI5 (2003-2012)              | WHO (2007-2016)  |
| Czech Republic | CI5 (2003-2012)              | WHO (2008-2017)  |

|                          |                               |                               |
|--------------------------|-------------------------------|-------------------------------|
| Denmark                  | NORDCAN (2010-2019)           | NORDCAN (2010-2019)           |
| Ecuador                  | CI5 (2003-2012) <sup>6</sup>  | WHO (2007-2016)               |
| Estonia                  | CI5 (2003-2012)               | WHO (2007-2016)               |
| Faroe Islands            | n/a                           | n/a                           |
| Finland                  | NORDCAN (2010-2019)           | NORDCAN (2010-2019)           |
| France                   | CI5 (2002-2011) <sup>7</sup>  | WHO (2006-2015)               |
| Germany                  | CI5 (2003-2012) <sup>8</sup>  | WHO (2007-2016)               |
| Greenland                | n/a                           | n/a                           |
| Hong Kong, SAR,<br>China | CI5 (2003-2012)               | WHO (2007-2016)               |
| Iceland                  | NORDCAN (2010-2019)           | n/a                           |
| India                    | CI5(2003-2012) <sup>9</sup>   | n/a                           |
| Ireland                  | CI5 (2003-2012)               | WHO (2006-2015)               |
| Israel                   | CI5 (2003-2012)               | WHO (2007-2016)               |
| Italy                    | CI5 (2001-2010) <sup>10</sup> | WHO (2006-2015)               |
| Japan                    | CI5 (2001-2010) <sup>11</sup> | WHO (2007-2016)               |
| Korea (South)            | CI5 (2003-2012) <sup>12</sup> | WHO (2007-2016) <sup>13</sup> |

---

|                    |                               |                     |
|--------------------|-------------------------------|---------------------|
| Kuwait             | CI5 (2003-2012)               | WHO (2005-2014)     |
| Latvia             | n/a                           | WHO (2006-2015)     |
| Lithuania          | CI5 (2003-2012)               | WHO (2008-2017)     |
| Malta              | CI5 (2003-2012)               | WHO (2006-2015)     |
| Netherlands        | CI5 (2003-2012)               | WHO (2007-2016)     |
| New Zealand        | CI5 (2003-2012)               | WHO (2005-2014)     |
| Norway             | NORDCAN (2010-2019)           | NORDCAN (2010-2019) |
| Philippines        | CI5 (2003-2012) <sup>14</sup> | WHO (2003-2012)     |
| Poland             | CI5 (2003-2012) <sup>15</sup> | WHO (2007-2016)     |
| Portugal           | n/a                           | WHO (2007-2016)     |
| Russian Federation | n/a                           | n/a                 |
| Singapore          | n/a                           | WHO (2006-2015)     |
| Slovakia           | CI5 (2001-2010)               | WHO (2005-2014)     |
| Slovenia           | CI5 (2003-2012)               | WHO (2006-2015)     |
| Spain              | CI5 (2001-2010) <sup>16</sup> | WHO (2007-2016)     |
| Sweden             | NORDCAN (2010-2019)           | NORDCAN (2010-2019) |

---

|                |                               |                               |
|----------------|-------------------------------|-------------------------------|
| Switzerland    | CI5 (2003-2012) <sup>17</sup> | WHO (2007-2016)               |
| Thailand       | CI5 (2003-2012) <sup>18</sup> | n/a                           |
| Turkey         | CI5 (2003-2012) <sup>19</sup> | n/a                           |
| Uganda         | CI5 (2003-2012) <sup>20</sup> | n/a                           |
| United Kingdom | CI5 (2003-2012) <sup>21</sup> | WHO (2007-2016)               |
| USA            | SEER(2003-2012) <sup>22</sup> | SEER(2007-2016) <sup>22</sup> |
| USA Black      | SEER(2003-2012) <sup>22</sup> | SEER(2007-2016) <sup>22</sup> |
| USA White      | SEER(2003-2012) <sup>22</sup> | SEER(2007-2016) <sup>22</sup> |

n/a” not available; CI5: Cancer Incidence in Five Continents V; NORDCAN: Nordic Cancer Registries’ SEER: USA: National Institutes of Health (NIH); WHO: World Health Organization

1. Brazil, Goiania
2. Canada (excl. Nunavut, Quebec and Yukon)
3. Chile, Valdivia
4. China (5 registries)
5. Colombia, Cali
6. Ecuador, Quito
7. France (9 registries)
8. Germany (2 registries)
9. India, Chennai
10. Italy (8 registries)

11. Japan (4 registries)
12. Korea (5 registries)
13. Republic of Korea
14. Philippines, Manila
15. Poland, Kielce
16. Spain (9 registries)
17. Switzerland (6 registries)
18. Thailand (4 registries)
19. Turkey (2 registries)
20. Uganda, Kampala
21. UK, England
22. USA, ( 9 registries)

**Reference:**

- a. CI5: [http://ci5.iarc.fr/CI5plus/Pages/table1\\_sel.aspx](http://ci5.iarc.fr/CI5plus/Pages/table1_sel.aspx)
- b. NORDCAN: <http://www-dep.iarc.fr/NORDCAN/english/frame.asp>
- c. SEER: <http://seer.cancer.gov/data/seerstat/>
- d. WHO: <http://apps.who.int/healthinfo/statistics/mortality/whodpms/>

**Supplementary Table 2.** Global incidence and mortality of Hodgkin lymphoma in 2020 by region, sex and HDI

| Region                     | Incidence  |      |           |      |           |      | Mortality  |      |        |      |        |      |
|----------------------------|------------|------|-----------|------|-----------|------|------------|------|--------|------|--------|------|
|                            | Both sexes |      | Men       |      | Women     |      | Both sexes |      | Men    |      | Women  |      |
|                            | New cases  | ASR  | New cases | ASR  | New cases | ASR  | Deaths     | ASR  | Deaths | ASR  | Deaths | ASR  |
| Eastern Asia               | 9,172      | 0.44 | 6,174     | 0.57 | 2,998     | 0.31 | 3,195      | 0.13 | 2,115  | 0.17 | 1,080  | 0.08 |
| South-Eastern Asia         | 3,197      | 0.45 | 1,990     | 0.59 | 1,207     | 0.33 | 1,016      | 0.14 | 656    | 0.20 | 360    | 0.10 |
| South-Central Asia         | 14,158     | 0.71 | 8,523     | 0.84 | 5,635     | 0.57 | 5,315      | 0.13 | 3,320  | 0.34 | 1,995  | 0.21 |
| Western Asia               | 5,215      | 1.9  | 3,007     | 2.1  | 2,208     | 1.6  | 1,553      | 0.59 | 923    | 0.69 | 630    | 0.47 |
| Australia and New Zealand  | 896        | 2.6  | 484       | 2.7  | 412       | 2.5  | 110        | 0.18 | 67     | 0.23 | 43     | 0.13 |
| Melanesia                  | 65         | 0.59 | 41        | 0.78 | 24        | 0.40 | 20         | 0.20 | 14     | 0.3  | 6      | 0.1  |
| Polynesia                  | n/a        | n/a  | n/a       | n/a  | n/a       | n/a  | n/a        | n/a  | n/a    | n/a  | n/a    | n/a  |
| Micronesia                 | n/a        | n/a  | n/a       | n/a  | n/a       | n/a  | n/a        | n/a  | n/a    | n/a  | n/a    | n/a  |
| North America              | 9,077      | 2.1  | 5,144     | 2.4  | 3,933     | 1.9  | 1,064      | 0.14 | 633    | 0.20 | 431    | 0.1  |
| Caribbean                  | 655        | 1.3  | 371       | 1.6  | 284       | 1.1  | 235        | 0.41 | 139    | 0.53 | 96     | 0.31 |
| Central America            | 2,888      | 1.5  | 1,686     | 1.9  | 1,202     | 1.2  | 798        | 0.42 | 476    | 0.54 | 322    | 0.31 |
| South America              | 7,091      | 1.5  | 4,173     | 1.8  | 2,918     | 1.2  | 1,802      | 0.35 | 1,056  | 0.44 | 746    | 0.26 |
| Northern Europe            | 3,288      | 2.6  | 1,872     | 3.0  | 1,416     | 2.3  | 511        | 0.23 | 305    | 0.30 | 206    | 0.16 |
| Central and Eastern Europe | 6,299      | 2.0  | 3,162     | 2.1  | 3,137     | 1.9  | 1,724      | 0.40 | 951    | 0.50 | 773    | 0.31 |
| Southern Europe            | 4,681      | 2.8  | 2,617     | 3.1  | 2,064     | 2.5  | 973        | 0.31 | 556    | 0.39 | 417    | 0.23 |
| Western Europe             | 5,590      | 2.5  | 3,351     | 3.0  | 2,239     | 2.1  | 745        | 0.17 | 467    | 0.24 | 278    | 0.1  |
| Northern Africa            | 3,719      | 1.6  | 2,118     | 1.8  | 1,601     | 1.3  | 1,204      | 0.53 | 716    | 0.66 | 488    | 0.39 |
| Eastern Africa             | 2,930      | 0.77 | 1,768     | 0.94 | 1,162     | 0.61 | 1,334      | 0.39 | 811    | 0.17 | 523    | 0.3  |
| Southern Africa            | 712        | 1.0  | 403       | 1.2  | 309       | 0.86 | 175        | 0.27 | 108    | 0.36 | 67     | 0.19 |
| Western Africa             | 2,815      | 0.86 | 1,705     | 1.1  | 1,110     | 0.67 | 1,299      | 0.45 | 789    | 0.57 | 510    | 0.34 |
| Middle Africa              | 639        | 0.46 | 392       | 0.57 | 247       | 0.36 | 303        | 0.24 | 186    | 0.31 | 117    | 0.19 |
| Low HDI                    | 6,812      | 0.83 | 4,139     | 0.83 | 2,673     | 0.64 | 3,135      | 0.43 | 1,931  | 0.55 | 1,204  | 0.32 |
| Medium HDI                 | 15,752     | 0.69 | 9,323     | 0.78 | 6,429     | 0.57 | 5,974      | 0.27 | 3,646  | 0.33 | 2,328  | 0.21 |
| High HDI                   | 25,408     | 0.79 | 15,249    | 1.0  | 10,159    | 0.63 | 8,144      | 0.23 | 5,101  | 0.29 | 3,043  | 0.16 |
| Very High HDI              | 35,098     | 2.0  | 20,260    | 2.2  | 14,838    | 1.70 | 6,123      | 0.23 | 3,610  | 0.29 | 2,513  | 0.16 |
| World                      | 83,087     | 0.98 | 48,981    | 1.2  | 34,106    | 0.80 | 23,376     | 0.26 | 14,288 | 0.33 | 9,088  | 0.19 |

HDI, human development index; ASR, age-standardized rate; a/n, data not available in the database. Data source: GLOBOCAN 2020 (<https://gco.iarc.fr/>)

**Supplementary Table 3.** Sensitivity analysis for mortality trend in Chile and Ireland

| Year removed | Chile-male mortality |           |            |         | Ireland-male mortality |           |            |        |
|--------------|----------------------|-----------|------------|---------|------------------------|-----------|------------|--------|
|              | AAPC                 | 95%CI Low | 95%CI High | p       | AAPC                   | 95%CI Low | 95%CI High | p      |
| 2007         | 8.28                 | 2.56      | 14.32      | 0.011*  | 3.86                   | -2.41     | 10.54      | 0.193  |
| 2008         | 7.36                 | 1.57      | 13.48      | 0.019*  | 7.33                   | 1.09      | 13.96      | 0.027* |
| 2009         | 7.83                 | 1.87      | 14.13      | 0.016*  | 5.18                   | -1.25     | 12.02      | 0.100  |
| 2010         | 8.52                 | 4.48      | 12.71      | <0.001* | 6.98                   | 0.78      | 13.57      | 0.032* |
| 2011         | 8.32                 | 4.12      | 12.68      | 0.002*  | 6.59                   | -0.24     | 13.88      | 0.057  |
| 2012         | 8.32                 | 2.28      | 14.72      | 0.013*  | 6.59                   | -0.26     | 13.91      | 0.057  |
| 2013         | 8.19                 | 1.99      | 14.78      | 0.016*  | 6.82                   | 0.37      | 13.68      | 0.041* |
| 2014         | 7.54                 | 1.20      | 14.27      | 0.025*  | 4.89                   | -1.12     | 11.27      | 0.097  |
| 2015         | 7.25                 | 0.96      | 13.92      | 0.029*  | 6.63                   | -0.14     | 13.86      | 0.054  |
| 2016         | 5.74                 | 0.24      | 11.54      | 0.043*  | 5.38                   | -1.51     | 12.74      | 0.109  |

AAPC, average annual percentage change; CI, confidence interval; \* statistically significant
